# Supplementary material for: Inhibition of PTK6 Hinders the Growth and Migration of Ovarian Cancer and Its Potential Clinical Significance
Source: Research Square preprint supplement (doi:10.21203/rs.3.rs-8166231/v1), 2025-12-12
Supplement: Supplementary file 1 [file 27adb93cbb7c4f538081d37b.xlsx]

## Sheet: PTK6_cor_deg_genes
Gene1	Gene2	cor	p
PTK6	AASS	-0.23137	1.3854e-06
PTK6	ABCA10	0.10444	0.031155
PTK6	ABCA6	0.074141	0.12654
PTK6	ABCA9	0.10012	0.038863
PTK6	ABHD11	0.24555	2.8664e-07
PTK6	AC008992.1	0.10823	0.02549
PTK6	AC234582.1	0.3311	2.3421e-12
PTK6	ACAD11	0.010657	0.8264
PTK6	AGRN	0.060487	0.2128
PTK6	AL162151.3	0.050907	0.2945
PTK6	ALG3	0.12773	0.0083061
PTK6	ANLN	0.019078	0.69458
PTK6	AP1M2	0.19137	7.0367e-05
PTK6	AQP5	0.042582	0.38065
PTK6	ARHGAP11A	-0.084728	0.080678
PTK6	ARHGAP8	0.20426	2.1532e-05
PTK6	ARMCX4	-0.10657	0.027857
PTK6	ASF1B	-0.14501	0.0026984
PTK6	ASIP	-0.11837	0.014501
PTK6	ASPM	-0.16508	0.00062462
PTK6	ATP6V1B1	0.22153	3.9066e-06
PTK6	AUNIP	-0.1092	0.024198
PTK6	AURKB	-0.25976	5.3522e-08
PTK6	BAIAP2L1	0.16397	0.00068037
PTK6	BCAM	-0.01347	0.78161
PTK6	BIRC5	-0.16373	0.00069319
PTK6	BLM	-0.12454	0.010082
PTK6	BRI3BP	0.049051	0.31247
PTK6	BSPRY	0.25944	5.5634e-08
PTK6	BUB1	-0.20165	2.7549e-05
PTK6	BUB1B	-0.21078	1.1492e-05
PTK6	C19orf33	0.30931	6.7553e-11
PTK6	C1orf106	0.22697	2.2145e-06
PTK6	C1orf186	0.23368	1.0791e-06
PTK6	C1orf210	0.12193	0.01178
PTK6	C2orf15	-0.23207	1.2856e-06
PTK6	C6orf132	0.21555	7.1631e-06
PTK6	CACNB2	-0.03353	0.49006
PTK6	CACNG4	0.047986	0.32312
PTK6	CAMSAP3	0.043492	0.37054
PTK6	CBLC	0.35413	4.951e-14
PTK6	CCDC64B	0.41854	1.6992e-19
PTK6	CCNB1	-0.28047	3.8517e-09
PTK6	CCNB2	-0.15897	0.00099297
PTK6	CCNE1	-0.097225	0.044903
PTK6	CD24	0.029204	0.54777
PTK6	CDC20	-0.1586	0.001021
PTK6	CDC25C	-0.17845	0.00021374
PTK6	CDC45	-0.10937	0.023972
PTK6	CDCA2	-0.16399	0.00067948
PTK6	CDCA5	-0.1465	0.002435
PTK6	CDCA8	-0.15857	0.0010234
PTK6	CDCP1	0.40859	1.4269e-18
PTK6	CDH1	-0.01008	0.83566
PTK6	CDK1	-0.16444	0.00065608
PTK6	CDKN2A	-0.029988	0.53706
PTK6	CDKN3	-0.092258	0.057086
PTK6	CDT1	-0.066327	0.17179
PTK6	CELSR1	0.14359	0.0029749
PTK6	CELSR2	0.1865	0.00010796
PTK6	CENPA	-0.23377	1.0689e-06
PTK6	CENPF	-0.22122	4.033e-06
PTK6	CENPM	-0.023434	0.62958
PTK6	CEP55	-0.03293	0.49786
PTK6	CHMP4C	0.16295	0.00073564
PTK6	CHST7	-0.046503	0.33831
PTK6	CIRBP	0.12373	0.010588
PTK6	CKAP2	-0.17891	0.00020579
PTK6	CKAP2L	-0.19749	4.0483e-05
PTK6	CKS2	-0.18322	0.00014304
PTK6	CLDN16	0.13385	0.0056565
PTK6	CLDN3	0.15242	0.0016045
PTK6	CLDN4	0.22242	3.5626e-06
PTK6	CLDN6	-0.28168	3.2804e-09
PTK6	CLDN7	0.2034	2.336e-05
PTK6	CLIC5	0.19061	7.5277e-05
PTK6	CLK1	-0.025381	0.60138
PTK6	CMTM7	0.071548	0.1404
PTK6	CMTM8	0.11974	0.013397
PTK6	CMYA5	-2.1899e-05	0.99964
PTK6	CORO2A	0.21862	5.2583e-06
PTK6	CP	0.19025	7.7691e-05
PTK6	CRABP2	0.013902	0.7748
PTK6	CRB3	0.15879	0.0010067
PTK6	CTXN1	-0.15356	0.0014773
PTK6	CXADR	0.10751	0.0265
PTK6	CXXC5	0.056834	0.24178
PTK6	CYP2S1	0.077463	0.11037
PTK6	DCDC2	-0.035474	0.46523
PTK6	DDIAS	-0.060809	0.21037
PTK6	DEPDC1	-0.19441	5.358e-05
PTK6	DEPDC1B	-0.28224	3.0453e-09
PTK6	DIAPH3	-0.01867	0.7008
PTK6	DIO3OS	0.094262	0.051877
PTK6	DLGAP5	-0.23	1.6057e-06
PTK6	DOK7	0.18628	0.00011
PTK6	DPP3	0.17192	0.00036462
PTK6	DSP	0.048679	0.31617
PTK6	DTL	-0.26514	2.76e-08
PTK6	E2F2	-0.033405	0.49168
PTK6	E2F8	-0.13102	0.0067703
PTK6	ECE2	0.05763	0.23524
PTK6	ECHDC2	0.2383	6.495e-07
PTK6	ECT2	-0.1536	0.0014734
PTK6	EGFL6	-0.13556	0.0050689
PTK6	ELF3	0.32737	4.2455e-12
PTK6	EML5	-0.055673	0.25155
PTK6	EPCAM	0.02893	0.55152
PTK6	EPHA1	0.072812	0.13351
PTK6	EPPK1	0.18956	8.2572e-05
PTK6	EPS8L1	0.28017	4.0085e-09
PTK6	ERBB3	0.20568	1.8809e-05
PTK6	ESPL1	-0.17706	0.00023998
PTK6	ESPN	0.15818	0.0010538
PTK6	ESRP1	0.19312	6.0214e-05
PTK6	ESRP2	0.11658	0.01607
PTK6	ETV4	0.083907	0.083669
PTK6	EVA1A	0.0435	0.37046
PTK6	EVPL	0.34464	2.5216e-13
PTK6	EXO1	-0.22553	2.5782e-06
PTK6	EZH1	0.073112	0.13191
PTK6	FAM13A-AS1	0.18307	0.00014489
PTK6	FAM83D	-0.18998	7.9592e-05
PTK6	FAM83H	0.42525	3.8862e-20
PTK6	FAM83H-AS1	0.34145	4.3008e-13
PTK6	FGF18	0.028897	0.55198
PTK6	FOLR1	0.24999	1.7154e-07
PTK6	FOXM1	-0.2239	3.0543e-06
PTK6	FRAT2	0.068568	0.15773
PTK6	GALNT12	0.21945	4.831e-06
PTK6	GCKR	0.17239	0.00035101
PTK6	GINS1	-0.37904	5.2844e-16
PTK6	GJB1	0.22379	3.091e-06
PTK6	GOLGA8N	0.056935	0.24095
PTK6	GPRASP1	-0.032627	0.50183
PTK6	GPRASP2	-0.1367	0.0047077
PTK6	GRB7	-0.0069924	0.88558
PTK6	GRHL2	0.16318	0.0007226
PTK6	GRIP2	0.039975	0.41052
PTK6	GRK5	-0.04143	0.39368
PTK6	GTSE1	-0.11806	0.014762
PTK6	HJURP	-0.24072	4.9604e-07
PTK6	HMGA1	-0.042302	0.3838
PTK6	HMGB3	-0.17118	0.0003866
PTK6	HMMR	-0.23617	8.218e-07
PTK6	HOOK1	0.010835	0.82356
PTK6	IGSF9	-0.23925	5.8421e-07
PTK6	IL4I1	0.25765	6.9085e-08
PTK6	ILDR1	0.23846	6.3805e-07
PTK6	IQGAP3	-0.046689	0.33638
PTK6	IRF6	0.12017	0.013064
PTK6	IZUMO4	0.13915	0.004006
PTK6	KDF1	0.12636	0.0090303
PTK6	KIAA0101	-0.17653	0.00025056
PTK6	KIAA0895L	-0.036159	0.45666
PTK6	KIF11	-0.19584	4.708e-05
PTK6	KIF14	-0.20941	1.3138e-05
PTK6	KIF15	-0.29213	7.9278e-10
PTK6	KIF18A	-0.22326	3.2654e-06
PTK6	KIF18B	-0.22205	3.6998e-06
PTK6	KIF20A	-0.13827	0.0042468
PTK6	KIF23	-0.15769	0.0010928
PTK6	KIF2C	-0.19188	6.7234e-05
PTK6	KIF4A	-0.18814	9.3593e-05
PTK6	KIFC1	-0.22518	2.673e-06
PTK6	KLF5	0.21108	1.116e-05
PTK6	KLHL14	0.12554	0.0094918
PTK6	KPNA2	-0.026314	0.58808
PTK6	KRT18	0.11119	0.021717
PTK6	KRT7	0.38688	1.165e-16
PTK6	KRT8	0.032606	0.5021
PTK6	KRTCAP3	0.1622	0.00077903
PTK6	LAD1	0.33147	2.2059e-12
PTK6	LAMA2	-0.01408	0.77199
PTK6	LAMC2	0.35	1.0126e-13
PTK6	LAMP3	0.0116	0.81131
PTK6	LMNB1	-0.29456	5.6495e-10
PTK6	LOC100421166	0.028547	0.55681
PTK6	LRRC8D	0.019794	0.68373
PTK6	LRRC8E	0.30783	8.4036e-11
PTK6	LSR	0.15267	0.0015752
PTK6	MAL2	0.36684	5.1272e-15
PTK6	MAP3K5	0.23721	7.3329e-07
PTK6	MARVELD2	-0.044744	0.35691
PTK6	MARVELD3	-0.005758	0.90567
PTK6	MCM2	-0.27545	7.4356e-09
PTK6	MECOM	-0.10948	0.023838
PTK6	MEG3	0.064668	0.1828
PTK6	MELK	-0.20857	1.4245e-05
PTK6	METTL7B	0.066798	0.16877
PTK6	MISP	0.21052	1.1782e-05
PTK6	MKI67	-0.10907	0.024369
PTK6	MMP15	0.076652	0.11416
PTK6	MMP7	0.25199	1.3569e-07
PTK6	MSLN	0.20675	1.6983e-05
PTK6	MTMR9LP	-0.14213	0.0032829
PTK6	MUC1	0.36742	4.6197e-15
PTK6	MUC16	0.39311	3.4091e-17
PTK6	MUM1L1	-0.18359	0.00013862
PTK6	MYBL2	-0.22674	2.2703e-06
PTK6	MYH14	0.36179	1.2789e-14
PTK6	MYO5B	0.26855	1.7984e-08
PTK6	NCAPG	-0.26062	4.8155e-08
PTK6	NCAPH	-0.30405	1.4614e-10
PTK6	NDC80	-0.22677	2.2623e-06
PTK6	NEK2	-0.25878	6.0254e-08
PTK6	NKTR	0.02145	0.65887
PTK6	NOL4L	-0.13959	0.0038916
PTK6	NPHP3	-0.072373	0.13588
PTK6	NR2F6	-0.064372	0.18481
PTK6	NUAK2	0.078394	0.10614
PTK6	NUF2	-0.26826	1.8667e-08
PTK6	NUP210	-0.012723	0.79345
PTK6	NXPH4	-0.19697	4.2472e-05
PTK6	OR7E14P	0.11737	0.015359
PTK6	OVOL2	0.1555	0.0012835
PTK6	PAGR1	-0.11805	0.014773
PTK6	PARD6B	-0.025874	0.59434
PTK6	PARPBP	-0.24459	3.1986e-07
PTK6	PART1	-0.16242	0.00076588
PTK6	PAX8	0.11266	0.020029
PTK6	PBK	-0.17342	0.0003231
PTK6	PER1	0.11646	0.016177
PTK6	PGM5P2	-0.070094	0.14867
PTK6	PKMYT1	-0.091154	0.060136
PTK6	PKP3	0.35515	4.1408e-14
PTK6	PLA2G5	0.033707	0.48777
PTK6	PLIN5	0.25937	5.6096e-08
PTK6	PLK1	-0.1811	0.0001713
PTK6	PLS1	0.13621	0.0048589
PTK6	POC1A	-0.094786	0.050582
PTK6	POU6F1	-0.067928	0.16166
PTK6	PPP1CA	0.16243	0.00076546
PTK6	PRR11	-0.17181	0.0003678
PTK6	PRR7	-0.0040692	0.93326
PTK6	PRRG2	0.264	3.1787e-08
PTK6	PRRT2	-0.12248	0.011405
PTK6	PRSS8	0.12881	0.0077712
PTK6	PSD4	0.21333	8.9407e-06
PTK6	PTGS1	0.091994	0.057804
PTK6	PTPN6	0.039426	0.41698
PTK6	PTTG1	-0.19076	7.4273e-05
PTK6	PVRL4	0.38293	2.5098e-16
PTK6	RABIF	0.067737	0.16284
PTK6	RACGAP1	-0.24493	3.0769e-07
PTK6	RAD51	-0.083385	0.085618
PTK6	RAD51AP1	-0.41267	6.0188e-19
PTK6	RAD54L	-0.22618	2.406e-06
PTK6	RBM47	0.15241	0.001606
PTK6	RBM5	0.013492	0.78127
PTK6	RBM6	0.015722	0.74626
PTK6	RGS19	0.22516	2.6795e-06
PTK6	RHPN1-AS1	0.22405	3.0072e-06
PTK6	RHPN2	0.11175	0.021059
PTK6	RIPK4	0.26246	3.8429e-08
PTK6	RP11-1000B6.7	0.086506	0.074496
PTK6	RP11-236L14.2	-0.031613	0.51522
PTK6	RP11-323N12.5	-0.021445	0.65895
PTK6	RP11-532F12.5	0.24275	3.9446e-07
PTK6	RP11-597D13.9	0.11893	0.014045
PTK6	RRM2	-0.11982	0.013334
PTK6	RUFY3	-0.12233	0.011506
PTK6	S100A1	0.26689	2.2172e-08
PTK6	SAMD10	0.19994	3.2292e-05
PTK6	SAPCD2	0.055974	0.24899
PTK6	SCNN1A	0.16594	0.00058435
PTK6	SERINC2	0.30911	6.9516e-11
PTK6	SGOL1	-0.18355	0.00013918
PTK6	SKA1	-0.13796	0.0043336
PTK6	SKA3	-0.15446	0.0013848
PTK6	SLC12A8	0.17708	0.00023948
PTK6	SLC29A2	-0.0017107	0.97192
PTK6	SLC34A2	0.31289	3.9622e-11
PTK6	SLC4A3	-0.030195	0.53425
PTK6	SMIM22	0.19925	3.4421e-05
PTK6	SMPDL3B	-0.074979	0.1223
PTK6	SNRNP70	0.09658	0.04635
PTK6	SOX17	-0.073637	0.12916
PTK6	SOX9	-0.022142	0.6486
PTK6	SPC24	-0.17688	0.00024344
PTK6	SPC25	-0.17336	0.00032464
PTK6	SPINT1	0.20677	1.6947e-05
PTK6	SRSF5	0.038968	0.42241
PTK6	ST14	0.2068	1.6895e-05
PTK6	STARD9	-0.055585	0.2523
PTK6	STAT5B	0.046348	0.33993
PTK6	STIL	-0.0737	0.12883
PTK6	STXBP2	0.19003	7.9272e-05
PTK6	SYK	-0.095939	0.047827
PTK6	SYNE1	0.070931	0.14387
PTK6	SYT13	-0.24346	3.6397e-07
PTK6	SYT17	-0.030825	0.52575
PTK6	SYTL4	0.10358	0.032568
PTK6	TACSTD2	0.44732	2.3858e-22
PTK6	TBC1D4	-0.023701	0.62568
PTK6	TCEAL1	-0.0094875	0.8452
PTK6	TCEAL4	0.044695	0.35745
PTK6	TJP3	0.34166	4.1565e-13
PTK6	TK1	0.053528	0.27031
PTK6	TMC4	0.40955	1.1655e-18
PTK6	TMEM102	0.15835	0.0010405
PTK6	TMEM125	0.19838	3.7295e-05
PTK6	TMEM139	0.20714	1.6363e-05
PTK6	TMEM238	0.33316	1.6793e-12
PTK6	TMPRSS3	0.19207	6.6108e-05
PTK6	TOP2A	-0.32415	7.0418e-12
PTK6	TPD52	0.16341	0.00070995
PTK6	TPX2	-0.27456	8.3477e-09
PTK6	TRIP13	-0.13512	0.0052129
PTK6	TROAP	-0.23496	9.3825e-07
PTK6	TSPYL2	0.0085207	0.8608
PTK6	TTC22	0.36977	2.9975e-15
PTK6	TTK	-0.24877	1.9782e-07
PTK6	TUBA1C	-0.021777	0.65401
PTK6	UBE2C	-0.2635	3.3791e-08
PTK6	UBE2Q2P1	0.18899	8.6811e-05
PTK6	UBE2T	-0.26742	2.0736e-08
PTK6	UCP2	0.23147	1.3705e-06
PTK6	UGT8	-0.13592	0.0049508
PTK6	UHRF1	-0.080961	0.095149
PTK6	UNC93B1	0.43792	2.1871e-21
PTK6	VAMP8	0.24321	3.7427e-07
PTK6	VTCN1	0.32402	7.1896e-12
PTK6	WFDC2	0.029083	0.54943
PTK6	WNT10A	0.010412	0.83034
PTK6	WWC1	0.24618	2.6658e-07
PTK6	ZDHHC12	0.077697	0.1093
PTK6	ZNF514	0.031291	0.51951
PTK6	ZNF540	-0.011113	0.81911
PTK6	ZWINT	-0.15639	0.0012024
PTK6	PNKD	0.027665	0.56906
PTK6	CTD-2396E7.11	0.12878	0.0077862
PTK6	MFSD6L	0.097489	0.044323
PTK6	PRRG4	0.23503	9.318e-07
PTK6	WNT7A	0.19817	3.8022e-05
PTK6	TTC30B	-0.24572	2.811e-07
PTK6	CLSPN	-0.15321	0.0015151
PTK6	RPL39L	-0.15137	0.0017294
PTK6	LINC00511	0.041829	0.38914
PTK6	RNF43	-0.18264	0.00015035
PTK6	NACC1	-0.050327	0.30004
PTK6	SAMD12	0.36612	5.8499e-15
PTK6	LYPD6B	0.07165	0.13984
PTK6	SKAP1	0.086084	0.075926
PTK6	KIAA1211L	0.19659	4.3979e-05
PTK6	MND1	-0.23721	7.3325e-07
PTK6	LINC01224	-0.25336	1.1544e-07
PTK6	BTAF1	0.06539	0.17794
PTK6	MCM10	-0.30549	1.185e-10
PTK6	MYCL	-0.14169	0.0033822
PTK6	RP11-440D17.3	-0.13914	0.004009
PTK6	UBALD2	0.14261	0.003179
PTK6	CTD-3035K23.7	-0.0063784	0.89557
PTK6	PDK4	-0.074225	0.12612
PTK6	SSX2IP	-0.32744	4.1953e-12
PTK6	FAM111B	-0.0023934	0.96072
PTK6	CASP12	-0.043227	0.37347
PTK6	LAPTM4B	0.20598	1.828e-05
PTK6	HLF	-0.0083934	0.86286
PTK6	EPHX4	0.15154	0.0017084
PTK6	NR2F2-AS1	-0.070517	0.14623
PTK6	BIK	0.3704	2.6716e-15
PTK6	TSPAN15	0.29579	4.7519e-10
PTK6	VANGL1	0.026393	0.58696
PTK6	SPTBN2	0.26619	2.4207e-08
PTK6	RCAN3	0.0072859	0.88081
PTK6	RP11-598P20.5	0.086004	0.076202
PTK6	S100A14	0.3571	2.9399e-14
PTK6	FOXJ1	-0.081312	0.093719
PTK6	MCC	0.021423	0.65927
PTK6	SHANK2	0.13583	0.0049814
PTK6	RP11-394O4.5	0.097667	0.043934
PTK6	POLQ	-0.10425	0.031463
PTK6	RASSF7	0.12063	0.012716
PTK6	CLDN9	-0.11125	0.021645
PTK6	GOLGA6L5P	0.15963	0.0009454
PTK6	PRSS21	0.020558	0.67221
PTK6	WSB1	-0.13774	0.0043965
PTK6	ABRACL	-0.1215	0.012087
PTK6	ARHGAP10	-0.15979	0.00093388
PTK6	TACC3	-0.17632	0.00025491
PTK6	DENND2D	0.27728	5.8634e-09
PTK6	GPR160	0.052915	0.27584
PTK6	GOLGA6L4	0.14931	0.0020013
PTK6	TAF1C	0.0047794	0.92165
PTK6	MTL5	0.0021028	0.96548
PTK6	XRCC2	-0.18787	9.5802e-05
PTK6	RP11-449J21.5	-0.02085	0.66784
PTK6	PPT2-EGFL8	-0.085266	0.078764
PTK6	PLEKHG6	-0.15632	0.0012088
PTK6	RP4-568C11.4	0.10835	0.025323
PTK6	EYA2	0.12103	0.012426
PTK6	GLDC	0.05841	0.22896
PTK6	HID1	0.26423	3.0904e-08
PTK6	CSPG4P12	0.017926	0.71218
PTK6	RP11-216L13.19	-0.064727	0.18239
PTK6	EHF	0.25748	7.0499e-08
PTK6	RASAL1	0.24908	1.9066e-07
PTK6	RP11-213G2.3	-0.12204	0.011708
PTK6	KSR2	-0.034742	0.4745
PTK6	MAP7	0.065031	0.18034
PTK6	NEIL3	-0.2125	9.7018e-06
PTK6	CASC5	-0.13817	0.0042741
PTK6	ABCA8	0.016292	0.7374
PTK6	DOK5	0.057167	0.23903
PTK6	TBC1D2B	0.20661	1.7214e-05
PTK6	KRT8P3	0.042288	0.38395
PTK6	MAD2L1	-0.21436	8.0724e-06
PTK6	LAMB3	0.19311	6.0268e-05
PTK6	MRGPRF-AS1	0.074411	0.12517
PTK6	RP11-522B15.6	0.0042938	0.92959
PTK6	SESN1	-0.11958	0.013522
PTK6	AC007796.1	0.041069	0.39782
PTK6	DSC2	-0.087627	0.070801
PTK6	CHCHD10	0.24618	2.6677e-07
PTK6	USP43	0.19708	4.2023e-05
PTK6	KLK8	0.23073	1.4851e-06
PTK6	SCGB2A1	0.13198	0.0063742
PTK6	TLCD1	0.11159	0.02124
PTK6	FAM193B	-0.029757	0.54021
PTK6	XPR1	0.067493	0.16437
PTK6	AC012360.6	0.14876	0.0020802
PTK6	SHROOM3	0.18954	8.2715e-05
PTK6	MYB	-0.1029	0.033729
PTK6	KCNK15	0.21767	5.7882e-06
PTK6	LINC00304	0.14485	0.0027288
PTK6	SBK1	-0.4048	3.1503e-18
PTK6	MCM4	-0.12703	0.0086716
PTK6	FAAH2	0.084505	0.081483
PTK6	ARL4C	0.010168	0.83425
PTK6	LINC01132	-0.0927	0.055903
PTK6	MAMDC2	-0.017204	0.72329
PTK6	TNNT1	0.01713	0.72443
PTK6	CXCL16	0.31471	3.0123e-11
PTK6	RP11-752D24.2	-0.052256	0.28187
PTK6	ESCO2	-0.17038	0.00041211
PTK6	HAND2-AS1	-0.042808	0.37812
PTK6	BLACAT1	0.0013265	0.97822
PTK6	KCTD14	-0.087985	0.069651
PTK6	RP3-325F22.5	-0.0037899	0.93783
PTK6	MT1F	-0.029208	0.5477
PTK6	CTB-50L17.14	0.22623	2.3936e-06
PTK6	TMEM184A	0.33346	1.6005e-12
PTK6	THEM6	0.41109	8.4088e-19
PTK6	MIR143HG	0.095243	0.049474
PTK6	HSH2D	0.10653	0.027908
PTK6	RP11-283G6.5	0.075318	0.12062
PTK6	KLF3-AS1	-0.049277	0.31025
PTK6	ADGRG1	0.18211	0.0001573
PTK6	PRMT9	-0.16162	0.00081393
PTK6	RP11-295M3.4	0.006055	0.90083
PTK6	PAQR4	0.016083	0.74065
PTK6	SLPI	0.29135	8.8275e-10
PTK6	CSGALNACT1	0.065649	0.17623
PTK6	RP11-327J17.9	-0.055299	0.25476
PTK6	CENPN	-0.20835	1.4556e-05
PTK6	BEND3	-0.25589	8.5332e-08
PTK6	TFAP2C	0.26975	1.5462e-08
PTK6	ADHFE1	0.038653	0.42619
PTK6	TDRKH	-0.095863	0.048004
PTK6	PRR15L	0.22997	1.6105e-06
PTK6	GGT6	0.16104	0.00085043
PTK6	PPP1R14B	0.17921	0.00020065
PTK6	PNPLA7	0.25242	1.2889e-07
PTK6	RP11-689P11.2	0.034919	0.47225
PTK6	PSAT1	-0.12129	0.012235
PTK6	FXYD3	0.28744	1.511e-09
PTK6	CKS1B	-0.1897	8.1566e-05
PTK6	ZNF471	-0.011192	0.81784
PTK6	AC009501.4	0.052552	0.27916
PTK6	JUP	0.15658	0.0011854
PTK6	ZNF331	0.045187	0.35217
PTK6	LRRTM1	-0.075138	0.12151
PTK6	M1AP	-0.089394	0.065278
PTK6	C16orf59	-0.31324	3.7588e-11
PTK6	ZNF695	-0.28348	2.5771e-09
PTK6	VGLL1	0.35245	6.6333e-14
PTK6	HKDC1	-0.0010099	0.98342
PTK6	MLK4	-0.043294	0.37273
PTK6	CDC6	-0.18012	0.00018593
PTK6	GOLGA8R	0.054901	0.25819
PTK6	CENPK	-0.28666	1.6803e-09
PTK6	TGFBR3	-0.073602	0.12934
PTK6	TTLL3	0.11653	0.016114
PTK6	CDK5	-0.064202	0.18597
PTK6	CTCFL	-0.14996	0.0019122
PTK6	GJB3	0.39749	1.4122e-17
PTK6	SLC44A4	0.18465	0.00012661
PTK6	SPA17	-0.10204	0.035261
PTK6	TUBGCP6	0.28417	2.3491e-09
PTK6	RRN3P2	0.093621	0.053497
PTK6	FAM64A	-0.23369	1.078e-06
PTK6	ALDH3B2	0.28397	2.415e-09
PTK6	CCNA1	0.056614	0.24361
PTK6	HOXB7	0.0092835	0.84849
PTK6	GUSBP11	0.095182	0.04962
PTK6	N4BP2L2-IT2	0.084878	0.080139
PTK6	ANXA3	-0.037865	0.43568
PTK6	ZBTB42	0.10001	0.039077
PTK6	NBPF8	-0.033522	0.49017
PTK6	KREMEN2	-0.31124	5.0723e-11
PTK6	F2RL1	0.08356	0.084962
PTK6	CYBA	0.25708	7.3976e-08
PTK6	CAPN13	0.023031	0.63548
PTK6	CD9	0.080567	0.096774
PTK6	PPM1K	-0.19939	3.3975e-05
PTK6	DCTPP1	-0.0012185	0.98
PTK6	ADAMTS4	0.088019	0.069543
PTK6	SMKR1	0.12758	0.0083844
PTK6	RPS6KA1	0.34621	1.9329e-13
PTK6	PRR36	-0.16619	0.00057316
PTK6	KRT80	0.33233	1.9213e-12
PTK6	SPP1	0.16555	0.00060223
PTK6	RBBP8NL	0.26197	4.0815e-08
PTK6	MACC1	0.29414	5.9928e-10
PTK6	FAM181A	-0.12589	0.0092929
PTK6	LINC00958	0.015792	0.74517
PTK6	WFIKKN2	-0.12302	0.011042
PTK6	ASRGL1	0.10388	0.032067
PTK6	KLK7	0.28341	2.6037e-09
PTK6	KLHDC1	0.030425	0.53114
PTK6	KCNC3	0.17504	0.00028321
PTK6	CBX7	0.37887	5.466e-16
PTK6	SIGLEC16	0.085679	0.077321
PTK6	RNASE4	-0.054714	0.25982
PTK6	E2F3	-0.14471	0.0027552
PTK6	CCDC68	-0.018749	0.6996
PTK6	LL0XNC01-116E7.1	-0.17341	0.00032336
PTK6	TMEM150C	-0.020797	0.66863
PTK6	ASS1	0.18013	0.00018584
PTK6	SEL1L3	0.074708	0.12366
PTK6	SLC4A11	0.43562	3.7179e-21
PTK6	CSDC2	-0.058217	0.2305
PTK6	GOLGA8M	0.027256	0.57479
PTK6	C9orf16	0.1843	0.00013043
PTK6	C1orf116	0.49945	2.933e-28
PTK6	RHBG	-0.0757	0.11874
PTK6	OCIAD2	0.042307	0.38374
PTK6	RHPN1	0.32487	6.2895e-12
PTK6	CSPG5	-0.054431	0.2623
PTK6	NMU	-0.073835	0.12813
PTK6	RRN3P1	-0.12829	0.0080245
PTK6	BCL11A	-0.094477	0.051343
PTK6	MTFR2	-0.076027	0.11715
PTK6	FOXQ1	0.19988	3.2489e-05
PTK6	SLC1A7	0.068269	0.15956
PTK6	MTMR11	-0.05296	0.27543
PTK6	TSPAN1	0.19944	3.3836e-05
PTK6	PSENEN	-0.001591	0.97388
PTK6	CCDC167	-0.23997	5.3919e-07
PTK6	RP11-640N20.4	-0.057595	0.23552
PTK6	LYPD1	-0.04833	0.31965
PTK6	RTKN	0.037644	0.43837
PTK6	ADAMTS9-AS2	-0.11277	0.019905
PTK6	KRT23	0.26861	1.7853e-08
PTK6	SGPP2	0.16603	0.00058035
PTK6	GAPDH	-0.090507	0.061986
PTK6	ITGB6	0.33987	5.5979e-13
PTK6	GSTM5	0.078274	0.10668
PTK6	C6orf223	0.091008	0.060552
PTK6	RTKN2	-0.30128	2.1788e-10
PTK6	PRSS22	0.27804	5.3032e-09
PTK6	HTR3A	0.2513	1.471e-07
PTK6	LYPD6	-0.1628	0.00074415
PTK6	WHAMMP3	0.12354	0.010707
PTK6	S100A11	0.33105	2.3602e-12
PTK6	PDZK1IP1	0.35371	5.3251e-14
PTK6	CACNA1H	0.12374	0.01058
PTK6	TYMS	-0.28198	3.1507e-09
PTK6	ADM2	0.21914	4.985e-06
PTK6	SLC25A27	-0.17808	0.00022045
PTK6	UNC5B-AS1	0.2173	6.0128e-06
PTK6	RP11-680F8.1	-0.13736	0.0045091
PTK6	B3GNT3	0.47634	1.6323e-25
PTK6	PPP1R12B	0.022579	0.64214
PTK6	ATG16L2	0.17831	0.00021627
PTK6	RAB25	0.34747	1.5596e-13
PTK6	RP4-742C19.13	0.19251	6.3568e-05
PTK6	LCN2	0.42931	1.5636e-20
PTK6	C4BPB	0.06213	0.20061
PTK6	SFN	0.39788	1.3044e-17
PTK6	APBB3	0.085831	0.076796
PTK6	UGT2B7	0.12172	0.011931
PTK6	MCF2	-0.030454	0.53075
PTK6	DNAJC22	-0.17486	0.00028735
PTK6	HSPD1P11	-0.0016439	0.97301
PTK6	SCML1	0.053002	0.27505
PTK6	GALNT6	-0.0092881	0.84841
PTK6	KRT17	0.047411	0.32895
PTK6	XXbac-BPGBPG55C20.2	-0.083822	0.083982
PTK6	RP11-1212A22.4	0.01986	0.68273
PTK6	GPR39	0.20547	1.9194e-05
PTK6	ERBB4	-0.034938	0.47202
PTK6	C11orf96	0.03911	0.42072
PTK6	ABHD17C	0.22154	3.9001e-06
PTK6	GPRIN1	0.083892	0.083725
PTK6	TMPRSS4	0.39416	2.7632e-17
PTK6	NIPAL1	-0.013025	0.78865
PTK6	EGFL8	-0.097286	0.044768
PTK6	CTC-439O9.1	0.049083	0.31216
PTK6	WIPF3	-0.22004	4.5493e-06
PTK6	SH3BP5-AS1	0.064694	0.18262
PTK6	RP11-7K24.3	0.2382	6.5704e-07
PTK6	TRIM29	0.41079	8.9692e-19
PTK6	PRDM5	-0.18951	8.298e-05
PTK6	ZNF577	-0.13313	0.0059244
PTK6	KANK2	-0.027902	0.56576
PTK6	GOLGA6L17P	0.0002979	0.99511
PTK6	KLF9	0.17036	0.00041288
PTK6	OASL	0.037875	0.43555
PTK6	GRHL3	0.18414	0.00013227
PTK6	ZBED2	0.20701	1.6566e-05
PTK6	PLEKHH2	-0.11807	0.014752
PTK6	AP1S3	0.026153	0.59037
PTK6	MRPL14	-0.063381	0.19168
PTK6	FAM84B	0.1204	0.012887
PTK6	GPR78	0.17146	0.00037832
PTK6	RP11-22C11.2	0.085228	0.078899
PTK6	CNTNAP1	0.014496	0.76545
PTK6	PLEKHB1	-0.14182	0.0033532
PTK6	GSG2	-0.19874	3.6084e-05
PTK6	CCDC58	-0.11793	0.014872
PTK6	CASP9	-0.11116	0.02175
PTK6	RP11-256I23.2	-0.14192	0.0033298
PTK6	CDH6	0.063684	0.18956
PTK6	TTC39A	0.033964	0.48446
PTK6	SLC25A10	0.15872	0.0010121
PTK6	TRPM2-AS	0.2255	2.5863e-06
PTK6	CKMT1B	0.31041	5.7381e-11
PTK6	CTH	-0.10152	0.036212
PTK6	E2F7	-0.24055	5.054e-07
PTK6	UPK1B	0.19852	3.6833e-05
PTK6	IDH2	0.026722	0.58231
PTK6	PDE7B	0.021454	0.65881
PTK6	TNFSF15	0.2143	8.1201e-06
PTK6	ITPR1	-0.030265	0.53331
PTK6	CCDC183	-0.054975	0.25755
PTK6	TTC14	0.00035549	0.99416
PTK6	NCAPD2	-0.37805	6.3748e-16
PTK6	SCN7A	0.012374	0.79898
PTK6	KLK6	0.20841	1.4472e-05
PTK6	PMAIP1	0.043606	0.36929
PTK6	HERC2P9	0.077925	0.10826
PTK6	PEAR1	0.00012436	0.99796
PTK6	ATP8A1	0.028344	0.55962
PTK6	CDCA4	-0.13477	0.005332
PTK6	KLK11	0.26386	3.2327e-08
PTK6	PNISR	-0.1393	0.0039685
PTK6	SYNE4	0.074869	0.12285
PTK6	PAK6	0.21702	6.1848e-06
PTK6	TNFRSF12A	0.060605	0.2119
PTK6	RP11-283G6.4	0.10027	0.038575
PTK6	AIM1L	0.18598	0.00011287
PTK6	RP11-1149O23.3	0.082075	0.090669
PTK6	RP11-303E16.2	0.0092318	0.84932
PTK6	RP11-295G20.2	0.026565	0.58453
PTK6	STXBP5L	-0.21291	9.3215e-06
PTK6	RP11-126K1.8	0.034261	0.48065
PTK6	CAPG	0.27052	1.401e-08
PTK6	RP11-85K15.3	0.13153	0.0065562
PTK6	TTC9	0.34099	4.6446e-13
PTK6	ORC6	-0.23849	6.3615e-07
PTK6	MREG	0.070398	0.14691
PTK6	CIT	-0.19924	3.447e-05
PTK6	GPX1	0.18282	0.00014802
PTK6	CENPU	-0.21918	4.969e-06
PTK6	OXER1	-0.12982	0.007297
PTK6	CCNF	-0.29337	6.6727e-10
PTK6	RP11-469H8.6	-0.0085751	0.85992
PTK6	CTSV	-0.027739	0.56804
PTK6	MYO15B	0.11789	0.014907
PTK6	RP3-416H24.1	0.31953	1.4434e-11
PTK6	ATP5J2	0.059628	0.21938
PTK6	EXOSC4	0.1855	0.00011764
PTK6	CTD-2373N4.3	0.040432	0.40519
PTK6	LINC00924	0.017508	0.71861
PTK6	YPEL4	-0.072186	0.13689
PTK6	ENGASE	0.34955	1.0928e-13
PTK6	RP11-182J1.12	0.096027	0.047622
PTK6	SRD5A3	0.094053	0.0524
PTK6	RP11-258C19.7	0.022747	0.63966
PTK6	KCTD7	-0.025659	0.59741
PTK6	HN1	0.050351	0.29981
PTK6	PITPNM2	0.15561	0.0012734
PTK6	TDRD10	-0.10419	0.031548
PTK6	PERP	0.19118	7.1578e-05
PTK6	VLDLR	-0.018052	0.71025
PTK6	CRABP1	-0.16304	0.00073053
PTK6	NR2F2	-0.10918	0.024226
PTK6	TMEM45B	0.086812	0.073471
PTK6	CTD-3092A11.2	0.12057	0.012761
PTK6	TRPC1	-0.14732	0.0023016
PTK6	GYLTL1B	-0.058956	0.22463
PTK6	PNOC	-0.0268	0.58121
PTK6	IFFO1	0.24248	4.0673e-07
PTK6	BOLA2B	-0.015327	0.75243
PTK6	ERP27	0.049927	0.3039
PTK6	MMEL1	0.28273	2.8528e-09
PTK6	TMEM189-UBE2V1	-0.042767	0.37858
PTK6	PTCH2	-0.19187	6.7284e-05
PTK6	ST6GAL1	0.022867	0.63789
PTK6	NUSAP1	-0.17873	0.00020882
PTK6	WNT7B	0.298	3.4812e-10
PTK6	LRRC70	-0.045787	0.34581
PTK6	FOXI3	-0.26878	1.7471e-08
PTK6	AC012123.1	0.015694	0.74671
PTK6	FAM72D	-0.10723	0.026891
PTK6	RP11-615I2.2	-0.10324	0.033148
PTK6	IL1RN	0.31251	4.1928e-11
PTK6	OIP5	-0.16716	0.00053135
PTK6	BBOX1	0.16821	0.00048942
PTK6	COL16A1	0.14158	0.0034084
PTK6	CPED1	0.087672	0.070655
PTK6	LEMD1	0.1138	0.018792
PTK6	SNX29P2	-0.0019558	0.9679
PTK6	RP5-1120P11.1	-0.12033	0.012945
PTK6	RAP1GAP	0.13228	0.0062518
PTK6	HOXB4	0.088704	0.06739
PTK6	MPZL3	0.12309	0.011001
PTK6	FBXO16	-0.13643	0.0047889
PTK6	GALNT14	0.19954	3.3525e-05
PTK6	SYTL1	0.35267	6.3824e-14
PTK6	ZNF83	0.15974	0.00093742
PTK6	CENPE	-0.13991	0.003811
PTK6	DNAAF3	0.011414	0.81428
PTK6	PLK4	-0.18537	0.00011898
PTK6	BMP7	-0.24857	2.0231e-07
PTK6	RP11-97O12.6	0.073528	0.12972
PTK6	PADI2	0.30147	2.1205e-10
PTK6	SLC9A2	0.24626	2.642e-07
PTK6	ABCA5	0.08081	0.095769
PTK6	CKMT1A	0.30896	7.1086e-11
PTK6	HIST1H4C	-0.26276	3.7033e-08
PTK6	SHCBP1	0.013392	0.78285
PTK6	DPY19L2	-0.16005	0.00091621
PTK6	RMRP	-0.0672	0.16621
PTK6	PSD3	-0.11948	0.013598
PTK6	INHA	-0.13949	0.0039173
PTK6	NFATC4	-0.098606	0.041933
PTK6	POU2F3	0.24581	2.7814e-07
PTK6	ST13P15	0.094155	0.052144
PTK6	CTA-363E19.2	0.080646	0.096446
PTK6	AP000251.3	-0.062914	0.19498
PTK6	SPDEF	0.10383	0.032146
PTK6	RAB42	0.067935	0.16162
PTK6	KLHL35	0.064254	0.18562
PTK6	GGH	-0.19852	3.6837e-05
PTK6	IFI30	0.20401	2.206e-05
PTK6	LEMD1-AS1	0.05961	0.21952
PTK6	FBXL16	0.28835	1.3331e-09
PTK6	CTC-428H11.2	0.065906	0.17454
PTK6	FAM72B	-0.17203	0.00036118
PTK6	CDR2L	0.29167	8.4456e-10
PTK6	ACADL	0.085961	0.076346
PTK6	PRKCZ	0.068325	0.15921
PTK6	AGPAT9	0.21122	1.1002e-05
PTK6	RP11-465B22.8	0.17641	0.00025306
PTK6	ISG15	0.0031226	0.94876
PTK6	ZMAT1	0.031231	0.52031
PTK6	UBXN8	-0.069985	0.1493
PTK6	KIF24	-0.24982	1.7494e-07
PTK6	RPL41P2	-0.00058764	0.99035
PTK6	NCEH1	0.13107	0.0067467
PTK6	NEAT1_2	0.033332	0.49263
PTK6	FAM83A	0.19746	4.0594e-05
PTK6	FCHO1	0.15262	0.0015809
PTK6	AOC1	0.16087	0.0008612
PTK6	CTB-12A17.2	0.027165	0.57607
PTK6	AC137932.4	0.12881	0.0077721
PTK6	RP11-250B2.5	-0.10532	0.029748
PTK6	RP4-800G7.2	0.013347	0.78357
PTK6	LINC00115	-0.016571	0.73307
PTK6	CXCL11	0.076669	0.11408
PTK6	MYO3B	0.085074	0.079443
PTK6	NRK	-0.017666	0.71616
PTK6	GRAMD2	0.099972	0.03916
PTK6	H3F3AP4	-0.17905	0.00020344
PTK6	TRIM59	0.10522	0.029906
PTK6	FRMPD1	-0.10721	0.026922
PTK6	RAC1P2	0.12209	0.011673
PTK6	UBD	0.088565	0.067822
PTK6	NPIPA1	-0.017019	0.72614
PTK6	CXCL10	0.035455	0.46548
PTK6	DAPL1	-0.052699	0.27781
PTK6	GOLT1A	0.20408	2.1901e-05
PTK6	KRT86	0.13234	0.0062272
PTK6	GPR19	-0.3407	4.8729e-13
PTK6	LINC00284	0.24281	3.9178e-07
PTK6	2025-09-03	-0.056212	0.24698
PTK6	RP11-87H9.4	0.020732	0.6696
PTK6	SOWAHB	0.14306	0.0030833
PTK6	RAB3IP	-0.16785	0.00050348
PTK6	F3	0.1955	4.8561e-05
PTK6	LIX1	0.068368	0.15895
PTK6	LA16c-380H5.5	0.0068263	0.88828
PTK6	RP11-325K4.2	0.18595	0.00011323
PTK6	CRB2	-0.013881	0.77513
PTK6	RP11-540B6.6	0.15082	0.0017991
PTK6	PALM3	0.03437	0.47925
PTK6	ACSM3	-0.19849	3.692e-05
PTK6	CNFN	0.21586	6.9479e-06
PTK6	NFKBIE	0.12253	0.011369
PTK6	GSTM2	-0.18661	0.00010688
PTK6	RHOF	0.34975	1.0558e-13
PTK6	TRIM58	-0.093549	0.053684
PTK6	KLK5	0.1078	0.026082
PTK6	IFI27	0.062233	0.19986
PTK6	RP11-354K4.2	-0.022265	0.64677
PTK6	BRCC3P1	-0.011925	0.80613
PTK6	TMEM30B	0.18477	0.00012528
PTK6	MT-RNR1	0.14582	0.0025529
PTK6	ANO9	0.24662	2.5341e-07
PTK6	RP11-616M22.11	0.041136	0.39705
PTK6	ELMO3	0.34013	5.3633e-13
PTK6	FA2H	0.086804	0.073498
PTK6	DST	0.014902	0.75908
PTK6	PRSS53	0.11477	0.017805
PTK6	AGMAT	-0.012911	0.79047
PTK6	KRT19	0.36	1.7611e-14
PTK6	CMTM6	0.12907	0.007644
PTK6	PBX3	0.039061	0.42132
PTK6	SLFN13	-0.14245	0.0032142
PTK6	F8A1	0.2315	1.3671e-06
PTK6	PI4KAP2	-0.0078284	0.87201
PTK6	CLDN10	0.12369	0.010609
PTK6	PTH2R	-0.12224	0.011568
PTK6	ORC1	-0.22954	1.6862e-06
PTK6	FAM3B	0.17155	0.00037534
PTK6	GHc-857G6.7	0.034986	0.4714
PTK6	JAM3	-0.0091521	0.85061
PTK6	RP11-597D13.7	0.11669	0.015971
PTK6	NAV3	-0.049187	0.31113
PTK6	OVOL1	0.22844	1.8948e-06
PTK6	CORO6	0.13235	0.0062264
PTK6	HOMER2	0.085153	0.079164
PTK6	LACTB2	0.1494	0.0019895
PTK6	C15orf48	0.17218	0.00035702
PTK6	CEP290	-0.1653	0.00061421
PTK6	CTB-50L17.9	0.057584	0.23562
PTK6	DNAJB13	0.12484	0.0099025
PTK6	CTD-2036P10.6	-0.031585	0.5156
PTK6	BCYRN1	-0.30249	1.8304e-10
PTK6	GOLGA8B	0.067621	0.16357
PTK6	STAMBPL1	0.13114	0.0067206
PTK6	AC245100.1	-0.070272	0.14763
PTK6	PRDM8	0.13346	0.0058016
PTK6	AC093642.1	-0.0040106	0.93422
PTK6	CTB-55O6.8	0.13922	0.0039883
PTK6	PRR19	-0.094294	0.051797
PTK6	P2RY6	0.40197	5.6583e-18
PTK6	ARHGAP39	0.18429	0.00013054
PTK6	RP11-736N17.4	0.045056	0.35357
PTK6	CCNL2	0.010405	0.83044
PTK6	IKBKE	0.27435	8.5739e-09
PTK6	CHD7	-0.125	0.0098056
PTK6	TFAP2A	0.070348	0.1472
PTK6	TSTA3	0.33149	2.1994e-12
PTK6	DNM1P47	0.071269	0.14196
PTK6	RP11-109J4.1	0.11909	0.013909
PTK6	TRPM3	-0.22882	1.8205e-06
PTK6	AC079779.4	-0.093722	0.05324
PTK6	SEMA3F	-0.041278	0.39542
PTK6	CLIC3	0.22558	2.565e-06
PTK6	CITED4	0.15716	0.001136
PTK6	CXCL17	0.32701	4.4924e-12
PTK6	RP11-388C12.8	0.054248	0.26391
PTK6	XDH	0.36396	8.6527e-15
PTK6	PITPNM1	0.19412	5.5016e-05
PTK6	APOBEC3B	-0.014002	0.77322
PTK6	VEPH1	-0.011746	0.80899
PTK6	CHST6	0.20647	1.7447e-05
PTK6	FANCA	-0.08516	0.079139
PTK6	CROCCP3	-0.064292	0.18536
PTK6	GALNT15	0.10192	0.035468
PTK6	SDC1	0.040022	0.40997
PTK6	CCDC36	-0.004385	0.9281
PTK6	CST1	-0.12579	0.009352
PTK6	RASSF10	-0.16272	0.00074836
PTK6	TNF	0.2178	5.7137e-06
PTK6	RP11-356I2.4	0.055523	0.25283
PTK6	RP3-402G11.28	0.14203	0.0033064
PTK6	JMJD7-PLA2G4B	0.065955	0.17422
PTK6	IGFBP4	-0.040565	0.40365
PTK6	GOLGA8S	-0.028092	0.56311
PTK6	MAPK11	0.2803	3.9387e-09
PTK6	CHRD	0.068276	0.15952
PTK6	RAB3D	0.26644	2.3442e-08
PTK6	S100A2	0.28949	1.1404e-09
PTK6	ANTXR2	0.12533	0.0096149
PTK6	DEFB1	0.24466	3.1757e-07
PTK6	PI3	0.2166	6.451e-06
PTK6	MSL3P1	-0.05421	0.26424
PTK6	C2orf54	0.1339	0.0056411
PTK6	CD74	0.29875	3.1305e-10
PTK6	TTC30A	-0.21764	5.8052e-06
PTK6	RORA	0.085968	0.076325
PTK6	STAR	-0.021927	0.65178
PTK6	ACBD7	-0.30975	6.3262e-11
PTK6	ZNF10	-0.27653	6.4666e-09
PTK6	CGN	0.17808	0.00022048
PTK6	C12orf56	-0.11819	0.014656
PTK6	LMOD1	0.015721	0.74629
PTK6	RP4-669P10.20	0.021666	0.65565
PTK6	PPP1R14C	-0.025495	0.59976
PTK6	RP11-454E5.4	-0.25282	1.2295e-07
PTK6	GPT2	-0.30279	1.7529e-10
PTK6	TRAF1	0.2499	1.7324e-07
PTK6	NPW	-0.096635	0.046224
PTK6	LYN	0.34868	1.2696e-13
PTK6	AC025165.8	-0.17418	0.00030361
PTK6	CAPN3	0.17426	0.00030162
PTK6	TSPAN5	-0.055338	0.25442
PTK6	RP11-446H18.1	-0.074193	0.12628
PTK6	MEF2C-AS1	0.039962	0.41067
PTK6	CLGN	-0.082884	0.087521
PTK6	RP11-681H18.2	-0.02526	0.60313
PTK6	RASEF	0.11849	0.014402
PTK6	TSHZ3	0.12295	0.011089
PTK6	E2F1	-0.20515	1.9791e-05
PTK6	CYP2J2	0.10126	0.036693
PTK6	USP18	-0.10858	0.025015
PTK6	PCDH1	0.26395	3.1974e-08
PTK6	CFB	0.25614	8.2841e-08
PTK6	PDGFRA	0.079098	0.10303
PTK6	RP11-465N4.4	0.19239	6.425e-05
PTK6	HS3ST1	0.054314	0.26333
PTK6	ADAMTS1	0.1579	0.0010758
PTK6	ALPL	-0.22102	4.1173e-06
PTK6	RP11-578F21.6	0.098038	0.043133
PTK6	LPAR3	-0.097215	0.044925
PTK6	SNX10	0.063635	0.1899
PTK6	SLC9A3R1	0.11752	0.015233
PTK6	FUT1	-0.081545	0.092779
PTK6	VDR	0.32524	5.9426e-12
PTK6	RP11-446H18.5	-0.13949	0.0039173
PTK6	RP11-522B15.3	0.043605	0.36931
PTK6	DENND1C	0.22851	1.8824e-06
PTK6	NXPH3	-0.020244	0.67693
PTK6	SLC2A1	0.039932	0.41102
PTK6	RP11-228B15.4	0.16139	0.00082833
PTK6	PHOX2A	-0.11425	0.018327
PTK6	MTUS1	0.1486	0.0021046
PTK6	RP11-553L6.5	0.095647	0.048512
PTK6	C9orf72	-0.2511	1.5065e-07
PTK6	CNRIP1	0.073756	0.12853
PTK6	NDUFS8	0.098206	0.042775
PTK6	CRIP1	0.20104	2.9147e-05
PTK6	KLHDC7B	0.14983	0.0019288
PTK6	ANKRD36	0.0067212	0.88999
PTK6	LINC00899	0.18314	0.00014413
PTK6	GAL3ST2	0.32029	1.2847e-11
PTK6	WISP2	0.09058	0.061776
PTK6	IFI6	-0.099758	0.039583
PTK6	AC005083.1	0.098109	0.042983
PTK6	ADORA1	0.096114	0.047419
PTK6	C1orf233	0.27828	5.1421e-09
PTK6	RPS4Y1	0.10544	0.029558
PTK6	LINC00891	0.036146	0.45682
PTK6	TDO2	0.10658	0.027833
PTK6	TNS2	0.12545	0.0095453
PTK6	NUPR1L	-0.15019	0.0018804
PTK6	BHLHE41	0.0829	0.08746
PTK6	C2CD4D	0.0050334	0.9175
PTK6	DUSP26	-0.26027	5.0257e-08
PTK6	LINC00665	-0.20779	1.5357e-05
PTK6	KLRG2	0.080728	0.096107
PTK6	OAS2	0.043483	0.37065
PTK6	CTD-2044J15.1	0.15754	0.0011047
PTK6	NOSTRIN	0.13882	0.0040963
PTK6	ATP2B2	0.057416	0.23699
PTK6	TONSL	0.12736	0.0084985
PTK6	H2AFX	-0.11346	0.019161
PTK6	RBM38	-0.10519	0.02995
PTK6	SCGB1D2	0.024077	0.62021
PTK6	RP11-651P23.4	-0.096363	0.046845
PTK6	ADGRF1	0.22132	3.9913e-06
PTK6	HES2	0.19758	4.0145e-05
PTK6	VLDLR-AS1	-0.047952	0.32346
PTK6	UNC5A	0.20708	1.6456e-05
PTK6	RP11-616M22.12	0.017958	0.71169
PTK6	RP11-632K20.7	0.059327	0.22172
PTK6	PTPN3	0.17792	0.00022339
PTK6	SIGLEC11	-0.0045212	0.92587
PTK6	RASL11B	-0.26302	3.5892e-08
PTK6	CTD-2536I1.2	-0.16726	0.00052723
PTK6	KDELR3	0.27954	4.3547e-09
PTK6	LRRN2	-0.17736	0.00023412
PTK6	GINS4	-0.22122	4.0329e-06
PTK6	NFIL3	0.019396	0.68975
PTK6	EXPH5	0.18166	0.00016332
PTK6	NHLRC1	-0.1001	0.038911
PTK6	ADAMTS9-AS1	-0.13472	0.0053493
PTK6	SLC22A3	0.038578	0.42708
PTK6	CDCA7	-0.25731	7.1937e-08
PTK6	FGF2	-0.09988	0.039342
PTK6	RP11-693N9.2	0.083175	0.086409
PTK6	C4orf19	0.021587	0.65683
PTK6	SPINT2	0.079099	0.10303
PTK6	KLC3	0.13815	0.0042802
PTK6	ST6GALNAC2	0.092682	0.055949
PTK6	RP11-613D13.8	0.051189	0.29183
PTK6	RP11-250B2.3	-0.059691	0.21889
PTK6	MPPED2	-0.12298	0.011071
PTK6	MIR4435-2HG	0.16439	0.00065867
PTK6	FAM156A	0.07802	0.10783
PTK6	DLG2	-0.041834	0.38908
PTK6	HRASLS	0.082943	0.087295
PTK6	ICA1	0.11587	0.016731
PTK6	WDR27	-0.18603	0.00011243
PTK6	ANKRD23	0.022799	0.6389
PTK6	NCK1-AS1	0.039793	0.41266
PTK6	RAPGEF4	-0.20686	1.6808e-05
PTK6	RP1-253P7.4	0.083185	0.086372
PTK6	ZCCHC18	-0.40489	3.0944e-18
PTK6	KLF15	-0.20579	1.8621e-05
PTK6	MEG9	-0.086723	0.073767
PTK6	TRPC4	-0.069409	0.15269
PTK6	RP11-9E17.1	-0.010141	0.83468
PTK6	HSD11B1	-0.025479	0.59998
PTK6	BCL2L14	0.059753	0.21841
PTK6	ZNF483	-0.17795	0.00022288
PTK6	SH2B2	0.040923	0.3995
PTK6	RP11-43N16.4	0.1847	0.00012608
PTK6	RP4-797C5.2	0.3232	8.1727e-12
PTK6	CTD-2104P17.1	-0.12675	0.008817
PTK6	ARPC1B	0.3608	1.5258e-14
PTK6	ESR2	0.077007	0.11249
PTK6	CCBE1	-0.021537	0.65758
PTK6	MAPK12	0.15773	0.0010893
PTK6	WHAMMP2	0.086542	0.074373
PTK6	UBAP1L	0.13159	0.0065301
PTK6	LINC01197	-0.17919	0.00020103
PTK6	DBNDD1	-0.026706	0.58253
PTK6	RAB9B	-0.25068	1.5829e-07
PTK6	RP11-793H13.10	0.15262	0.0015818
PTK6	H1FNT	0.04623	0.34116
PTK6	COX5A	0.16115	0.00084318
PTK6	MIF	0.017962	0.71163
PTK6	PHYHIP	-0.059397	0.22117
PTK6	ARHGAP6	0.079714	0.10037
PTK6	RPPH1	0.0048255	0.9209
PTK6	AC092641.2	0.071953	0.13817
PTK6	AHSA2	0.098811	0.041507
PTK6	ANG	-0.11225	0.020488
PTK6	RP11-98D18.9	-0.063901	0.18805
PTK6	COX5B	-0.044583	0.35865
PTK6	LENG8	0.18819	9.3158e-05
PTK6	RBM5-AS1	0.09611	0.047429
PTK6	CXCR4	-0.11585	0.016753
PTK6	GNRH1	0.067278	0.16572
PTK6	RP11-395N3.1	0.01425	0.76932
PTK6	GNA14	0.029581	0.5426
PTK6	U47924.27	0.097516	0.044263
PTK6	CLSTN2	0.055731	0.25106
PTK6	RP11-212I21.4	0.14177	0.0033636
PTK6	C11orf52	0.268	1.9277e-08
PTK6	SLC9A4	0.10861	0.024975
PTK6	RP5-855D21.3	-0.00040031	0.99343
PTK6	PEG3	-0.062619	0.19708
PTK6	ERCC6L	-0.20577	1.8651e-05
PTK6	SMG1P7	-0.020013	0.68043
PTK6	RP11-759A24.2	0.0066999	0.89034
PTK6	GINS2	-0.18675	0.00010561
PTK6	GLOD5	0.16619	0.00057307
PTK6	NDUFB9	0.14695	0.0023601
PTK6	RNASEH2A	-0.20087	2.9632e-05
PTK6	FAM189A2	0.078817	0.10426
PTK6	ITM2A	-0.082383	0.089461
PTK6	ANKRD29	0.062488	0.19803
PTK6	ST3GAL4	0.093155	0.054704
PTK6	CTA-268H5.14	0.023472	0.62902
PTK6	SERPINA10	-0.11316	0.019483
PTK6	OLR1	0.21738	5.9606e-06
PTK6	MT1G	0.086707	0.07382
PTK6	DIRAS2	0.11762	0.015144
PTK6	IDO1	0.23072	1.4855e-06
PTK6	SEC31B	0.11245	0.020256
PTK6	RTP4	0.1687	0.00047086
PTK6	MPP7	0.0031368	0.94853
PTK6	RASGRF2	0.10936	0.023991
PTK6	UBE2S	-0.05483	0.25881
PTK6	TNFAIP8L3	0.068399	0.15877
PTK6	FNDC4	-0.053266	0.27267
PTK6	RP11-755F10.3	-0.0072242	0.88181
PTK6	FTCDNL1	0.14128	0.0034769
PTK6	URAHP	0.014767	0.7612
PTK6	CACNA1B	-0.017107	0.72478
PTK6	ADGRG2	-0.0781	0.10747
PTK6	OBSL1	-0.23027	1.5595e-06
PTK6	PKIB	0.13024	0.0071109
PTK6	KCNS1	0.02043	0.67413
PTK6	LY6E	0.16274	0.00074721
PTK6	COL23A1	0.12621	0.0091121
PTK6	HLA-DRA	0.23934	5.7858e-07
PTK6	RP5-1024G6.5	0.014721	0.76192
PTK6	GOLGA8A	0.02292	0.63711
PTK6	RP11-867G23.1	-0.0046037	0.92452
PTK6	IL1RAP	0.19763	3.9957e-05
PTK6	NPTN-IT1	0.08097	0.095109
PTK6	PRCD	-0.070658	0.14542
PTK6	LINC01554	0.010785	0.82434
PTK6	HCAR1	0.038435	0.4288
PTK6	CTC-260E6.4	-0.26432	3.0534e-08
PTK6	RP11-774O3.3	-0.082948	0.087276
PTK6	TGFA	0.32541	5.7809e-12
PTK6	MIR3648-1	-0.012856	0.79134
PTK6	MIR3648-2	-0.012856	0.79134
PTK6	GJB2	0.19274	6.2265e-05
PTK6	TEAD4	0.035867	0.4603
PTK6	SLC5A1	0.15006	0.0018981
PTK6	SLC28A3	0.31476	2.986e-11
PTK6	ZSWIM4	0.016626	0.73222
PTK6	OR5K2	0.023715	0.62548
PTK6	AP000473.8	-0.013716	0.77774
PTK6	ELOVL7	0.016499	0.73419
PTK6	LY75	0.20883	1.3892e-05
PTK6	PYCR1	0.094506	0.051271
PTK6	CTD-2311M21.3	-0.0038302	0.93717
PTK6	FAT2	0.22816	1.9536e-06
PTK6	SUPT20HL1	0.063198	0.19296
PTK6	RP11-182J1.14	-0.035737	0.46193
PTK6	COX6B1	-0.0016297	0.97325
PTK6	RP11-74M13.4	-0.089522	0.064892
PTK6	RORC	0.2497	1.7735e-07
PTK6	FOLR3	0.23949	5.692e-07
PTK6	CCL26	0.046414	0.33923
PTK6	UPK3B	0.23225	1.2606e-06
PTK6	ESM1	-0.14971	0.0019464
PTK6	FHDC1	-0.0030364	0.95018
PTK6	RP11-400F19.18	0.024942	0.6077
PTK6	NAT8L	-0.20762	1.5622e-05
PTK6	RP11-256I23.1	-0.040682	0.40228
PTK6	SNORA73A	-0.037504	0.44007
PTK6	UBXN10	-0.018399	0.70494
PTK6	GABARAPL1	-0.063513	0.19075
PTK6	RP11-321P16.1	0.034597	0.47635
PTK6	AC009237.8	-0.11068	0.022334
PTK6	BOLA3	0.016705	0.73099
PTK6	RP11-608O21.1	-0.092525	0.056368
PTK6	HUNK	-0.031441	0.51752
PTK6	CTC-250I14.3	-0.033758	0.48711
PTK6	RP11-73M18.6	0.094238	0.051935
PTK6	SPARCL1	-0.03089	0.52488
PTK6	DSG2	-0.099742	0.039616
PTK6	EDN2	-0.08694	0.073045
PTK6	RP11-197N18.2	-0.053873	0.26723
PTK6	FOXA2	-0.10832	0.025364
PTK6	UCA1	0.37202	1.9782e-15
PTK6	PODN	0.043193	0.37385
PTK6	NR4A1	0.077116	0.11198
PTK6	DYDC2	-0.079477	0.10139
PTK6	RNF112	-0.083922	0.083612
PTK6	RP11-373D23.2	0.11463	0.017942
PTK6	RP11-243M5.2	-0.033519	0.49021
PTK6	CTHRC1	0.020608	0.67146
PTK6	ACSM1	0.0043837	0.92812
PTK6	RMI2	-0.25303	1.2004e-07
PTK6	LRRK2	0.16003	0.00091722
PTK6	RP11-259P15.4	0.017949	0.71183
PTK6	RP11-3B7.1	-0.0094534	0.84575
PTK6	RP11-45A17.4	0.053791	0.26796
PTK6	RP11-448G15.3	0.16851	0.00047815
PTK6	RAB11FIP4	-0.18434	0.00012998
PTK6	GALNT3	0.11661	0.016039
PTK6	RP3-333H23.9	0.036795	0.44877
PTK6	FHL5	0.0046095	0.92443
PTK6	AC241585.2	-0.061291	0.20677
PTK6	NR1D1	0.20392	2.2249e-05
PTK6	SEMA6A-AS1	-0.020193	0.67771
PTK6	ARNTL2	-0.092122	0.057456
PTK6	FAM132B	0.15382	0.0014507
PTK6	PIWIL2	0.01855	0.70263
PTK6	MPDZ	-0.36914	3.3653e-15
PTK6	GPR37	0.0087039	0.85784
PTK6	TMC6	0.31006	6.0445e-11
PTK6	TYROBP	0.16526	0.0006159
PTK6	AOX1	-0.047246	0.33065
PTK6	NRTN	-0.057118	0.23944
PTK6	LINC00342	0.13739	0.0044984
PTK6	DOCK10	0.19788	3.9049e-05
PTK6	SYT12	0.096988	0.04543
PTK6	RP11-645C24.5	-0.051164	0.29207
PTK6	NUDT14	0.077685	0.10935
PTK6	C19orf81	0.12343	0.010774
PTK6	BARX2	-0.025767	0.59588
PTK6	GRHL1	0.22705	2.1953e-06
PTK6	C4orf48	-0.13717	0.0045642
PTK6	HPDL	-0.22099	4.1268e-06
PTK6	HIST1H3G	-0.049168	0.31132
PTK6	WDR62	-0.081915	0.0913
PTK6	TSPAN12	0.30328	1.6322e-10
PTK6	PRRT1	-0.16531	0.00061366
PTK6	STC2	0.025319	0.60229
PTK6	TAS2R20	-0.10943	0.023895
PTK6	MORF4L2-AS1	-0.015339	0.75225
PTK6	FAM103A2P	-0.055536	0.25272
PTK6	SGMS2	0.2996	2.7729e-10
PTK6	ZEB2	0.17355	0.00031963
PTK6	PAFAH1B3	-0.15154	0.0017086
PTK6	TRIB1	0.2065	1.7396e-05
PTK6	HAGLROS	-0.11065	0.02236
PTK6	TMC5	0.26736	2.0905e-08
PTK6	TSPAN13	-0.099376	0.040351
PTK6	PROSER2	0.1806	0.00017861
PTK6	PLEK2	0.21038	1.1954e-05
PTK6	DARS-AS1	0.1115	0.021353
PTK6	RALY-AS1	-0.028275	0.56057
PTK6	RP11-603J24.9	-0.027363	0.57329
PTK6	JHDM1D-AS1	0.25365	1.1145e-07
PTK6	TNXB	0.13059	0.0069556
PTK6	VWA1	0.25206	1.3448e-07
PTK6	RP5-855D21.1	0.011687	0.80993
PTK6	NOTUM	-0.16457	0.00064986
PTK6	HOXD1	0.0073006	0.88057
PTK6	STK17B	0.28825	1.3528e-09
PTK6	ALDH1L1	-0.19137	7.0355e-05
PTK6	ARMC3	-0.25186	1.3771e-07
PTK6	NEIL1	0.25252	1.2748e-07
PTK6	FAM72C	-0.20243	2.5606e-05
PTK6	PPAPDC1A	-0.097491	0.044318
PTK6	IGSF10	0.05082	0.29533
PTK6	AC007009.1	0.12077	0.012615
PTK6	IGSF3	-0.18182	0.00016115
PTK6	P2RY2	0.31233	4.3033e-11
PTK6	SLC30A2	-0.0010585	0.98262
PTK6	PROM2	0.39717	1.506e-17
PTK6	RHOBTB3	-0.1839	0.00013503
PTK6	JAKMIP3	0.2015	2.7932e-05
PTK6	RP11-524F11.1	-0.059034	0.22401
PTK6	LRRN4CL	-0.044994	0.35424
PTK6	RP11-390F4.6	-0.063219	0.19281
PTK6	SPATA9	0.066572	0.17021
PTK6	PLEKHN1	0.43036	1.2334e-20
PTK6	HAND2	-0.04825	0.32046
PTK6	MPZL2	0.27709	6.0076e-09
PTK6	ADD2	-0.18348	0.00013991
PTK6	SULT2B1	0.30027	2.5187e-10
PTK6	CRIP2	0.043581	0.36957
PTK6	ST13P3	0.056403	0.24538
PTK6	RP11-288H12.3	-0.064624	0.18309
PTK6	FAM72A	-0.10589	0.028873
PTK6	RP3-512B11.3	-0.27281	1.0453e-08
PTK6	NDRG2	-0.18829	9.2325e-05
PTK6	BACE2	0.28361	2.5351e-09
PTK6	RP11-510N19.5	0.26841	1.8319e-08
PTK6	RP11-73M7.6	0.12141	0.012147
PTK6	TSC22D3	-0.018854	0.69799
PTK6	CUBN	-0.088708	0.067377
PTK6	RP11-27G14.4	-0.071958	0.13814
PTK6	NRARP	-0.14226	0.003255
PTK6	RP11-96C23.13	0.12312	0.010981
PTK6	TMPRSS13	0.18758	9.8227e-05
PTK6	RP11-1299A16.3	-0.066193	0.17267
PTK6	KIT	-0.25055	1.6058e-07
PTK6	RIBC2	-0.10338	0.032918
PTK6	PRRX2	0.14053	0.0036559
PTK6	HOXB5	0.084532	0.081382
PTK6	ECM2	0.041182	0.39653
PTK6	TCEB1P19	0.044029	0.36466
PTK6	TNFRSF9	0.11738	0.015352
PTK6	RP11-800A3.4	0.26949	1.5983e-08
PTK6	ITGB7	0.42305	6.3297e-20
PTK6	IGFBP5	-0.2525	1.2772e-07
PTK6	GCNT1	-0.070208	0.14801
PTK6	RASSF9	-0.074843	0.12299
PTK6	MT1H	0.034408	0.47875
PTK6	ASCL2	-0.015127	0.75556
PTK6	PLA2R1	0.26105	4.5714e-08
PTK6	LGI4	-0.17866	0.00021015
PTK6	SERPINA1	0.40864	1.4108e-18
PTK6	RRP7BP	0.086891	0.073209
PTK6	C10orf95	0.14013	0.0037545
PTK6	FHL2	0.1311	0.0067364
PTK6	CNGB1	0.19417	5.4743e-05
PTK6	ARFGEF3	0.22959	1.6771e-06
PTK6	LRRC55	-0.099691	0.039718
PTK6	GPRIN2	-0.11075	0.022247
PTK6	AC006011.4	-0.091224	0.05994
PTK6	RP3-402G11.27	0.1215	0.012085
PTK6	RPL29P11	-0.015813	0.74485
PTK6	RP13-890H12.2	0.17078	0.00039929
PTK6	MIR503HG	-0.16814	0.00049195
PTK6	HOXB8	0.047602	0.327
PTK6	TPSG1	0.042838	0.37779
PTK6	CTB-50L17.8	0.15791	0.001075
PTK6	COX7B	0.078588	0.10528
PTK6	SCUBE1	-0.073273	0.13106
PTK6	RP1-92O14.3	0.011837	0.80753
PTK6	NR4A2	0.070922	0.14392
PTK6	AC019117.1	0.055622	0.25198
PTK6	AMN	0.29895	3.0386e-10
PTK6	CFAP126	-0.17531	0.00027704
PTK6	RP11-334A14.8	0.028985	0.55077
PTK6	NOS1AP	-0.012016	0.80468
PTK6	SCX	-0.020096	0.67916
PTK6	TRPM2	0.32274	8.7857e-12
PTK6	KLHDC8A	-0.11594	0.016666
PTK6	GAPDHP1	-0.018369	0.70539
PTK6	RTN4R	-0.063557	0.19044
PTK6	ICOSLG	0.27488	8.0036e-09
PTK6	RP11-1055B8.4	-0.03175	0.5134
PTK6	RBMS3	0.042746	0.37882
PTK6	PTAFR	0.39674	1.6428e-17
PTK6	LA16c-358B7.3	-0.059379	0.22131
PTK6	LIN7A	-0.0034476	0.94344
PTK6	SDS	0.074066	0.12693
PTK6	HOXB2	0.13584	0.0049775
PTK6	RP11-70D24.2	-0.022813	0.63868
PTK6	FRMPD3	-0.15648	0.0011947
PTK6	LINC01088	0.026071	0.59153
PTK6	AC005104.3	0.00604	0.90108
PTK6	RP11-475B2.1	0.069663	0.15119
PTK6	PDGFD	0.002317	0.96197
PTK6	NID1	0.0090666	0.85198
PTK6	LINC01229	-0.042099	0.38609
PTK6	GRIA3	0.071827	0.13886
PTK6	HIST1H2AG	-0.036625	0.45087
PTK6	CA2	0.13415	0.0055485
PTK6	HPN	-0.051943	0.28477
PTK6	RP11-212P7.3	-0.11235	0.020373
PTK6	U1	-0.074848	0.12296
PTK6	FAM153B	0.14726	0.0023112
PTK6	RNU1-2	-0.07389	0.12784
PTK6	RNU1-27P	-0.07389	0.12784
PTK6	RNU1-4	-0.07389	0.12784
PTK6	STON2	0.002364	0.9612
PTK6	AC005154.7	0.13775	0.0043957
PTK6	MAPK15	0.037728	0.43734
PTK6	RNFT2	-0.37168	2.107e-15
PTK6	GNG11	-0.033411	0.4916
PTK6	FAM198B	0.046126	0.34224
PTK6	RP11-347C12.10	0.07259	0.1347
PTK6	FAM83E	0.27043	1.4177e-08
PTK6	ROBO3	-0.056461	0.24489
PTK6	RP11-256I23.3	0.01263	0.79492
PTK6	POU5F1P3	0.1443	0.0028347
PTK6	APOC4-APOC2	0.17379	0.00031339
PTK6	RP11-64K12.8	0.002676	0.95608
PTK6	CHODL	0.077498	0.11021
PTK6	RP11-589M4.4	0.077212	0.11153
PTK6	ITGB4	0.4156	3.2084e-19
PTK6	CCL28	0.07841	0.10607
PTK6	CCDC116	0.10728	0.02682
PTK6	RP4-794I6.4	0.42304	6.3314e-20
PTK6	FGF22	0.075408	0.12017
PTK6	HOXB6	0.10642	0.028069
PTK6	COL9A2	-0.18595	0.00011319
PTK6	KLK13	0.26395	3.1977e-08
PTK6	CTD-2006M22.2	-0.01194	0.8059
PTK6	RUNX3	0.30169	2.0532e-10
PTK6	NDUFA7	-0.029367	0.54553
PTK6	RDM1	-0.16368	0.00069586
PTK6	SH2D3A	0.33359	1.5675e-12
PTK6	CTD-2010I16.1	0.048854	0.31443
PTK6	FAM53B-AS1	-0.05779	0.23395
PTK6	AVPI1	0.17618	0.000258
PTK6	RP3-329A5.8	-0.052507	0.27957
PTK6	RNU1-1	-0.07088	0.14415
PTK6	RNU1-28P	-0.07088	0.14415
PTK6	RNU1-3	-0.07088	0.14415
PTK6	RNVU1-18	-0.07088	0.14415
PTK6	CCDC88C	-0.019012	0.69558
PTK6	VWA2	-0.048942	0.31356
PTK6	TCF23	-0.033241	0.49381
PTK6	LILRB4	0.19418	5.4711e-05
PTK6	C6orf165	-0.2089	1.3799e-05
PTK6	MAOA	-0.19402	5.5508e-05
PTK6	RPL36AP43	-0.023875	0.62314
PTK6	LINC00152	0.10799	0.02582
PTK6	C9orf152	0.22172	3.8301e-06
PTK6	CTD-2020K17.4	0.053799	0.26789
PTK6	LINC00473	-0.15644	0.0011978
PTK6	MAGI2-AS3	-0.10088	0.037406
PTK6	CX3CR1	0.19222	6.5225e-05
PTK6	HERC2P2	0.021419	0.65933
PTK6	PROM1	-0.017387	0.72046
PTK6	KCTD8	0.029046	0.54993
PTK6	RP11-490B18.6	0.057495	0.23635
PTK6	CD52	0.068688	0.157
PTK6	RP11-395I14.2	0.09522	0.049529
PTK6	RP3-368A4.6	-0.040639	0.40279
PTK6	DACT2	-0.31457	3.0748e-11
PTK6	SLC39A4	0.29035	1.0136e-09
PTK6	SGK1	0.19058	7.5495e-05
PTK6	PKMP3	-0.13251	0.006163
PTK6	NDUFC2	0.017075	0.72528
PTK6	RP13-554M15.2	0.012828	0.79178
PTK6	GADD45G	0.024167	0.61891
PTK6	FUT3	0.39551	2.1068e-17
PTK6	NFE2	-0.17103	0.00039151
PTK6	PID1	0.10953	0.023765
PTK6	CTRL	-0.030776	0.52641
PTK6	RP11-311P8.2	0.096381	0.046804
PTK6	AGAP11	0.14635	0.002462
PTK6	RAB40A	-0.16914	0.00045484
PTK6	OXGR1	0.09666	0.046168
PTK6	DENND2A	-0.21316	9.0946e-06
PTK6	HIST1H2BK	0.086402	0.074845
PTK6	SCARNA7	0.13998	0.0037916
PTK6	RP1-223E5.4	-0.045558	0.34822
PTK6	NPFFR1	-0.067063	0.16708
PTK6	RP11-75L1.2	-0.11048	0.022573
PTK6	C1QL4	-0.26845	1.8229e-08
PTK6	RP3-402G11.25	0.12368	0.010616
PTK6	CASC15	-0.19099	7.2763e-05
PTK6	RP11-57A19.2	-0.32289	8.5803e-12
PTK6	STYK1	0.10883	0.024678
PTK6	RP11-617B3.2	-0.010912	0.82231
PTK6	RP11-171I2.1	-0.052	0.28424
PTK6	ALDH1L1-AS2	-0.27048	1.4081e-08
PTK6	RP11-679B19.1	0.00040376	0.99337
PTK6	RP11-126K1.6	-0.34831	1.3517e-13
PTK6	AARD	0.14413	0.0028666
PTK6	AC104667.3	0.23287	1.1786e-06
PTK6	RP11-5O17.1	0.098957	0.041205
PTK6	NANOS1	-0.21549	7.2064e-06
PTK6	CH507-513H4.5	0.014898	0.75914
PTK6	TIMP2	0.02269	0.6405
PTK6	PROX1	-0.019085	0.69448
PTK6	PITPNM3	0.2477	2.2386e-07
PTK6	CXorf57	-0.22273	3.4516e-06
PTK6	DMTN	0.045062	0.3535
PTK6	KIAA1755	-0.022382	0.64505
PTK6	TSPAN33	0.082177	0.090267
PTK6	RP11-203M5.7	-0.018179	0.7083
PTK6	MAL	0.25667	7.7692e-08
PTK6	PLA2G4B	0.04634	0.34
PTK6	IGKV1D-33	0.062808	0.19573
PTK6	TMEM200B	-0.008744	0.85719
PTK6	KLHL33	0.063161	0.19323
PTK6	ITGA8	0.04245	0.38213
PTK6	LL0XNC01-240C2.1	-0.33192	2.051e-12
PTK6	DAPP1	0.32233	9.3573e-12
PTK6	AC064875.2	0.0018482	0.96966
PTK6	TFCP2L1	0.15018	0.0018827
PTK6	RP11-632F7.3	0.079844	0.099817
PTK6	USP2-AS1	-0.071309	0.14174
PTK6	RP5-1024N4.4	0.00098525	0.98382
PTK6	SDR42E1	-0.038385	0.4294
PTK6	DLEU2L	0.065888	0.17465
PTK6	LY6G6C	0.26748	2.0598e-08
PTK6	RP11-30L15.4	0.017938	0.712
PTK6	SPATA17	-0.22302	3.3474e-06
PTK6	AP000473.5	-0.013468	0.78165
PTK6	ALOX12P2	0.13257	0.0061391
PTK6	RAB39B	-0.22301	3.3526e-06
PTK6	ELFN1-AS1	0.12171	0.011934
PTK6	GREB1	-0.10726	0.026849
PTK6	IGDCC4	0.0016234	0.97335
PTK6	RP11-661O13.1	0.026287	0.58847
PTK6	TMEM160	0.039399	0.41731
PTK6	CTC-366B18.4	0.121	0.012445
PTK6	LGALS9	0.26515	2.7545e-08
PTK6	ASPA	0.018528	0.70296
PTK6	LINC01503	0.26404	3.1632e-08
PTK6	VSTM4	0.023804	0.62419
PTK6	MYH11	0.078187	0.10708
PTK6	CTD-2012K14.5	0.017842	0.71347
PTK6	FAM106A	0.036157	0.45668
PTK6	C2	0.21664	6.4262e-06
PTK6	RP11-53M11.5	-0.16508	0.00062471
PTK6	LPAR5	0.14189	0.0033379
PTK6	CTC-529I10.2	0.015244	0.75373
PTK6	TREM2	0.17841	0.00021462
PTK6	YBX2	0.0055594	0.90891
PTK6	TPBGL	-0.043021	0.37575
PTK6	CMPK2	-0.018496	0.70345
PTK6	RP11-2K6.1	0.13009	0.007176
PTK6	LINC01296	-0.18301	0.00014572
PTK6	FAM65C	-0.07709	0.1121
PTK6	IRF5	0.26094	4.6327e-08
PTK6	TCEAL7	-0.10355	0.03262
PTK6	ST8SIA2	-0.28201	3.1406e-09
PTK6	LYPD2	0.3024	1.8537e-10
PTK6	APLP1	-0.13048	0.0070012
PTK6	LY6G5B	-0.022227	0.64734
PTK6	PLEKHS1	0.34283	3.4178e-13
PTK6	METRN	0.20547	1.9194e-05
PTK6	C9orf116	-0.085878	0.076634
PTK6	PRAME	-0.13678	0.0046815
PTK6	SLC43A1	-0.02996	0.53743
PTK6	CHST4	0.083563	0.084948
PTK6	NME1	-0.078101	0.10746
PTK6	DNAH5	0.13855	0.0041687
PTK6	LPO	-0.027758	0.56777
PTK6	IL18	0.35535	4.0021e-14
PTK6	SORT1	0.094889	0.050331
PTK6	FBP1	0.24716	2.382e-07
PTK6	PABPC1P7	-0.02243	0.64434
PTK6	MAGOH2P	-0.085657	0.077398
PTK6	TTYH2	-0.011764	0.8087
PTK6	SYNGR1	0.099485	0.040129
PTK6	PHLDA2	0.33053	2.5656e-12
PTK6	RP11-164J13.1	0.15759	0.0011003
PTK6	AC004870.4	0.17972	0.00019227
PTK6	GNB3	-0.20886	1.3856e-05
PTK6	KCNIP2	0.11432	0.018261
PTK6	ZNF385B	-0.099385	0.040331
PTK6	SLC27A2	-0.055003	0.25731
PTK6	TRPV4	0.087584	0.070937
PTK6	DLX4	-0.13535	0.0051366
PTK6	RP11-651L5.3	-0.080671	0.096341
PTK6	RP1-182D15.2	-0.12918	0.0075945
PTK6	RP11-283G6.3	0.083918	0.083627
PTK6	GS1-184P14.2	-0.031927	0.51106
PTK6	RP11-286N22.14	0.022119	0.64894
PTK6	HSF4	0.27407	8.8873e-09
PTK6	CTD-2536I1.3	-0.11498	0.017598
PTK6	PLAU	0.15933	0.00096672
PTK6	LTB	0.17542	0.00027449
PTK6	CTC-524C5.2	-0.034086	0.48289
PTK6	PLCL2	0.010735	0.82515
PTK6	PRDX3P1	0.1585	0.0010286
PTK6	KLF2	0.061713	0.20365
PTK6	CHAC2	-0.087936	0.069807
PTK6	PDZRN3	-0.035692	0.4625
PTK6	CTB-31O20.4	0.11315	0.019491
PTK6	RNF144B	0.081459	0.093122
PTK6	CA9	-0.016477	0.73453
PTK6	RP11-787I22.3	-0.069533	0.15196
PTK6	ZIM2	-0.17465	0.00029239
PTK6	LCN6	0.029797	0.53965
PTK6	NAALAD2	-0.13398	0.0056098
PTK6	CABLES1	-0.075022	0.12209
PTK6	RHOV	0.21267	9.5444e-06
PTK6	FABP5	-0.091291	0.059752
PTK6	OBP2A	-0.040015	0.41005
PTK6	RAB17	0.28349	2.5735e-09
PTK6	ADAP1	0.35475	4.4413e-14
PTK6	RN7SL417P	0.015486	0.74995
PTK6	OXCT2P1	0.0072575	0.88127
PTK6	INA	-0.20382	2.2452e-05
PTK6	RHBDL2	0.35069	8.9965e-14
PTK6	SOX11	-0.28187	3.1982e-09
PTK6	ADAMTSL4	0.096551	0.046415
PTK6	RP11-268J15.5	-0.0055602	0.9089
PTK6	IGFBP1	-0.032482	0.50373
PTK6	2025-03-02	0.0023027	0.9622
PTK6	RP11-348N5.7	-0.038402	0.42919
PTK6	TMEM108	-0.35142	7.9251e-14
PTK6	NCMAP	-0.018867	0.69779
PTK6	MMP9	0.13053	0.0069824
PTK6	RAB19	0.098667	0.041805
PTK6	IBSP	0.16038	0.00089375
PTK6	THSD4	0.18346	0.00014017
PTK6	AIF1L	-0.18087	0.00017461
PTK6	GLRA4	-0.086576	0.074258
PTK6	ACOT4	0.11727	0.015448
PTK6	MSLNL	0.15104	0.0017705
PTK6	RP11-437B10.1	0.057252	0.23833
PTK6	CCDC64	0.14363	0.0029655
PTK6	IGF2BP3	-0.19566	4.7852e-05
PTK6	RP11-89K21.1	-0.20579	1.8622e-05
PTK6	CTB-31O20.6	0.0042762	0.92988
PTK6	CA8	-0.14495	0.0027104
PTK6	TUB	-0.26208	4.03e-08
PTK6	S100A5	0.23247	1.2311e-06
PTK6	RP11-677I18.3	0.048718	0.31578
PTK6	RNF208	0.18761	9.7967e-05
PTK6	C7	0.0044652	0.92679
PTK6	CENPW	-0.1027	0.034081
PTK6	SYNPO2	0.046802	0.33521
PTK6	AC114271.2	-0.12217	0.011614
PTK6	RP11-203J24.9	0.055516	0.25289
PTK6	ALPPL2	0.13453	0.0054157
PTK6	ACY3	0.12682	0.0087829
PTK6	NINJ2	0.20933	1.3235e-05
PTK6	NUS1P2	0.079349	0.10194
PTK6	LDLRAD1	0.053822	0.26769
PTK6	RP11-54H7.4	0.31944	1.4633e-11
PTK6	MUC15	0.058562	0.22775
PTK6	SHE	-0.00029192	0.99521
PTK6	SLC16A13	0.0017082	0.97196
PTK6	UBASH3B	0.11202	0.020746
PTK6	TYRO3	-0.2217	3.8367e-06
PTK6	DNM3OS	0.027068	0.57744
PTK6	LINC00475	0.064504	0.1839
PTK6	SST	-0.16339	0.00071134
PTK6	ERICH6B	0.10957	0.023719
PTK6	FOXP3	0.12511	0.0097423
PTK6	LINC01101	-0.26765	2.0155e-08
PTK6	ARHGAP11B	0.054735	0.25964
PTK6	ITGB8	0.38032	4.1425e-16
PTK6	RP11-234B24.6	-0.14914	0.0020251
PTK6	USP6	-0.21185	1.0349e-05
PTK6	PCSK1N	-0.22165	3.8553e-06
PTK6	PRR5-ARHGAP8	0.17864	0.0002105
PTK6	BBOX1-AS1	-0.27893	4.7216e-09
PTK6	DDIT4	0.24103	4.786e-07
PTK6	CCDC69	0.057228	0.23853
PTK6	TMEM63C	0.1975	4.0453e-05
PTK6	SNCAIP	-0.21076	1.1508e-05
PTK6	GMNC	-0.029394	0.54515
PTK6	MMP1	-0.032401	0.5048
PTK6	LINC00313	0.23574	8.6211e-07
PTK6	RP11-93K22.13	0.28507	2.082e-09
PTK6	CTD-2231H16.1	-0.14822	0.0021609
PTK6	ADGRG4	0.012939	0.79001
PTK6	DIRAS3	-0.14794	0.0022029
PTK6	LINC-PINT	0.21496	7.598e-06
PTK6	SCEL	0.19255	6.3317e-05
PTK6	ZNF724P	-0.2443	3.3088e-07
PTK6	OAS1	0.043713	0.36812
PTK6	AC004623.3	0.053409	0.27138
PTK6	PDCL3P4	-0.0026703	0.95618
PTK6	RP11-585P4.6	-0.11404	0.018551
PTK6	ANGPT4	-0.033949	0.48466
PTK6	HRK	-0.18801	9.465e-05
PTK6	OAS3	0.034251	0.48077
PTK6	DHFRP1	-0.05871	0.22657
PTK6	PDE2A	0.11463	0.017943
PTK6	PDE6G	0.11235	0.020371
PTK6	AC000078.5	0.070383	0.147
PTK6	KCNJ11	-0.15494	0.0013369
PTK6	KRT81	0.024937	0.60777
PTK6	MCCC1-AS1	0.049155	0.31145
PTK6	TRPV6	-0.079591	0.1009
PTK6	GABRP	0.25041	1.634e-07
PTK6	RP3-439F8.1	0.16766	0.00051088
PTK6	RP11-349F21.5	-0.038652	0.42619
PTK6	AF131216.6	-0.081584	0.092621
PTK6	RP11-429J17.7	0.21065	1.1641e-05
PTK6	TXLNB	-0.12187	0.011821
PTK6	RN7SK	-0.04145	0.39346
PTK6	ENTPD2	0.10366	0.03244
PTK6	AADAC	0.0031445	0.9484
PTK6	RP11-489G11.3	-0.008191	0.86614
PTK6	PRKCQ	0.029797	0.53966
PTK6	RP1-80N2.3	-0.093947	0.052668
PTK6	C6orf3	-0.27563	7.2691e-09
PTK6	RP1-292L20.3	0.022224	0.64737
PTK6	CLDN11	-0.075572	0.11937
PTK6	AC007389.3	-0.10535	0.029702
PTK6	RP11-872J21.3	-0.10786	0.026
PTK6	RP4-530I15.9	0.11522	0.017354
PTK6	NEURL3	-0.08712	0.072452
PTK6	CEP126	-0.15042	0.001851
PTK6	CTD-3010D24.3	0.11462	0.017958
PTK6	RP4-758J24.6	0.10911	0.024311
PTK6	PDE1C	0.0032403	0.94683
PTK6	KIF26B	0.064205	0.18595
PTK6	RP11-373E16.3	0.012857	0.79131
PTK6	ITGA10	0.044582	0.35866
PTK6	LINC01508	0.049748	0.30565
PTK6	GABBR1	-0.10825	0.025468
PTK6	OR52N4	0.0051624	0.91539
PTK6	CTD-2267D19.1	0.05379	0.26797
PTK6	RP11-1038A11.3	-0.35155	7.7525e-14
PTK6	FOXL2NB	-0.030149	0.53487
PTK6	PARM1	0.090504	0.061996
PTK6	RP11-49C9.2	0.077719	0.1092
PTK6	SMC1B	-0.063891	0.18812
PTK6	ADRB3	0.031349	0.51873
PTK6	PLD1	-0.05687	0.24149
PTK6	RP11-32B5.1	0.036638	0.45072
PTK6	PPAP2C	0.24769	2.2403e-07
PTK6	RP13-516M14.1	0.13783	0.0043718
PTK6	REC8	-0.083827	0.083964
PTK6	RP11-170N16.3	-0.013813	0.77619
PTK6	LVRN	-0.064424	0.18445
PTK6	CTD-2114J12.1	0.1217	0.011942
PTK6	THEMIS2	0.090377	0.062364
PTK6	BOLA2	-0.038702	0.4256
PTK6	TTN	-0.023715	0.62548
PTK6	CTNNA2	-0.1617	0.00080891
PTK6	CT45A3	-0.14883	0.0020709
PTK6	PDE1B	0.038174	0.43194
PTK6	FTOP1	-0.16609	0.00057761
PTK6	CACTIN-AS1	0.25211	1.3375e-07
PTK6	C8orf46	0.078913	0.10384
PTK6	RNF183	0.17074	0.00040062
PTK6	LINC00598	0.1327	0.0060886
PTK6	RP11-657O9.1	-0.23305	1.1557e-06
PTK6	LINC01215	0.090856	0.060983
PTK6	TMEM240	-0.18637	0.00010913
PTK6	SIAH3	-0.049356	0.30948
PTK6	PI4KAP1	0.095204	0.049568
PTK6	CDH23	-0.0043839	0.92811
PTK6	AGR2	-0.038613	0.42666
PTK6	AC005519.4	-0.052457	0.28002
PTK6	AC026150.8	0.13189	0.0064104
PTK6	RNVU1-7	-0.076733	0.11378
PTK6	CKS1BP3	-0.080622	0.096544
PTK6	CCL20	0.16459	0.0006485
PTK6	THRSP	0.061236	0.20717
PTK6	PLXDC1	0.065047	0.18024
PTK6	ADCY10P1	-0.05608	0.2481
PTK6	FAM167A	-0.030444	0.53089
PTK6	RP11-326C3.2	0.15108	0.001765
PTK6	F12	0.16027	0.00090099
PTK6	ZNF296	0.27817	5.217e-09
PTK6	MAF	0.059049	0.22389
PTK6	RP11-359K18.4	0.16321	0.00072135
PTK6	RHOB	-0.042711	0.37921
PTK6	HLA-DPA1	0.23455	9.8147e-07
PTK6	MMP12	0.066556	0.17032
PTK6	SHISA9	-0.038631	0.42644
PTK6	CTD-2325P2.4	0.070523	0.14619
PTK6	VIP	0.097458	0.04439
PTK6	RAC3	-0.11349	0.019129
PTK6	SKINTL	-0.10575	0.029083
PTK6	RP11-293M10.6	0.1261	0.0091775
PTK6	PTGER1	0.033655	0.48845
PTK6	RP11-783K16.5	0.25809	6.5529e-08
PTK6	C10orf10	0.34044	5.0952e-13
PTK6	TMEM61	0.14111	0.0035166
PTK6	AC003104.1	-0.0088173	0.85601
PTK6	GATM	-0.15437	0.0013936
PTK6	RP11-70D24.3	-0.015186	0.75464
PTK6	C19orf73	0.18047	0.00018068
PTK6	SNORA73B	-0.022425	0.64441
PTK6	SALL4	-0.093865	0.052875
PTK6	HMGN1P18	-0.0010983	0.98197
PTK6	CCL8	0.018475	0.70377
PTK6	ZEB2-AS1	0.15238	0.0016093
PTK6	RP4-545K15.5	0.076152	0.11655
PTK6	C2orf88	0.07446	0.12492
PTK6	NPM1P26	0.068105	0.16057
PTK6	HAGLR	-0.038791	0.42453
PTK6	CEBPA	-0.049477	0.30829
PTK6	HAAO	-0.10771	0.026219
PTK6	RP11-972P1.7	0.0048854	0.91992
PTK6	CD48	0.15116	0.0017556
PTK6	ATP1B3-AS1	0.14294	0.0031088
PTK6	AMY1C	0.034555	0.47688
PTK6	RP11-97O12.5	-0.045145	0.35262
PTK6	LEF1	-0.2544	1.0202e-07
PTK6	TCF7	-0.050703	0.29644
PTK6	ATP10B	0.24586	2.7677e-07
PTK6	SLC25A3P1	0.19608	4.6044e-05
PTK6	MAGIX	0.091074	0.060363
PTK6	EFNA3	-0.14372	0.0029482
PTK6	INMT	0.048125	0.32171
PTK6	RASGRP1	0.13523	0.0051778
PTK6	LL22NC03-N95F10.1	-0.010469	0.82942
PTK6	ERRFI1	0.12246	0.011418
PTK6	SLC6A11	0.054894	0.25826
PTK6	XXbac-B444P24.13	-0.044874	0.35552
PTK6	BNC2	-0.10112	0.036955
PTK6	AMY1B	0.10497	0.030303
PTK6	TLR7	0.21157	1.0629e-05
PTK6	RP11-68L18.1	-0.073487	0.12994
PTK6	TMSB4XP4	0.065418	0.17776
PTK6	CDK15	-0.061168	0.20768
PTK6	PPP4R4	-0.20279	2.474e-05
PTK6	RP11-713M15.2	0.06983	0.15021
PTK6	SLC26A9	0.24439	3.2724e-07
PTK6	RP11-95H3.1	-0.069142	0.15428
PTK6	RP11-426C22.8	0.025852	0.59465
PTK6	CCDC144B	0.07705	0.11229
PTK6	CXCL9	0.093307	0.054307
PTK6	ZNF781	-0.32255	9.0491e-12
PTK6	KCNMB2-AS1	-0.28493	2.1228e-09
PTK6	NDNF	-0.045644	0.34732
PTK6	AC012531.25	0.030565	0.52925
PTK6	SNHG24	-0.10528	0.02981
PTK6	RP11-3J1.1	-0.1724	0.00035069
PTK6	MIR497HG	0.19239	6.4231e-05
PTK6	DUXAP8	-0.20951	1.3004e-05
PTK6	ALDH1A1	-0.067072	0.16702
PTK6	CTC-548K16.1	-0.12973	0.0073384
PTK6	RPS2P32	-0.13145	0.0065902
PTK6	TAL1	-0.019058	0.69488
PTK6	HIGD1AP11	-0.12055	0.01278
PTK6	CCND1	0.22789	2.0101e-06
PTK6	AC015971.2	0.074027	0.12713
PTK6	MESP2	0.18354	0.00013927
PTK6	SYPL2	0.040885	0.39994
PTK6	RP11-13K12.2	-0.044161	0.36322
PTK6	CAMK2N2	-0.031554	0.516
PTK6	LINC00926	0.11168	0.021142
PTK6	LINC00506	-0.006589	0.89214
PTK6	RP11-361L15.5	0.011552	0.81208
PTK6	TMEM51-AS1	0.21466	7.8355e-06
PTK6	FCER1G	0.18105	0.00017204
PTK6	MIR205HG	0.17663	0.00024851
PTK6	TBX3	-0.04614	0.34209
PTK6	IL32	0.28666	1.6801e-09
PTK6	RP11-244M2.1	-0.26871	1.7624e-08
PTK6	PABPC5	-0.12251	0.011386
PTK6	RP11-243M5.5	0.039745	0.41322
PTK6	CTD-2224J9.8	0.045545	0.34836
PTK6	GOLGA6L3	0.098264	0.042654
PTK6	ADGRD1	-0.22757	2.0782e-06
PTK6	VIPR2	0.12212	0.011648
PTK6	PPP1R14BP3	0.13281	0.0060463
PTK6	RBPMS	0.057433	0.23685
PTK6	RP11-395N3.2	-0.15999	0.00092061
PTK6	ANO4	-0.03752	0.43987
PTK6	KB-1572G7.3	0.03512	0.4697
PTK6	FBN3	-0.32118	1.1182e-11
PTK6	SMAD9	-0.32528	5.897e-12
PTK6	OSBP2	-0.13831	0.0042367
PTK6	RP11-357H14.16	0.14782	0.0022227
PTK6	KIF1A	-0.25631	8.1201e-08
PTK6	RP11-333E1.2	0.03424	0.48092
PTK6	HLA-DRB1	0.26635	2.3723e-08
PTK6	RP11-69E11.4	0.062471	0.19815
PTK6	RP11-360L9.7	-0.14323	0.0030486
PTK6	ARHGAP40	0.22975	1.6495e-06
PTK6	ADAMTS14	0.26774	1.9915e-08
PTK6	CYP4F11	0.30829	7.8533e-11
PTK6	KAAG1	-0.18385	0.00013557
PTK6	TSACC	-0.077192	0.11163
PTK6	KIAA1161	0.0079754	0.86963
PTK6	TM4SF1	0.1813	0.00016841
PTK6	RP11-60L3.1	-0.12461	0.010039
PTK6	RANP4	-0.070929	0.14388
PTK6	CFH	0.11438	0.018196
PTK6	GDPD2	-0.25196	1.3617e-07
PTK6	CELF6	0.073268	0.13109
PTK6	GOLGA8Q	-0.037853	0.43583
PTK6	SYNM	0.080483	0.097122
PTK6	GS1-114I9.1	0.20356	2.2999e-05
PTK6	RPLP0P2	0.18976	8.1156e-05
PTK6	ALDH3B1	0.36817	4.0223e-15
PTK6	MRGPRF	0.097166	0.045034
PTK6	THPO	-0.037699	0.4377
PTK6	PROK1	0.019161	0.69332
PTK6	MICU3	-0.15892	0.0009971
PTK6	CHRM3-AS2	0.11502	0.017553
PTK6	ANKRD10-IT1	0.083826	0.083969
PTK6	RP11-762L8.6	0.17618	0.00025786
PTK6	MTRNR2L4	-0.05269	0.27789
PTK6	SLC12A5	-0.035021	0.47096
PTK6	RP11-106M3.2	0.099158	0.040792
PTK6	MXRA5	0.036142	0.45686
PTK6	MYH1	-0.026674	0.58299
PTK6	AC093642.3	0.012045	0.80422
PTK6	CHAC1	-0.053907	0.26693
PTK6	TYMSOS	-0.096243	0.047122
PTK6	FOXN1	0.047579	0.32724
PTK6	CEBPB-AS1	-0.13093	0.0068066
PTK6	ENHO	-0.27364	9.3989e-09
PTK6	FAM124A	-0.11318	0.019454
PTK6	HMGA2	-0.28954	1.1335e-09
PTK6	LRP8	0.2208	4.2101e-06
PTK6	RP1-78O14.1	0.043968	0.36533
PTK6	MAOB	-0.13809	0.0042973
PTK6	CXCR3	0.17739	0.00023349
PTK6	NBEA	-0.15962	0.00094635
PTK6	RP1-172N19.5	-0.089866	0.063865
PTK6	LINC01094	0.23789	6.7964e-07
PTK6	FRAS1	-0.25504	9.4477e-08
PTK6	HIST2H3A	-0.052119	0.28314
PTK6	HIST2H3C	-0.052119	0.28314
PTK6	COL9A1	-0.16412	0.00067258
PTK6	LHX1	-0.14429	0.0028363
PTK6	DIO3	0.068529	0.15797
PTK6	CELF2	0.10121	0.036783
PTK6	RP11-446H18.6	-0.10336	0.032936
PTK6	CRTAC1	-0.19796	3.8771e-05
PTK6	NRN1L	0.041122	0.39721
PTK6	PDGFRB	0.034865	0.47293
PTK6	RP11-465B22.3	0.1466	0.0024189
PTK6	SORD2P	0.051696	0.28707
PTK6	PLD4	0.20462	2.0816e-05
PTK6	SPON1	0.13342	0.0058156
PTK6	MCOLN2	-0.065195	0.17925
PTK6	LINC00844	-0.041521	0.39264
PTK6	ADAM33	-0.15063	0.0018232
PTK6	PRSS33	-0.14215	0.0032783
PTK6	RP11-384L8.1	0.10533	0.029738
PTK6	CTSS	0.25835	6.347e-08
PTK6	ADAMDEC1	0.12031	0.01296
PTK6	SMOC2	0.11223	0.020504
PTK6	C17orf96	-0.14835	0.0021412
PTK6	GREB1L	0.0073731	0.8794
PTK6	IGFBP6	-0.0070596	0.88449
PTK6	HLA-DPB1	0.23726	7.2902e-07
PTK6	FUT8-AS1	-0.083796	0.08408
PTK6	LY86	0.16941	0.00044509
PTK6	RP11-523O18.5	0.10232	0.034758
PTK6	PROX2	0.029537	0.5432
PTK6	RP11-562A8.4	0.10092	0.037324
PTK6	SUCNR1	0.11222	0.02052
PTK6	PDZRN3-AS1	-0.0089076	0.85455
PTK6	MEG8	-0.087955	0.069746
PTK6	SEZ6L2	0.15594	0.0012429
PTK6	HLA-DMB	0.1627	0.00074986
PTK6	SLC6A1	-0.012901	0.79062
PTK6	RP11-844P9.2	-0.014786	0.76091
PTK6	FLRT2	-0.072352	0.13599
PTK6	ENOX1	0.032621	0.5019
PTK6	MANEAL	0.13057	0.006965
PTK6	EDA2R	0.020344	0.67543
PTK6	KCP	-0.013303	0.78426
PTK6	RP11-627K11.6	-0.069721	0.15085
PTK6	MRO	0.082654	0.088407
PTK6	IL2RB	0.24133	4.6271e-07
PTK6	AC005537.2	-0.31907	1.5483e-11
PTK6	WFDC21P	-0.024257	0.6176
PTK6	KRT1	-0.0012214	0.97995
PTK6	MAGEA4	-0.17441	0.00029802
PTK6	FSTL4	-0.29717	3.9152e-10
PTK6	KLF4	0.084676	0.080863
PTK6	HRC	-0.088645	0.067575
PTK6	AC007405.6	-0.21531	7.3405e-06
PTK6	CTC-490E21.11	0.053504	0.27053
PTK6	AMT	0.079058	0.10321
PTK6	AC124789.1	0.26439	3.0286e-08
PTK6	RP11-325K4.3	0.11738	0.015349
PTK6	ALMS1P	-0.10657	0.027848
PTK6	TNFRSF11B	0.27694	6.1233e-09
PTK6	OR2A1	0.1006	0.037931
PTK6	AC093110.3	0.036734	0.44952
PTK6	KDM5D	0.095745	0.04828
PTK6	AKAP12	-0.049597	0.30712
PTK6	CTD-2651B20.4	-0.039593	0.41501
PTK6	ATP2A1-AS1	-0.1415	0.0034267
PTK6	RP11-89K11.1	-0.11192	0.020866
PTK6	RP11-346E8.1	0.02224	0.64714
PTK6	RBM20	-0.08498	0.079778
PTK6	CSPG4P11	-0.094694	0.050807
PTK6	RASGRF2-AS1	0.17435	0.00029955
PTK6	AP000280.66	0.027018	0.57813
PTK6	PTPRD-AS1	-0.083987	0.083375
PTK6	LEPR	-0.0056978	0.90666
PTK6	MAP4K1	-0.08027	0.098013
PTK6	HAPLN1	0.082118	0.090498
PTK6	ELL2	0.18067	0.00017757
PTK6	SMIM24	-0.11087	0.022105
PTK6	RTN2	0.25319	1.1772e-07
PTK6	C10orf91	0.21338	8.8949e-06
PTK6	MESTP1	-0.15615	0.0012234
PTK6	EMBP1	-0.33134	2.2525e-12
PTK6	CH507-42P11.8	0.13997	0.0037937
PTK6	HIST1H2BJ	0.032886	0.49844
PTK6	CD164L2	0.20261	2.5174e-05
PTK6	GUCA1B	0.015076	0.75635
PTK6	RIMKLA	-0.037611	0.43877
PTK6	CA12	0.14735	0.0022967
PTK6	MEST	-0.37662	8.3606e-16
PTK6	RP11-70L8.4	0.032223	0.50714
PTK6	RP6-24A23.8	-0.077414	0.1106
PTK6	VSTM2L	0.13127	0.0066622
PTK6	SYT8	0.24709	2.4025e-07
PTK6	KRT8P45	0.040253	0.40727
PTK6	CTD-3214H19.6	0.034109	0.4826
PTK6	IL2RG	0.26449	2.9918e-08
PTK6	RP11-230C9.2	-0.20748	1.5827e-05
PTK6	ZDBF2	0.035875	0.46021
PTK6	RP11-1391J7.1	0.061394	0.20601
PTK6	CDKN1A	0.056533	0.24429
PTK6	PLA2G1B	-0.1514	0.001726
PTK6	RP11-45M22.2	0.15923	0.00097424
PTK6	MMP24	-0.095078	0.049871
PTK6	BLNK	0.24315	3.7695e-07
PTK6	OTX1	0.008942	0.854
PTK6	HOXB3	0.12961	0.0073945
PTK6	CHRNA1	-0.041488	0.39301
PTK6	KIF12	0.11405	0.018538
PTK6	KIAA1324	-0.15465	0.0013651
PTK6	RP11-73M18.2	-0.11146	0.021392
PTK6	HIST1H2AM	-0.08038	0.097554
PTK6	CH507-513H4.3	-0.0048706	0.92016
PTK6	CH507-513H4.4	-0.0048706	0.92016
PTK6	CH507-513H4.6	-0.0048706	0.92016
PTK6	TDRD5	-0.13691	0.0046429
PTK6	RP11-173A16.1	0.049837	0.30478
PTK6	RP11-295K3.1	0.0086279	0.85907
PTK6	CTD-2325P2.2	0.04884	0.31457
PTK6	RGS10	0.059534	0.2201
PTK6	MCIDAS	-0.10134	0.036532
PTK6	RP11-573M3.3	-0.17296	0.00033516
PTK6	PPAPDC3	-0.0014869	0.97559
PTK6	DHCR24	0.29034	1.0158e-09
PTK6	DNM1P51	0.018263	0.70702
PTK6	UPK2	0.02575	0.59612
PTK6	PKHD1	-0.21919	4.9617e-06
PTK6	CTD-2020K17.3	-0.018113	0.70932
PTK6	RP11-258F1.1	0.0018923	0.96894
PTK6	SDPR	-0.033946	0.4847
PTK6	RP11-806H10.4	0.061666	0.204
PTK6	TMEM169	-0.096556	0.046404
PTK6	RP11-468N14.13	0.007659	0.87476
PTK6	RASGEF1A	0.36548	6.5734e-15
PTK6	C19orf84	0.043437	0.37115
PTK6	TUBB3	-0.06903	0.15495
PTK6	TMEFF1	-0.47261	4.3318e-25
PTK6	RP11-426C22.5	0.048221	0.32075
PTK6	AQP6	-0.14858	0.0021076
PTK6	OSR2	-0.0058449	0.90426
PTK6	MYH7B	-0.057599	0.23549
PTK6	AP002954.3	0.031526	0.51638
PTK6	CTD-3193O13.12	-0.084141	0.082807
PTK6	AP000692.9	0.10714	0.027023
PTK6	DMBX1	-0.049292	0.3101
PTK6	MX2	-0.003557	0.94165
PTK6	LL0XNC01-36H8.1	0.027741	0.56801
PTK6	FAT4	-0.064741	0.1823
PTK6	SPATA12	-0.14376	0.0029408
PTK6	THY1	0.013469	0.78163
PTK6	COL27A1	0.091842	0.058222
PTK6	CHI3L1	0.18153	0.0001652
PTK6	AC114730.11	0.013297	0.78434
PTK6	KRT8P10	0.041972	0.38751
PTK6	CYP11B1	0.10095	0.037262
PTK6	ALPP	0.1646	0.00064802
[truncated: 4,561 more rows]
