# Supplementary material for: Inhibition of PTK6 Hinders the Growth and Migration of Ovarian Cancer and Its Potential Clinical Significance
Source: Research Square preprint supplement (doi:10.21203/rs.3.rs-8166231/v1), 2025-12-12
Supplement: Supplementary file 2 [file b696bffcd9956ac28aea45d3.xlsx]

## Sheet: Sheet1
Gene	baseMean	log2FoldChange	lfcSE	stat	pvalue	padj	reg
AASS	1206.6	-5.61733	0.134041	-41.9075	0	0	DOWN
ABCA10	892.184	-7.40464	0.159779	-46.3431	0	0	DOWN
ABCA6	884.494	-6.09573	0.159471	-38.2248	0	0	DOWN
ABCA9	1037.98	-6.25672	0.164475	-38.0407	0	0	DOWN
ABHD11	4159.59	4.00015	0.0918991	43.5276	0	0	UP
AC008992.1	9.2111	-7.75786	0.200286	-38.7338	0	0	DOWN
AC234582.1	929.281	6.87661	0.177676	38.703	0	0	UP
ACAD11	1377.83	-2.95763	0.0692799	-42.691	0	0	DOWN
AGRN	29274.1	4.26151	0.0928184	45.9124	0	0	UP
AL162151.3	77.8346	-10.8379	0.211275	-51.2979	0	0	DOWN
ALG3	5345.28	2.68431	0.0683194	39.2906	0	0	UP
ANLN	1369.78	3.79261	0.0988771	38.3568	0	0	UP
AP1M2	4728.12	6.6196	0.16634	39.7957	0	0	UP
AQP5	2750.43	8.49066	0.201074	42.2265	0	0	UP
ARHGAP11A	935.662	3.90198	0.0931168	41.9042	0	0	UP
ARHGAP8	1010.37	5.04212	0.103553	48.6914	0	0	UP
ARMCX4	1050.34	-4.06815	0.0886106	-45.9104	0	0	DOWN
ASF1B	2239.32	5.84593	0.11364	51.4424	0	0	UP
ASIP	105.548	-6.43347	0.144284	-44.5891	0	0	DOWN
ASPM	912.679	4.64243	0.110782	41.9061	0	0	UP
ATP6V1B1	9143.97	6.98648	0.16079	43.451	0	0	UP
AUNIP	255.614	4.26004	0.110153	38.6737	0	0	UP
AURKB	937.165	5.84636	0.13227	44.2003	0	0	UP
BAIAP2L1	2714.31	3.98823	0.0794083	50.2244	0	0	UP
BCAM	96525.4	4.57048	0.120883	37.8092	0	0	UP
BIRC5	2196.77	6.39987	0.127685	50.1223	0	0	UP
BLM	344.091	4.12562	0.104633	39.4294	0	0	UP
BRI3BP	1575.54	3.24636	0.0817505	39.7107	0	0	UP
BSPRY	701.369	5.86127	0.136454	42.9542	0	0	UP
BUB1	1466.34	5.05127	0.109037	46.3261	0	0	UP
BUB1B	915.723	5.01891	0.105178	47.7182	0	0	UP
C19orf33	4972.99	6.18565	0.16472	37.5525	0	0	UP
C1orf106	3526.57	6.26137	0.142827	43.8387	0	0	UP
C1orf186	4195.22	8.15604	0.183575	44.429	0	0	UP
C1orf210	972.999	6.37958	0.146349	43.5916	0	0	UP
C2orf15	341.597	3.18116	0.0796123	39.9581	0	0	UP
C6orf132	3294.95	5.90678	0.127607	46.2887	0	0	UP
CACNB2	297.073	-5.01875	0.107073	-46.8722	0	0	DOWN
CACNG4	1879.87	7.71285	0.196618	39.2276	0	0	UP
CAMSAP3	2386.65	4.67174	0.113698	41.0891	0	0	UP
CBLC	1211.41	6.48577	0.170692	37.9969	0	0	UP
CCDC64B	640.126	5.37179	0.134525	39.9314	0	0	UP
CCNB1	2649.42	3.94173	0.0901127	43.7423	0	0	UP
CCNB2	1699.56	5.21791	0.102293	51.0097	0	0	UP
CCNE1	1737.51	5.5226	0.144422	38.2394	0	0	UP
CD24	56313.2	6.94081	0.18261	38.009	0	0	UP
CDC20	3517	6.94212	0.119983	57.8594	0	0	UP
CDC25C	355.69	6.54642	0.145908	44.8669	0	0	UP
CDC45	445.201	5.31344	0.126589	41.9739	0	0	UP
CDCA2	310.156	4.91269	0.128098	38.3511	0	0	UP
CDCA5	1364.08	4.83023	0.0934477	51.6891	0	0	UP
CDCA8	1366.04	5.1227	0.109574	46.7511	0	0	UP
CDCP1	2365.74	5.14769	0.12988	39.6341	0	0	UP
CDH1	8655.32	4.77786	0.110005	43.4329	0	0	UP
CDK1	2113.13	4.49815	0.0927574	48.4936	0	0	UP
CDKN2A	7969.09	8.94672	0.183737	48.6932	0	0	UP
CDKN3	672.783	4.65178	0.114534	40.6147	0	0	UP
CDT1	1272.67	4.99848	0.104375	47.8896	0	0	UP
CELSR1	5393.22	5.11268	0.11588	44.1204	0	0	UP
CELSR2	8820.52	4.50979	0.103914	43.399	0	0	UP
CENPA	587.918	6.58751	0.141434	46.5765	0	0	UP
CENPF	2747.2	4.48904	0.102171	43.9365	0	0	UP
CENPM	421.011	4.71936	0.120363	39.2092	0	0	UP
CEP55	1255.84	6.21819	0.131382	47.329	0	0	UP
CHMP4C	859.185	4.6186	0.116695	39.5784	0	0	UP
CHST7	563.075	-4.45786	0.109601	-40.6735	0	0	DOWN
CIRBP	9856.84	-3.09081	0.0691511	-44.6964	0	0	DOWN
CKAP2	1715.47	3.08434	0.0794467	38.8228	0	0	UP
CKAP2L	513.849	6.05887	0.131872	45.9452	0	0	UP
CKS2	2850.6	4.80053	0.115213	41.6665	0	0	UP
CLDN16	5317.91	9.8423	0.245989	40.0112	0	0	UP
CLDN3	25493.6	10.6428	0.142698	74.5825	0	0	UP
CLDN4	19165.9	6.42491	0.14788	43.4468	0	0	UP
CLDN6	5024.32	12.9052	0.337344	38.2555	0	0	UP
CLDN7	7236.37	6.10364	0.133623	45.6782	0	0	UP
CLIC5	3890.98	5.95417	0.151842	39.2128	0	0	UP
CLK1	4485.43	-2.77461	0.0722234	-38.417	0	0	DOWN
CMTM7	4437.31	4.39611	0.109964	39.9777	0	0	UP
CMTM8	756.242	4.25403	0.0983239	43.2655	0	0	UP
CMYA5	1989.26	-5.49	0.144138	-38.0886	0	0	DOWN
CORO2A	1342.9	4.63486	0.112337	41.2585	0	0	UP
CP	18297.1	7.84034	0.17349	45.1919	0	0	UP
CRABP2	22952.9	6.34326	0.161796	39.2052	0	0	UP
CRB3	801.511	5.69414	0.129548	43.954	0	0	UP
CTXN1	6283.15	5.11062	0.129503	39.4633	0	0	UP
CXADR	2735.07	4.97128	0.112392	44.2316	0	0	UP
CXXC5	7385.18	4.56165	0.0956462	47.693	0	0	UP
CYP2S1	1459.71	5.90696	0.143024	41.3006	0	0	UP
DCDC2	1279.76	5.63558	0.147496	38.2084	0	0	UP
DDIAS	469.604	4.56729	0.106479	42.8938	0	0	UP
DEPDC1	817.631	6.5484	0.134928	48.5327	0	0	UP
DEPDC1B	422.752	5.03599	0.129018	39.0334	0	0	UP
DIAPH3	419.163	5.04583	0.133889	37.6866	0	0	UP
DIO3OS	2325.82	-7.47806	0.194179	-38.5111	0	0	DOWN
DLGAP5	833.613	5.67977	0.134905	42.1019	0	0	UP
DOK7	1606.15	5.90226	0.152793	38.6291	0	0	UP
DPP3	3025.32	2.57015	0.0632744	40.6192	0	0	UP
DSP	15727.5	4.62953	0.113464	40.8018	0	0	UP
DTL	653.079	5.08176	0.103453	49.1213	0	0	UP
E2F2	514.075	5.16525	0.135549	38.1063	0	0	UP
E2F8	506.228	6.52509	0.139575	46.7496	0	0	UP
ECE2	1217.87	4.24382	0.109522	38.7487	0	0	UP
ECHDC2	5343.82	-3.39487	0.0848437	-40.0133	0	0	DOWN
ECT2	2964.92	4.76357	0.0894372	53.2616	0	0	UP
EGFL6	1034.19	7.28842	0.167741	43.4505	0	0	UP
ELF3	14560.9	6.19127	0.148141	41.7932	0	0	UP
EML5	940.878	-2.9486	0.0783329	-37.6419	0	0	DOWN
EPCAM	14128.4	8.17654	0.108366	75.4533	0	0	UP
EPHA1	1627.08	4.72191	0.122145	38.6584	0	0	UP
EPPK1	5591.07	7.04183	0.15549	45.2881	0	0	UP
EPS8L1	3673.44	4.94043	0.123346	40.0535	0	0	UP
ERBB3	5591.81	4.93008	0.127162	38.7702	0	0	UP
ESPL1	1399.97	4.74724	0.112498	42.1986	0	0	UP
ESPN	3265.2	6.48763	0.172877	37.5274	0	0	UP
ESRP1	6205.49	6.28538	0.151411	41.5121	0	0	UP
ESRP2	1415.3	4.66211	0.0989546	47.1136	0	0	UP
ETV4	3060.86	7.26933	0.163391	44.4903	0	0	UP
EVA1A	595.47	5.01826	0.129767	38.6713	0	0	UP
EVPL	2315.5	5.17539	0.121153	42.7177	0	0	UP
EXO1	415.485	4.99008	0.1096	45.5301	0	0	UP
EZH1	2298.15	-2.85845	0.0633568	-45.1168	0	0	DOWN
FAM13A-AS1	143.591	-3.886	0.103498	-37.5466	0	0	DOWN
FAM83D	1287.98	4.92339	0.116432	42.2857	0	0	UP
FAM83H	8913.79	6.12781	0.137565	44.5449	0	0	UP
FAM83H-AS1	1117.64	5.92482	0.154921	38.2442	0	0	UP
FGF18	1531.79	6.39059	0.16917	37.7761	0	0	UP
FOLR1	17499.3	10.5714	0.193752	54.5617	0	0	UP
FOXM1	3975.64	5.5337	0.103702	53.3616	0	0	UP
FRAT2	1274.59	2.84186	0.0730959	38.8786	0	0	UP
GALNT12	748.923	4.56217	0.116294	39.2298	0	0	UP
GCKR	121.566	-6.185	0.143767	-43.021	0	0	DOWN
GINS1	807.939	3.83394	0.0882165	43.4606	0	0	UP
GJB1	1239.03	7.75249	0.1964	39.4729	0	0	UP
GOLGA8N	811.49	-4.36883	0.107883	-40.496	0	0	DOWN
GPRASP1	1997.26	-6.1707	0.112332	-54.9327	0	0	DOWN
GPRASP2	725.813	-3.53841	0.0915146	-38.665	0	0	DOWN
GRB7	4561.1	5.5536	0.126423	43.9286	0	0	UP
GRHL2	1487.26	6.06554	0.13797	43.9626	0	0	UP
GRIP2	329.129	-4.99887	0.128653	-38.8556	0	0	DOWN
GRK5	743.393	-4.0499	0.100925	-40.1277	0	0	DOWN
GTSE1	583.477	4.44074	0.110565	40.164	0	0	UP
HJURP	972.799	5.68542	0.121313	46.8658	0	0	UP
HMGA1	23808.1	5.81463	0.117481	49.4942	0	0	UP
HMGB3	2326.03	3.5288	0.0868664	40.6233	0	0	UP
HMMR	826.352	5.57727	0.118947	46.8887	0	0	UP
HOOK1	1038.87	3.61014	0.0910897	39.6328	0	0	UP
IGSF9	3488.43	4.72922	0.109904	43.0305	0	0	UP
IL4I1	3351.84	7.63512	0.16363	46.6609	0	0	UP
ILDR1	666.962	6.38264	0.141743	45.0297	0	0	UP
IQGAP3	1298.65	5.19463	0.127212	40.8343	0	0	UP
IRF6	2267.26	3.44972	0.0897207	38.4495	0	0	UP
IZUMO4	287.302	-4.47995	0.112936	-39.668	0	0	DOWN
KDF1	1045	6.08906	0.130262	46.7448	0	0	UP
KIAA0101	1032.79	6.36767	0.133306	47.7673	0	0	UP
KIAA0895L	1969.25	-3.80935	0.0933449	-40.8093	0	0	DOWN
KIF11	1601.57	4.70002	0.0933598	50.3431	0	0	UP
KIF14	339.338	4.92207	0.118712	41.4623	0	0	UP
KIF15	453.873	4.15078	0.106154	39.1017	0	0	UP
KIF18A	467.165	4.71598	0.10503	44.901	0	0	UP
KIF18B	900.98	5.85463	0.130715	44.7893	0	0	UP
KIF20A	1658.45	6.50967	0.122165	53.2857	0	0	UP
KIF23	1168.88	3.64884	0.0953018	38.2872	0	0	UP
KIF2C	1464.4	4.74169	0.10244	46.2874	0	0	UP
KIF4A	847.68	5.46129	0.114276	47.7902	0	0	UP
KIFC1	1449.61	3.66981	0.0971007	37.7938	0	0	UP
KLF5	4648.62	3.86184	0.0921233	41.9204	0	0	UP
KLHL14	2805.24	6.04947	0.112204	53.9149	0	0	UP
KPNA2	6556.97	4.11585	0.0997216	41.2734	0	0	UP
KRT18	38677	6.06034	0.108052	56.0872	0	0	UP
KRT7	24345.5	8.60243	0.141235	60.9084	0	0	UP
KRT8	56835.9	7.12478	0.106912	66.6418	0	0	UP
KRTCAP3	1814.92	4.62428	0.112915	40.9537	0	0	UP
LAD1	3065.59	5.89471	0.145653	40.4709	0	0	UP
LAMA2	3461.33	-5.58046	0.136227	-40.9644	0	0	DOWN
LAMC2	5445.88	5.09455	0.120031	42.4436	0	0	UP
LAMP3	1034.17	7.54636	0.18077	41.7457	0	0	UP
LMNB1	2349.29	3.45141	0.0875342	39.4292	0	0	UP
LOC100421166	29.7263	-8.59982	0.224992	-38.2228	0	0	DOWN
LRRC8D	2094.89	2.71947	0.0662489	41.0493	0	0	UP
LRRC8E	392.46	5.65986	0.144365	39.2052	0	0	UP
LSR	11710	5.12829	0.0888147	57.7414	0	0	UP
MAL2	17088.1	6.64067	0.166788	39.8151	0	0	UP
MAP3K5	1963.25	-3.99058	0.0966193	-41.3021	0	0	DOWN
MARVELD2	723.607	5.21304	0.102592	50.8136	0	0	UP
MARVELD3	636.201	3.90787	0.0998997	39.1179	0	0	UP
MCM2	4563.77	3.22047	0.0772167	41.7068	0	0	UP
MECOM	4669.23	4.06798	0.104966	38.7551	0	0	UP
MEG3	34447.3	-7.15519	0.179305	-39.9052	0	0	DOWN
MELK	914.045	5.89707	0.119828	49.2127	0	0	UP
METTL7B	926.351	6.80467	0.165925	41.0105	0	0	UP
MISP	1862.94	6.81065	0.139757	48.7321	0	0	UP
MKI67	4550.04	5.88221	0.137064	42.9158	0	0	UP
MMP15	2846.97	4.34614	0.112383	38.6727	0	0	UP
MMP7	8671.19	9.42525	0.243781	38.6628	0	0	UP
MSLN	34810.3	8.16422	0.169538	48.1557	0	0	UP
MTMR9LP	741.323	-4.68979	0.109928	-42.6623	0	0	DOWN
MUC1	28388.2	5.8241	0.141021	41.2996	0	0	UP
MUC16	37371.3	8.74271	0.197509	44.2648	0	0	UP
MUM1L1	2807.39	-6.74497	0.177221	-38.0596	0	0	DOWN
MYBL2	3872.07	7.34402	0.152124	48.2766	0	0	UP
MYH14	7477.28	6.02924	0.138468	43.5424	0	0	UP
MYO5B	2229.67	4.32031	0.102475	42.1599	0	0	UP
NCAPG	869.56	4.86761	0.112149	43.4031	0	0	UP
NCAPH	753.335	5.32816	0.11444	46.5584	0	0	UP
NDC80	610.637	4.4708	0.115055	38.8578	0	0	UP
NEK2	839.921	7.08946	0.136896	51.7874	0	0	UP
NKTR	4392.09	-2.9939	0.0761192	-39.3317	0	0	DOWN
NOL4L	4253.84	3.04848	0.0702304	43.4068	0	0	UP
NPHP3	1495.32	-3.25575	0.0729516	-44.6289	0	0	DOWN
NR2F6	9885.99	3.61602	0.0934402	38.6988	0	0	UP
NUAK2	3717.93	4.52428	0.100937	44.8227	0	0	UP
NUF2	672.605	4.76477	0.112797	42.2421	0	0	UP
NUP210	4201.96	4.00255	0.0994198	40.2591	0	0	UP
NXPH4	1986.82	8.44763	0.223463	37.8033	0	0	UP
OR7E14P	284.767	5.61792	0.142609	39.3939	0	0	UP
OVOL2	656.894	6.368	0.149443	42.6115	0	0	UP
PAGR1	2754.31	-2.54225	0.065475	-38.8278	0	0	DOWN
PARD6B	1211.91	3.40332	0.080807	42.1166	0	0	UP
PARPBP	492.708	3.42076	0.0900385	37.9922	0	0	UP
PART1	1486.27	7.48495	0.198421	37.7226	0	0	UP
PAX8	17672.5	5.74006	0.136564	42.0321	0	0	UP
PBK	727.343	6.61165	0.150862	43.8259	0	0	UP
PER1	6265.34	-4.14024	0.108705	-38.087	0	0	DOWN
PGM5P2	67.1455	-5.38683	0.137063	-39.302	0	0	DOWN
PKMYT1	1050.22	5.7694	0.121863	47.3432	0	0	UP
PKP3	3454.16	6.14174	0.139944	43.8871	0	0	UP
PLA2G5	707.671	-6.4976	0.169332	-38.372	0	0	DOWN
PLIN5	1498.1	-6.28455	0.154411	-40.7002	0	0	DOWN
PLK1	2422.19	3.8284	0.0913178	41.9239	0	0	UP
PLS1	990.07	4.76763	0.112462	42.3932	0	0	UP
POC1A	633.808	3.99621	0.0876647	45.5851	0	0	UP
POU6F1	724.427	-3.31766	0.0810158	-40.9508	0	0	DOWN
PPP1CA	10054.4	2.77221	0.0675205	41.0572	0	0	UP
PRR11	678.852	4.38805	0.095957	45.7293	0	0	UP
PRR7	1127.68	5.39816	0.115512	46.7323	0	0	UP
PRRG2	368.371	4.91598	0.123771	39.7185	0	0	UP
PRRT2	1747.88	-5.38653	0.140903	-38.2285	0	0	DOWN
PRSS8	7822.46	6.49335	0.157842	41.1384	0	0	UP
PSD4	2623.1	3.53574	0.0760758	46.4765	0	0	UP
PTGS1	11835.6	5.47574	0.125003	43.8048	0	0	UP
PTPN6	2071.72	3.10279	0.0735235	42.2013	0	0	UP
PTTG1	2101.21	5.73079	0.121777	47.0596	0	0	UP
PVRL4	933.745	6.06034	0.156667	38.6829	0	0	UP
RABIF	812.082	2.51828	0.0590357	42.6569	0	0	UP
RACGAP1	2081.43	3.58363	0.0802997	44.6282	0	0	UP
RAD51	430.573	3.80149	0.0951249	39.9631	0	0	UP
RAD51AP1	744.457	4.34627	0.0999228	43.4963	0	0	UP
RAD54L	549.773	4.53378	0.108107	41.9379	0	0	UP
RBM47	4238.45	3.5933	0.0857396	41.9095	0	0	UP
RBM5	6100.26	-2.58948	0.0658664	-39.3142	0	0	DOWN
RBM6	4254.12	-2.70362	0.0688868	-39.2472	0	0	DOWN
RGS19	1287.71	3.52348	0.0871083	40.4495	0	0	UP
RHPN1-AS1	211.357	6.16408	0.162855	37.85	0	0	UP
RHPN2	3420.49	4.32891	0.106637	40.595	0	0	UP
RIPK4	1225.99	5.75041	0.137054	41.9571	0	0	UP
RP11-1000B6.7	38.587	-3.96107	0.102648	-38.5891	0	0	DOWN
RP11-236L14.2	140.057	-6.82672	0.170962	-39.9313	0	0	DOWN
RP11-323N12.5	342.265	10.0789	0.251561	40.0654	0	0	UP
RP11-532F12.5	521.591	5.44426	0.138439	39.3261	0	0	UP
RP11-597D13.9	187.354	-4.69737	0.121235	-38.7461	0	0	DOWN
RRM2	1946.52	5.87913	0.133483	44.044	0	0	UP
RUFY3	1383.83	-2.77294	0.073555	-37.6989	0	0	DOWN
S100A1	13699.9	8.38292	0.178957	46.8431	0	0	UP
SAMD10	1597.16	5.26822	0.113035	46.6068	0	0	UP
SAPCD2	1014.75	5.71875	0.142188	40.2195	0	0	UP
SCNN1A	16845.2	5.16417	0.114065	45.2738	0	0	UP
SERINC2	5250.41	5.99827	0.147063	40.7871	0	0	UP
SGOL1	416.673	5.76559	0.117095	49.2384	0	0	UP
SKA1	341.007	5.83461	0.137021	42.5819	0	0	UP
SKA3	568.725	6.01694	0.120277	50.0256	0	0	UP
SLC12A8	1029.86	5.02753	0.116759	43.0589	0	0	UP
SLC29A2	1636.47	3.86906	0.0862652	44.8508	0	0	UP
SLC34A2	33094.9	10.1716	0.172264	59.0466	0	0	UP
SLC4A3	4451.71	-4.42948	0.111095	-39.8711	0	0	DOWN
SMIM22	2018.82	8.88793	0.182887	48.598	0	0	UP
SMPDL3B	2071.93	8.61274	0.136466	63.1129	0	0	UP
SNRNP70	11638.1	-2.69494	0.0625943	-43.0541	0	0	DOWN
SOX17	7943.37	5.06124	0.105861	47.8101	0	0	UP
SOX9	3338.72	5.86109	0.155826	37.613	0	0	UP
SPC24	879.883	5.54111	0.124117	44.6443	0	0	UP
SPC25	473.883	4.57826	0.11491	39.842	0	0	UP
SPINT1	12786.5	5.64691	0.11784	47.9201	0	0	UP
SRSF5	10997.8	-2.5663	0.0577958	-44.4029	0	0	DOWN
ST14	10904.8	6.08064	0.139294	43.6532	0	0	UP
STARD9	1253.97	-4.59498	0.111269	-41.2961	0	0	DOWN
STAT5B	3051.75	-2.72866	0.0605796	-45.0426	0	0	DOWN
STIL	826.468	3.58159	0.0854763	41.9015	0	0	UP
STXBP2	4188.12	3.58627	0.0873615	41.0509	0	0	UP
SYK	2935.31	4.22147	0.108952	38.7463	0	0	UP
SYNE1	4225.83	-4.86959	0.104662	-46.5267	0	0	DOWN
SYT13	576.262	7.38676	0.193805	38.1145	0	0	UP
SYT17	696.475	4.29552	0.11445	37.5318	0	0	UP
SYTL4	2120.59	-5.17607	0.102024	-50.734	0	0	DOWN
TACSTD2	13452.1	6.37216	0.165944	38.3996	0	0	UP
TBC1D4	1730.78	-3.3959	0.0882223	-38.4925	0	0	DOWN
TCEAL1	1857.22	-3.27339	0.0733694	-44.6152	0	0	DOWN
TCEAL4	7373.84	-3.22287	0.0642854	-50.1338	0	0	DOWN
TJP3	1765.89	6.14534	0.152404	40.3226	0	0	UP
TK1	3075.14	5.7897	0.120172	48.1783	0	0	UP
TMC4	4796.16	5.92881	0.107136	55.3392	0	0	UP
TMEM102	681.28	4.49931	0.104919	42.8838	0	0	UP
TMEM125	1400.75	4.56308	0.103868	43.9313	0	0	UP
TMEM139	1975.39	6.51495	0.116615	55.8671	0	0	UP
TMEM238	1477	7.26218	0.145701	49.8432	0	0	UP
TMPRSS3	3250.5	8.18347	0.155867	52.5031	0	0	UP
TOP2A	3978.17	5.85435	0.125443	46.6694	0	0	UP
TPD52	4037.82	4.45312	0.0906267	49.137	0	0	UP
TPX2	4635.31	6.71516	0.114293	58.7539	0	0	UP
TRIP13	1372.03	3.99783	0.0949198	42.1179	0	0	UP
TROAP	1512.97	4.99121	0.112241	44.4686	0	0	UP
TSPYL2	7827.14	-5.38925	0.0798116	-67.5246	0	0	DOWN
TTC22	1038.97	4.46314	0.11031	40.46	0	0	UP
TTK	972.358	6.05582	0.118089	51.2817	0	0	UP
TUBA1C	19077.3	3.40449	0.0836399	40.7042	0	0	UP
UBE2C	3763.08	7.49907	0.13763	54.4872	0	0	UP
UBE2Q2P1	134.707	-4.10559	0.105556	-38.8949	0	0	DOWN
UBE2T	1121.81	5.42547	0.107719	50.3667	0	0	UP
UCP2	20741.5	6.71404	0.11781	56.9904	0	0	UP
UGT8	633.107	5.75594	0.15022	38.3167	0	0	UP
UHRF1	775.067	4.43391	0.116753	37.9769	0	0	UP
UNC93B1	4860.9	3.40218	0.0891079	38.1805	0	0	UP
VAMP8	5016.13	4.4996	0.10219	44.0319	0	0	UP
VTCN1	5628.02	8.90066	0.208125	42.7659	0	0	UP
WFDC2	59682.3	8.75534	0.155201	56.4131	0	0	UP
WNT10A	2357.61	7.67765	0.195625	39.2468	0	0	UP
WWC1	3464.57	5.08626	0.114738	44.3292	0	0	UP
ZDHHC12	2489.85	3.44217	0.0869362	39.5942	0	0	UP
ZNF514	1036.78	-2.80054	0.0666661	-42.0085	0	0	DOWN
ZNF540	211.53	-4.80478	0.11983	-40.0966	0	0	DOWN
ZWINT	1336.88	3.96416	0.0932134	42.5278	0	0	UP
PNKD	7383.61	2.50729	0.0668315	37.5165	4.95495e-308	4.85338e-306	UP
CTD-2396E7.11	236.004	5.33425	0.14221	37.5098	6.37814e-308	6.22913e-306	UP
MFSD6L	223.841	6.86536	0.183425	37.4286	1.33812e-306	1.30305e-304	UP
PRRG4	1072.29	4.6887	0.125354	37.4037	3.39956e-306	3.30083e-304	UP
WNT7A	1903.83	10.1909	0.272645	37.3778	8.95346e-306	8.66825e-304	UP
TTC30B	978.038	3.04203	0.0814221	37.3612	1.66786e-305	1.61006e-303	UP
CLSPN	304.362	5.23035	0.140017	37.355	2.0997e-305	2.0211e-303	UP
RPL39L	1286.72	4.09586	0.109649	37.3542	2.16644e-305	2.07935e-303	UP
LINC00511	579.76	5.73387	0.153602	37.3294	5.47972e-305	5.24436e-303	UP
RNF43	1387.57	3.75539	0.100685	37.2985	1.73253e-304	1.64866e-302	UP
NACC1	8461.98	3.42899	0.0919542	37.2903	2.36098e-304	2.24031e-302	UP
SAMD12	1094.69	3.49024	0.093631	37.2766	3.93049e-304	3.71904e-302	UP
LYPD6B	2236.38	6.40736	0.172078	37.2353	1.83292e-303	1.72941e-301	UP
SKAP1	625.227	5.34653	0.143763	37.1899	9.95369e-303	9.36516e-301	UP
KIAA1211L	882.838	3.57213	0.096082	37.178	1.54988e-302	1.45415e-300	UP
MND1	207.668	4.9505	0.13318	37.1714	1.9812e-302	1.85361e-300	UP
LINC01224	392.875	7.91403	0.212976	37.1594	3.09568e-302	2.88823e-300	UP
BTAF1	2161.73	-2.62521	0.0706642	-37.1505	4.30233e-302	4.00285e-300	DOWN
MCM10	458.979	4.58035	0.123324	37.1408	6.16402e-302	5.71902e-300	UP
MYCL	2091.95	6.48759	0.174764	37.122	1.24107e-301	1.14828e-299	UP
RP11-440D17.3	699.075	3.23594	0.0871809	37.1175	1.46699e-301	1.35356e-299	UP
UBALD2	4215.05	3.09605	0.0834262	37.1112	1.85448e-301	1.70638e-299	UP
CTD-3035K23.7	243.666	-5.14732	0.138704	-37.1101	1.92969e-301	1.7707e-299	DOWN
PDK4	4695.11	-4.65745	0.125572	-37.0898	4.09599e-301	3.74822e-299	DOWN
SSX2IP	1190.35	2.69011	0.0725581	37.0753	7.03383e-301	6.41904e-299	UP
FAM111B	366.932	5.32592	0.143702	37.0623	1.13876e-300	1.0364e-298	UP
CASP12	35.8001	-5.60611	0.151285	-37.0566	1.4063e-300	1.27641e-298	DOWN
LAPTM4B	28599.5	3.34528	0.0902888	37.0509	1.73587e-300	1.57127e-298	UP
HLF	981.011	-5.92225	0.159914	-37.034	3.25126e-300	2.93501e-298	DOWN
EPHX4	375.843	5.86037	0.158592	36.9525	6.63073e-299	5.96962e-297	UP
NR2F2-AS1	137.959	-5.16215	0.139737	-36.9419	9.84026e-299	8.83533e-297	DOWN
BIK	544.989	6.11107	0.165476	36.9303	1.50646e-298	1.34899e-296	UP
TSPAN15	2215.98	3.85402	0.104436	36.9031	4.12817e-298	3.68677e-296	UP
VANGL1	3056.54	2.75393	0.0746753	36.8787	1.01525e-297	9.04273e-296	UP
SPTBN2	4039	4.20032	0.113899	36.8776	1.05544e-297	9.37576e-296	UP
RCAN3	1234.05	3.57121	0.0969195	36.8472	3.24437e-297	2.87441e-295	UP
RP11-598P20.5	25.292	24.2401	0.65841	36.8161	1.0222e-296	9.03237e-295	UP
S100A14	2611.1	5.88578	0.159875	36.815	1.06261e-296	9.36469e-295	UP
FOXJ1	3470	7.43431	0.202448	36.7221	3.2476e-295	2.85456e-293	UP
MCC	3161.55	-4.45732	0.121502	-36.6852	1.2584e-294	1.10319e-292	DOWN
SHANK2	658.459	5.73849	0.156549	36.6562	3.64434e-294	3.18651e-292	UP
RP11-394O4.5	1247.12	-5.34166	0.145844	-36.6258	1.11213e-293	9.69876e-292	DOWN
POLQ	343.348	4.07483	0.111287	36.6153	1.631e-293	1.41867e-291	UP
RASSF7	3137.58	3.45212	0.0944895	36.5345	3.14721e-292	2.72332e-290	UP
CLDN9	820.017	8.08967	0.221646	36.4982	1.18409e-291	1.02196e-289	UP
GOLGA6L5P	742.685	-4.80098	0.131551	-36.4952	1.31994e-291	1.13627e-289	DOWN
PRSS21	1669.54	7.76463	0.212813	36.4857	1.87048e-291	1.60607e-289	UP
WSB1	5878.55	-3.03465	0.0832013	-36.4736	2.90848e-291	2.49093e-289	DOWN
ABRACL	1150.65	3.79721	0.104257	36.4215	1.9429e-290	1.65548e-288	UP
ARHGAP10	871.467	-3.4622	0.0951293	-36.3947	5.16795e-290	4.39224e-288	DOWN
TACC3	2991.62	3.42004	0.0939829	36.3901	6.11428e-290	5.18333e-288	UP
DENND2D	1720.54	2.89079	0.0794965	36.3637	1.5963e-289	1.34982e-287	UP
GPR160	1052.5	5.76221	0.158565	36.3396	3.82992e-289	3.23038e-287	UP
GOLGA6L4	465.363	-4.52651	0.124562	-36.3394	3.85999e-289	3.24754e-287	DOWN
TAF1C	3023.73	-2.53231	0.0696939	-36.3348	4.57042e-289	3.8356e-287	DOWN
MTL5	851.173	3.44938	0.0949667	36.322	7.2843e-289	6.09781e-287	UP
XRCC2	370.16	3.50407	0.0964774	36.3201	7.80238e-289	6.51518e-287	UP
RP11-449J21.5	218.312	6.51358	0.179634	36.2603	6.84651e-288	5.70275e-286	UP
PPT2-EGFL8	467.672	-3.32697	0.0918055	-36.2394	1.46135e-287	1.21419e-285	DOWN
PLEKHG6	552.027	5.43504	0.150023	36.2281	2.20176e-287	1.82483e-285	UP
RP4-568C11.4	545.759	5.05015	0.139442	36.2169	3.29792e-287	2.72658e-285	UP
EYA2	5227.4	6.56661	0.181367	36.2061	4.87847e-287	4.02336e-285	UP
GLDC	1739.2	7.50737	0.207441	36.1904	8.61583e-287	7.08811e-285	UP
HID1	5548.75	4.16841	0.115181	36.1902	8.68658e-287	7.12876e-285	UP
CSPG4P12	818.366	-3.76772	0.10419	-36.1619	2.41739e-286	1.979e-284	DOWN
RP11-216L13.19	197.455	-3.65661	0.101187	-36.137	5.95527e-286	4.86337e-284	DOWN
EHF	2452.61	6.13513	0.169783	36.1351	6.36738e-286	5.18724e-284	UP
RASAL1	938.704	5.84064	0.161705	36.119	1.14211e-285	9.28166e-284	UP
RP11-213G2.3	62.5386	-2.93133	0.081202	-36.0993	2.32929e-285	1.88379e-283	DOWN
KSR2	225.701	6.69361	0.185472	36.0896	3.29902e-285	2.66161e-283	UP
MAP7	1312.83	2.95128	0.0818138	36.0731	5.9914e-285	4.82214e-283	UP
NEIL3	169.288	5.93165	0.164435	36.0729	6.04576e-285	4.85419e-283	UP
CASC5	342.734	4.00169	0.111017	36.0456	1.61551e-284	1.294e-282	UP
ABCA8	1881.48	-6.46546	0.179398	-36.0398	1.99111e-284	1.59103e-282	DOWN
DOK5	2976.68	5.91558	0.164227	36.0208	3.95266e-284	3.1434e-282	UP
TBC1D2B	3196.88	-2.80795	0.077996	-36.0012	8.00585e-284	6.35163e-282	DOWN
KRT8P3	237.592	6.48803	0.180634	35.9181	1.59228e-282	1.2573e-280	UP
MAD2L1	1236.75	3.57318	0.0995342	35.899	3.1668e-282	2.49468e-280	UP
LAMB3	3119.94	4.84125	0.134912	35.8844	5.35042e-282	4.20493e-280	UP
MRGPRF-AS1	18.5577	-5.86268	0.163584	-35.839	2.73216e-281	2.13217e-279	DOWN
RP11-522B15.6	5.2846	-6.40145	0.178621	-35.8382	2.8066e-281	2.18516e-279	DOWN
SESN1	1379.6	-2.74889	0.0767139	-35.833	3.38392e-281	2.62852e-279	DOWN
AC007796.1	3.85876	-6.39651	0.178516	-35.8315	3.56732e-281	2.76455e-279	DOWN
DSC2	3502.65	5.03949	0.140847	35.7799	2.26708e-280	1.75284e-278	UP
CHCHD10	5974.97	4.63112	0.129549	35.7481	7.09072e-280	5.46968e-278	UP
USP43	267.213	3.69037	0.103297	35.726	1.56035e-279	1.20086e-277	UP
KLK8	3436.54	6.88925	0.192847	35.7239	1.68011e-279	1.29005e-277	UP
SCGB2A1	2949.7	9.27034	0.259619	35.7075	3.02374e-279	2.31642e-277	UP
TLCD1	527.293	4.51891	0.126576	35.701	3.81367e-279	2.91488e-277	UP
FAM193B	2529.94	-2.52596	0.0707829	-35.6861	6.50435e-279	4.94879e-277	DOWN
XPR1	7810.38	3.0269	0.0848412	35.6773	8.90459e-279	6.7596e-277	UP
AC012360.6	119.235	-5.47213	0.153842	-35.5699	4.09565e-277	3.09499e-275	DOWN
SHROOM3	3152.05	3.9211	0.110283	35.5548	7.01058e-277	5.28579e-275	UP
MYB	483.322	5.64813	0.159096	35.5015	4.65773e-276	3.5039e-274	UP
KCNK15	4682.62	4.78382	0.134976	35.4421	3.84123e-275	2.88317e-273	UP
LINC00304	21.3291	-6.29097	0.177532	-35.4358	4.80571e-275	3.599e-273	DOWN
SBK1	1912.08	4.65686	0.131449	35.4271	6.53889e-275	4.88603e-273	UP
MCM4	4190.59	2.71237	0.076617	35.4016	1.61056e-274	1.20077e-272	UP
FAAH2	359.444	3.79266	0.107192	35.3818	3.24909e-274	2.41699e-272	UP
ARL4C	6558.93	4.59749	0.130054	35.3507	9.77961e-274	7.25886e-272	UP
LINC01132	221.394	5.99187	0.169542	35.3414	1.35691e-273	1.00492e-271	UP
MAMDC2	1326.05	-5.0913	0.144067	-35.3398	1.43756e-273	1.0623e-271	DOWN
TNNT1	2853.77	5.86207	0.166105	35.2914	7.95655e-273	5.8666e-271	UP
CXCL16	6456.98	3.44601	0.0976986	35.2718	1.58739e-272	1.16528e-270	UP
RP11-752D24.2	57.8788	-6.22757	0.176602	-35.2633	2.14689e-272	1.57255e-270	DOWN
ESCO2	304.286	4.90855	0.139544	35.1757	4.71216e-271	3.444e-269	UP
HAND2-AS1	498.764	-6.5153	0.185325	-35.1561	9.38341e-271	6.84313e-269	DOWN
BLACAT1	602.802	5.33793	0.151844	35.1542	1.00384e-270	7.30484e-269	UP
KCTD14	1201.28	5.0813	0.144579	35.1455	1.36232e-270	9.8919e-269	UP
RP3-325F22.5	149.652	4.58423	0.130679	35.0801	1.35657e-269	9.80751e-268	UP
MT1F	2125.27	5.79699	0.165278	35.0743	1.6649e-269	1.20107e-267	UP
CTB-50L17.14	207.094	-6.80641	0.194261	-35.0375	6.04049e-269	4.34824e-267	DOWN
TMEM184A	997.043	4.36705	0.12467	35.0289	8.17033e-269	5.86876e-267	UP
THEM6	4008.81	3.67258	0.104892	35.0131	1.41945e-268	1.0174e-266	UP
MIR143HG	600.203	-5.19575	0.148404	-35.0109	1.53554e-268	1.09826e-266	DOWN
HSH2D	730.846	5.16422	0.14769	34.9666	7.25604e-268	5.17861e-266	UP
RP11-283G6.5	393.797	9.82188	0.2809	34.9657	7.46951e-268	5.3196e-266	UP
KLF3-AS1	430.292	-4.24552	0.121476	-34.9496	1.31305e-267	9.33132e-266	DOWN
ADGRG1	10413.6	4.0416	0.115717	34.9267	2.92801e-267	2.0764e-265	UP
PRMT9	645.076	-2.98804	0.0855635	-34.9219	3.46042e-267	2.44876e-265	DOWN
RP11-295M3.4	1294.76	6.75661	0.193498	34.9183	3.92371e-267	2.77074e-265	UP
PAQR4	1385.09	4.66251	0.133554	34.9112	5.03585e-267	3.54857e-265	UP
SLPI	37149.9	6.93669	0.198889	34.8772	1.64791e-266	1.15392e-264	UP
CSGALNACT1	625.542	-3.67752	0.105588	-34.8289	8.89369e-266	6.20163e-264	DOWN
RP11-327J17.9	53.3557	-6.60789	0.18978	-34.8186	1.27035e-265	8.83976e-264	DOWN
CENPN	454.001	3.12123	0.089707	34.7935	3.04528e-265	2.11466e-263	UP
BEND3	762.104	2.80997	0.0807647	34.7921	3.20019e-265	2.21763e-263	UP
TFAP2C	1404.47	5.3755	0.154622	34.7653	8.13292e-265	5.62418e-263	UP
ADHFE1	682.351	-3.88698	0.111842	-34.7543	1.19414e-264	8.24077e-263	DOWN
TDRKH	723.032	2.94884	0.0848703	34.7452	1.63635e-264	1.12692e-262	UP
PRR15L	1036.8	5.93482	0.170848	34.7375	2.13751e-264	1.46904e-262	UP
GGT6	1188.58	4.82254	0.13888	34.7244	3.37549e-264	2.31509e-262	UP
PPP1R14B	7781.63	3.11383	0.089694	34.7161	4.50037e-264	3.08026e-262	UP
PNPLA7	1075.87	-4.355	0.125462	-34.7118	5.23745e-264	3.572e-262	DOWN
RP11-689P11.2	105.201	-4.58558	0.132105	-34.7117	5.24021e-264	3.572e-262	DOWN
PSAT1	5896.64	4.44173	0.127989	34.7039	6.88071e-264	4.68071e-262	UP
FXYD3	3211.4	6.18733	0.178303	34.7011	7.57189e-264	5.14042e-262	UP
CKS1B	4198.28	3.15593	0.0909721	34.6911	1.07253e-263	7.26642e-262	UP
ZNF471	678.34	-3.2134	0.0927397	-34.6497	4.51285e-263	3.05129e-261	DOWN
AC009501.4	69.354	-3.85381	0.1114	-34.5944	3.06543e-262	2.05187e-260	DOWN
JUP	27284	2.63674	0.0762663	34.5727	6.49012e-262	4.32688e-260	UP
ZNF331	2750.24	-3.90448	0.113003	-34.5519	1.33551e-261	8.88594e-260	DOWN
LRRTM1	3083.03	7.54724	0.218515	34.5387	2.1038e-261	1.39423e-259	UP
M1AP	402.412	5.48778	0.158999	34.5146	4.84685e-261	3.20574e-259	UP
C16orf59	365.29	3.49288	0.101371	34.4562	3.63182e-260	2.39736e-258	UP
ZNF695	155.562	4.79763	0.13938	34.4212	1.21543e-259	8.00724e-258	UP
VGLL1	816.48	10.2508	0.297989	34.3999	2.52699e-259	1.6615e-257	UP
HKDC1	499.064	6.45121	0.187675	34.3743	6.10336e-259	3.99722e-257	UP
MLK4	931.978	3.38828	0.098663	34.342	1.855e-258	1.2125e-256	UP
CDC6	583.351	3.28601	0.0959053	34.2631	2.78639e-257	1.81774e-255	UP
GOLGA8R	112.359	-4.4947	0.131196	-34.2595	3.15017e-257	2.05105e-255	DOWN
CENPK	337.379	3.45948	0.100981	34.2586	3.24609e-257	2.10939e-255	UP
TGFBR3	3847.83	-3.5587	0.103943	-34.2371	6.78813e-257	4.40253e-255	DOWN
TTLL3	3618.55	-3.51803	0.102787	-34.2263	9.83197e-257	6.3643e-255	DOWN
CDK5	964.691	2.82866	0.0827111	34.1993	2.47638e-256	1.59988e-254	UP
CTCFL	1458.4	9.52387	0.278527	34.1937	2.99503e-256	1.93121e-254	UP
GJB3	482.234	5.93283	0.173576	34.1799	4.8095e-256	3.09523e-254	UP
SLC44A4	3297.83	4.74209	0.138897	34.141	1.81639e-255	1.16672e-253	UP
SPA17	664.122	3.65325	0.107058	34.1242	3.23196e-255	2.07199e-253	UP
TUBGCP6	2272.38	-2.66216	0.0780506	-34.1081	5.59276e-255	3.57862e-253	DOWN
RRN3P2	104.244	-3.56478	0.10469	-34.0508	3.94457e-254	2.51436e-252	DOWN
FAM64A	518.709	4.13135	0.12143	34.0225	1.03593e-253	6.59068e-252	UP
ALDH3B2	2502.4	7.00776	0.205976	34.0222	1.04518e-253	6.63691e-252	UP
CCNA1	1668.63	6.4201	0.188738	34.0158	1.29935e-253	8.21959e-252	UP
HOXB7	904.135	5.53173	0.162631	34.0141	1.37943e-253	8.70973e-252	UP
GUSBP11	1114.83	-3.54383	0.1042	-34.01	1.58503e-253	9.98897e-252	DOWN
N4BP2L2-IT2	181.741	-3.81716	0.112284	-33.9955	2.59738e-253	1.63381e-251	DOWN
ANXA3	2246.13	4.2245	0.1244	33.959	8.9877e-253	5.63223e-251	UP
ZBTB42	1392.2	3.46414	0.102159	33.9095	4.82882e-252	3.01472e-250	UP
NBPF8	1131.47	-2.65381	0.078263	-33.9088	4.93522e-252	3.07539e-250	DOWN
KREMEN2	536.978	7.68692	0.226764	33.8984	7.03716e-252	4.37706e-250	UP
F2RL1	883.221	4.34781	0.128296	33.8889	9.72252e-252	6.0361e-250	UP
CYBA	11618.3	3.73911	0.110413	33.8648	2.19565e-251	1.35809e-249	UP
CAPN13	601.68	8.27091	0.244516	33.8256	8.28841e-251	5.10777e-249	UP
CD9	26308.4	3.62867	0.107301	33.8177	1.08491e-250	6.67349e-249	UP
PPM1K	1413.78	-3.0482	0.0901447	-33.8145	1.20711e-250	7.41154e-249	DOWN
DCTPP1	3172.3	2.82732	0.0836474	33.8005	1.93811e-250	1.18779e-248	UP
ADAMTS4	4357.59	-5.65664	0.167465	-33.778	4.14906e-250	2.53815e-248	DOWN
SMKR1	255.512	5.0125	0.148452	33.7652	6.40548e-250	3.91132e-248	UP
RPS6KA1	1552.26	2.93538	0.0869366	33.7646	6.52376e-250	3.97628e-248	UP
PRR36	2071.77	4.68038	0.1387	33.7446	1.28139e-249	7.79593e-248	UP
KRT80	1469.38	5.68466	0.168602	33.7164	3.32418e-249	2.01875e-247	UP
SPP1	19061	5.53596	0.164288	33.6966	6.47933e-249	3.9277e-247	UP
RBBP8NL	319.687	6.54825	0.194473	33.6717	1.49869e-248	9.06845e-247	UP
MACC1	1210.49	5.7555	0.171109	33.6364	4.93436e-248	2.98033e-246	UP
FAM181A	406.83	8.73107	0.259669	33.6239	7.51975e-248	4.5337e-246	UP
LINC00958	323.174	6.53823	0.194798	33.5642	5.59023e-247	3.35826e-245	UP
WFIKKN2	3355.53	-8.73343	0.260248	-33.5581	6.85498e-247	4.10328e-245	DOWN
ASRGL1	3630.4	5.19811	0.154929	33.5516	8.52591e-247	5.09435e-245	UP
KLK7	12331	7.06002	0.210572	33.5278	1.89997e-246	1.13323e-244	UP
KLHDC1	241.718	-2.86154	0.0854263	-33.4972	5.29248e-246	3.15105e-244	DOWN
KCNC3	1241.02	4.83746	0.144423	33.4951	5.67279e-246	3.37148e-244	UP
CBX7	2163.81	-3.20912	0.0958875	-33.4676	1.42962e-245	8.48148e-244	DOWN
SIGLEC16	483.701	-5.78176	0.172759	-33.4672	1.44581e-245	8.56233e-244	DOWN
RNASE4	1172.39	-3.87734	0.115909	-33.4517	2.42775e-245	1.43521e-243	DOWN
E2F3	1193.91	2.67104	0.0798925	33.4329	4.56811e-245	2.69575e-243	UP
CCDC68	333.85	-4.26075	0.127461	-33.4278	5.41518e-245	3.18999e-243	DOWN
LL0XNC01-116E7.1	6.28715	-5.42497	0.162315	-33.4226	6.44952e-245	3.79261e-243	DOWN
TMEM150C	523.71	-3.68146	0.110199	-33.4075	1.06642e-244	6.24906e-243	DOWN
ASS1	27277	3.414	0.10229	33.3756	3.09506e-244	1.81047e-242	UP
SEL1L3	3533.02	3.02912	0.0907741	33.3699	3.7532e-244	2.19162e-242	UP
SLC4A11	1698.69	5.61424	0.168312	33.3562	5.92539e-244	3.454e-242	UP
CSDC2	2369.03	-5.62885	0.168787	-33.3489	7.54894e-244	4.39272e-242	DOWN
GOLGA8M	50.194	-6.98251	0.20941	-33.3438	8.96713e-244	5.20889e-242	DOWN
C9orf16	6901.4	3.23696	0.0970896	33.3399	1.02053e-243	5.91784e-242	UP
C1orf116	1074.65	6.42424	0.192705	33.3371	1.11859e-243	6.47523e-242	UP
RHBG	253.609	-7.19472	0.216036	-33.3033	3.4636e-243	1.99462e-241	DOWN
OCIAD2	2200.4	3.02732	0.0910297	33.2564	1.65078e-242	9.49014e-241	UP
RHPN1	2232.73	3.6024	0.108379	33.2391	2.93836e-242	1.68632e-240	UP
CSPG5	404.929	4.89549	0.147318	33.2308	3.8623e-242	2.20898e-240	UP
NMU	679.68	6.82544	0.2054	33.2299	3.98178e-242	2.27343e-240	UP
RRN3P1	428.23	-3.05693	0.0920375	-33.214	6.75432e-242	3.84985e-240	DOWN
BCL11A	1270.91	5.06075	0.152539	33.1768	2.32642e-241	1.32151e-239	UP
MTFR2	202.581	3.93459	0.118612	33.172	2.72574e-241	1.54571e-239	UP
FOXQ1	842.488	6.95822	0.209787	33.168	3.12083e-241	1.76676e-239	UP
SLC1A7	104.688	-5.55655	0.167536	-33.1663	3.29509e-241	1.86225e-239	DOWN
MTMR11	1129.73	-2.96946	0.0895513	-33.1593	4.15707e-241	2.34545e-239	DOWN
TSPAN1	2450.35	6.44156	0.194399	33.1358	9.06692e-241	5.10698e-239	UP
PSENEN	5001.87	2.93952	0.0887319	33.1282	1.16786e-240	6.55593e-239	UP
CCDC167	1312.3	3.56713	0.107786	33.0946	3.55494e-240	1.99226e-238	UP
RP11-640N20.4	64.4345	-3.16462	0.0956624	-33.0812	5.54549e-240	3.10259e-238	DOWN
LYPD1	11367.5	6.6355	0.200618	33.0753	6.73352e-240	3.76097e-238	UP
RTKN	3310.32	2.58724	0.0782476	33.0647	9.55455e-240	5.32774e-238	UP
ADAMTS9-AS2	181.679	-5.12862	0.155119	-33.0624	1.03315e-239	5.75139e-238	DOWN
KRT23	1926.95	6.95412	0.210369	33.0568	1.24227e-239	6.90399e-238	UP
SGPP2	1594.01	4.60631	0.13945	33.0321	2.81367e-239	1.56112e-237	UP
GAPDH	240131	2.69249	0.0815713	33.0078	6.27113e-239	3.47367e-237	UP
ITGB6	913.416	6.36788	0.193277	32.947	4.66949e-238	2.58221e-236	UP
GSTM5	1695.04	-6.45874	0.196039	-32.9462	4.79394e-238	2.64665e-236	DOWN
C6orf223	377.593	8.07111	0.24499	32.9447	5.03481e-238	2.77505e-236	UP
RTKN2	357.002	3.52972	0.107168	32.9364	6.6208e-238	3.63719e-236	UP
PRSS22	474.657	5.88818	0.178884	32.9162	1.28845e-237	7.06661e-236	UP
HTR3A	1510.15	10.5432	0.320682	32.8773	4.63361e-237	2.53717e-235	UP
LYPD6	666.702	3.64199	0.110884	32.845	1.34052e-236	7.32809e-235	UP
WHAMMP3	116.271	-4.03162	0.122768	-32.8395	1.60985e-236	8.78606e-235	DOWN
S100A11	28515	3.73862	0.113877	32.8302	2.18117e-236	1.18847e-234	UP
PDZK1IP1	3137.61	6.8679	0.209369	32.8029	5.35278e-236	2.91186e-234	UP
CACNA1H	4124.92	-5.44825	0.166221	-32.7771	1.24745e-235	6.775e-234	DOWN
TYMS	1873.35	3.67793	0.11224	32.7683	1.66521e-235	9.02917e-234	UP
ADM2	217.772	5.47724	0.167225	32.7538	2.68286e-235	1.45e-233	UP
SLC25A27	956.85	-4.01039	0.122446	-32.7522	2.82542e-235	1.52458e-233	DOWN
UNC5B-AS1	469.463	6.5341	0.199509	32.7509	2.94537e-235	1.58675e-233	UP
RP11-680F8.1	354.719	4.82701	0.147392	32.7494	3.0973e-235	1.66591e-233	UP
B3GNT3	1157.88	6.45364	0.197139	32.7364	4.73563e-235	2.54301e-233	UP
PPP1R12B	2588.59	-3.17134	0.0969733	-32.7033	1.40343e-234	7.52422e-233	DOWN
ATG16L2	1386.32	-2.99573	0.0916218	-32.6967	1.73772e-234	9.30152e-233	DOWN
RAB25	3245.28	6.5154	0.199533	32.6532	7.21615e-234	3.85642e-232	UP
RP4-742C19.13	98.0462	-4.25231	0.130239	-32.6501	7.99798e-234	4.26742e-232	DOWN
LCN2	14475.9	7.58021	0.232532	32.5985	4.30491e-233	2.28962e-231	UP
C4BPB	546.304	-7.76275	0.238313	-32.5737	9.6612e-233	5.12212e-231	DOWN
SFN	1373.73	5.29852	0.162718	32.5626	1.38857e-232	7.33855e-231	UP
APBB3	1489.54	-2.63701	0.0810084	-32.5524	1.93927e-232	1.02167e-230	DOWN
UGT2B7	781.788	7.59642	0.233467	32.5374	3.15659e-232	1.66036e-230	UP
MCF2	74.1083	-5.84662	0.179693	-32.5367	3.22882e-232	1.69569e-230	DOWN
DNAJC22	458.248	5.49501	0.168966	32.5213	5.33362e-232	2.79668e-230	UP
HSPD1P11	17.1388	-6.31614	0.194257	-32.5143	6.699e-232	3.50162e-230	DOWN
SCML1	1077.78	-3.35954	0.103354	-32.5054	8.95171e-232	4.67182e-230	DOWN
GALNT6	2112.04	3.82129	0.117564	32.5038	9.41532e-232	4.9061e-230	UP
KRT17	3427.25	6.25211	0.192413	32.4931	1.33471e-231	6.94405e-230	UP
XXbac-BPGBPG55C20.2	332.337	-3.0931	0.0951963	-32.4918	1.3931e-231	7.23656e-230	DOWN
RP11-1212A22.4	2017.38	-2.86456	0.0881633	-32.4915	1.40583e-231	7.29135e-230	DOWN
GPR39	275.778	5.56673	0.171344	32.4886	1.54442e-231	7.99768e-230	UP
ERBB4	1375.03	5.521	0.170046	32.4677	3.05085e-231	1.57742e-229	UP
C11orf96	5893.67	-5.22662	0.161067	-32.4499	5.4334e-231	2.80496e-229	DOWN
ABHD17C	1151.67	3.06993	0.0946284	32.442	7.03036e-231	3.62378e-229	UP
GPRIN1	258.828	4.86665	0.150045	32.4346	8.92082e-231	4.58407e-229	UP
TMPRSS4	3420.08	7.17034	0.221071	32.4346	8.9392e-231	4.58646e-229	UP
NIPAL1	213.922	4.4911	0.1385	32.4266	1.15692e-230	5.92672e-229	UP
EGFL8	828.227	-3.48941	0.107657	-32.4122	1.84546e-230	9.43952e-229	DOWN
CTC-439O9.1	48.2942	-6.31041	0.194808	-32.3929	3.45583e-230	1.76226e-228	DOWN
WIPF3	1743.12	-4.19558	0.129603	-32.3725	6.68871e-230	3.39528e-228	DOWN
SH3BP5-AS1	1281.08	-3.38902	0.104707	-32.3668	8.04541e-230	4.07777e-228	DOWN
RP11-7K24.3	216.651	5.70142	0.17629	32.3411	1.84878e-229	9.35621e-228	UP
TRIM29	4506.92	6.09926	0.188594	32.3407	1.87206e-229	9.45971e-228	UP
PRDM5	349.872	-3.57022	0.110396	-32.3401	1.91426e-229	9.65833e-228	DOWN
ZNF577	756.891	-2.9463	0.0911367	-32.3284	2.79009e-229	1.40561e-227	DOWN
KANK2	6254.57	-2.61304	0.0808617	-32.315	4.31061e-229	2.16835e-227	DOWN
GOLGA6L17P	12.3215	-6.13615	0.189986	-32.2978	7.50648e-229	3.77028e-227	DOWN
KLF9	2852.64	-3.4084	0.105554	-32.2905	9.50484e-229	4.76683e-227	DOWN
OASL	825.926	5.50329	0.170433	32.2901	9.63965e-229	4.82719e-227	UP
GRHL3	288.091	5.44221	0.168669	32.2657	2.1212e-228	1.05905e-226	UP
ZBED2	1126.52	6.70899	0.20802	32.2516	3.34002e-228	1.66508e-226	UP
PLEKHH2	1417.92	-4.23597	0.131392	-32.2392	4.97838e-228	2.47813e-226	DOWN
AP1S3	193.433	3.48622	0.108208	32.2178	9.94968e-228	4.94537e-226	UP
MRPL14	2280.26	2.58753	0.0803261	32.2128	1.16655e-227	5.78961e-226	UP
FAM84B	3736.24	3.20647	0.0995454	32.2112	1.23131e-227	6.10195e-226	UP
GPR78	323.256	-5.76265	0.178946	-32.2034	1.58297e-227	7.83303e-226	DOWN
RP11-22C11.2	129.366	7.82091	0.243052	32.1779	3.59589e-227	1.77672e-225	UP
CNTNAP1	821.986	-3.24697	0.100982	-32.1539	7.78891e-227	3.8428e-225	DOWN
PLEKHB1	2735.4	4.24383	0.132087	32.1292	1.72451e-226	8.49563e-225	UP
GSG2	175.099	3.78732	0.11798	32.1013	4.22278e-226	2.07419e-224	UP
CCDC58	1087.66	2.52316	0.0786464	32.0823	7.77264e-226	3.81224e-224	UP
CASP9	1399.89	-2.53876	0.0791349	-32.0814	8.01807e-226	3.92685e-224	DOWN
RP11-256I23.2	59.7742	-4.15547	0.129551	-32.0761	9.50267e-226	4.64713e-224	DOWN
CDH6	6837.06	5.68864	0.177401	32.0666	1.28978e-225	6.29822e-224	UP
TTC39A	771.515	5.02929	0.156865	32.0613	1.53009e-225	7.46079e-224	UP
SLC25A10	2101.36	2.82571	0.0882106	32.0337	3.7055e-225	1.80419e-223	UP
TRPM2-AS	169.062	5.97223	0.186659	31.9955	1.26e-224	6.11705e-223	UP
CKMT1B	813.43	6.00356	0.18764	31.9952	1.2728e-224	6.17022e-223	UP
CTH	521.472	-3.77155	0.117918	-31.9845	1.79286e-224	8.67874e-223	DOWN
E2F7	282.486	4.61876	0.144408	31.984	1.81761e-224	8.7858e-223	UP
UPK1B	849.786	7.93447	0.248459	31.9347	8.8143e-224	4.24829e-222	UP
IDH2	7133.15	2.90877	0.0911228	31.9215	1.34387e-223	6.46781e-222	UP
PDE7B	439.486	-3.70443	0.116054	-31.9197	1.42091e-223	6.82875e-222	DOWN
TNFSF15	206.873	4.60929	0.144419	31.9161	1.59594e-223	7.65892e-222	UP
ITPR1	1664.96	-3.716	0.116437	-31.9142	1.69812e-223	8.13756e-222	DOWN
CCDC183	127.618	-3.36987	0.105604	-31.9104	1.91739e-223	9.17517e-222	DOWN
TTC14	2165.41	-2.90897	0.0911747	-31.9054	2.24713e-223	1.07377e-221	DOWN
NCAPD2	6776.12	2.5997	0.0815261	31.8879	3.92413e-223	1.86976e-221	UP
SCN7A	1488.55	-6.94734	0.217904	-31.8825	4.66652e-223	2.22032e-221	DOWN
KLK6	10351.8	6.76103	0.212081	31.8794	5.15388e-223	2.44872e-221	UP
PMAIP1	386.923	4.08696	0.12824	31.8697	7.0214e-223	3.33128e-221	UP
HERC2P9	1053.55	-2.56071	0.0804349	-31.8358	2.06665e-222	9.79122e-221	DOWN
PEAR1	623.123	-3.98563	0.125244	-31.8228	3.12886e-222	1.48027e-220	DOWN
ATP8A1	1019.28	-3.43294	0.107888	-31.8193	3.49679e-222	1.652e-220	DOWN
CDCA4	1756.54	2.6866	0.0844648	31.8074	5.12152e-222	2.41616e-220	UP
KLK11	3951.04	5.90375	0.185823	31.7709	1.63405e-221	7.69802e-220	UP
PNISR	6862.69	-2.6327	0.0829125	-31.7527	2.91379e-221	1.37075e-219	DOWN
SYNE4	722.352	3.37439	0.106303	31.7432	3.93745e-221	1.84971e-219	UP
PAK6	511.903	3.21379	0.101263	31.7372	4.76793e-221	2.23671e-219	UP
TNFRSF12A	3104.15	3.7935	0.119536	31.7353	5.06133e-221	2.37102e-219	UP
RP11-283G6.4	412.568	8.83744	0.27869	31.7106	1.11034e-220	5.19419e-219	UP
AIM1L	237.232	5.44927	0.171873	31.7051	1.32004e-220	6.16652e-219	UP
RP11-1149O23.3	122.718	4.3176	0.136186	31.7036	1.38442e-220	6.45822e-219	UP
RP11-303E16.2	161.47	3.67377	0.115898	31.6984	1.6366e-220	7.62402e-219	UP
RP11-295G20.2	379.452	4.17245	0.131633	31.6975	1.68155e-220	7.82248e-219	UP
STXBP5L	263.118	-6.15932	0.194578	-31.6548	6.50431e-220	3.02156e-218	DOWN
RP11-126K1.8	33.0103	22.5768	0.713533	31.6408	1.01517e-219	4.70938e-218	UP
CAPG	5374.71	3.36509	0.106376	31.6339	1.26298e-219	5.85089e-218	UP
RP11-85K15.3	36.6399	-3.00878	0.0951316	-31.6276	1.54193e-219	7.12336e-218	DOWN
TTC9	991.329	5.0135	0.158548	31.6213	1.87894e-219	8.65636e-218	UP
ORC6	452.387	2.97329	0.0940318	31.6201	1.95524e-219	8.99545e-218	UP
MREG	746.684	3.05839	0.0967257	31.6192	2.01181e-219	9.24297e-218	UP
CIT	961.864	3.25439	0.102958	31.6089	2.7817e-219	1.27451e-217	UP
GPX1	20322.4	2.71365	0.0858508	31.6089	2.78779e-219	1.27555e-217	UP
CENPU	638.812	3.51517	0.111235	31.6013	3.53931e-219	1.61498e-217	UP
OXER1	122.189	-3.73886	0.118324	-31.5986	3.85742e-219	1.75773e-217	DOWN
CCNF	923.967	2.77985	0.0880092	31.5859	5.7657e-219	2.62014e-217	UP
RP11-469H8.6	195.505	8.97537	0.28426	31.5745	8.26298e-219	3.7448e-217	UP
CTSV	686.319	5.49845	0.174224	31.5597	1.31989e-218	5.97364e-217	UP
MYO15B	5668.81	-4.03389	0.127837	-31.5549	1.53794e-218	6.95113e-217	DOWN
RP3-416H24.1	205.524	6.19019	0.19618	31.5537	1.59587e-218	7.20322e-217	UP
ATP5J2	10704.1	3.1588	0.100127	31.548	1.9075e-218	8.59816e-217	UP
EXOSC4	2114.94	3.00286	0.0952637	31.5215	4.40889e-218	1.98465e-216	UP
CTD-2373N4.3	85.7488	-4.56451	0.144838	-31.5146	5.48671e-218	2.46651e-216	DOWN
LINC00924	117.745	-5.19215	0.164785	-31.5086	6.61269e-218	2.96869e-216	DOWN
YPEL4	308.709	-3.79505	0.120559	-31.4788	1.69653e-217	7.60613e-216	DOWN
ENGASE	1513.7	-2.87505	0.0913374	-31.4773	1.77878e-217	7.96421e-216	DOWN
RP11-182J1.12	56.1869	-4.25091	0.135064	-31.4734	2.01079e-217	8.99094e-216	DOWN
SRD5A3	2453.59	3.7589	0.119687	31.4061	1.67114e-216	7.45231e-215	UP
RP11-258C19.7	277.867	-2.76608	0.0882363	-31.3486	1.01659e-215	4.52735e-214	DOWN
KCTD7	939.09	-2.58024	0.0823471	-31.3336	1.6252e-215	7.21854e-214	DOWN
HN1	3381.68	3.08894	0.0986015	31.3275	1.9722e-215	8.74815e-214	UP
PITPNM2	1411.75	-3.18732	0.101838	-31.2979	4.97692e-215	2.20469e-213	DOWN
TDRD10	148.395	-4.95845	0.158432	-31.297	5.13342e-215	2.27101e-213	DOWN
PERP	7878.02	3.26172	0.104288	31.2762	9.84373e-215	4.34908e-213	UP
VLDLR	2798.35	-3.37019	0.107804	-31.2621	1.52934e-214	6.74789e-213	DOWN
CRABP1	5117.61	9.17291	0.293638	31.2389	3.16192e-214	1.39145e-212	UP
NR2F2	7856.74	-2.87769	0.0921415	-31.2312	4.02351e-214	1.76828e-212	DOWN
TMEM45B	422.554	5.43694	0.174256	31.2009	1.03673e-213	4.55031e-212	UP
CTD-3092A11.2	413.439	-3.01255	0.0965771	-31.1932	1.31574e-213	5.75978e-212	DOWN
TRPC1	539.957	-3.25207	0.104278	-31.1866	1.61878e-213	7.07707e-212	DOWN
GYLTL1B	2555.95	3.58756	0.115047	31.1833	1.79487e-213	7.83666e-212	UP
PNOC	2623.49	7.61054	0.244258	31.1578	3.98087e-213	1.72906e-211	UP
IFFO1	652.193	-3.39187	0.108873	-31.1545	4.4115e-213	1.90866e-211	DOWN
BOLA2B	1628.62	3.37442	0.108319	31.1527	4.6629e-213	2.01482e-211	UP
ERP27	1846.35	6.57397	0.211099	31.1417	6.57277e-213	2.8364e-211	UP
MMEL1	268.225	4.98137	0.160207	31.0932	2.97469e-212	1.27709e-210	UP
TMEM189-UBE2V1	1010.51	3.96583	0.127605	31.0789	4.63846e-212	1.98882e-210	UP
PTCH2	786.34	-4.35167	0.140024	-31.0781	4.76443e-212	2.04022e-210	DOWN
ST6GAL1	8916.55	3.37416	0.108662	31.052	1.0731e-211	4.5776e-210	UP
NUSAP1	2198.96	2.92665	0.0943808	31.009	4.08144e-211	1.73661e-209	UP
WNT7B	470.602	6.69432	0.216061	30.9834	9.0177e-211	3.8175e-209	UP
LRRC70	69.9604	-3.0827	0.0995454	-30.9678	1.46291e-210	6.18514e-209	DOWN
FOXI3	212.377	9.29191	0.300171	30.9554	2.14774e-210	9.0691e-209	UP
AC012123.1	172.203	7.26946	0.234839	30.955	2.17531e-210	9.17393e-209	UP
FAM72D	172.381	3.92593	0.126903	30.9366	3.84908e-210	1.62123e-208	UP
RP11-615I2.2	266.94	-4.21794	0.136435	-30.9153	7.43132e-210	3.11435e-208	DOWN
IL1RN	712.606	4.12024	0.133299	30.9097	8.8436e-210	3.70157e-208	UP
OIP5	221.835	3.13311	0.101372	30.907	9.63216e-210	4.02658e-208	UP
BBOX1	605.439	6.80664	0.220258	30.903	1.089e-209	4.54673e-208	UP
COL16A1	6476.4	-4.23557	0.137069	-30.9009	1.16124e-209	4.84227e-208	DOWN
CPED1	1022.17	-4.17566	0.135134	-30.9002	1.18794e-209	4.94742e-208	DOWN
LEMD1	762.376	5.81675	0.188415	30.8721	2.83295e-209	1.17837e-207	UP
SNX29P2	124.073	-3.93434	0.127495	-30.8588	4.26772e-209	1.77296e-207	DOWN
RP5-1120P11.1	112.386	5.26896	0.170752	30.8573	4.46586e-209	1.85297e-207	UP
RAP1GAP	2272.31	3.80361	0.123339	30.8386	7.97141e-209	3.29929e-207	UP
HOXB4	1069.4	5.20735	0.168931	30.8254	1.19754e-208	4.95037e-207	UP
MPZL3	378.417	2.78804	0.0904493	30.8244	1.23604e-208	5.10319e-207	UP
FBXO16	295.373	3.47618	0.11281	30.8146	1.67282e-208	6.89803e-207	UP
GALNT14	575.756	5.27783	0.171322	30.8065	2.14318e-208	8.82668e-207	UP
SYTL1	1148.62	3.56002	0.115586	30.7997	2.64097e-208	1.08634e-206	UP
ZNF83	3606.08	-2.66461	0.0865351	-30.7922	3.33152e-208	1.36871e-206	DOWN
CENPE	346.177	3.14014	0.101983	30.7907	3.49476e-208	1.43401e-206	UP
DNAAF3	399.629	4.89432	0.159049	30.7724	6.12889e-208	2.50871e-206	UP
PLK4	485.831	2.75494	0.0895463	30.7655	7.57648e-208	3.09745e-206	UP
BMP7	3991.14	6.71346	0.21828	30.7562	1.01066e-207	4.12678e-206	UP
RP11-97O12.6	115.408	-3.4083	0.110867	-30.7421	1.55707e-207	6.35013e-206	DOWN
PADI2	864.029	5.09041	0.165611	30.7371	1.81921e-207	7.41016e-206	UP
SLC9A2	271.193	7.24297	0.23571	30.7282	2.3892e-207	9.72005e-206	UP
ABCA5	654.333	-2.92519	0.095205	-30.7252	2.62384e-207	1.06617e-205	DOWN
CKMT1A	591.253	6.07751	0.197939	30.7039	5.04755e-207	2.04852e-205	UP
HIST1H4C	146.554	6.4691	0.210916	30.6714	1.36974e-206	5.55225e-205	UP
SHCBP1	316.832	3.1396	0.102431	30.6508	2.57983e-206	1.04195e-204	UP
DPY19L2	455.749	-4.41669	0.144293	-30.6091	9.2707e-206	3.73523e-204	DOWN
RMRP	2964.75	7.35918	0.240441	30.6071	9.85483e-206	3.9658e-204	UP
PSD3	1336.69	-3.30484	0.107998	-30.6009	1.19215e-205	4.79169e-204	DOWN
INHA	1023.27	-5.0814	0.166078	-30.5965	1.36245e-205	5.46959e-204	DOWN
NFATC4	4778.83	-3.14543	0.102811	-30.5943	1.45642e-205	5.83983e-204	DOWN
POU2F3	910.831	5.89028	0.192534	30.5934	1.49774e-205	5.99833e-204	UP
ST13P15	18.674	-2.80768	0.0917844	-30.59	1.66407e-205	6.65648e-204	DOWN
CTA-363E19.2	25.2998	-3.38942	0.110802	-30.5897	1.67668e-205	6.69892e-204	DOWN
AP000251.3	113.394	7.56535	0.247425	30.5764	2.52358e-205	1.00465e-203	UP
SPDEF	1058.91	6.79709	0.222485	30.5508	5.50991e-205	2.18831e-203	UP
RAB42	210.454	3.21849	0.105352	30.55	5.6558e-205	2.24358e-203	UP
KLHL35	427.53	4.58405	0.150172	30.5253	1.20265e-204	4.75945e-203	UP
GGH	1450.95	3.55946	0.116703	30.5003	2.58151e-204	1.01921e-202	UP
IFI30	7119.11	3.86346	0.126684	30.4969	2.86494e-204	1.12978e-202	UP
LEMD1-AS1	270.646	-5.0501	0.165696	-30.4781	5.07966e-204	1.99842e-202	DOWN
FBXL16	724.822	4.45794	0.146273	30.4769	5.27822e-204	2.07409e-202	UP
CTC-428H11.2	31.1773	-3.68202	0.120831	-30.4725	6.02808e-204	2.36597e-202	DOWN
FAM72B	232.742	3.40403	0.111713	30.4711	6.29906e-204	2.46653e-202	UP
CDR2L	4426.07	3.91389	0.12853	30.4511	1.15762e-203	4.5276e-202	UP
ACADL	246.175	-6.35828	0.20881	-30.4501	1.19526e-203	4.66936e-202	DOWN
PRKCZ	1322.67	2.50759	0.082391	30.4353	1.87448e-203	7.3142e-202	UP
AGPAT9	321.473	-3.98577	0.13098	-30.4303	2.18316e-203	8.50871e-202	DOWN
RP11-465B22.8	170.138	5.78108	0.190127	30.4064	4.5208e-203	1.75785e-201	UP
ISG15	7130.95	4.99411	0.164288	30.3984	5.7617e-203	2.23775e-201	UP
ZMAT1	871.205	-4.09849	0.134859	-30.391	7.22943e-203	2.80453e-201	DOWN
UBXN8	827.97	-2.83078	0.0931465	-30.3907	7.29749e-203	2.82765e-201	DOWN
KIF24	584.667	2.8018	0.0921971	30.3892	7.6285e-203	2.95248e-201	UP
RPL41P2	126.817	-3.75914	0.123734	-30.381	9.80273e-203	3.78959e-201	DOWN
NCEH1	1305.2	3.14793	0.103651	30.3706	1.34349e-202	5.18772e-201	UP
NEAT1_2	3.50047	-5.9388	0.19561	-30.3604	1.83349e-202	7.07163e-201	DOWN
FAM83A	974.754	6.75656	0.222594	30.3538	2.24158e-202	8.6257e-201	UP
FCHO1	1829.84	3.53608	0.116503	30.3517	2.38268e-202	9.15811e-201	UP
AOC1	1431.48	8.75729	0.288561	30.3482	2.65655e-202	1.0199e-200	UP
CTB-12A17.2	13.3911	-5.65975	0.186516	-30.3447	2.95425e-202	1.13289e-200	DOWN
AC137932.4	85.2125	-3.43442	0.113207	-30.3374	3.68395e-202	1.4111e-200	DOWN
RP11-250B2.5	62.4579	-3.90105	0.128598	-30.3352	3.93275e-202	1.50467e-200	DOWN
RP4-800G7.2	442.074	-3.19559	0.105366	-30.3285	4.83183e-202	1.84654e-200	DOWN
LINC00115	94.6982	-2.99199	0.0986663	-30.3244	5.47312e-202	2.08923e-200	DOWN
CXCL11	616.088	7.09563	0.234098	30.3105	8.33247e-202	3.17709e-200	UP
MYO3B	280.605	6.76336	0.223341	30.2827	1.93744e-201	7.35369e-200	UP
NRK	1328.53	-5.45154	0.180177	-30.2566	4.27837e-201	1.6202e-199	DOWN
GRAMD2	656.702	4.96249	0.164029	30.2538	4.65415e-201	1.76051e-199	UP
H3F3AP4	5081.27	2.58802	0.0856204	30.2266	1.058e-200	3.99754e-199	UP
TRIM59	809.103	2.78083	0.0920062	30.2244	1.13255e-200	4.27439e-199	UP
FRMPD1	190.986	6.06079	0.200528	30.2241	1.14366e-200	4.31145e-199	UP
RAC1P2	347.346	3.21422	0.10635	30.2231	1.17896e-200	4.43951e-199	UP
UBD	960.359	7.55298	0.249916	30.222	1.21586e-200	4.57329e-199	UP
NPIPA1	3997.58	-2.65529	0.0879097	-30.2048	2.04922e-200	7.69922e-199	DOWN
CXCL10	2532.39	6.34693	0.210225	30.1912	3.09413e-200	1.1612e-198	UP
DAPL1	3352.11	7.16025	0.23726	30.1789	4.48518e-200	1.68136e-198	UP
GOLT1A	147.425	5.59061	0.185385	30.1567	8.76072e-200	3.27678e-198	UP
KRT86	183.039	6.33524	0.210131	30.1489	1.10796e-199	4.13949e-198	UP
GPR19	112.139	5.26471	0.174657	30.1431	1.32075e-199	4.92898e-198	UP
LINC00284	515.129	6.86462	0.227754	30.1406	1.42642e-199	5.31741e-198	UP
2025-09-03	341.458	4.24668	0.14109	30.0991	4.97298e-199	1.84764e-197	UP
RP11-87H9.4	360.333	-2.85468	0.0948485	-30.0973	5.25806e-199	1.95138e-197	DOWN
SOWAHB	136.684	5.29758	0.176097	30.0833	8.00963e-199	2.96596e-197	UP
RAB3IP	1373.11	2.86112	0.0951147	30.0807	8.6656e-199	3.20531e-197	UP
F3	2471.8	-4.31986	0.14361	-30.0804	8.73434e-199	3.22716e-197	DOWN
LIX1	972.806	10.2746	0.341582	30.0795	8.99154e-199	3.31852e-197	UP
LA16c-380H5.5	166.011	7.01021	0.233081	30.0763	9.8991e-199	3.64945e-197	UP
RP11-325K4.2	38.5294	-3.69456	0.122864	-30.0703	1.18611e-198	4.36793e-197	DOWN
CRB2	1292	5.34687	0.177816	30.0697	1.2051e-198	4.433e-197	UP
RP11-540B6.6	198.658	-2.75391	0.0916448	-30.0498	2.19733e-198	8.06517e-197	DOWN
PALM3	608.39	5.52876	0.184103	30.0308	3.88662e-198	1.42499e-196	UP
ACSM3	3739.62	-3.79634	0.126434	-30.0264	4.44463e-198	1.6278e-196	DOWN
CNFN	374.719	5.15837	0.171868	30.0135	6.53381e-198	2.3877e-196	UP
NFKBIE	895.277	2.71399	0.090444	30.0075	7.84092e-198	2.86223e-196	UP
GSTM2	5728.37	-3.45898	0.115277	-30.0058	8.24607e-198	3.00685e-196	DOWN
RHOF	2583.8	3.81182	0.127057	30.001	9.52553e-198	3.4696e-196	UP
TRIM58	256.286	5.75341	0.191844	29.99	1.32614e-197	4.81985e-196	UP
KLK5	7075.7	7.77646	0.259469	29.9706	2.36858e-197	8.59925e-196	UP
IFI27	25020.5	4.90879	0.163787	29.9705	2.37966e-197	8.63009e-196	UP
RP11-354K4.2	10.4536	-7.82285	0.261065	-29.9651	2.79612e-197	1.01294e-195	DOWN
BRCC3P1	17.4787	-3.88837	0.129778	-29.9618	3.09104e-197	1.11857e-195	DOWN
TMEM30B	2073.49	3.03286	0.101263	29.9502	4.36715e-197	1.57865e-195	UP
MT-RNR1	144146	3.48982	0.11657	29.9376	6.38264e-197	2.30223e-195	UP
ANO9	1438.39	3.99649	0.133613	29.9109	1.41929e-196	5.11387e-195	UP
RP11-616M22.11	7.31057	-6.21165	0.207747	-29.9001	1.96105e-196	7.05072e-195	DOWN
ELMO3	1147.27	3.12163	0.104454	29.8851	3.06974e-196	1.10131e-194	UP
FA2H	149.786	5.28264	0.176984	29.8481	9.2877e-196	3.32852e-194	UP
DST	4355.42	-3.41622	0.114537	-29.8263	1.78435e-195	6.38107e-194	DOWN
PRSS53	174.096	-3.17051	0.106325	-29.8191	2.21136e-195	7.89119e-194	DOWN
AGMAT	134.468	4.39099	0.147266	29.8168	2.36849e-195	8.4429e-194	UP
KRT19	26317.6	3.34349	0.112139	29.8156	2.45169e-195	8.73015e-194	UP
CMTM6	9486.52	2.88471	0.0967977	29.8014	3.74848e-195	1.33336e-193	UP
PBX3	1482.51	-2.99146	0.100398	-29.796	4.39923e-195	1.56318e-193	DOWN
SLFN13	1476.88	2.94588	0.0989213	29.78	7.09418e-195	2.51542e-193	UP
F8A1	3257.99	2.94068	0.0987518	29.7785	7.42211e-195	2.62891e-193	UP
PI4KAP2	1376.29	-2.62625	0.0882613	-29.7553	1.47921e-194	5.2338e-193	DOWN
CLDN10	2123.39	6.54937	0.220156	29.7488	1.79527e-194	6.33866e-193	UP
PTH2R	521.785	8.13746	0.273622	29.7398	2.35009e-194	8.28886e-193	UP
ORC1	339.288	2.96068	0.0995761	29.7328	2.89131e-194	1.0187e-192	UP
FAM3B	537.196	6.04755	0.203424	29.7288	3.25507e-194	1.14566e-192	UP
GHc-857G6.7	32.4145	-3.42936	0.115364	-29.7264	3.49903e-194	1.23022e-192	DOWN
JAM3	1539.88	-3.30133	0.111154	-29.7005	7.57334e-194	2.65991e-192	DOWN
RP11-597D13.7	23.2827	-3.95733	0.133407	-29.6636	2.26344e-193	7.92466e-192	DOWN
NAV3	493.485	-4.04816	0.136512	-29.6542	2.99019e-193	1.04581e-191	DOWN
OVOL1	247.539	5.40094	0.182171	29.6476	3.6444e-193	1.27329e-191	UP
CORO6	201.067	-4.039	0.136242	-29.6457	3.85287e-193	1.34332e-191	DOWN
HOMER2	3446.95	3.17338	0.107137	29.6199	8.29489e-193	2.88301e-191	UP
LACTB2	1308.96	2.70927	0.0914817	29.6154	9.45266e-193	3.282e-191	UP
C15orf48	506.782	5.63219	0.190187	29.6139	9.88635e-193	3.42901e-191	UP
CEP290	826.4	-2.54163	0.0858323	-29.6116	1.06071e-192	3.67519e-191	DOWN
CTB-50L17.9	14.6717	-3.49762	0.11821	-29.5881	2.12331e-192	7.32653e-191	DOWN
DNAJB13	549.076	5.61164	0.189728	29.5773	2.9253e-192	1.00626e-190	UP
CTD-2036P10.6	15.1297	-3.73851	0.126403	-29.576	3.0408e-192	1.04492e-190	DOWN
BCYRN1	1745.49	4.88618	0.16522	29.5737	3.25302e-192	1.11669e-190	UP
GOLGA8B	4979.81	-3.81398	0.129144	-29.5329	1.08972e-191	3.7331e-190	DOWN
STAMBPL1	278.844	-2.83055	0.0958634	-29.5269	1.29905e-191	4.44567e-190	DOWN
AC245100.1	624.441	3.1759	0.107595	29.5172	1.73443e-191	5.92349e-190	UP
PRDM8	139.822	-3.84855	0.130424	-29.508	2.27436e-191	7.75955e-190	DOWN
AC093642.1	118.149	-5.99278	0.203092	-29.5076	2.29704e-191	7.82891e-190	DOWN
CTB-55O6.8	997.083	4.51904	0.153224	29.4931	3.52826e-191	1.19886e-189	UP
PRR19	180.857	3.05325	0.103537	29.4895	3.92413e-191	1.33201e-189	UP
P2RY6	434.213	4.48839	0.152222	29.4858	4.37648e-191	1.48405e-189	UP
ARHGAP39	2123.67	2.52526	0.0856674	29.4774	5.60723e-191	1.89946e-189	UP
RP11-736N17.4	198.227	5.93677	0.201453	29.4698	7.03034e-191	2.37673e-189	UP
CCNL2	7780.22	-2.55099	0.0865976	-29.458	9.9465e-191	3.35579e-189	DOWN
IKBKE	943.75	2.91774	0.0990654	29.4526	1.1655e-190	3.92824e-189	UP
CHD7	2568.77	2.87498	0.0976177	29.4514	1.2067e-190	4.06301e-189	UP
TFAP2A	1420.1	5.84882	0.198685	29.4377	1.80838e-190	6.08275e-189	UP
TSTA3	5926	2.70396	0.0918711	29.4321	2.13359e-190	7.16943e-189	UP
DNM1P47	38.5615	-5.52172	0.18763	-29.4287	2.35693e-190	7.91193e-189	DOWN
RP11-109J4.1	185.426	8.66912	0.294763	29.4105	4.03026e-190	1.34749e-188	UP
TRPM3	104.513	-4.92966	0.167654	-29.4038	4.91649e-190	1.64216e-188	DOWN
AC079779.4	8.89292	-5.53595	0.188319	-29.3967	6.06047e-190	2.02224e-188	DOWN
SEMA3F	4588.76	3.52232	0.120059	29.3383	3.36912e-189	1.12084e-187	UP
CLIC3	651.774	4.86501	0.165831	29.3371	3.49094e-189	1.16021e-187	UP
CITED4	5314.13	3.87171	0.132014	29.3281	4.54497e-189	1.50751e-187	UP
CXCL17	2892.31	8.10044	0.276266	29.3211	5.57964e-189	1.84886e-187	UP
RP11-388C12.8	67.6745	-4.08831	0.139451	-29.3172	6.26307e-189	2.07327e-187	DOWN
XDH	250.939	6.58158	0.224657	29.2961	1.16151e-188	3.84114e-187	UP
PITPNM1	3428.01	2.64991	0.0904731	29.2895	1.41211e-188	4.66065e-187	UP
APOBEC3B	644.925	4.78194	0.163311	29.2812	1.8024e-188	5.94292e-187	UP
VEPH1	280.787	4.48626	0.153293	29.2659	2.82194e-188	9.28628e-187	UP
CHST6	416.028	5.59654	0.191252	29.2626	3.10291e-188	1.02008e-186	UP
FANCA	815.108	2.66099	0.0909936	29.2437	5.3942e-188	1.7716e-186	UP
CROCCP3	316.75	-3.09176	0.105731	-29.2417	5.72907e-188	1.87973e-186	DOWN
GALNT15	654.586	-4.99363	0.170812	-29.2346	7.04168e-188	2.30814e-186	DOWN
SDC1	2944.52	4.34451	0.148699	29.2168	1.18656e-187	3.8817e-186	UP
CCDC36	72.1255	-3.7851	0.129563	-29.2144	1.27362e-187	4.16243e-186	DOWN
CST1	521.702	10.162	0.347988	29.2022	1.81699e-187	5.92668e-186	UP
RASSF10	709.48	6.45434	0.22105	29.1986	2.02232e-187	6.59e-186	UP
TNF	294.623	6.13408	0.210177	29.1853	2.98223e-187	9.69908e-186	UP
RP11-356I2.4	67.1144	-2.73433	0.0937176	-29.1763	3.87552e-187	1.25921e-185	DOWN
RP3-402G11.28	34.6918	-3.13902	0.107636	-29.1634	5.64806e-187	1.83334e-185	DOWN
JMJD7-PLA2G4B	1243.18	-3.23546	0.110967	-29.1569	6.83737e-187	2.21723e-185	DOWN
IGFBP4	24809.5	-3.30235	0.113336	-29.1378	1.19205e-186	3.85438e-185	DOWN
GOLGA8S	24.5029	-4.88841	0.167854	-29.123	1.83584e-186	5.91883e-185	DOWN
MAPK11	287.2	-2.97277	0.102092	-29.1186	2.08654e-186	6.72061e-185	DOWN
CHRD	706.965	-4.24809	0.145904	-29.1156	2.2779e-186	7.32989e-185	DOWN
RAB3D	3186.11	2.68608	0.0922804	29.1078	2.85709e-186	9.17594e-185	UP
S100A2	1351.53	5.78019	0.198774	29.0792	6.58325e-186	2.11024e-184	UP
ANTXR2	1753.97	-3.49064	0.120039	-29.0791	6.59914e-186	2.11331e-184	DOWN
DEFB1	1690.29	7.53505	0.259137	29.0774	6.92422e-186	2.21529e-184	UP
PI3	1929.12	7.31855	0.251695	29.0771	7.00159e-186	2.2379e-184	UP
MSL3P1	401.675	4.88201	0.167936	29.0707	8.41458e-186	2.68695e-184	UP
C2orf54	382.943	6.31331	0.217368	29.0444	1.81174e-185	5.77422e-184	UP
CD74	137753	4.0283	0.138695	29.0442	1.82201e-185	5.80143e-184	UP
TTC30A	1057.53	2.52252	0.0868517	29.0441	1.8293e-185	5.81908e-184	UP
RORA	780.466	-2.73418	0.0941557	-29.0389	2.12329e-185	6.74786e-184	DOWN
STAR	10024.8	-7.91821	0.272793	-29.0265	3.04975e-185	9.68296e-184	DOWN
ACBD7	115.162	4.61255	0.158956	29.0178	3.92486e-185	1.24496e-183	UP
ZNF10	718.702	-2.67268	0.0921769	-28.9951	7.59457e-185	2.4067e-183	DOWN
CGN	3126.54	2.84504	0.0981584	28.9841	1.04295e-184	3.30195e-183	UP
C12orf56	170.271	5.03525	0.173754	28.9792	1.20498e-184	3.81133e-183	UP
LMOD1	2007.91	-4.24584	0.146554	-28.9712	1.51952e-184	4.80164e-183	DOWN
RP4-669P10.20	22.8557	-3.44847	0.119051	-28.9664	1.74658e-184	5.51394e-183	DOWN
PPP1R14C	457.407	5.07955	0.175388	28.9618	1.99105e-184	6.2798e-183	UP
RP11-454E5.4	51.8055	-2.68939	0.0928706	-28.9585	2.19431e-184	6.90784e-183	DOWN
GPT2	2167.74	2.86325	0.0988963	28.9521	2.64437e-184	8.30899e-183	UP
TRAF1	736.479	-2.60145	0.0898729	-28.9458	3.16655e-184	9.94041e-183	DOWN
NPW	771.478	5.90377	0.203997	28.9405	3.7001e-184	1.16044e-182	UP
LYN	1795.51	2.65297	0.0917058	28.9292	5.13115e-184	1.60774e-182	UP
AC025165.8	118.97	-4.47549	0.154749	-28.921	6.50676e-184	2.03685e-182	DOWN
CAPN3	306.221	-3.35736	0.116116	-28.9139	7.99026e-184	2.4989e-182	DOWN
TSPAN5	1023.07	-3.46287	0.119834	-28.8972	1.29541e-183	4.04373e-182	DOWN
RP11-446H18.1	37.9937	-4.92531	0.170469	-28.8927	1.47491e-183	4.59548e-182	DOWN
MEF2C-AS1	28.3979	-4.52614	0.156658	-28.8919	1.50913e-183	4.69772e-182	DOWN
CLGN	995.458	5.2183	0.180695	28.8791	2.18447e-183	6.78732e-182	UP
RP11-681H18.2	282.913	-2.58108	0.0893824	-28.8768	2.33503e-183	7.24834e-182	DOWN
RASEF	585.145	3.66662	0.127003	28.8704	2.81236e-183	8.72197e-182	UP
TSHZ3	1334.09	-3.76285	0.130446	-28.846	5.6826e-183	1.75908e-181	DOWN
E2F1	1606.43	2.66195	0.0922914	28.8428	6.23237e-183	1.92747e-181	UP
CYP2J2	224.351	4.60772	0.159761	28.8413	6.51447e-183	2.01286e-181	UP
USP18	1768.74	3.45695	0.119928	28.8252	1.03809e-182	3.20456e-181	UP
PCDH1	3922.9	3.43282	0.119093	28.8248	1.04863e-182	3.2341e-181	UP
CFB	24919.8	4.51074	0.156505	28.8216	1.1501e-182	3.54378e-181	UP
PDGFRA	6445	-4.65086	0.161488	-28.8	2.14287e-182	6.5906e-181	DOWN
RP11-465N4.4	184.691	3.67313	0.12757	28.7931	2.61851e-182	8.04606e-181	UP
HS3ST1	1123.83	-3.48255	0.12097	-28.7885	2.99116e-182	9.1827e-181	DOWN
ADAMTS1	17784.5	-3.98671	0.138534	-28.7778	4.06309e-182	1.24392e-180	DOWN
ALPL	5373.91	4.82895	0.167919	28.7576	7.27863e-182	2.22224e-180	UP
RP11-578F21.6	2.68723	-4.8639	0.169188	-28.7485	9.46836e-182	2.88815e-180	DOWN
LPAR3	2981.46	4.58976	0.159782	28.7251	1.85455e-181	5.65181e-180	UP
SNX10	713.573	3.49051	0.121593	28.7066	3.15385e-181	9.60271e-180	UP
SLC9A3R1	4805.25	2.96052	0.103194	28.6889	5.24707e-181	1.59325e-179	UP
FUT1	290.848	2.80584	0.0978274	28.6816	6.48046e-181	1.96598e-179	UP
VDR	920.243	3.63826	0.126864	28.6785	7.08497e-181	2.14741e-179	UP
RP11-446H18.5	9.69824	-3.47228	0.12111	-28.6705	8.90418e-181	2.69392e-179	DOWN
RP11-522B15.3	174.461	-4.1968	0.146391	-28.6685	9.43116e-181	2.84819e-179	DOWN
DENND1C	526.763	2.69974	0.0941972	28.6605	1.18679e-180	3.58086e-179	UP
NXPH3	212.009	-3.49785	0.122107	-28.6458	1.80759e-180	5.44412e-179	DOWN
SLC2A1	14819.1	3.38412	0.118144	28.6441	1.90006e-180	5.71747e-179	UP
RP11-228B15.4	450.535	-3.8389	0.134067	-28.6342	2.52534e-180	7.59214e-179	DOWN
PHOX2A	638.763	10.0278	0.350232	28.6318	2.70303e-180	8.11906e-179	UP
MTUS1	2322.77	-2.51448	0.087865	-28.6175	4.06919e-180	1.21897e-178	DOWN
RP11-553L6.5	787.676	-2.85082	0.0996507	-28.6082	5.31613e-180	1.59108e-178	DOWN
C9orf72	1190.17	-2.5185	0.088053	-28.6021	6.32986e-180	1.89278e-178	DOWN
CNRIP1	627.225	-3.22383	0.112728	-28.5984	7.036e-180	2.10205e-178	DOWN
NDUFS8	9356.3	2.59381	0.0907035	28.5966	7.40162e-180	2.20733e-178	UP
CRIP1	10717.8	4.59092	0.160562	28.5928	8.26093e-180	2.4614e-178	UP
KLHDC7B	219.766	5.9521	0.208332	28.5702	1.57712e-179	4.69496e-178	UP
ANKRD36	594.795	-2.81394	0.0984997	-28.568	1.67797e-179	4.9863e-178	DOWN
LINC00899	355.845	-3.17362	0.111128	-28.5582	2.22148e-179	6.58967e-178	DOWN
GAL3ST2	200.491	5.56419	0.194886	28.551	2.73078e-179	8.09324e-178	UP
WISP2	1358.06	-5.58148	0.19572	-28.5177	7.07033e-179	2.09173e-177	DOWN
IFI6	39466.7	4.90871	0.172192	28.5071	9.5593e-179	2.82308e-177	UP
AC005083.1	142.812	6.2502	0.219333	28.4963	1.30025e-178	3.83654e-177	UP
ADORA1	404.877	4.31057	0.151354	28.48	2.07336e-178	6.09079e-177	UP
C1orf233	1774.48	4.05694	0.142471	28.4756	2.35203e-178	6.90335e-177	UP
RPS4Y1	2.75908	-6.54304	0.229901	-28.4602	3.64029e-178	1.06657e-176	DOWN
LINC00891	139.264	-4.21386	0.148096	-28.4535	4.40877e-178	1.2906e-176	DOWN
TDO2	326.946	6.02243	0.211663	28.4529	4.48963e-178	1.31312e-176	UP
TNS2	6831.12	-2.71496	0.0954584	-28.4413	6.25011e-178	1.82642e-176	DOWN
NUPR1L	267.731	7.30705	0.256957	28.4368	7.09298e-178	2.07091e-176	UP
BHLHE41	11221.8	3.88199	0.136518	28.4358	7.31041e-178	2.13253e-176	UP
C2CD4D	73.9446	4.66697	0.164133	28.434	7.67723e-178	2.23759e-176	UP
DUSP26	200.376	-5.61837	0.197627	-28.4291	8.83251e-178	2.57206e-176	DOWN
LINC00665	4494.54	2.51524	0.0884864	28.4252	9.87822e-178	2.87406e-176	UP
KLRG2	246.635	6.89971	0.24281	28.4161	1.27873e-177	3.71399e-176	UP
OAS2	4806.89	4.41478	0.155401	28.4089	1.56997e-177	4.5559e-176	UP
CTD-2044J15.1	16.1375	-4.2925	0.151116	-28.4053	1.73709e-177	5.03651e-176	DOWN
NOSTRIN	234.997	-2.68035	0.0943828	-28.3987	2.09914e-177	6.08096e-176	DOWN
ATP2B2	539.267	5.24587	0.184748	28.3948	2.34303e-177	6.77571e-176	UP
TONSL	2139.82	2.51649	0.0886411	28.3897	2.71039e-177	7.82451e-176	UP
H2AFX	5347.01	2.53753	0.0893865	28.3883	2.81708e-177	8.1255e-176	UP
RBM38	9903.92	2.54186	0.0895608	28.3815	3.42613e-177	9.8737e-176	UP
SCGB1D2	1027.81	6.81337	0.240093	28.378	3.78246e-177	1.08912e-175	UP
RP11-651P23.4	272.752	2.62908	0.0926468	28.3774	3.84351e-177	1.10574e-175	UP
ADGRF1	313.825	6.67003	0.235083	28.3731	4.34467e-177	1.24885e-175	UP
HES2	224.347	6.03107	0.212757	28.3473	9.04127e-177	2.59662e-175	UP
VLDLR-AS1	209.264	-4.01702	0.141758	-28.3371	1.20586e-176	3.46022e-175	DOWN
UNC5A	1242.28	6.18165	0.218288	28.3188	2.02722e-176	5.80713e-175	UP
RP11-616M22.12	11.2269	-6.60836	0.233377	-28.3163	2.17864e-176	6.23555e-175	DOWN
RP11-632K20.7	174.147	-2.82972	0.100003	-28.2963	3.83574e-176	1.09596e-174	DOWN
PTPN3	1064.11	2.87575	0.101678	28.283	5.59543e-176	1.59601e-174	UP
SIGLEC11	1067.84	-5.73076	0.202704	-28.2716	7.72121e-176	2.19673e-174	DOWN
RASL11B	983.191	-4.33472	0.15336	-28.265	9.29866e-176	2.64102e-174	DOWN
CTD-2536I1.2	53.3415	-5.40903	0.191414	-28.2583	1.12653e-175	3.19417e-174	DOWN
KDELR3	1462.09	3.29962	0.116767	28.2582	1.12799e-175	3.19558e-174	UP
LRRN2	3816.23	3.81257	0.134988	28.2437	1.70083e-175	4.81435e-174	UP
GINS4	436.536	2.75549	0.0976078	28.2302	2.49057e-175	7.03785e-174	UP
NFIL3	1970.09	-2.59793	0.0920704	-28.2168	3.63873e-175	1.0265e-173	DOWN
EXPH5	516.487	2.87005	0.101744	28.2086	4.59086e-175	1.294e-173	UP
NHLRC1	157.017	3.3276	0.11799	28.2024	5.47081e-175	1.54073e-173	UP
ADAMTS9-AS1	360.706	-5.04066	0.178742	-28.2008	5.72099e-175	1.60983e-173	DOWN
SLC22A3	482.781	-5.75594	0.204183	-28.1901	7.73263e-175	2.17405e-173	DOWN
CDCA7	864.908	3.8071	0.135081	28.1838	9.23778e-175	2.59505e-173	UP
FGF2	402.807	-4.02461	0.142816	-28.1804	1.01667e-174	2.8536e-173	DOWN
RP11-693N9.2	151.637	-3.48097	0.123623	-28.1581	1.90906e-174	5.3449e-173	DOWN
C4orf19	227.181	4.66088	0.165534	28.1566	1.9883e-174	5.56207e-173	UP
SPINT2	29981.4	2.95598	0.105003	28.1512	2.31608e-174	6.46277e-173	UP
KLC3	290.466	4.75386	0.16894	28.1394	3.23125e-174	9.00142e-173	UP
ST6GALNAC2	2204.59	3.9696	0.141079	28.1375	3.4099e-174	9.49118e-173	UP
RP11-613D13.8	94.7122	-6.47559	0.230183	-28.1323	3.94229e-174	1.09548e-172	DOWN
RP11-250B2.3	33.1528	-3.37578	0.120119	-28.1037	8.83644e-174	2.44326e-172	DOWN
MPPED2	875.638	4.54966	0.161925	28.0973	1.05561e-173	2.91634e-172	UP
MIR4435-2HG	881.33	3.25895	0.116004	28.0935	1.17557e-173	3.24505e-172	UP
FAM156A	991.534	-2.53342	0.0901987	-28.0871	1.40907e-173	3.88318e-172	DOWN
DLG2	161.676	-3.77493	0.134413	-28.0847	1.50793e-173	4.15222e-172	DOWN
HRASLS	141.891	4.21649	0.150161	28.0798	1.72813e-173	4.75464e-172	UP
ICA1	865.083	2.87826	0.102569	28.0616	2.88186e-173	7.92239e-172	UP
WDR27	827.697	-2.58886	0.0922946	-28.0499	4.00235e-173	1.09846e-171	DOWN
ANKRD23	150.453	-2.54563	0.0907815	-28.0412	5.10861e-173	1.39978e-171	DOWN
NCK1-AS1	242.81	2.73243	0.0974501	28.0393	5.39988e-173	1.47837e-171	UP
RAPGEF4	249.391	-2.56418	0.0914835	-28.0289	7.22566e-173	1.97661e-171	DOWN
RP1-253P7.4	50.4377	-3.34805	0.119474	-28.0232	8.4849e-173	2.31918e-171	DOWN
ZCCHC18	120.388	-3.962	0.141397	-28.0204	9.17965e-173	2.50703e-171	DOWN
KLF15	969.917	-3.6262	0.129441	-28.0144	1.08457e-172	2.95719e-171	DOWN
MEG9	249.708	-6.00277	0.214296	-28.0115	1.17662e-172	3.20557e-171	DOWN
TRPC4	56.5626	-4.21302	0.150527	-27.9884	2.25009e-172	6.11516e-171	DOWN
RP11-9E17.1	560.775	3.79285	0.135535	27.9844	2.51871e-172	6.83962e-171	UP
HSD11B1	471.615	-4.3729	0.156412	-27.9577	5.31901e-172	1.43971e-170	DOWN
BCL2L14	106.039	5.81655	0.208129	27.9468	7.20573e-172	1.94881e-170	UP
ZNF483	77.7355	-3.10396	0.11108	-27.9436	7.88623e-172	2.13113e-170	DOWN
SH2B2	706.526	2.68511	0.0960915	27.9432	7.96638e-172	2.15105e-170	UP
RP11-43N16.4	127.417	-2.73905	0.0980281	-27.9415	8.35681e-172	2.25465e-170	DOWN
RP4-797C5.2	131.845	8.14424	0.291706	27.9194	1.55255e-171	4.17526e-170	UP
CTD-2104P17.1	10.3246	-5.70544	0.204368	-27.9176	1.6333e-171	4.38889e-170	DOWN
ARPC1B	8936.61	2.64799	0.0948525	27.9169	1.66381e-171	4.46728e-170	UP
ESR2	164.24	-3.90515	0.139895	-27.9149	1.76154e-171	4.72588e-170	DOWN
CCBE1	654.326	-5.3803	0.192749	-27.9135	1.82751e-171	4.89894e-170	DOWN
MAPK12	541.625	-3.11761	0.111728	-27.9036	2.41414e-171	6.45594e-170	DOWN
WHAMMP2	151.267	-3.87659	0.13895	-27.8992	2.72475e-171	7.27492e-170	DOWN
UBAP1L	430.829	-3.21137	0.115141	-27.8907	3.46125e-171	9.2266e-170	DOWN
LINC01197	183.344	-4.18993	0.150249	-27.8866	3.88269e-171	1.03335e-169	DOWN
DBNDD1	1712.26	3.04522	0.109245	27.8751	5.34046e-171	1.4202e-169	UP
RAB9B	180.85	-3.84337	0.137896	-27.8715	5.91804e-171	1.57254e-169	DOWN
RP11-793H13.10	131.13	-3.06485	0.11001	-27.8598	8.19903e-171	2.17691e-169	DOWN
H1FNT	6.78847	-4.75913	0.170829	-27.859	8.39174e-171	2.22631e-169	DOWN
COX5A	6224.15	2.67409	0.096086	27.8302	1.87093e-170	4.95959e-169	UP
MIF	41894.7	2.92242	0.105027	27.8253	2.14159e-170	5.67257e-169	UP
PHYHIP	167.141	-4.35976	0.156692	-27.8237	2.24088e-170	5.93088e-169	DOWN
ARHGAP6	523.454	-3.91603	0.140782	-27.8163	2.75255e-170	7.27357e-169	DOWN
RPPH1	1897.86	6.1348	0.22063	27.8058	3.69178e-170	9.74775e-169	UP
AC092641.2	2.73918	-4.19709	0.150982	-27.7986	4.5144e-170	1.18916e-168	DOWN
AHSA2	3852.02	-2.6069	0.0937807	-27.7979	4.60501e-170	1.21207e-168	DOWN
ANG	482.264	-3.1328	0.112752	-27.7848	6.61424e-170	1.73955e-168	DOWN
RP11-98D18.9	67.5481	4.07922	0.146959	27.7576	1.41056e-169	3.69813e-168	UP
COX5B	13379.3	2.56118	0.0922807	27.7542	1.54997e-169	4.06043e-168	UP
LENG8	15510	-2.81966	0.101709	-27.7228	3.70947e-169	9.71004e-168	DOWN
RBM5-AS1	48.0093	-3.41512	0.123211	-27.7177	4.27421e-169	1.11796e-167	DOWN
CXCR4	4830.71	3.41289	0.123161	27.7108	5.17203e-169	1.35173e-167	UP
GNRH1	92.4051	-3.4866	0.125821	-27.7108	5.17716e-169	1.35201e-167	DOWN
RP11-395N3.1	6.22236	-5.05742	0.18266	-27.6876	9.8546e-169	2.5695e-167	DOWN
GNA14	115.773	-3.34081	0.120736	-27.6703	1.59243e-168	4.14565e-167	DOWN
U47924.27	133.22	6.67991	0.241673	27.6403	3.65085e-168	9.48226e-167	UP
CLSTN2	4431.72	-4.70549	0.170273	-27.635	4.22379e-168	1.09533e-166	DOWN
RP11-212I21.4	40.6553	-3.32798	0.120451	-27.6293	4.94559e-168	1.28052e-166	DOWN
C11orf52	428.421	3.27672	0.118606	27.6268	5.29931e-168	1.37105e-166	UP
SLC9A4	195.188	6.17488	0.223549	27.6221	6.04213e-168	1.56202e-166	UP
RP5-855D21.3	43.1194	-3.10229	0.112333	-27.6169	6.97514e-168	1.80183e-166	DOWN
PEG3	7312.83	-5.94725	0.215399	-27.6104	8.34197e-168	2.15158e-166	DOWN
ERCC6L	254.155	2.80402	0.101598	27.5993	1.13522e-167	2.92574e-166	UP
SMG1P7	140.951	-3.01574	0.109319	-27.5867	1.60874e-167	4.14292e-166	DOWN
RP11-759A24.2	3.50331	-5.73771	0.20803	-27.5811	1.87418e-167	4.82278e-166	DOWN
GINS2	554.074	2.91391	0.105676	27.574	2.28367e-167	5.86746e-166	UP
GLOD5	77.494	7.409	0.268722	27.5712	2.4657e-167	6.33027e-166	UP
NDUFB9	13132.2	2.91006	0.105556	27.5689	2.62854e-167	6.74315e-166	UP
RNASEH2A	1909.54	2.66396	0.0967027	27.5479	4.68887e-167	1.20102e-165	UP
FAM189A2	763.484	-3.99508	0.145024	-27.5477	4.71382e-167	1.20648e-165	DOWN
ITM2A	1292.88	-3.94625	0.143298	-27.5388	6.02689e-167	1.54138e-165	DOWN
ANKRD29	279.151	-3.88066	0.140927	-27.5367	6.3921e-167	1.63353e-165	DOWN
ST3GAL4	1926.52	-2.5023	0.0909025	-27.5273	8.27745e-167	2.11373e-165	DOWN
CTA-268H5.14	14.4539	-4.8119	0.17482	-27.5248	8.85743e-167	2.2601e-165	DOWN
SERPINA10	19.3372	-6.41957	0.233319	-27.5141	1.18938e-166	3.03024e-165	DOWN
OLR1	395.683	4.88704	0.177693	27.5026	1.63338e-166	4.14879e-165	UP
MT1G	3072.96	6.64164	0.241555	27.4953	1.99561e-166	5.06116e-165	UP
DIRAS2	201.058	5.53685	0.201376	27.4951	2.00768e-166	5.08789e-165	UP
IDO1	1062.83	5.89322	0.214657	27.4542	6.19767e-166	1.56469e-164	UP
SEC31B	613.809	-3.43567	0.12516	-27.4503	6.89774e-166	1.74012e-164	DOWN
RTP4	960.37	3.72263	0.135687	27.4355	1.03402e-165	2.60659e-164	UP
MPP7	1862.04	2.55104	0.0930395	27.4189	1.63262e-165	4.10626e-164	UP
RASGRF2	723.709	-3.54817	0.129437	-27.4123	1.9571e-165	4.91866e-164	DOWN
UBE2S	3898.77	2.76517	0.100909	27.4026	2.5552e-165	6.41701e-164	UP
TNFAIP8L3	242.715	-3.60401	0.131525	-27.4017	2.61799e-165	6.56976e-164	DOWN
FNDC4	685.936	-3.08209	0.112551	-27.3839	4.26351e-165	1.06831e-163	DOWN
RP11-755F10.3	28.0899	-3.81724	0.139399	-27.3835	4.31321e-165	1.07995e-163	DOWN
FTCDNL1	247.027	3.02678	0.110552	27.3787	4.91837e-165	1.23055e-163	UP
URAHP	136.754	-2.7062	0.0988791	-27.3688	6.4602e-165	1.61389e-163	DOWN
CACNA1B	402.293	5.21119	0.190417	27.3673	6.73164e-165	1.68044e-163	UP
ADGRG2	1774.16	5.69857	0.20844	27.3391	1.45365e-164	3.62337e-163	UP
OBSL1	13237.3	-2.53877	0.0928951	-27.3294	1.89721e-164	4.72195e-163	DOWN
PKIB	188.271	4.0163	0.146968	27.3278	1.98483e-164	4.93636e-163	UP
KCNS1	219.046	6.18626	0.226375	27.3275	1.99782e-164	4.96497e-163	UP
LY6E	57424.9	3.33201	0.121953	27.322	2.32087e-164	5.76351e-163	UP
COL23A1	725.253	4.99856	0.183062	27.3053	3.67058e-164	9.09503e-163	UP
HLA-DRA	33248.7	4.0857	0.149634	27.3046	3.74501e-164	9.27258e-163	UP
RP5-1024G6.5	115.578	3.11063	0.113944	27.2997	4.27408e-164	1.05747e-162	UP
GOLGA8A	6819.25	-3.71734	0.136296	-27.274	8.63532e-164	2.13177e-162	DOWN
RP11-867G23.1	21.8911	-4.8179	0.176725	-27.2621	1.19385e-163	2.94286e-162	DOWN
IL1RAP	2216	2.99553	0.109915	27.2531	1.52686e-163	3.76096e-162	UP
NPTN-IT1	60.9791	-2.97845	0.109497	-27.2013	6.27091e-163	1.53785e-161	DOWN
PRCD	55.865	-3.27087	0.120279	-27.194	7.65261e-163	1.87531e-161	DOWN
LINC01554	13.2627	-4.81173	0.176988	-27.1868	9.31324e-163	2.28058e-161	DOWN
HCAR1	530.674	4.66946	0.171796	27.1803	1.10977e-162	2.71358e-161	UP
CTC-260E6.4	251.51	4.13452	0.152251	27.1559	2.15515e-162	5.25431e-161	UP
RP11-774O3.3	419.179	-2.86572	0.105532	-27.1549	2.2182e-162	5.4041e-161	DOWN
TGFA	469.498	4.48467	0.165249	27.1389	3.42151e-162	8.31746e-161	UP
MIR3648-1	62.392	7.3274	0.270055	27.133	4.02223e-162	9.76357e-161	UP
MIR3648-2	62.392	7.3274	0.270055	27.133	4.02223e-162	9.76357e-161	UP
GJB2	960.583	5.53155	0.203925	27.1254	4.93491e-162	1.19703e-160	UP
TEAD4	1241.65	2.76109	0.101822	27.1168	6.23833e-162	1.51209e-160	UP
SLC5A1	712.839	6.58055	0.242763	27.1069	8.1678e-162	1.9769e-160	UP
SLC28A3	441.326	4.99644	0.184345	27.1037	8.91529e-162	2.15314e-160	UP
ZSWIM4	2807.81	2.79669	0.103201	27.0994	1.00037e-161	2.41251e-160	UP
OR5K2	2.77129	-4.88231	0.18017	-27.0983	1.03049e-161	2.48337e-160	DOWN
AP000473.8	70.8759	-4.47596	0.16518	-27.0974	1.05619e-161	2.54346e-160	DOWN
ELOVL7	424.844	3.46464	0.127951	27.0777	1.80154e-161	4.32589e-160	UP
LY75	1037.72	2.97111	0.109782	27.0637	2.63586e-161	6.31567e-160	UP
PYCR1	2804.21	2.98696	0.110393	27.0574	3.12774e-161	7.48349e-160	UP
CTD-2311M21.3	128.141	-5.70192	0.210804	-27.0484	3.98858e-161	9.52951e-160	DOWN
FAT2	1054.1	4.70603	0.174052	27.0381	5.27565e-161	1.25776e-159	UP
SUPT20HL1	4.37334	-6.24868	0.231313	-27.014	1.01189e-160	2.40899e-159	DOWN
RP11-182J1.14	24.7885	-4.68901	0.173679	-26.9982	1.55132e-160	3.6827e-159	DOWN
COX6B1	13624.9	2.62409	0.0971979	26.9974	1.58717e-160	3.76245e-159	UP
RP11-74M13.4	29.3609	-6.99281	0.25906	-26.993	1.78502e-160	4.22848e-159	DOWN
RORC	808.193	4.27108	0.158272	26.9857	2.17484e-160	5.14461e-159	UP
FOLR3	280.565	7.47817	0.277299	26.9679	3.51927e-160	8.31308e-159	UP
CCL26	53.5735	-4.76438	0.176801	-26.9477	6.06892e-160	1.43054e-158	DOWN
UPK3B	6852.2	5.21729	0.193716	26.9326	9.11172e-160	2.14475e-158	UP
ESM1	314.776	3.52574	0.130937	26.927	1.06187e-159	2.4977e-158	UP
FHDC1	687.622	2.8784	0.106919	26.9214	1.23479e-159	2.90037e-158	UP
RP11-400F19.18	32.9776	-3.48696	0.129543	-26.9174	1.37435e-159	3.22591e-158	DOWN
NAT8L	1758.83	3.90178	0.144996	26.9095	1.69822e-159	3.98051e-158	UP
RP11-256I23.1	11.4637	-5.03439	0.187099	-26.9076	1.78995e-159	4.19257e-158	DOWN
SNORA73A	885.582	8.86296	0.32947	26.9006	2.15893e-159	5.05329e-158	UP
UBXN10	843.058	3.55561	0.132177	26.9003	2.18143e-159	5.10238e-158	UP
GABARAPL1	2769.75	-2.71777	0.101057	-26.8935	2.61946e-159	6.12265e-158	DOWN
RP11-321P16.1	4.77445	-5.0228	0.186818	-26.886	3.19916e-159	7.46196e-158	DOWN
AC009237.8	333.82	3.05674	0.113759	26.8704	4.8698e-159	1.13508e-157	UP
BOLA3	965.527	2.52338	0.093926	26.8657	5.53486e-159	1.28829e-157	UP
RP11-608O21.1	41.8503	6.84899	0.254988	26.86	6.44526e-159	1.49811e-157	UP
HUNK	1119.16	3.5442	0.131953	26.8595	6.52562e-159	1.51573e-157	UP
CTC-250I14.3	134.742	5.96708	0.222193	26.8553	7.30959e-159	1.69547e-157	UP
RP11-73M18.6	14.051	-2.77141	0.103199	-26.855	7.38065e-159	1.71076e-157	DOWN
SPARCL1	7556.53	-2.96012	0.110259	-26.8471	9.12878e-159	2.11157e-157	DOWN
DSG2	7758.71	2.5682	0.0956696	26.8445	9.77737e-159	2.26003e-157	UP
EDN2	288.942	5.75087	0.214411	26.8217	1.80422e-158	4.16756e-157	UP
RP11-197N18.2	263.775	-2.67297	0.0996818	-26.815	2.16224e-158	4.98763e-157	DOWN
FOXA2	318.663	7.94673	0.296437	26.8075	2.64218e-158	6.09051e-157	UP
UCA1	2186.42	7.69083	0.287126	26.7855	4.76533e-158	1.09468e-156	UP
PODN	4167.53	-4.48916	0.167739	-26.7627	8.78566e-158	2.01545e-156	DOWN
NR4A1	25163.8	-4.69023	0.175278	-26.7588	9.763e-158	2.23812e-156	DOWN
DYDC2	169.683	4.93183	0.184458	26.7369	1.75138e-157	4.00156e-156	UP
RNF112	64.3579	-3.73495	0.139692	-26.7369	1.75153e-157	4.00156e-156	DOWN
RP11-373D23.2	27.3948	-5.11192	0.191291	-26.7232	2.53093e-157	5.77824e-156	DOWN
RP11-243M5.2	5.64894	-6.29206	0.235488	-26.7192	2.81797e-157	6.42918e-156	DOWN
CTHRC1	2374.84	4.38793	0.164238	26.7168	3.00204e-157	6.84444e-156	UP
ACSM1	39.0828	-3.27251	0.122501	-26.7141	3.22869e-157	7.35617e-156	DOWN
RMI2	838.114	2.752	0.103032	26.7101	3.59403e-157	8.1774e-156	UP
LRRK2	478.427	-3.76262	0.140881	-26.7078	3.82172e-157	8.68953e-156	DOWN
RP11-259P15.4	7.42333	-5.79589	0.217017	-26.7072	3.88674e-157	8.83136e-156	DOWN
RP11-3B7.1	23.7359	-3.57103	0.133712	-26.7069	3.909e-157	8.87591e-156	DOWN
RP11-45A17.4	18.1935	-3.95472	0.148135	-26.6966	5.14916e-157	1.16601e-155	DOWN
RP11-448G15.3	175.588	-3.16703	0.118669	-26.6879	6.5034e-157	1.46671e-155	DOWN
RAB11FIP4	2769.57	3.11545	0.116763	26.6818	7.66043e-157	1.72649e-155	UP
GALNT3	2607.78	2.96025	0.110951	26.6807	7.87388e-157	1.7734e-155	UP
RP3-333H23.9	13.3902	-4.65184	0.17438	-26.6764	8.83776e-157	1.98781e-155	DOWN
FHL5	122.072	-5.48683	0.205699	-26.674	9.42019e-157	2.11739e-155	DOWN
AC241585.2	575.809	2.80814	0.105304	26.6669	1.13951e-156	2.55957e-155	UP
NR1D1	1991.05	-2.80546	0.105291	-26.6448	2.05504e-156	4.60984e-155	DOWN
SEMA6A-AS1	39.6996	-3.2087	0.120445	-26.6403	2.31687e-156	5.19368e-155	DOWN
ARNTL2	495.743	3.82488	0.143625	26.631	2.9712e-156	6.64265e-155	UP
FAM132B	302.239	5.36358	0.20143	26.6275	3.26546e-156	7.29563e-155	UP
PIWIL2	60.4247	-3.63462	0.136526	-26.6221	3.76347e-156	8.39143e-155	DOWN
MPDZ	1401.15	-2.53862	0.0953642	-26.6203	3.95245e-156	8.80693e-155	DOWN
GPR37	181.44	4.74671	0.178335	26.6169	4.33181e-156	9.64579e-155	UP
TMC6	2361.49	2.55511	0.0960575	26.5998	6.82716e-156	1.51618e-154	UP
TYROBP	3837.01	3.68609	0.138609	26.5935	8.08132e-156	1.79233e-154	UP
AOX1	1353.05	-4.62963	0.174115	-26.5895	8.96891e-156	1.98654e-154	DOWN
NRTN	207.322	5.38257	0.202541	26.5751	1.31575e-155	2.91235e-154	UP
LINC00342	477.044	-3.12127	0.117483	-26.5679	1.59336e-155	3.5245e-154	DOWN
DOCK10	788.302	-3.03364	0.114259	-26.5506	2.53047e-155	5.59365e-154	DOWN
SYT12	470.888	4.73957	0.178583	26.5399	3.35829e-155	7.41377e-154	UP
RP11-645C24.5	59.4897	-3.43569	0.12948	-26.5345	3.87776e-155	8.55489e-154	DOWN
NUDT14	1347.94	2.77636	0.104671	26.5247	5.03496e-155	1.10932e-153	UP
C19orf81	99.5243	4.665	0.175915	26.5185	5.93573e-155	1.30692e-153	UP
BARX2	525.203	6.56125	0.247533	26.5066	8.14253e-155	1.79045e-153	UP
GRHL1	392.555	3.54286	0.133732	26.4923	1.18892e-154	2.61257e-153	UP
C4orf48	828.34	3.97064	0.149998	26.4713	2.0725e-154	4.55119e-153	UP
HPDL	289.852	3.2961	0.124531	26.4681	2.25906e-154	4.95762e-153	UP
HIST1H3G	167.34	7.5125	0.283999	26.4525	3.41089e-154	7.47553e-153	UP
WDR62	719.326	2.99913	0.113396	26.4483	3.81478e-154	8.35524e-153	UP
TSPAN12	1531.12	3.76453	0.142343	26.4468	3.96763e-154	8.67863e-153	UP
PRRT1	741.464	-3.10302	0.117361	-26.44	4.75638e-154	1.03971e-152	DOWN
STC2	1033.57	3.70391	0.140148	26.4285	6.4407e-154	1.40697e-152	UP
TAS2R20	27.2955	-3.20981	0.121459	-26.4271	6.69159e-154	1.46082e-152	DOWN
MORF4L2-AS1	66.0566	-3.38497	0.128088	-26.4268	6.73693e-154	1.46976e-152	DOWN
FAM103A2P	138.866	2.99636	0.113397	26.4236	7.33058e-154	1.59719e-152	UP
SGMS2	1156.66	2.84719	0.107756	26.4226	7.53394e-154	1.64042e-152	UP
ZEB2	1902.03	-2.94298	0.111389	-26.4207	7.9265e-154	1.72365e-152	DOWN
PAFAH1B3	2355.07	2.58062	0.0977862	26.3904	1.76627e-153	3.82838e-152	UP
TRIB1	3085.18	3.02143	0.114538	26.3794	2.36286e-153	5.11815e-152	UP
HAGLROS	536.413	4.07723	0.154588	26.3749	2.66082e-153	5.75982e-152	UP
TMC5	423.687	4.81617	0.182642	26.3695	3.07142e-153	6.64434e-152	UP
TSPAN13	1386.08	3.08695	0.117083	26.3655	3.40857e-153	7.36892e-152	UP
PROSER2	1008.9	2.70794	0.102776	26.348	5.4074e-153	1.16826e-151	UP
PLEK2	200.627	3.65199	0.138674	26.3351	7.60116e-153	1.63903e-151	UP
DARS-AS1	86.696	3.21944	0.12227	26.3306	8.5718e-153	1.84595e-151	UP
RALY-AS1	100.325	2.87691	0.10929	26.3237	1.02591e-152	2.20788e-151	UP
RP11-603J24.9	182.697	9.04175	0.343573	26.3168	1.23023e-152	2.64591e-151	UP
JHDM1D-AS1	274.443	2.78205	0.105732	26.3124	1.38425e-152	2.97525e-151	UP
TNXB	5153.45	-4.37381	0.166308	-26.2994	1.9469e-152	4.17385e-151	DOWN
VWA1	8040.75	2.63048	0.100033	26.2962	2.12231e-152	4.54698e-151	UP
RP5-855D21.1	35.3428	-3.71638	0.141411	-26.2807	3.19006e-152	6.82583e-151	DOWN
NOTUM	355.665	7.43406	0.282945	26.2739	3.81583e-152	8.15957e-151	UP
HOXD1	1047.04	5.61024	0.213538	26.2728	3.92038e-152	8.37778e-151	UP
STK17B	1671.72	2.71598	0.103377	26.2726	3.941e-152	8.41645e-151	UP
ALDH1L1	1066.29	-4.99237	0.190034	-26.2709	4.12334e-152	8.79461e-151	DOWN
ARMC3	280.33	5.87485	0.22364	26.2693	4.30708e-152	9.18064e-151	UP
NEIL1	778.191	-2.85063	0.108529	-26.2661	4.68032e-152	9.96985e-151	DOWN
FAM72C	133.9	3.93653	0.149896	26.2618	5.24503e-152	1.11657e-150	UP
PPAPDC1A	260.865	5.70408	0.217258	26.2549	6.28894e-152	1.33794e-150	UP
IGSF10	2232.88	-4.34145	0.165383	-26.2508	6.99195e-152	1.48561e-150	DOWN
AC007009.1	106.885	6.22343	0.237143	26.2434	8.50263e-152	1.80544e-150	UP
IGSF3	809.44	3.03216	0.115593	26.2314	1.16382e-151	2.46811e-150	UP
P2RY2	340.338	3.33658	0.127205	26.2301	1.20705e-151	2.55816e-150	UP
SLC30A2	234.437	7.57742	0.288929	26.2259	1.34659e-151	2.85209e-150	UP
PROM2	3741.36	4.07808	0.15552	26.2222	1.48316e-151	3.13936e-150	UP
RHOBTB3	2566.58	-3.45157	0.131661	-26.2155	1.76917e-151	3.74238e-150	DOWN
JAKMIP3	121.205	-4.49555	0.171507	-26.212	1.93894e-151	4.09372e-150	DOWN
RP11-524F11.1	26.3226	-3.03449	0.115769	-26.2115	1.96359e-151	4.14315e-150	DOWN
LRRN4CL	452.565	-3.7251	0.14216	-26.2035	2.42109e-151	5.10522e-150	DOWN
RP11-390F4.6	76.6753	7.39452	0.282267	26.197	2.87852e-151	6.06595e-150	UP
SPATA9	12.8258	-3.07095	0.117364	-26.166	6.48539e-151	1.36324e-149	DOWN
PLEKHN1	146.356	4.21975	0.161344	26.1537	8.93589e-151	1.87716e-149	UP
HAND2	623.182	-4.81082	0.184105	-26.1309	1.62307e-150	3.40529e-149	DOWN
MPZL2	3001.21	3.31175	0.126771	26.1238	1.95546e-150	4.10007e-149	UP
ADD2	881.49	4.17029	0.159636	26.1237	1.96056e-150	4.1082e-149	UP
SULT2B1	204.144	5.39711	0.206705	26.1102	2.79558e-150	5.84326e-149	UP
CRIP2	14334.1	2.70852	0.103812	26.0906	4.65611e-150	9.71992e-149	UP
ST13P3	11.2934	-2.95063	0.113102	-26.0883	4.95558e-150	1.03322e-148	DOWN
RP11-288H12.3	93.3638	-2.97652	0.114138	-26.0783	6.43443e-150	1.33821e-148	DOWN
FAM72A	198.046	2.76744	0.106179	26.0639	9.3659e-150	1.94546e-148	UP
RP3-512B11.3	94.9078	3.7717	0.144785	26.0503	1.33562e-149	2.76743e-148	UP
NDRG2	8228.66	-3.54539	0.136107	-26.0486	1.39416e-149	2.88695e-148	DOWN
BACE2	6007.09	2.80727	0.107782	26.0459	1.49667e-149	3.09537e-148	UP
RP11-510N19.5	134.761	5.42206	0.20821	26.0413	1.68884e-149	3.49065e-148	UP
RP11-73M7.6	14.3319	-3.91466	0.150404	-26.0276	2.41548e-149	4.98946e-148	DOWN
TSC22D3	6235.68	-2.90927	0.111828	-26.0155	3.3104e-149	6.83378e-148	DOWN
CUBN	249.793	-3.47706	0.133666	-26.013	3.5277e-149	7.27338e-148	DOWN
RP11-27G14.4	48.8766	6.61208	0.254251	26.0062	4.21868e-149	8.69266e-148	UP
NRARP	712.19	2.89555	0.111363	26.0011	4.81678e-149	9.91895e-148	UP
RP11-96C23.13	44.1088	-3.67263	0.141285	-25.9945	5.70996e-149	1.1751e-147	DOWN
TMPRSS13	394.922	5.1305	0.197405	25.9898	6.46564e-149	1.32898e-147	UP
RP11-1299A16.3	23.2948	-3.90551	0.150291	-25.9864	7.05362e-149	1.44894e-147	DOWN
KIT	624.294	-4.43649	0.170747	-25.9828	7.74337e-149	1.58868e-147	DOWN
RIBC2	169.342	3.96742	0.152712	25.9798	8.38245e-149	1.71768e-147	UP
PRRX2	1040.46	4.4707	0.172096	25.978	8.7826e-149	1.79858e-147	UP
HOXB5	591.966	6.05191	0.233108	25.9619	1.33567e-148	2.73195e-147	UP
ECM2	899.38	-3.71876	0.143263	-25.9575	1.49734e-148	3.05888e-147	DOWN
TCEB1P19	10.7383	-3.04955	0.117537	-25.9455	2.04459e-148	4.17174e-147	DOWN
TNFRSF9	95.8209	6.45811	0.248976	25.9387	2.44116e-148	4.97785e-147	UP
RP11-800A3.4	341.033	3.72836	0.143761	25.9343	2.73205e-148	5.56761e-147	UP
ITGB7	391.813	3.32926	0.128399	25.929	3.13595e-148	6.38682e-147	UP
IGFBP5	67464.3	-3.93269	0.151694	-25.9251	3.4703e-148	7.05917e-147	DOWN
GCNT1	495.522	2.81286	0.108511	25.9223	3.73734e-148	7.59775e-147	UP
RASSF9	1214.99	2.78382	0.107427	25.9136	4.6839e-148	9.50468e-147	UP
MT1H	463.963	7.66889	0.295974	25.9107	5.04929e-148	1.02337e-146	UP
ASCL2	274.493	5.0247	0.193957	25.9063	5.65521e-148	1.14548e-146	UP
PLA2R1	612.279	-2.7343	0.105579	-25.8981	6.99001e-148	1.41499e-146	DOWN
LGI4	289.454	-4.01563	0.155097	-25.891	8.40848e-148	1.70007e-146	DOWN
SERPINA1	4225.65	4.44186	0.171607	25.8839	1.0116e-147	2.04407e-146	UP
RRP7BP	985.022	-2.55809	0.0988416	-25.8807	1.09839e-147	2.21543e-146	DOWN
C10orf95	177.337	3.53608	0.136642	25.8785	1.16355e-147	2.34401e-146	UP
FHL2	6802.4	-2.83685	0.109658	-25.87	1.44992e-147	2.91916e-146	DOWN
CNGB1	91.454	7.22194	0.279214	25.8652	1.64001e-147	3.29788e-146	UP
ARFGEF3	593.02	3.42267	0.132335	25.8636	1.7092e-147	3.43496e-146	UP
LRRC55	547.436	6.42759	0.248559	25.8595	1.90409e-147	3.82203e-146	UP
GPRIN2	139.967	4.80204	0.185806	25.8443	2.81907e-147	5.64508e-146	UP
AC006011.4	158.327	2.55051	0.098745	25.8292	4.16598e-147	8.3372e-146	UP
RP3-402G11.27	22.595	-3.10419	0.120223	-25.8203	5.24911e-147	1.04985e-145	DOWN
RPL29P11	27.2818	-3.12283	0.120997	-25.8093	6.97856e-147	1.39325e-145	DOWN
RP13-890H12.2	103.193	3.63195	0.140898	25.7771	1.60083e-146	3.19221e-145	UP
MIR503HG	326.811	-4.41634	0.171429	-25.762	2.36823e-146	4.71122e-145	DOWN
HOXB8	805.265	7.37672	0.286383	25.7583	2.60458e-146	5.17831e-145	UP
TPSG1	12.3385	-5.54863	0.215538	-25.7432	3.83924e-146	7.62393e-145	DOWN
CTB-50L17.8	99.2859	-2.55972	0.0994775	-25.7317	5.17188e-146	1.0252e-144	DOWN
COX7B	7146.13	2.57461	0.100064	25.7296	5.45939e-146	1.08155e-144	UP
SCUBE1	1400.07	-5.6901	0.221165	-25.7278	5.70828e-146	1.13018e-144	DOWN
RP1-92O14.3	114.06	4.67766	0.181818	25.7271	5.81969e-146	1.15156e-144	UP
NR4A2	3359.64	-3.93044	0.152864	-25.712	8.59138e-146	1.69699e-144	DOWN
AC019117.1	192.757	8.43	0.327975	25.7031	1.07794e-145	2.12665e-144	UP
AMN	493.353	3.79562	0.147747	25.6901	1.5083e-145	2.9687e-144	UP
CFAP126	507.072	7.32491	0.28527	25.6771	2.10756e-145	4.14086e-144	UP
RP11-334A14.8	16.6911	-6.13295	0.238861	-25.6759	2.1751e-145	4.27105e-144	DOWN
NOS1AP	227.569	2.81349	0.10964	25.6612	3.16981e-145	6.20967e-144	UP
SCX	1115.68	4.22508	0.164656	25.66	3.2723e-145	6.40669e-144	UP
TRPM2	676.46	2.76454	0.107757	25.6554	3.68101e-145	7.19845e-144	UP
KLHDC8A	5329.32	-4.87373	0.190035	-25.6465	4.62236e-145	9.01293e-144	DOWN
GAPDHP1	134.141	3.16999	0.123626	25.6417	5.22686e-145	1.01797e-143	UP
RTN4R	797.948	2.81376	0.109764	25.6346	6.27428e-145	1.22125e-143	UP
ICOSLG	780.329	2.98983	0.116652	25.6304	7.00074e-145	1.36107e-143	UP
RP11-1055B8.4	163.42	-5.90538	0.23059	-25.6098	1.18604e-144	2.30185e-143	DOWN
RBMS3	720.229	-3.10083	0.121094	-25.6069	1.2786e-144	2.48005e-143	DOWN
PTAFR	833.075	3.46982	0.135522	25.6033	1.40084e-144	2.71558e-143	UP
LA16c-358B7.3	311.676	-2.77434	0.108368	-25.6011	1.48234e-144	2.8719e-143	DOWN
LIN7A	156.365	-3.23718	0.126457	-25.599	1.56352e-144	3.02568e-143	DOWN
SDS	396.121	3.81333	0.148971	25.5979	1.61171e-144	3.11712e-143	UP
HOXB2	2175.12	3.97147	0.155157	25.5965	1.66899e-144	3.22604e-143	UP
RP11-70D24.2	31.5373	-4.42687	0.173024	-25.5853	2.22622e-144	4.30064e-143	DOWN
FRMPD3	139.588	-4.24646	0.166041	-25.5748	2.91008e-144	5.61199e-143	DOWN
LINC01088	52.7183	-4.48504	0.175438	-25.5648	3.76362e-144	7.25381e-143	DOWN
AC005104.3	15.2429	-3.06096	0.119762	-25.5587	4.39366e-144	8.45837e-143	DOWN
RP11-475B2.1	5.48399	-5.83346	0.228245	-25.5579	4.48041e-144	8.62041e-143	DOWN
PDGFD	1413.85	-3.26917	0.127917	-25.5569	4.60163e-144	8.84854e-143	DOWN
NID1	4285.97	-3.07029	0.120144	-25.555	4.83295e-144	9.28799e-143	DOWN
LINC01229	9.99239	-4.91719	0.192466	-25.5484	5.72163e-144	1.09832e-142	DOWN
GRIA3	80.621	-4.44837	0.174161	-25.5418	6.77949e-144	1.30064e-142	DOWN
HIST1H2AG	152.746	4.18879	0.164001	25.5413	6.85836e-144	1.31502e-142	UP
CA2	400.068	3.84855	0.150715	25.5353	8.00615e-144	1.53421e-142	UP
HPN	2333.67	4.77328	0.186943	25.5333	8.42445e-144	1.61345e-142	UP
RP11-212P7.3	84.365	3.71138	0.145362	25.5319	8.71332e-144	1.66782e-142	UP
U1	816.862	7.30097	0.28597	25.5306	9.0267e-144	1.72681e-142	UP
FAM153B	1519.86	-4.91935	0.192702	-25.5283	9.5719e-144	1.83006e-142	DOWN
RNU1-2	816.829	7.32825	0.287091	25.5259	1.01816e-143	1.94328e-142	UP
RNU1-27P	816.829	7.32825	0.287091	25.5259	1.01816e-143	1.94328e-142	UP
RNU1-4	816.829	7.32825	0.287091	25.5259	1.01816e-143	1.94328e-142	UP
STON2	1891.65	2.98279	0.116861	25.5242	1.06179e-143	2.02426e-142	UP
AC005154.7	37.78	-3.37166	0.132108	-25.522	1.12247e-143	2.13792e-142	DOWN
MAPK15	1820	4.13745	0.162113	25.522	1.12269e-143	2.13792e-142	UP
RNFT2	397.387	2.71411	0.106401	25.5083	1.59457e-143	3.03132e-142	UP
GNG11	1546.03	-2.97854	0.116771	-25.5076	1.62386e-143	3.08524e-142	DOWN
FAM198B	2682.28	-3.03425	0.118967	-25.5049	1.74033e-143	3.30277e-142	DOWN
RP11-347C12.10	172.365	2.74653	0.107722	25.4964	2.1586e-143	4.08726e-142	UP
FAM83E	207.465	5.64063	0.221296	25.4891	2.60572e-143	4.92272e-142	UP
ROBO3	1591.74	-3.47769	0.136484	-25.4805	3.24066e-143	6.11879e-142	DOWN
RP11-256I23.3	6.61437	-5.31029	0.208526	-25.4659	4.70396e-143	8.86164e-142	DOWN
POU5F1P3	17.2656	-3.45988	0.135866	-25.4654	4.77243e-143	8.9805e-142	DOWN
APOC4-APOC2	293.781	4.64256	0.182329	25.4625	5.13163e-143	9.64555e-142	UP
RP11-64K12.8	5.21447	-3.81246	0.149764	-25.4564	5.99554e-143	1.1263e-141	DOWN
CHODL	716.364	3.95515	0.155389	25.4533	6.48805e-143	1.21814e-141	UP
RP11-589M4.4	6.33364	-3.74573	0.147249	-25.438	9.58787e-143	1.79812e-141	DOWN
ITGB4	11689.1	3.7241	0.146424	25.4337	1.07072e-142	2.0069e-141	UP
CCL28	1568.06	3.8796	0.15256	25.43	1.17572e-142	2.20001e-141	UP
CCDC116	18.574	-3.32647	0.130818	-25.4282	1.22975e-142	2.29982e-141	DOWN
RP4-794I6.4	148.227	5.02443	0.197645	25.4215	1.4584e-142	2.72438e-141	UP
FGF22	35.4904	-4.85007	0.190795	-25.4203	1.50592e-142	2.81e-141	DOWN
HOXB6	695.251	5.65115	0.22231	25.4201	1.51057e-142	2.81712e-141	UP
COL9A2	2431.99	4.46139	0.175578	25.4097	1.97101e-142	3.67171e-141	UP
KLK13	268.099	5.05225	0.198843	25.4083	2.044e-142	3.80555e-141	UP
CTD-2006M22.2	47.3753	-4.06043	0.159811	-25.4077	2.07245e-142	3.85638e-141	DOWN
RUNX3	1487.99	4.75271	0.187075	25.4053	2.20459e-142	4.09997e-141	UP
NDUFA7	3118.14	2.6728	0.105229	25.3998	2.53153e-142	4.70277e-141	UP
RDM1	58.8308	5.82667	0.229443	25.3949	2.87466e-142	5.33721e-141	UP
SH2D3A	880.05	2.75485	0.108482	25.3944	2.905e-142	5.39054e-141	UP
CTD-2010I16.1	17.1724	-2.58668	0.101931	-25.3767	4.55972e-142	8.43763e-141	DOWN
FAM53B-AS1	4.42852	-3.79158	0.149487	-25.364	6.29828e-142	1.16419e-140	DOWN
AVPI1	1100.18	-2.63266	0.103807	-25.361	6.79821e-142	1.2559e-140	DOWN
RP3-329A5.8	122.058	-3.18607	0.125666	-25.3534	8.2476e-142	1.52198e-140	DOWN
RNU1-1	797.388	7.29343	0.28785	25.3376	1.23018e-141	2.26262e-140	UP
RNU1-28P	797.388	7.29343	0.28785	25.3376	1.23018e-141	2.26262e-140	UP
RNU1-3	797.388	7.29343	0.28785	25.3376	1.23018e-141	2.26262e-140	UP
RNVU1-18	797.388	7.29343	0.28785	25.3376	1.23018e-141	2.26262e-140	UP
CCDC88C	1663.41	2.64513	0.104503	25.3115	2.38926e-141	4.38241e-140	UP
VWA2	203.364	4.54177	0.179495	25.3031	2.95167e-141	5.40804e-140	UP
TCF23	582.476	-4.18703	0.165479	-25.3025	2.99809e-141	5.49009e-140	DOWN
LILRB4	720.234	4.015	0.158855	25.2746	6.07508e-141	1.10942e-139	UP
C6orf165	188.39	4.06635	0.160959	25.2633	8.09859e-141	1.47815e-139	UP
MAOA	1344.49	-3.5915	0.142256	-25.2468	1.22711e-140	2.23849e-139	DOWN
RPL36AP43	4.73913	-3.74895	0.148516	-25.2428	1.35801e-140	2.47592e-139	DOWN
LINC00152	515.303	2.96035	0.117369	25.2225	2.26936e-140	4.13072e-139	UP
C9orf152	200.924	5.80263	0.230108	25.2169	2.61186e-140	4.7464e-139	UP
CTD-2020K17.4	73.8098	4.40898	0.17487	25.2129	2.89184e-140	5.24947e-139	UP
LINC00473	752.15	-8.14385	0.323023	-25.2113	3.00965e-140	5.4574e-139	DOWN
MAGI2-AS3	1240.32	-3.52899	0.139999	-25.2072	3.33601e-140	6.04592e-139	DOWN
CX3CR1	459.344	4.60402	0.182699	25.2	4.00133e-140	7.24774e-139	UP
HERC2P2	3094.74	-2.87499	0.114107	-25.1956	4.48168e-140	8.11341e-139	DOWN
PROM1	855.24	6.14302	0.243831	25.1938	4.68774e-140	8.47728e-139	UP
KCTD8	27.0319	-5.3816	0.213746	-25.1775	7.06473e-140	1.27482e-138	DOWN
RP11-490B18.6	10.2653	-2.96856	0.117908	-25.1769	7.17721e-140	1.29442e-138	DOWN
CD52	554.195	4.1977	0.166765	25.1713	8.27195e-140	1.49105e-138	UP
RP11-395I14.2	5.96376	-4.10325	0.163039	-25.1673	9.14526e-140	1.64669e-138	DOWN
RP3-368A4.6	309.062	-2.64921	0.1053	-25.1586	1.13753e-139	2.04492e-138	DOWN
DACT2	445.021	5.53988	0.22025	25.1526	1.32232e-139	2.37583e-138	UP
SLC39A4	4778.04	3.05768	0.121597	25.1461	1.55844e-139	2.79707e-138	UP
SGK1	6713.59	-2.94252	0.117133	-25.1212	2.91543e-139	5.21857e-138	DOWN
PKMP3	35.8122	-3.08062	0.122634	-25.1205	2.97264e-139	5.31812e-138	DOWN
NDUFC2	11620.5	2.80485	0.111657	25.1203	2.98731e-139	5.34149e-138	UP
RP13-554M15.2	36.9012	-3.39403	0.135171	-25.1091	3.95819e-139	7.06237e-138	DOWN
GADD45G	627.234	-2.86868	0.114268	-25.1049	4.40056e-139	7.84747e-138	DOWN
FUT3	176.802	5.15245	0.205308	25.0962	5.47792e-139	9.75829e-138	UP
NFE2	225.515	4.62739	0.184498	25.081	8.0181e-139	1.42681e-137	UP
PID1	454.994	-3.87315	0.154442	-25.0784	8.56014e-139	1.52246e-137	DOWN
CTRL	37.9305	-2.80758	0.111968	-25.0748	9.37582e-139	1.66575e-137	DOWN
RP11-311P8.2	19.5666	-2.66453	0.106279	-25.071	1.03053e-138	1.82991e-137	DOWN
AGAP11	198.976	-4.37035	0.174321	-25.0707	1.0389e-138	1.8438e-137	DOWN
RAB40A	90.615	-2.82279	0.112644	-25.0594	1.37782e-138	2.44271e-137	DOWN
OXGR1	245.421	5.15082	0.205753	25.034	2.6076e-138	4.61072e-137	UP
DENND2A	600.683	-3.50439	0.140047	-25.023	3.43721e-138	6.0712e-137	DOWN
HIST1H2BK	1630.82	3.28925	0.131475	25.0181	3.88165e-138	6.84897e-137	UP
SCARNA7	97.9261	5.24527	0.209685	25.0151	4.19172e-138	7.39217e-137	UP
RP1-223E5.4	124.407	3.45274	0.138035	25.0135	4.36371e-138	7.69141e-137	UP
NPFFR1	411.671	4.47961	0.179139	25.0063	5.22099e-138	9.1976e-137	UP
RP11-75L1.2	78.6643	-2.65078	0.106027	-25.0011	5.95398e-138	1.04833e-136	DOWN
C1QL4	309.862	7.27866	0.291136	25.0009	5.97137e-138	1.05084e-136	UP
RP3-402G11.25	19.3708	-2.94513	0.117829	-24.9949	6.94316e-138	1.22057e-136	DOWN
CASC15	187.457	-3.24344	0.129844	-24.9795	1.02035e-137	1.7909e-136	DOWN
RP11-57A19.2	63.1012	5.6034	0.224426	24.9677	1.37204e-137	2.40438e-136	UP
STYK1	103.705	4.1912	0.167873	24.9665	1.413e-137	2.47485e-136	UP
RP11-617B3.2	1.76419	-5.58752	0.223801	-24.9664	1.41599e-137	2.4788e-136	DOWN
RP11-171I2.1	8.37915	-5.07072	0.203158	-24.9596	1.68111e-137	2.94137e-136	DOWN
ALDH1L1-AS2	50.2694	-6.22279	0.249356	-24.9555	1.863e-137	3.25621e-136	DOWN
RP11-679B19.1	44.8276	-3.91012	0.156701	-24.9527	1.99457e-137	3.48435e-136	DOWN
RP11-126K1.6	75.7275	4.22981	0.16952	24.9517	2.04782e-137	3.5755e-136	UP
AARD	175.239	5.20601	0.208689	24.9463	2.34228e-137	4.08535e-136	UP
AC104667.3	66.9405	4.7492	0.190389	24.9448	2.43304e-137	4.24144e-136	UP
RP11-5O17.1	68.5005	3.6239	0.145279	24.9444	2.45684e-137	4.2807e-136	UP
NANOS1	231.845	3.73548	0.14985	24.928	3.69646e-137	6.4372e-136	UP
CH507-513H4.5	357.64	4.44859	0.178638	24.9028	6.93766e-137	1.20627e-135	UP
TIMP2	25817.7	-2.52986	0.101598	-24.9008	7.29764e-137	1.2682e-135	DOWN
PROX1	245.788	-4.53601	0.182272	-24.886	1.05476e-136	1.83108e-135	DOWN
PITPNM3	1853.27	-2.68705	0.107978	-24.8851	1.07871e-136	1.8717e-135	DOWN
CXorf57	156.743	-4.92614	0.197959	-24.8846	1.09269e-136	1.89496e-135	DOWN
DMTN	1725.41	3.15094	0.126649	24.8793	1.24579e-136	2.15822e-135	UP
KIAA1755	280.686	-4.16436	0.167481	-24.8647	1.7913e-136	3.09846e-135	DOWN
TSPAN33	971.923	2.63754	0.106079	24.864	1.82592e-136	3.15671e-135	UP
RP11-203M5.7	16.5592	-3.09705	0.124592	-24.8575	2.14739e-136	3.70863e-135	DOWN
MAL	3713.77	5.36649	0.215996	24.8453	2.90368e-136	5.00701e-135	UP
PLA2G4B	622.371	-3.38561	0.136281	-24.8428	3.0917e-136	5.32848e-135	DOWN
IGKV1D-33	614.225	11.3328	0.456188	24.8425	3.1167e-136	5.36879e-135	UP
TMEM200B	646.076	-3.56366	0.143461	-24.8406	3.26604e-136	5.62315e-135	DOWN
KLHL33	7.06894	-4.81893	0.19402	-24.8373	3.54689e-136	6.10355e-135	DOWN
ITGA8	298.911	-3.63082	0.146223	-24.8307	4.1786e-136	7.18689e-135	DOWN
LL0XNC01-240C2.1	21.8619	-4.36273	0.175708	-24.8295	4.30869e-136	7.40682e-135	DOWN
DAPP1	302.605	3.55173	0.143068	24.8255	4.75141e-136	8.15947e-135	UP
AC064875.2	21.6193	-4.61754	0.186082	-24.8145	6.25136e-136	1.07188e-134	DOWN
TFCP2L1	665.591	4.43028	0.178615	24.8035	8.2237e-136	1.40934e-134	UP
RP11-632F7.3	3.83638	-4.36681	0.176081	-24.8	8.96763e-136	1.53604e-134	DOWN
USP2-AS1	127.806	3.59923	0.145146	24.7973	9.59861e-136	1.64328e-134	UP
RP5-1024N4.4	25.6043	-4.27013	0.172227	-24.7936	1.05026e-135	1.79712e-134	DOWN
SDR42E1	402.171	3.34036	0.134744	24.7904	1.1379e-135	1.94509e-134	UP
DLEU2L	28.8384	-3.2863	0.13258	-24.7873	1.22919e-135	2.09791e-134	DOWN
LY6G6C	465.337	5.41669	0.218582	24.781	1.43735e-135	2.45194e-134	UP
RP11-30L15.4	24.3162	-3.15107	0.12716	-24.7803	1.46161e-135	2.49206e-134	DOWN
SPATA17	205.286	3.57369	0.144225	24.7786	1.52654e-135	2.60143e-134	UP
AP000473.5	35.902	-3.80912	0.153887	-24.7528	2.89544e-135	4.92918e-134	DOWN
ALOX12P2	305.76	3.86345	0.156096	24.7504	3.06871e-135	5.2215e-134	UP
RAB39B	181.477	3.45597	0.139644	24.7484	3.22726e-135	5.48569e-134	UP
ELFN1-AS1	304.637	6.37604	0.257718	24.7404	3.93601e-135	6.68361e-134	UP
GREB1	9177.03	-4.25545	0.172039	-24.7354	4.4533e-135	7.55433e-134	DOWN
IGDCC4	596.375	-3.36307	0.13604	-24.7211	6.33748e-135	1.07396e-133	DOWN
RP11-661O13.1	7.6303	-3.37208	0.136487	-24.7062	9.18144e-135	1.55354e-133	DOWN
TMEM160	929.846	2.65904	0.107684	24.693	1.27263e-134	2.15226e-133	UP
CTC-366B18.4	26.0787	-2.57614	0.104365	-24.684	1.58874e-134	2.68415e-133	DOWN
LGALS9	4806.76	2.861	0.115905	24.6839	1.5912e-134	2.68694e-133	UP
ASPA	83.6314	-4.7954	0.194346	-24.6746	2.0047e-134	3.38348e-133	DOWN
LINC01503	879.228	3.91146	0.15856	24.6687	2.3216e-134	3.91636e-133	UP
VSTM4	1189.55	-3.55314	0.14404	-24.6678	2.37233e-134	3.9979e-133	DOWN
MYH11	6940.28	-5.17999	0.210256	-24.6366	5.12595e-134	8.61227e-133	DOWN
CTD-2012K14.5	21.7399	-3.40416	0.138243	-24.6245	6.90591e-134	1.15912e-132	DOWN
FAM106A	21.771	-4.61692	0.187508	-24.6225	7.24712e-134	1.21578e-132	DOWN
C2	4336.63	3.40625	0.13834	24.6223	7.29752e-134	1.22362e-132	UP
RP11-53M11.5	36.9924	6.14471	0.249645	24.6138	8.98107e-134	1.5044e-132	UP
LPAR5	329.539	2.99658	0.12176	24.6106	9.72726e-134	1.62857e-132	UP
CTC-529I10.2	37.9684	-2.64065	0.107307	-24.6083	1.03015e-133	1.72385e-132	DOWN
TREM2	579.723	3.76528	0.153052	24.6013	1.22458e-133	2.04715e-132	UP
YBX2	520.464	3.70884	0.150803	24.594	1.46531e-133	2.44836e-132	UP
TPBGL	498.576	5.01478	0.203931	24.5906	1.59302e-133	2.66042e-132	UP
CMPK2	1068.99	3.31684	0.134889	24.5894	1.64152e-133	2.74006e-132	UP
RP11-2K6.1	81.3929	3.76537	0.153163	24.584	1.87225e-133	3.12207e-132	UP
LINC01296	1144.18	4.13058	0.168028	24.5827	1.93277e-133	3.22138e-132	UP
FAM65C	371.045	-3.66264	0.148994	-24.5824	1.9499e-133	3.24831e-132	DOWN
IRF5	677.955	2.58031	0.105034	24.5663	2.89282e-133	4.8119e-132	UP
TCEAL7	203.184	-3.5536	0.144679	-24.5619	3.22423e-133	5.3605e-132	DOWN
ST8SIA2	188.765	6.05391	0.246547	24.5548	3.84599e-133	6.39104e-132	UP
LYPD2	897.878	8.69898	0.354411	24.5449	4.90307e-133	8.13954e-132	UP
APLP1	1785.42	4.49034	0.183082	24.5264	7.71951e-133	1.2796e-131	UP
LY6G5B	611.937	-2.71961	0.110892	-24.5248	8.03711e-133	1.33158e-131	DOWN
PLEKHS1	758.379	6.80574	0.277556	24.5203	8.98094e-133	1.48722e-131	UP
METRN	1939.99	3.14876	0.128447	24.514	1.04647e-132	1.73035e-131	UP
C9orf116	484.495	3.02261	0.123362	24.5019	1.40992e-132	2.32672e-131	UP
PRAME	4031.4	3.80655	0.155374	24.4993	1.50117e-132	2.47485e-131	UP
SLC43A1	523.972	-2.75624	0.112515	-24.4967	1.60188e-132	2.63698e-131	DOWN
CHST4	172.931	5.37322	0.219349	24.4961	1.62369e-132	2.67157e-131	UP
NME1	5041.33	2.55505	0.104307	24.4956	1.64636e-132	2.7062e-131	UP
DNAH5	161.436	4.14616	0.169282	24.4927	1.76821e-132	2.90507e-131	UP
LPO	104.306	5.84256	0.238626	24.4842	2.17541e-132	3.57231e-131	UP
IL18	635.577	3.29635	0.134677	24.476	2.66419e-132	4.37067e-131	UP
SORT1	8687.37	2.61835	0.106983	24.4744	2.77105e-132	4.54372e-131	UP
FBP1	572.072	3.77168	0.154129	24.4709	3.01419e-132	4.94e-131	UP
PABPC1P7	4.02071	-3.84386	0.157165	-24.4575	4.18558e-132	6.84636e-131	DOWN
MAGOH2P	10.0022	-3.27581	0.133991	-24.4479	5.29621e-132	8.65454e-131	DOWN
TTYH2	667.253	-2.69434	0.110239	-24.4409	6.28634e-132	1.02625e-130	DOWN
SYNGR1	1842.35	-3.1074	0.127179	-24.4334	7.56063e-132	1.23247e-130	DOWN
PHLDA2	857.224	3.84378	0.157366	24.4258	9.10879e-132	1.48266e-130	UP
RP11-164J13.1	247.237	-3.30321	0.135272	-24.419	1.07388e-131	1.74629e-130	DOWN
AC004870.4	78.0574	7.4534	0.305244	24.4178	1.10604e-131	1.79683e-130	UP
GNB3	220.94	-3.72128	0.152413	-24.4157	1.16533e-131	1.89223e-130	DOWN
KCNIP2	192.051	-2.88268	0.118079	-24.4131	1.24065e-131	2.01355e-130	DOWN
ZNF385B	188.272	-4.77019	0.195428	-24.4089	1.37495e-131	2.22936e-130	DOWN
SLC27A2	111.187	3.77598	0.1547	24.4084	1.39437e-131	2.25974e-130	UP
TRPV4	302.381	3.30354	0.13537	24.4037	1.56213e-131	2.53039e-130	UP
DLX4	85.1959	4.89422	0.200643	24.3927	2.04282e-131	3.30743e-130	UP
RP11-651L5.3	65.3278	-2.76487	0.113381	-24.3856	2.43235e-131	3.93237e-130	DOWN
RP1-182D15.2	2.44204	-4.98158	0.204332	-24.3798	2.80208e-131	4.52575e-130	DOWN
RP11-283G6.3	78.6668	4.98508	0.204633	24.3611	4.42567e-131	7.13426e-130	UP
GS1-184P14.2	54.9836	4.15247	0.170514	24.3526	5.43841e-131	8.76259e-130	UP
RP11-286N22.14	40.7992	-2.773	0.11389	-24.348	6.08865e-131	9.80555e-130	DOWN
HSF4	938.784	-3.15379	0.129603	-24.3342	8.51898e-131	1.37129e-129	DOWN
CTD-2536I1.3	7.36825	-5.33013	0.219061	-24.3318	9.04561e-131	1.45536e-129	DOWN
PLAU	2511.19	4.12768	0.169652	24.3303	9.37217e-131	1.50717e-129	UP
LTB	515.231	4.91309	0.201979	24.3247	1.0737e-130	1.72583e-129	UP
CTC-524C5.2	282.287	-2.63447	0.108379	-24.3079	1.61652e-130	2.59458e-129	DOWN
PLCL2	497.108	-2.52106	0.103765	-24.2958	2.17203e-130	3.48118e-129	DOWN
PRDX3P1	13.8033	-3.44937	0.142013	-24.2891	2.5568e-130	4.09395e-129	DOWN
KLF2	2332.36	-3.3253	0.137037	-24.2657	4.51461e-130	7.20461e-129	DOWN
CHAC2	159.038	2.63056	0.108483	24.2485	6.85212e-130	1.09245e-128	UP
PDZRN3	1816.62	-2.99308	0.12344	-24.2473	7.05328e-130	1.12345e-128	DOWN
CTB-31O20.4	100.903	-2.6195	0.108067	-24.2395	8.53576e-130	1.35763e-128	DOWN
RNF144B	2385.5	3.25081	0.134179	24.2274	1.14403e-129	1.81787e-128	UP
CA9	1055.85	5.27175	0.217692	24.2166	1.4883e-129	2.36268e-128	UP
RP11-787I22.3	23.0251	-3.35593	0.138586	-24.2155	1.52799e-129	2.42453e-128	DOWN
ZIM2	57.8077	-4.85443	0.200516	-24.2097	1.75896e-129	2.7897e-128	DOWN
LCN6	48.2247	-5.68385	0.234786	-24.2086	1.80453e-129	2.86061e-128	DOWN
NAALAD2	239.656	-3.7023	0.152951	-24.2057	1.93776e-129	3.07035e-128	DOWN
CABLES1	1755.78	2.51496	0.103923	24.2003	2.21025e-129	3.50045e-128	UP
RHOV	220.825	3.93441	0.162622	24.1936	2.59706e-129	4.1111e-128	UP
FABP5	1376	2.77269	0.114606	24.1932	2.62452e-129	4.15262e-128	UP
OBP2A	725.917	7.97026	0.329466	24.1914	2.73728e-129	4.32897e-128	UP
RAB17	694.251	2.54791	0.105381	24.1781	3.77869e-129	5.96747e-128	UP
ADAP1	864.265	2.92916	0.121195	24.169	4.71156e-129	7.43367e-128	UP
RN7SL417P	6.88294	-4.47556	0.185184	-24.1682	4.80466e-129	7.57698e-128	DOWN
OXCT2P1	68.5344	-4.30202	0.178031	-24.1645	5.25611e-129	8.28501e-128	DOWN
INA	329.711	6.23524	0.258132	24.1552	6.58143e-129	1.03643e-127	UP
RHBDL2	174.276	3.3075	0.136948	24.1514	7.21828e-129	1.13618e-127	UP
SOX11	559.982	8.84877	0.366445	24.1476	7.91795e-129	1.24572e-127	UP
ADAMTSL4	1340.95	-2.94312	0.121882	-24.1472	7.98146e-129	1.25513e-127	DOWN
RP11-268J15.5	334.765	-2.78999	0.115561	-24.1431	8.82623e-129	1.38601e-127	DOWN
IGFBP1	300.721	-6.21027	0.257242	-24.1417	9.12787e-129	1.43271e-127	DOWN
2025-03-02	446.077	-2.64581	0.109611	-24.1381	9.95667e-129	1.56206e-127	DOWN
RP11-348N5.7	34.6683	-2.75771	0.114286	-24.1299	1.21394e-128	1.90361e-127	DOWN
TMEM108	337.862	4.15048	0.17202	24.1279	1.27314e-128	1.9955e-127	UP
NCMAP	105.902	4.56981	0.189586	24.1042	2.26131e-128	3.53937e-127	UP
MMP9	2029.38	5.16613	0.214334	24.1032	2.31151e-128	3.61625e-127	UP
RAB19	29.5016	6.0151	0.249592	24.0997	2.51506e-128	3.931e-127	UP
IBSP	81.9245	7.49045	0.310816	24.0993	2.54337e-128	3.97338e-127	UP
THSD4	10752.1	4.31133	0.178946	24.0929	2.96586e-128	4.63126e-127	UP
AIF1L	4514.48	2.97057	0.123382	24.0761	4.44655e-128	6.94015e-127	UP
GLRA4	5.76566	-5.65247	0.234797	-24.0738	4.70251e-128	7.3328e-127	DOWN
ACOT4	214.254	2.88131	0.119687	24.0738	4.70832e-128	7.33843e-127	UP
MSLNL	60.4327	6.52484	0.271172	24.0616	6.30887e-128	9.82848e-127	UP
RP11-437B10.1	55.4205	-2.55341	0.106138	-24.0575	6.9688e-128	1.08515e-126	DOWN
CCDC64	656.884	3.29875	0.137128	24.056	7.21674e-128	1.12324e-126	UP
IGF2BP3	709.713	6.95843	0.289302	24.0524	7.87059e-128	1.22386e-126	UP
RP11-89K21.1	366.481	9.75098	0.405547	24.044	9.64065e-128	1.4984e-126	UP
CTB-31O20.6	9.95159	-7.92364	0.329548	-24.044	9.64725e-128	1.49873e-126	DOWN
CA8	674.595	4.79325	0.199443	24.0332	1.25041e-127	1.94165e-126	UP
TUB	1114	-2.93361	0.122122	-24.022	1.63956e-127	2.54357e-126	DOWN
S100A5	88.9656	6.88654	0.286851	24.0074	2.32883e-127	3.60618e-126	UP
RP11-677I18.3	7.09115	-3.53113	0.147114	-24.0027	2.60764e-127	4.03605e-126	DOWN
RNF208	826.004	2.5913	0.107981	23.9978	2.9348e-127	4.53611e-126	UP
C7	22996.5	-5.72445	0.238551	-23.9968	3.00579e-127	4.64368e-126	DOWN
CENPW	826.784	3.85095	0.160488	23.9952	3.12292e-127	4.8224e-126	UP
SYNPO2	2172.47	-3.64954	0.152159	-23.9851	3.98094e-127	6.14168e-126	DOWN
AC114271.2	199.053	2.6295	0.109687	23.9727	5.35451e-127	8.24935e-126	UP
RP11-203J24.9	133.274	-3.19928	0.133461	-23.9716	5.50811e-127	8.47818e-126	DOWN
ALPPL2	723.738	8.22186	0.343009	23.9698	5.7429e-127	8.8355e-126	UP
ACY3	171.888	5.81119	0.242492	23.9645	6.52687e-127	1.00324e-125	UP
NINJ2	339.164	3.78882	0.15811	23.9633	6.72108e-127	1.03262e-125	UP
NUS1P2	174.967	5.16648	0.215607	23.9625	6.84258e-127	1.0508e-125	UP
LDLRAD1	289.529	6.0618	0.253123	23.948	9.68615e-127	1.48611e-125	UP
RP11-54H7.4	619.698	7.42723	0.310281	23.9371	1.25873e-126	1.92946e-125	UP
MUC15	241.662	6.47958	0.270885	23.9201	1.89392e-126	2.90045e-125	UP
SHE	258.222	-2.71442	0.113502	-23.9152	2.1262e-126	3.25319e-125	DOWN
SLC16A13	175.238	2.51964	0.105398	23.9059	2.66214e-126	4.06761e-125	UP
UBASH3B	377.09	3.03694	0.12705	23.9035	2.81525e-126	4.29959e-125	UP
TYRO3	2451.37	-3.0726	0.128564	-23.8994	3.10641e-126	4.74211e-125	DOWN
DNM3OS	537.588	-3.59879	0.150592	-23.8976	3.24356e-126	4.9447e-125	DOWN
LINC00475	18.726	-3.67162	0.153646	-23.8966	3.32065e-126	5.0599e-125	DOWN
SST	4463.68	7.135	0.298662	23.8899	3.89859e-126	5.93243e-125	UP
ERICH6B	8.285	-3.19114	0.133613	-23.8835	4.54833e-126	6.91798e-125	DOWN
FOXP3	140.996	3.20701	0.13428	23.883	4.5976e-126	6.98973e-125	UP
LINC01101	75.344	6.87683	0.28794	23.8828	4.62106e-126	7.02221e-125	UP
ARHGAP11B	365.998	2.56438	0.107493	23.8562	8.73933e-126	1.32442e-124	UP
ITGB8	7057.24	2.83809	0.118997	23.85	1.01213e-125	1.53178e-124	UP
RP11-234B24.6	181.385	2.65394	0.111313	23.8422	1.21947e-125	1.84389e-124	UP
USP6	193.38	-3.41576	0.143305	-23.8356	1.42972e-125	2.16082e-124	DOWN
PCSK1N	1705.97	5.10563	0.214208	23.8349	1.45199e-125	2.19348e-124	UP
PRR5-ARHGAP8	72.5927	3.40264	0.14276	23.8346	1.46137e-125	2.20666e-124	UP
BBOX1-AS1	104.242	6.85073	0.287433	23.8342	1.47786e-125	2.23055e-124	UP
DDIT4	11282.3	-3.31341	0.139094	-23.8214	2.00405e-125	3.02063e-124	DOWN
CCDC69	931.283	-2.65098	0.111288	-23.8209	2.02774e-125	3.05496e-124	DOWN
TMEM63C	310.388	3.65889	0.153607	23.8197	2.08614e-125	3.14153e-124	UP
SNCAIP	592.448	-3.66809	0.154036	-23.8132	2.43881e-125	3.67097e-124	DOWN
GMNC	660.924	6.45431	0.271069	23.8105	2.59737e-125	3.90612e-124	UP
MMP1	324.789	7.16497	0.300932	23.8093	2.67709e-125	4.02418e-124	UP
LINC00313	26.3013	-4.5741	0.192119	-23.8087	2.7144e-125	4.07844e-124	DOWN
RP11-93K22.13	47.2931	6.26927	0.263362	23.8048	2.98212e-125	4.47667e-124	UP
CTD-2231H16.1	85.2881	3.85249	0.161906	23.7946	3.79639e-125	5.69135e-124	UP
ADGRG4	32.5704	-8.47057	0.356125	-23.7854	4.7334e-125	7.0897e-124	DOWN
DIRAS3	572.53	-3.75909	0.158064	-23.7821	5.11618e-125	7.65616e-124	DOWN
LINC-PINT	710.106	-2.73484	0.115035	-23.774	6.20688e-125	9.28004e-124	DOWN
SCEL	373.116	4.87554	0.205285	23.7501	1.09516e-124	1.63374e-123	UP
ZNF724P	92.5132	3.08831	0.130073	23.7429	1.29946e-124	1.93765e-123	UP
OAS1	3469.53	3.26288	0.137455	23.7377	1.47131e-124	2.18999e-123	UP
AC004623.3	83.5169	-3.26645	0.137654	-23.7294	1.7944e-124	2.66851e-123	DOWN
PDCL3P4	39.8028	-2.98863	0.12602	-23.7155	2.49436e-124	3.7045e-123	DOWN
RP11-585P4.6	12.4076	-3.09516	0.130531	-23.7121	2.70523e-124	4.01588e-123	DOWN
ANGPT4	134.413	-5.16865	0.217993	-23.7101	2.83365e-124	4.20466e-123	DOWN
HRK	170.698	5.45099	0.230033	23.6965	3.915e-124	5.80661e-123	UP
OAS3	6253.44	3.14101	0.132589	23.6899	4.5835e-124	6.7951e-123	UP
DHFRP1	105.176	3.86879	0.163335	23.6862	5.00293e-124	7.41361e-123	UP
PDE2A	341.859	-2.91444	0.123071	-23.681	5.66173e-124	8.37499e-123	DOWN
PDE6G	146.252	5.76561	0.243536	23.6745	6.60105e-124	9.75583e-123	UP
AC000078.5	11.6002	-3.58307	0.151358	-23.6729	6.86168e-124	1.01321e-122	DOWN
KCNJ11	182.791	2.95108	0.124749	23.6561	1.02134e-123	1.50613e-122	UP
KRT81	156.843	6.71333	0.283806	23.6546	1.05741e-123	1.55863e-122	UP
MCCC1-AS1	31.1733	-2.71254	0.114693	-23.6503	1.17067e-123	1.72481e-122	DOWN
TRPV6	208.17	3.405	0.14399	23.6474	1.25434e-123	1.84728e-122	UP
GABRP	554.92	5.25799	0.22238	23.6442	1.35454e-123	1.99308e-122	UP
RP3-439F8.1	54.614	3.86887	0.163702	23.6335	1.7427e-123	2.56197e-122	UP
RP11-349F21.5	9.36565	-6.09287	0.257923	-23.6228	2.24646e-123	3.29965e-122	DOWN
AF131216.6	15.1408	-2.77311	0.117398	-23.6215	2.31745e-123	3.40243e-122	DOWN
RP11-429J17.7	36.9939	6.17588	0.261505	23.6167	2.59434e-123	3.80561e-122	UP
TXLNB	230.683	-3.43133	0.145307	-23.6144	2.74154e-123	4.01976e-122	DOWN
RN7SK	13794.2	5.30725	0.224859	23.6026	3.62525e-123	5.3085e-122	UP
ENTPD2	791.966	3.83426	0.162482	23.598	4.0386e-123	5.9086e-122	UP
AADAC	168.887	4.89338	0.207378	23.5964	4.19745e-123	6.13831e-122	UP
RP11-489G11.3	2.81229	-4.47527	0.18967	-23.595	4.33584e-123	6.33792e-122	DOWN
PRKCQ	521.945	2.79799	0.118598	23.5922	4.63112e-123	6.76658e-122	UP
RP1-80N2.3	106.163	3.48212	0.14762	23.5884	5.06964e-123	7.40083e-122	UP
C6orf3	112.659	-2.72713	0.115618	-23.5874	5.19228e-123	7.57655e-122	DOWN
RP1-292L20.3	18.6872	-2.70077	0.114521	-23.5831	5.74531e-123	8.37621e-122	DOWN
CLDN11	1934.6	-3.60546	0.152909	-23.5791	6.3171e-123	9.20582e-122	DOWN
AC007389.3	127.045	7.92662	0.33618	23.5785	6.40682e-123	9.3325e-122	UP
RP11-872J21.3	66.5258	3.05241	0.129514	23.5683	8.15557e-123	1.18643e-121	UP
RP4-530I15.9	36.4322	-2.98636	0.126745	-23.5621	9.44044e-123	1.37155e-121	DOWN
NEURL3	56.1299	4.41956	0.187591	23.5596	1.0014e-122	1.45424e-121	UP
CEP126	395.209	-3.07829	0.130712	-23.5502	1.25054e-122	1.81527e-121	DOWN
CTD-3010D24.3	26.5924	6.26055	0.266021	23.5341	1.828e-122	2.65119e-121	UP
RP4-758J24.6	44.4605	-2.56546	0.109014	-23.5333	1.86069e-122	2.69743e-121	DOWN
PDE1C	150.617	-4.20977	0.178922	-23.5286	2.08105e-122	3.01557e-121	DOWN
KIF26B	930.625	4.0462	0.171996	23.5249	2.26772e-122	3.28324e-121	UP
RP11-373E16.3	2.56733	-5.26641	0.224118	-23.4983	4.24096e-122	6.12949e-121	DOWN
ITGA10	181.035	-3.11821	0.132798	-23.4808	6.405e-122	9.24518e-121	DOWN
LINC01508	68.8206	6.51459	0.277453	23.48	6.52941e-122	9.41662e-121	UP
GABBR1	2831.86	-3.49025	0.148786	-23.4581	1.09164e-121	1.57095e-120	DOWN
OR52N4	10.0714	-4.41471	0.188233	-23.4534	1.21954e-121	1.75275e-120	DOWN
CTD-2267D19.1	22.956	-2.91174	0.124184	-23.4471	1.41598e-121	2.0342e-120	DOWN
RP11-1038A11.3	109.456	6.22997	0.265704	23.447	1.41868e-121	2.0372e-120	UP
FOXL2NB	1262.71	-6.44901	0.275081	-23.4441	1.51886e-121	2.18012e-120	DOWN
PARM1	908.447	-3.08205	0.131467	-23.4435	1.53968e-121	2.20905e-120	DOWN
RP11-49C9.2	26.9659	-3.99482	0.170499	-23.4301	2.10736e-121	3.02094e-120	DOWN
SMC1B	108.241	4.9853	0.212984	23.407	3.62781e-121	5.19385e-120	UP
ADRB3	219.995	-6.65366	0.284338	-23.4005	4.22382e-121	6.04456e-120	DOWN
PLD1	889.433	-2.62979	0.112458	-23.3847	6.1123e-121	8.73586e-120	DOWN
RP11-32B5.1	35.3733	-3.70367	0.158384	-23.3841	6.20115e-121	8.85527e-120	DOWN
PPAP2C	1515.67	3.63279	0.15536	23.3831	6.35077e-121	9.06505e-120	UP
RP13-516M14.1	170.26	-2.67934	0.114605	-23.3788	7.01698e-121	1.00117e-119	DOWN
REC8	4500.13	3.25098	0.139058	23.3786	7.05852e-121	1.00667e-119	UP
RP11-170N16.3	18.2712	-3.12421	0.133656	-23.3751	7.65602e-121	1.09095e-119	DOWN
LVRN	49.2524	-4.35318	0.186244	-23.3735	7.9503e-121	1.13192e-119	DOWN
CTD-2114J12.1	50.7109	6.56715	0.281049	23.3666	9.34714e-121	1.32853e-119	UP
THEMIS2	2393.9	3.16065	0.13532	23.3569	1.17386e-120	1.6663e-119	UP
BOLA2	505.38	2.9635	0.126908	23.3515	1.33118e-120	1.88802e-119	UP
TTN	336.788	-2.70657	0.115915	-23.3495	1.39299e-120	1.97484e-119	DOWN
CTNNA2	307.377	5.18017	0.221871	23.3476	1.45651e-120	2.06402e-119	UP
CT45A3	140.587	12.8199	0.549124	23.3461	1.51155e-120	2.14111e-119	UP
PDE1B	581.664	-2.94651	0.126233	-23.3418	1.67052e-120	2.36528e-119	DOWN
FTOP1	11.1419	-3.24259	0.138925	-23.3407	1.71386e-120	2.42562e-119	DOWN
CACTIN-AS1	28.3096	-2.54578	0.109086	-23.3375	1.84791e-120	2.61424e-119	DOWN
C8orf46	81.9158	-3.07914	0.131967	-23.3326	2.07104e-120	2.92617e-119	DOWN
RNF183	277.961	4.01728	0.172249	23.3225	2.61918e-120	3.69907e-119	UP
LINC00598	5.19344	-3.46229	0.148453	-23.3224	2.62635e-120	3.70763e-119	DOWN
RP11-657O9.1	59.3433	6.99198	0.299839	23.3191	2.83729e-120	4.00374e-119	UP
LINC01215	109.436	6.25166	0.26811	23.3175	2.94621e-120	4.15567e-119	UP
TMEM240	87.2199	-2.76879	0.118744	-23.3173	2.96268e-120	4.17714e-119	DOWN
SIAH3	195.194	5.37132	0.230414	23.3117	3.37563e-120	4.75334e-119	UP
PI4KAP1	1172.46	-3.2072	0.137642	-23.3011	4.32134e-120	6.07735e-119	DOWN
CDH23	2304.23	-3.64026	0.156234	-23.3	4.43176e-120	6.23002e-119	DOWN
AGR2	514.805	5.827	0.250137	23.2952	4.95406e-120	6.95838e-119	UP
AC005519.4	123.625	-2.65351	0.11394	-23.2886	5.78483e-120	8.11845e-119	DOWN
AC026150.8	30.8768	-2.51928	0.108192	-23.2852	6.26222e-120	8.78104e-119	DOWN
RNVU1-7	900.032	8.83567	0.379562	23.2786	7.30413e-120	1.02292e-118	UP
CKS1BP3	91.5933	7.05987	0.303297	23.2771	7.56575e-120	1.05911e-118	UP
CCL20	352.075	5.89125	0.253171	23.2698	8.96602e-120	1.2546e-118	UP
THRSP	182.269	6.28972	0.270342	23.2658	9.84356e-120	1.37567e-118	UP
PLXDC1	1092.61	-2.8747	0.123607	-23.2568	1.21387e-119	1.69289e-118	DOWN
ADCY10P1	166.067	-3.52166	0.151443	-23.2539	1.29767e-119	1.809e-118	DOWN
FAM167A	225.993	4.4201	0.190126	23.2483	1.48059e-119	2.06313e-118	UP
RP11-326C3.2	549.585	4.86914	0.209503	23.2414	1.73833e-119	2.41623e-118	UP
F12	146.918	4.71456	0.202879	23.2384	1.86581e-119	2.59126e-118	UP
ZNF296	219.322	2.61899	0.112724	23.2337	2.08056e-119	2.88712e-118	UP
MAF	2507.25	-2.66362	0.114648	-23.233	2.11371e-119	2.93189e-118	DOWN
RP11-359K18.4	7.46602	-3.83164	0.16493	-23.232	2.16373e-119	3.00003e-118	DOWN
RHOB	11598.1	-2.51504	0.108304	-23.222	2.72907e-119	3.77917e-118	DOWN
HLA-DPA1	14069.9	3.65346	0.157339	23.2203	2.84108e-119	3.93265e-118	UP
MMP12	177.807	8.41194	0.362295	23.2184	2.96515e-119	4.10269e-118	UP
SHISA9	383.675	5.18929	0.223521	23.2161	3.134e-119	4.33452e-118	UP
CTD-2325P2.4	55.398	6.39907	0.275671	23.2127	3.38699e-119	4.68054e-118	UP
VIP	8.06848	-3.94825	0.170169	-23.2019	4.35543e-119	6.01139e-118	DOWN
RAC3	770.433	2.82216	0.121683	23.1926	5.40894e-119	7.45621e-118	UP
SKINTL	9.26921	-4.40835	0.190077	-23.1925	5.42584e-119	7.47643e-118	DOWN
RP11-293M10.6	67.447	2.63221	0.113522	23.1868	6.18762e-119	8.51907e-118	UP
PTGER1	201.201	5.48001	0.236346	23.1864	6.24818e-119	8.59891e-118	UP
RP11-783K16.5	56.4083	5.06755	0.21858	23.184	6.60469e-119	9.08205e-118	UP
C10orf10	5946.66	-3.17217	0.136826	-23.1839	6.61441e-119	9.09169e-118	DOWN
TMEM61	127.564	4.48431	0.193429	23.1832	6.72677e-119	9.24232e-118	UP
AC003104.1	5.24122	-3.76456	0.162417	-23.1783	7.5318e-119	1.03399e-117	DOWN
GATM	1803.31	-3.2552	0.140591	-23.1537	1.33504e-118	1.82678e-117	DOWN
RP11-70D24.3	4.64632	-4.84346	0.209244	-23.1474	1.5431e-118	2.10802e-117	DOWN
C19orf73	50.7633	3.47549	0.150176	23.1428	1.71795e-118	2.34497e-117	UP
SNORA73B	632.655	5.88025	0.25419	23.1333	2.13968e-118	2.91704e-117	UP
SALL4	277.172	4.17157	0.180332	23.1328	2.16789e-118	2.9543e-117	UP
HMGN1P18	3.5108	-5.41144	0.233963	-23.1294	2.34203e-118	3.1864e-117	DOWN
CCL8	189.32	4.32833	0.187162	23.1261	2.53073e-118	3.44173e-117	UP
ZEB2-AS1	13.0379	-3.1419	0.135869	-23.1244	2.63126e-118	3.57699e-117	DOWN
RP4-545K15.5	6.96089	-2.80566	0.121341	-23.1222	2.77223e-118	3.7671e-117	DOWN
C2orf88	3331.63	4.2821	0.185299	23.1092	3.7448e-118	5.08249e-117	UP
NPM1P26	7.59984	-3.01532	0.130514	-23.1034	4.27564e-118	5.79353e-117	DOWN
HAGLR	2854.97	3.72046	0.16108	23.097	4.96385e-118	6.72062e-117	UP
CEBPA	856.736	3.22494	0.139631	23.0962	5.05873e-118	6.8463e-117	UP
HAAO	229.995	-2.50021	0.108262	-23.094	5.31837e-118	7.19186e-117	DOWN
RP11-972P1.7	108.638	-2.6186	0.113395	-23.0927	5.47663e-118	7.39987e-117	DOWN
CD48	452.101	3.63126	0.157263	23.0903	5.79766e-118	7.82731e-117	UP
ATP1B3-AS1	10.1644	-4.98218	0.215874	-23.0791	7.50144e-118	1.01194e-116	DOWN
AMY1C	678.183	7.67898	0.332818	23.0726	8.72242e-118	1.17522e-116	UP
RP11-97O12.5	181.169	3.54047	0.153476	23.0685	9.58353e-118	1.29072e-116	UP
LEF1	1474.92	3.40186	0.147471	23.0681	9.69262e-118	1.30489e-116	UP
TCF7	997.996	2.65598	0.11515	23.0654	1.02987e-117	1.38593e-116	UP
ATP10B	300.417	5.02686	0.217985	23.0606	1.15113e-117	1.54787e-116	UP
SLC25A3P1	143.867	7.90901	0.342974	23.0601	1.165e-117	1.56588e-116	UP
MAGIX	476.357	2.93595	0.127378	23.0491	1.50256e-117	2.01798e-116	UP
EFNA3	631.922	2.76531	0.119983	23.0476	1.55629e-117	2.0893e-116	UP
INMT	388.395	-3.9553	0.171628	-23.0458	1.62198e-117	2.17573e-116	DOWN
RASGRP1	252.093	3.01301	0.130743	23.0453	1.64076e-117	2.20004e-116	UP
LL22NC03-N95F10.1	88.7474	7.93395	0.344353	23.0402	1.84465e-117	2.47243e-116	UP
ERRFI1	4252.05	-2.65813	0.115385	-23.037	1.98628e-117	2.66121e-116	DOWN
SLC6A11	195.752	5.25008	0.227927	23.0341	2.12488e-117	2.84462e-116	UP
XXbac-B444P24.13	10.6972	-2.54865	0.110673	-23.0286	2.41167e-117	3.22726e-116	DOWN
BNC2	2075	-2.95645	0.128425	-23.0208	2.88484e-117	3.85889e-116	DOWN
AMY1B	806.279	8.35295	0.36286	23.0198	2.95551e-117	3.95185e-116	UP
TLR7	197.774	3.79363	0.164809	23.0183	3.05909e-117	4.08871e-116	UP
RP11-68L18.1	14.2809	-3.27052	0.142088	-23.0176	3.10883e-117	4.15353e-116	DOWN
TMSB4XP4	289.773	3.22579	0.140201	23.0083	3.84677e-117	5.13533e-116	UP
CDK15	137.294	-4.14854	0.180394	-22.9971	4.9825e-117	6.64884e-116	DOWN
PPP4R4	143.635	-4.07464	0.177335	-22.9771	7.89744e-117	1.0526e-115	DOWN
RP11-713M15.2	72.3981	3.93681	0.171345	22.976	8.1091e-117	1.08038e-115	UP
SLC26A9	204.786	5.19465	0.226096	22.9755	8.20321e-117	1.09249e-115	UP
RP11-95H3.1	21.0762	-5.61069	0.244309	-22.9656	1.02971e-116	1.36862e-115	DOWN
RP11-426C22.8	11.0868	-4.22742	0.184091	-22.9638	1.07264e-116	1.42511e-115	DOWN
CCDC144B	124.79	-4.07345	0.177443	-22.9564	1.27299e-116	1.68995e-115	DOWN
CXCL9	1441.5	5.61867	0.244761	22.9558	1.29083e-116	1.71296e-115	UP
ZNF781	89.0184	-3.06745	0.13363	-22.9548	1.32034e-116	1.75072e-115	DOWN
KCNMB2-AS1	138.194	7.5885	0.330672	22.9487	1.51814e-116	2.0122e-115	UP
NDNF	377.399	-4.38593	0.191145	-22.9456	1.6313e-116	2.16133e-115	DOWN
AC012531.25	50.7776	-4.8018	0.209285	-22.9438	1.69913e-116	2.2503e-115	DOWN
SNHG24	24.0674	-6.30695	0.274936	-22.9397	1.86741e-116	2.47219e-115	DOWN
RP11-3J1.1	18.4248	5.82917	0.25415	22.9359	2.03548e-116	2.69256e-115	UP
MIR497HG	205.61	-2.96061	0.12909	-22.9345	2.10491e-116	2.7822e-115	DOWN
DUXAP8	1427.16	3.71094	0.16182	22.9326	2.19923e-116	2.90571e-115	UP
ALDH1A1	2554.53	-3.25966	0.142142	-22.9323	2.21071e-116	2.91973e-115	DOWN
CTC-548K16.1	59.7196	7.16508	0.312538	22.9255	2.58878e-116	3.41501e-115	UP
RPS2P32	120.773	3.52158	0.15366	22.9181	3.06915e-116	4.04548e-115	UP
TAL1	56.2669	-2.89764	0.126454	-22.9146	3.32352e-116	4.37905e-115	DOWN
HIGD1AP11	5.37884	-5.1971	0.226843	-22.9106	3.64418e-116	4.79965e-115	DOWN
CCND1	7143.75	3.51754	0.153547	22.9085	3.81976e-116	5.02892e-115	UP
AC015971.2	19.5086	-3.37486	0.147539	-22.8744	8.36483e-116	1.09911e-114	DOWN
MESP2	73.8255	5.27218	0.230545	22.8684	9.59864e-116	1.26024e-114	UP
SYPL2	87.2847	-3.57687	0.156432	-22.8653	1.0291e-115	1.35007e-114	DOWN
RP11-13K12.2	48.4578	6.5015	0.284371	22.8627	1.09181e-115	1.43179e-114	UP
CAMK2N2	104.429	4.72386	0.206631	22.8613	1.12879e-115	1.47911e-114	UP
LINC00926	76.7267	-2.702	0.118192	-22.8611	1.13398e-115	1.48533e-114	DOWN
LINC00506	38.0521	-3.44838	0.150968	-22.8418	1.76165e-115	2.30296e-114	DOWN
RP11-361L15.5	90.0806	-4.06154	0.177812	-22.8417	1.76532e-115	2.30686e-114	DOWN
TMEM51-AS1	275.423	-2.6758	0.117149	-22.8409	1.79882e-115	2.34972e-114	DOWN
FCER1G	2841.1	3.20917	0.140503	22.8405	1.81462e-115	2.36944e-114	UP
MIR205HG	405.241	6.65859	0.291599	22.8348	2.0712e-115	2.70341e-114	UP
TBX3	1637.39	-3.79988	0.166449	-22.8291	2.35762e-115	3.07485e-114	DOWN
IL32	4834.11	3.43522	0.150501	22.8253	2.57255e-115	3.35385e-114	UP
RP11-244M2.1	70.7537	4.39369	0.192509	22.8233	2.68967e-115	3.50517e-114	UP
PABPC5	90.1518	-3.53712	0.154993	-22.8211	2.82893e-115	3.68522e-114	DOWN
RP11-243M5.5	4.91693	-5.86636	0.257127	-22.815	3.25351e-115	4.23336e-114	DOWN
CTD-2224J9.8	8.65734	-3.37869	0.148138	-22.8077	3.84512e-115	4.99731e-114	DOWN
GOLGA6L3	21.6805	-5.42134	0.237787	-22.7992	4.6735e-115	6.06918e-114	DOWN
ADGRD1	608.793	-4.24584	0.186248	-22.7967	4.94105e-115	6.41414e-114	DOWN
VIPR2	304.825	-4.32294	0.189635	-22.7961	5.01391e-115	6.50619e-114	DOWN
PPP1R14BP3	136.81	2.64674	0.11615	22.7872	6.14474e-115	7.9705e-114	UP
RBPMS	4196.4	-2.71306	0.119102	-22.7794	7.34305e-115	9.51747e-114	DOWN
RP11-395N3.2	11.4603	-3.10444	0.136301	-22.7764	7.86002e-115	1.01836e-113	DOWN
ANO4	113.36	-4.64949	0.204225	-22.7665	9.85923e-115	1.27688e-113	DOWN
KB-1572G7.3	8.44158	-4.18565	0.183881	-22.7629	1.0695e-114	1.38459e-113	DOWN
FBN3	1119.66	5.28305	0.232206	22.7516	1.38405e-114	1.78903e-113	UP
SMAD9	377.735	-2.70783	0.119041	-22.7471	1.53137e-114	1.9787e-113	DOWN
OSBP2	678.442	2.60069	0.114341	22.745	1.60812e-114	2.07707e-113	UP
RP11-357H14.16	62.6541	6.61003	0.290707	22.7378	1.89555e-114	2.44548e-113	UP
KIF1A	4655.19	4.75405	0.209083	22.7377	1.90122e-114	2.45183e-113	UP
RP11-333E1.2	21.1678	-2.84553	0.125217	-22.7247	2.55337e-114	3.28779e-113	DOWN
HLA-DRB1	11808.8	3.51091	0.154507	22.7233	2.63773e-114	3.3951e-113	UP
RP11-69E11.4	249.319	-2.7634	0.121624	-22.7209	2.7841e-114	3.58212e-113	DOWN
RP11-360L9.7	71.265	3.17865	0.139909	22.7195	2.87584e-114	3.6973e-113	UP
ARHGAP40	94.7378	5.5848	0.245882	22.7133	3.30829e-114	4.25e-113	UP
ADAMTS14	395.241	3.977	0.175123	22.7098	3.58718e-114	4.60651e-113	UP
CYP4F11	458.983	4.34526	0.191353	22.708	3.7316e-114	4.79013e-113	UP
KAAG1	68.4977	5.60375	0.246789	22.7066	3.85379e-114	4.94128e-113	UP
TSACC	63.5742	3.92801	0.173143	22.6865	6.08841e-114	7.78557e-113	UP
KIAA1161	1449.47	2.99087	0.131838	22.6859	6.17748e-114	7.89644e-113	UP
TM4SF1	16401.4	2.70009	0.119024	22.6853	6.25877e-114	7.9973e-113	UP
RP11-60L3.1	82.8843	6.0465	0.266672	22.6739	8.10477e-114	1.03481e-112	UP
RANP4	21.7438	-3.20261	0.141293	-22.6664	9.60923e-114	1.22597e-112	DOWN
CFH	5483.76	-3.2354	0.142826	-22.6528	1.3082e-113	1.66712e-112	DOWN
GDPD2	160.836	5.5214	0.243759	22.651	1.36255e-113	1.73505e-112	UP
CELF6	370.219	-3.43281	0.151554	-22.6507	1.3738e-113	1.74872e-112	DOWN
GOLGA8Q	23.4796	-4.53643	0.200352	-22.6423	1.66074e-113	2.11155e-112	DOWN
SYNM	670.934	-3.2584	0.143914	-22.6413	1.69819e-113	2.15834e-112	DOWN
GS1-114I9.1	130.241	-2.55525	0.112884	-22.6361	1.91069e-113	2.42566e-112	DOWN
RPLP0P2	91.2106	4.25539	0.188017	22.633	2.05182e-113	2.60284e-112	UP
ALDH3B1	2034.69	2.68722	0.118768	22.6258	2.41329e-113	3.0579e-112	UP
MRGPRF	777.519	-2.87113	0.12692	-22.6216	2.6564e-113	3.36339e-112	DOWN
THPO	34.3507	-3.62139	0.160101	-22.6194	2.79469e-113	3.53582e-112	DOWN
PROK1	1556.38	-6.72362	0.297507	-22.5999	4.34769e-113	5.48818e-112	DOWN
MICU3	274.539	-2.83531	0.125487	-22.5945	4.91106e-113	6.18997e-112	DOWN
CHRM3-AS2	22.3079	-4.30467	0.190565	-22.589	5.55302e-113	6.99383e-112	DOWN
ANKRD10-IT1	129.037	-2.67724	0.118527	-22.5876	5.74309e-113	7.23049e-112	DOWN
RP11-762L8.6	70.0738	-2.89844	0.128364	-22.5798	6.8514e-113	8.62259e-112	DOWN
MTRNR2L4	8.52748	-3.78299	0.167568	-22.5758	7.4928e-113	9.42625e-112	DOWN
SLC12A5	325.519	3.68896	0.163406	22.5754	7.56834e-113	9.5177e-112	UP
RP11-106M3.2	196.112	-3.32714	0.147404	-22.5716	8.24006e-113	1.03585e-111	DOWN
MXRA5	7946.53	3.17366	0.140837	22.5343	1.91403e-112	2.398e-111	UP
MYH1	13.322	-6.83707	0.303568	-22.5223	2.50891e-112	3.13858e-111	DOWN
AC093642.3	56.926	-3.3812	0.15015	-22.5188	2.71606e-112	3.39644e-111	DOWN
CHAC1	443.472	3.25352	0.144499	22.5159	2.90239e-112	3.6281e-111	UP
TYMSOS	76.3969	4.09176	0.181862	22.4992	4.22446e-112	5.27481e-111	UP
FOXN1	71.9115	5.50042	0.244597	22.4877	5.47669e-112	6.83328e-111	UP
CEBPB-AS1	116.155	-2.7324	0.121517	-22.4858	5.72091e-112	7.13533e-111	DOWN
ENHO	219.72	3.91705	0.174347	22.4669	8.74982e-112	1.09009e-110	UP
FAM124A	737.32	2.96379	0.131918	22.4669	8.7564e-112	1.0905e-110	UP
HMGA2	2089.69	5.25198	0.233775	22.466	8.93505e-112	1.11234e-110	UP
LRP8	1149.09	2.57861	0.114793	22.4631	9.53618e-112	1.18629e-110	UP
RP1-78O14.1	114.387	-3.64716	0.162473	-22.4478	1.34423e-111	1.67157e-110	DOWN
MAOB	2479.41	-3.49389	0.155697	-22.4403	1.59105e-111	1.97557e-110	DOWN
CXCR3	119.635	4.45127	0.198365	22.4398	1.61017e-111	1.99856e-110	UP
NBEA	397.414	-3.1383	0.139862	-22.4385	1.65701e-111	2.05517e-110	DOWN
RP1-172N19.5	69.2978	-3.86016	0.172072	-22.4334	1.85869e-111	2.30446e-110	DOWN
LINC01094	110.36	3.21949	0.14356	22.4261	2.19e-111	2.71221e-110	UP
FRAS1	1076.77	3.31021	0.147674	22.4157	2.76675e-111	3.42014e-110	UP
HIST2H3A	74.6394	3.75854	0.167706	22.4115	3.04142e-111	3.7569e-110	UP
HIST2H3C	74.6394	3.75854	0.167706	22.4115	3.04142e-111	3.7569e-110	UP
COL9A1	445.844	6.37967	0.284672	22.4106	3.10093e-111	3.82899e-110	UP
LHX1	1220.33	7.90371	0.352953	22.3931	4.59637e-111	5.66716e-110	UP
DIO3	217.23	-4.88179	0.218038	-22.3896	4.97068e-111	6.12641e-110	DOWN
CELF2	1728.48	-2.6915	0.120223	-22.3876	5.19871e-111	6.40509e-110	DOWN
RP11-446H18.6	11.6136	-4.14325	0.185102	-22.3836	5.6826e-111	6.99869e-110	DOWN
CRTAC1	1855.28	4.99826	0.223357	22.3779	6.46002e-111	7.95323e-110	UP
NRN1L	22.4939	-2.85853	0.127787	-22.3695	7.80555e-111	9.59563e-110	DOWN
PDGFRB	6124.59	-2.86179	0.127948	-22.3669	8.27437e-111	1.01682e-109	DOWN
RP11-465B22.3	97.0447	3.83514	0.171485	22.3642	8.7765e-111	1.07813e-109	UP
SORD2P	496.377	2.84511	0.127218	22.364	8.81956e-111	1.08302e-109	UP
PLD4	314.344	3.8104	0.170425	22.3582	1.00402e-110	1.2302e-109	UP
SPON1	38669.4	3.49578	0.156426	22.3477	1.27026e-110	1.55527e-109	UP
MCOLN2	148.208	2.85388	0.127772	22.3357	1.66401e-110	2.03588e-109	UP
LINC00844	9.74931	-6.63653	0.297164	-22.3329	1.77163e-110	2.16676e-109	DOWN
ADAM33	1925.39	-4.26919	0.191309	-22.3157	2.60241e-110	3.17818e-109	DOWN
PRSS33	635.146	8.17003	0.366132	22.3144	2.67559e-110	3.26635e-109	UP
RP11-384L8.1	69.8935	3.08061	0.138064	22.3129	2.77076e-110	3.3813e-109	UP
CTSS	2611.72	2.917	0.130736	22.3121	2.81704e-110	3.43526e-109	UP
ADAMDEC1	228.737	5.56446	0.249512	22.3013	3.5861e-110	4.36832e-109	UP
SMOC2	3109.3	-3.05585	0.137059	-22.2958	4.05929e-110	4.93932e-109	DOWN
C17orf96	608.316	2.89097	0.12967	22.2948	4.14613e-110	5.04315e-109	UP
GREB1L	226.045	-3.96665	0.177927	-22.2937	4.2535e-110	5.17186e-109	DOWN
IGFBP6	1902.93	-3.51762	0.157803	-22.2913	4.49139e-110	5.45913e-109	DOWN
HLA-DPB1	7969.98	3.30331	0.148193	22.2906	4.55602e-110	5.53568e-109	UP
FUT8-AS1	131.805	3.36242	0.150867	22.2873	4.90368e-110	5.95375e-109	UP
LY86	274.696	3.10635	0.139379	22.287	4.93641e-110	5.98914e-109	UP
RP11-523O18.5	5.54916	-4.11645	0.184717	-22.2851	5.15016e-110	6.2462e-109	DOWN
PROX2	29.2499	-3.15118	0.141416	-22.283	5.3968e-110	6.54296e-109	DOWN
RP11-562A8.4	9.44083	-3.01794	0.135465	-22.2784	5.98017e-110	7.24497e-109	DOWN
SUCNR1	76.9401	4.26768	0.191628	22.2706	7.11792e-110	8.61239e-109	UP
PDZRN3-AS1	6.07777	-4.92852	0.221302	-22.2706	7.11919e-110	8.61239e-109	DOWN
MEG8	35.7921	-5.14169	0.230939	-22.2643	8.1971e-110	9.9092e-109	DOWN
SEZ6L2	3958.87	3.03061	0.136128	22.263	8.43764e-110	1.01963e-108	UP
HLA-DMB	3515.06	3.13285	0.140742	22.2595	9.13128e-110	1.10305e-108	UP
SLC6A1	88.6996	-3.28595	0.147685	-22.2498	1.13349e-109	1.36826e-108	DOWN
RP11-844P9.2	775.377	-3.7809	0.170019	-22.2381	1.4714e-109	1.77424e-108	DOWN
FLRT2	1582.82	-3.51513	0.158073	-22.2374	1.49395e-109	1.80077e-108	DOWN
ENOX1	180.993	-3.07738	0.138401	-22.2352	1.56834e-109	1.88976e-108	DOWN
MANEAL	490.076	3.21278	0.144494	22.2347	1.58696e-109	1.9115e-108	UP
EDA2R	188.769	-3.02108	0.135956	-22.221	2.15023e-109	2.58716e-108	DOWN
KCP	240.047	4.3968	0.197923	22.2147	2.47419e-109	2.97375e-108	UP
RP11-627K11.6	213.52	4.87758	0.219578	22.2134	2.54972e-109	3.06342e-108	UP
MRO	85.9458	-2.82181	0.127056	-22.2091	2.80319e-109	3.36555e-108	DOWN
IL2RB	538.667	3.77992	0.170199	22.2088	2.82517e-109	3.39071e-108	UP
AC005537.2	107.369	4.80138	0.216218	22.2062	2.99354e-109	3.5902e-108	UP
WFDC21P	102.075	4.90006	0.220715	22.2008	3.37093e-109	4.03992e-108	UP
KRT1	26.7061	-6.10657	0.275113	-22.1966	3.7075e-109	4.43851e-108	DOWN
MAGEA4	433.514	10.8587	0.489253	22.1944	3.89133e-109	4.65523e-108	UP
FSTL4	127.78	5.67347	0.255666	22.1909	4.20379e-109	5.02545e-108	UP
KLF4	1480.01	-2.98387	0.134481	-22.188	4.48042e-109	5.35231e-108	DOWN
HRC	81.1967	-3.83906	0.173035	-22.1866	4.6294e-109	5.5283e-108	DOWN
AC007405.6	162.849	2.56657	0.115687	22.1855	4.74406e-109	5.6632e-108	UP
CTC-490E21.11	55.6824	-2.72238	0.122726	-22.1825	5.0703e-109	6.04832e-108	DOWN
AMT	1019.49	-3.02267	0.136279	-22.18	5.35942e-109	6.38865e-108	DOWN
AC124789.1	124.639	4.29666	0.193733	22.1782	5.57474e-109	6.64294e-108	UP
RP11-325K4.3	16.7046	-3.133	0.141274	-22.1768	5.75823e-109	6.85182e-108	DOWN
ALMS1P	22.2984	-2.91377	0.131415	-22.1723	6.35469e-109	7.55887e-108	DOWN
TNFRSF11B	644.626	4.45572	0.200962	22.1719	6.41218e-109	7.62454e-108	UP
OR2A1	7.87963	-3.44179	0.155245	-22.17	6.69383e-109	7.95661e-108	DOWN
AC093110.3	28.4311	-3.05757	0.137936	-22.1666	7.21914e-109	8.57491e-108	DOWN
KDM5D	1.60215	-5.77264	0.260527	-22.1576	8.81453e-109	1.04513e-107	DOWN
AKAP12	6283.3	-3.1889	0.143927	-22.1564	9.05408e-109	1.07278e-107	DOWN
CTD-2651B20.4	5.0443	-5.72428	0.258432	-22.15	1.04236e-108	1.23373e-107	DOWN
ATP2A1-AS1	45.3979	4.00481	0.180857	22.1436	1.20359e-108	1.42305e-107	UP
RP11-89K11.1	42.0206	-3.54375	0.160052	-22.1412	1.26751e-108	1.4981e-107	DOWN
RP11-346E8.1	2.09257	-3.75572	0.169635	-22.14	1.30141e-108	1.53762e-107	DOWN
RBM20	180.618	-3.8041	0.171957	-22.1224	1.92623e-108	2.27183e-107	DOWN
CSPG4P11	238.359	-3.36734	0.152244	-22.118	2.12189e-108	2.49994e-107	DOWN
RASGRF2-AS1	5.178	-4.04914	0.183071	-22.1179	2.12554e-108	2.50335e-107	DOWN
AP000280.66	20.0508	-5.74236	0.259656	-22.1153	2.2535e-108	2.65032e-107	DOWN
PTPRD-AS1	72.6252	-4.53764	0.20519	-22.1143	2.30136e-108	2.70566e-107	DOWN
LEPR	876.983	-2.67413	0.120924	-22.1141	2.31168e-108	2.71683e-107	DOWN
MAP4K1	499.891	2.61465	0.118293	22.1032	2.94634e-108	3.46029e-107	UP
HAPLN1	129.072	4.53109	0.205057	22.0967	3.40274e-108	3.9935e-107	UP
ELL2	1193.79	-2.82955	0.128074	-22.0931	3.6832e-108	4.32113e-107	DOWN
SMIM24	210.142	5.25266	0.237772	22.0912	3.84122e-108	4.50493e-107	UP
RTN2	547.58	2.78766	0.126207	22.0879	4.12784e-108	4.83938e-107	UP
C10orf91	67.1456	6.28535	0.284576	22.0867	4.23879e-108	4.96771e-107	UP
MESTP1	4.51447	-4.43058	0.200608	-22.0858	4.3296e-108	5.07058e-107	DOWN
EMBP1	82.8782	3.54617	0.160569	22.0851	4.39592e-108	5.14644e-107	UP
CH507-42P11.8	3745.29	-3.37801	0.152994	-22.0794	4.98711e-108	5.83244e-107	DOWN
HIST1H2BJ	162.328	3.80663	0.172448	22.074	5.61577e-108	6.56306e-107	UP
CD164L2	112.139	4.7176	0.213752	22.0704	6.08074e-108	7.1015e-107	UP
GUCA1B	23.6318	-2.94475	0.133471	-22.0629	7.176e-108	8.37184e-107	DOWN
RIMKLA	245.792	3.91395	0.177449	22.0567	8.22971e-108	9.58439e-107	UP
CA12	1335.49	4.13962	0.18775	22.0486	9.85166e-108	1.14574e-106	UP
MEST	8675.12	3.12844	0.141913	22.0448	1.07143e-107	1.2452e-106	UP
RP11-70L8.4	34.894	-3.08043	0.1398	-22.0346	1.34363e-107	1.561e-106	DOWN
RP6-24A23.8	7.00092	-6.69985	0.304068	-22.0341	1.35859e-107	1.57783e-106	DOWN
VSTM2L	616.913	5.61804	0.255067	22.0257	1.63336e-107	1.89495e-106	UP
SYT8	214.496	6.17056	0.280176	22.0239	1.7011e-107	1.97286e-106	UP
KRT8P45	40.3799	4.70059	0.213441	22.0229	1.73802e-107	2.01498e-106	UP
CTD-3214H19.6	53.4934	4.10794	0.186534	22.0225	1.7535e-107	2.03222e-106	UP
IL2RG	811.859	3.523	0.160028	22.0149	2.07317e-107	2.40021e-106	UP
RP11-230C9.2	35.8284	-2.77684	0.126151	-22.012	2.20955e-107	2.55722e-106	DOWN
ZDBF2	748.341	-3.92841	0.178518	-22.0057	2.53825e-107	2.93661e-106	DOWN
RP11-1391J7.1	58.2259	-2.82769	0.12851	-22.0036	2.65878e-107	3.075e-106	DOWN
CDKN1A	4173.6	-2.55288	0.116029	-22.0021	2.74709e-107	3.17603e-106	DOWN
PLA2G1B	23.156	-3.7695	0.171333	-22.0009	2.82053e-107	3.25981e-106	DOWN
RP11-45M22.2	74.0659	-2.80105	0.127338	-21.9969	3.08195e-107	3.56071e-106	DOWN
MMP24	533.335	3.48918	0.158639	21.9944	3.25691e-107	3.76155e-106	UP
BLNK	234.681	2.85559	0.129846	21.992	3.43183e-107	3.96083e-106	UP
OTX1	193.834	5.63261	0.256235	21.9822	4.26346e-107	4.90878e-106	UP
HOXB3	1501.02	3.59216	0.163417	21.9816	4.31581e-107	4.96735e-106	UP
CHRNA1	132.217	6.15729	0.280169	21.9771	4.77323e-107	5.49192e-106	UP
KIF12	522.631	3.41799	0.155573	21.9703	5.53439e-107	6.36112e-106	UP
KIAA1324	1840.15	5.67013	0.258181	21.9618	6.67387e-107	7.66027e-106	UP
RP11-73M18.2	328.268	4.78138	0.217713	21.9618	6.67684e-107	7.66105e-106	UP
HIST1H2AM	32.9102	6.03883	0.274979	21.9611	6.78616e-107	7.7838e-106	UP
CH507-513H4.3	275879	3.46842	0.157987	21.9539	7.95657e-107	9.1169e-106	UP
CH507-513H4.4	275879	3.46842	0.157987	21.9539	7.95657e-107	9.1169e-106	UP
CH507-513H4.6	275879	3.46842	0.157987	21.9539	7.95657e-107	9.1169e-106	UP
TDRD5	145.22	3.95149	0.180089	21.9419	1.03541e-106	1.18559e-105	UP
RP11-173A16.1	2.57159	-3.96494	0.180781	-21.9323	1.27741e-106	1.4612e-105	DOWN
RP11-295K3.1	242.631	2.99314	0.13649	21.9294	1.36291e-106	1.55846e-105	UP
CTD-2325P2.2	2.01234	-4.62363	0.210851	-21.9284	1.39113e-106	1.59019e-105	DOWN
RGS10	2365.86	2.5216	0.115066	21.9143	1.89848e-106	2.1679e-105	UP
MCIDAS	48.3465	6.59611	0.301154	21.9028	2.44431e-106	2.78833e-105	UP
RP11-573M3.3	5.42871	-3.71607	0.169667	-21.9022	2.47669e-106	2.82431e-105	DOWN
PPAPDC3	154.514	-3.23497	0.147757	-21.8939	2.96869e-106	3.3819e-105	DOWN
DHCR24	27349.6	2.684	0.122608	21.8908	3.17607e-106	3.61568e-105	UP
DNM1P51	94.1115	-3.54476	0.161932	-21.8904	3.20382e-106	3.64603e-105	DOWN
UPK2	119.344	5.94527	0.271608	21.8892	3.29547e-106	3.74905e-105	UP
PKHD1	164.335	6.3317	0.289338	21.8834	3.73728e-106	4.24733e-105	UP
CTD-2020K17.3	97.6484	2.875	0.131402	21.8794	4.0827e-106	4.63516e-105	UP
RP11-258F1.1	9.68384	-2.82732	0.129251	-21.8746	4.53254e-106	5.14412e-105	DOWN
SDPR	704.544	-3.37777	0.154443	-21.8706	4.94602e-106	5.60958e-105	DOWN
RP11-806H10.4	69.2203	3.5594	0.162756	21.8696	5.05853e-106	5.73524e-105	UP
TMEM169	109.579	3.52557	0.161239	21.8654	5.54352e-106	6.28297e-105	UP
RP11-468N14.13	32.4841	6.18602	0.283051	21.8548	7.00524e-106	7.93429e-105	UP
RASGEF1A	583.972	3.22256	0.147463	21.8533	7.23882e-106	8.19606e-105	UP
C19orf84	68.0718	6.0473	0.276757	21.8506	7.67587e-106	8.68796e-105	UP
TUBB3	1841.1	3.52235	0.161223	21.8477	8.17973e-106	9.25198e-105	UP
TMEFF1	275.497	4.10211	0.187773	21.8461	8.4647e-106	9.56783e-105	UP
RP11-426C22.5	29.6704	-2.51097	0.114953	-21.8434	8.98093e-106	1.0141e-104	DOWN
AQP6	113.546	5.32191	0.243712	21.8369	1.03523e-105	1.16816e-104	UP
OSR2	1449.73	-3.33917	0.152946	-21.8323	1.14555e-105	1.29134e-104	DOWN
MYH7B	147.791	-2.71649	0.124436	-21.8304	1.1942e-105	1.34573e-104	DOWN
AP002954.3	16.4626	-3.27994	0.150268	-21.8273	1.27738e-105	1.4385e-104	DOWN
CTD-3193O13.12	45.7692	3.45211	0.158191	21.8224	1.42096e-105	1.59964e-104	UP
AP000692.9	12.84	-2.75666	0.126336	-21.82	1.49902e-105	1.68695e-104	DOWN
DMBX1	104.467	7.87414	0.360918	21.817	1.60131e-105	1.80146e-104	UP
MX2	2884.87	2.66479	0.122204	21.8061	2.03098e-105	2.2833e-104	UP
LL0XNC01-36H8.1	12.1091	-3.45104	0.158316	-21.7984	2.40084e-105	2.69729e-104	DOWN
FAT4	443.988	-2.71739	0.124706	-21.7905	2.85723e-105	3.20788e-104	DOWN
SPATA12	46.2221	3.49979	0.160626	21.7884	2.98678e-105	3.3522e-104	UP
THY1	8292.39	3.27205	0.150269	21.7746	4.03649e-105	4.5273e-104	UP
COL27A1	2423.69	-3.08971	0.141968	-21.7634	5.15708e-105	5.77638e-104	DOWN
CHI3L1	14331.7	4.34537	0.199665	21.7633	5.16514e-105	5.78346e-104	UP
AC114730.11	23.4528	-3.59834	0.165346	-21.7625	5.25575e-105	5.88295e-104	DOWN
KRT8P10	18.7275	5.52076	0.253698	21.7612	5.41606e-105	6.06036e-104	UP
CYP11B1	9.44168	-8.04156	0.369654	-21.7543	6.29537e-105	7.03956e-104	DOWN
ALPP	770.894	6.45215	0.296715	21.7453	7.65001e-105	8.54289e-104	UP
[truncated: 4,562 more rows]
