# Supplementary material for: Inhibition of PTK6 Hinders the Growth and Migration of Ovarian Cancer and Its Potential Clinical Significance
Source: Research Square preprint supplement (doi:10.21203/rs.3.rs-8166231/v1), 2025-12-12
Supplement: Supplementary file 3 [file fd04fc402476dded34e1cf61.xlsx]

## Sheet: GSE203130 DEG
GeneID	ctrl1_NormalizedReadsCount	ctrl2_NormalizedReadsCount	ctrl3_NormalizedReadsCount	ctrl4_NormalizedReadsCount	oc1_NormalizedReadsCount	oc2_NormalizedReadsCount	oc3_NormalizedReadsCount	oc4_NormalizedReadsCount	log2FoldChange(oc/ctrl)	Pvalue	Padj	Up/Down-Regulation(oc/ctrl)
ENPP4	43.1	22.8	11	10.1	49.4	172.5	21.8	90.9	2.04588	0.00526748	0.043124	Up
SEMA3F	123.9	70.3	29.3	56.4	1597.4	1005.9	92.8	471.4	3.52692	1.85096e-06	0.000111596	Up
CFTR	0	0.6	3.7	3	80.6	16	2.2	161.1	5.0061	7.40239e-05	0.00186619	Up
LAP3	667.7	431.7	346.6	427.1	1860.3	1407	523.2	679.3	1.2611	0.00528015	0.043205	Up
AOC1	0	0	0	1	56.5	794.8	0.5	932.1	9.74625	5.3048e-06	0.00024598	Up
DBNDD1	64.6	42.4	31.2	36.3	277.6	101.2	55.7	100.3	1.65881	0.00289488	0.0285036	Up
PLXND1	1480.9	938.1	808.6	874.4	2796.6	2248.4	1192.7	1995.2	1.01063	0.00287134	0.0283399	Up
PRSS22	0	1.3	0	0	101.7	378.5	2.7	26.1	7.62513	7.84865e-07	5.73172e-05	Up
SLC25A5	1152.4	1391.4	1426.6	1314.6	2918.4	6131.6	1373.4	2502	1.28941	0.00305832	0.0295663	Up
MEOX1	16.2	10.1	1.8	2	948.1	141.9	3.8	51.5	5.36066	1.34974e-05	0.000510244	Up
YBX2	0	1.9	1.8	1	20.6	177.6	2.2	2.7	5.12249	0.000439706	0.00734654	Up
TNFRSF12A	59.2	112.7	42.2	19.1	1503.3	807.2	204.2	633.2	3.74685	1.98477e-08	3.53612e-06	Up
BAIAP2L1	21.5	43.7	25.7	42.3	398.8	695.8	36.6	165.8	3.25152	1.5165e-05	0.000553734	Up
ETV1	16.2	9.5	9.2	8.1	60	58.2	41.5	64.9	2.54065	1.40756e-08	2.7027e-06	Up
ALDH3B1	75.4	65.8	77	63.5	536.4	866.2	111.4	548.9	2.87877	1.45731e-07	1.51123e-05	Up
TTC22	10.8	14.6	69.7	25.2	227.6	214	24.6	203.3	2.45507	0.00133553	0.0167264	Up
GGCT	102.3	96.2	100.9	86.6	251.7	307.9	105.4	154.5	1.09161	0.00566133	0.0453928	Up
SCIN	5.4	10.8	14.7	14.1	62.3	81.5	33.3	82.9	2.43396	1.87056e-06	0.000112342	Up
PROM1	5.4	3.8	7.3	3	44.7	267.9	9.3	299.5	5.05267	4.17016e-07	3.5838e-05	Up
BAIAP3	26.9	36.1	29.3	23.2	275.8	132.5	26.2	64.2	2.10111	0.00223346	0.0235216	Up
E2F2	0	0.6	1.8	0	171.7	34.2	5.5	12.7	6.23416	8.6916e-06	0.000356722	Up
CYB561	236.9	350.7	364.9	383.8	1348	3835.2	330.9	571	2.18393	0.00109792	0.0143152	Up
PLEKHG6	0	1.3	1.8	6	50.6	200.2	3.8	147.1	5.24176	4.90399e-06	0.000232566	Up
MGST1	10.8	12	5.5	10.1	42.3	215.5	8.2	76.2	3.1508	0.000387047	0.0066525	Up
CD9	759.3	346.3	487.8	323.4	3814.7	11661.3	500.8	1190.1	3.16626	6.50265e-05	0.00169428	Up
STAB1	473.9	503.2	346.6	367.7	1943.2	899.7	1387.6	2144.9	1.91659	6.92909e-09	1.64216e-06	Up
CD4	258.5	158.3	100.9	155.1	726.4	560.5	308	488.8	1.65866	1.42354e-05	0.000528477	Up
LYPLA2	328.5	412.1	405.2	391.9	1703.3	939.7	423.8	690	1.28554	0.00248028	0.0253821	Up
ABHD5	53.8	77.2	38.5	49.4	103.5	259.1	128.3	111	1.44103	0.00100424	0.0134779	Up
PLAUR	134.6	141.8	104.5	98.7	1054	104.1	317.8	310.9	1.90021	0.00212956	0.0227509	Up
TYROBP	134.6	162.7	126.5	149.1	1159.8	387.2	320	569	2.08308	2.39662e-06	0.000137968	Up
SEMA3B	533.1	561.5	469.4	554	2652	3049.8	398.6	1854.1	1.90874	0.000317654	0.00579942	Up
ALOX5	96.9	32.9	29.3	29.2	326.4	273.7	109.2	272.8	2.49719	1.35354e-06	8.66431e-05	Up
SLC25A39	570.8	722.3	744.5	686	3439.5	2261.5	685.9	1114.6	1.46015	0.00239369	0.0247073	Up
TACC3	43.1	53.2	33	49.4	1366.3	262	60.6	125	3.33902	5.78083e-05	0.00154238	Up
ACPP	10.8	9.5	5.5	14.1	124.1	396.7	34.9	12	3.82742	5.74219e-05	0.00153735	Up
WAS	32.3	36.7	11	32.2	162.9	80.8	53	69.5	1.69843	0.001629	0.0189093	Up
BID	75.4	120.3	69.7	64.5	650.5	304.3	116.9	237.4	1.97862	0.000221795	0.00439623	Up
SLC11A1	0	12.7	18.3	11.1	300	64.1	15.3	23.4	3.16556	0.00143723	0.0175479	Up
ATP1A2	904.7	572.2	555.6	704.1	14.1	51.7	217.9	44.8	-3.05551	1.00367e-05	0.000404021	Down
VSIG2	0	1.3	3.7	2	90	21.8	10.4	296.2	5.7555	6.75053e-07	5.22411e-05	Up
PRDM11	635.4	496.9	469.4	428.1	125.9	131	403.6	217.3	-1.20441	0.00443633	0.0381888	Down
SYT13	0	0.6	0	0	96.5	34.9	0.5	119.7	7.09338	7.0739e-06	0.000297391	Up
SNAI2	576.2	621	583.1	393.9	261.1	77.9	228.8	299.5	-1.32412	0.00172743	0.0197055	Down
CD74	5277.2	5557.9	3395.9	4404.2	22583.1	88406.3	9159.6	13466.7	2.84204	1.23286e-05	0.000471183	Up
RUNX3	53.8	32.9	9.2	22.2	2639.6	709.7	27.9	77.6	4.90106	4.71033e-06	0.000227404	Up
PLEKHB1	59.2	20.3	58.7	39.3	524.6	894.6	66.6	166.5	3.24718	1.07268e-05	0.00042349	Up
SERPINB1	210	196.2	220	233.7	451.1	730.1	247.4	571.7	1.21667	0.000681489	0.0102223	Up
FHL1	1593.9	1124.2	1663.1	1072.8	168.2	150.7	571.2	614.5	-1.85676	0.000277514	0.00520089	Down
NLRP2	16.2	7.6	0	3	1786.2	259.9	1.1	4.7	6.33496	0.000946314	0.0129463	Up
SLC45A4	161.5	144.3	152.2	145.1	1146.9	1654.5	153.5	422.6	2.48727	6.69748e-05	0.00173343	Up
ALAS1	220.8	294.4	227.4	237.7	526.4	1439.7	351.7	407.9	1.47142	0.00218305	0.0231475	Up
DEF6	75.4	69	55	47.3	397	337.7	81.4	138.4	1.9661	0.000250809	0.00482241	Up
GCLM	37.7	39.2	29.3	24.2	78.8	179.8	43.7	70.9	1.52792	0.00375247	0.0340745	Up
DEPDC1	0	1.3	1.8	1	80	8.7	2.7	10	4.33419	0.0010469	0.0139183	Up
TYMP	166.9	106.3	53.2	80.6	3261.9	797.8	241.4	577	3.59891	7.24896e-07	5.49029e-05	Up
TNFRSF1B	350	286.8	284.2	290.1	763.4	577.9	542.8	657.9	1.08592	5.25238e-08	7.40333e-06	Up
POU2F2	10.8	14.6	7.3	15.1	70	52.4	32.2	74.9	2.19384	1.43899e-05	0.000531	Up
ARNTL2	21.5	1.9	1.8	1	83.5	32.8	9.8	48.8	3.246	0.00175849	0.0199519	Up
BAK1	123.9	177.2	146.7	160.2	1261	487.7	152.9	358.4	1.88798	0.00107677	0.0141582	Up
GRN	1502.4	1999.7	1547.6	1531.2	6667.2	3446.5	2213.3	6172	1.49029	8.43553e-05	0.00206637	Up
CHPF2	500.8	605.2	421.7	469.4	2227.3	1153	622.5	1210.9	1.38342	0.000455007	0.0075214	Up
DAPK2	37.7	37.3	38.5	29.2	200.6	147	30	136.4	1.85548	0.00109604	0.0143027	Up
HOXC8	32.3	71.5	66	45.3	7.1	5.1	21.8	16.7	-2.10824	0.00028529	0.00532735	Down
PI4K2B	53.8	63.9	66	44.3	138.2	184.2	71.5	99	1.1057	0.00543161	0.0440275	Up
VCAN	59.2	57	7.3	47.3	1134.5	264.2	286.2	853.2	3.90488	5.72351e-09	1.41316e-06	Up
MSR1	43.1	51.3	58.7	47.3	506.4	141.9	151.3	203.9	2.31392	2.42489e-06	0.000138673	Up
CDH1	48.5	129.1	121	88.6	1610.3	3793	222.8	1329.2	4.15089	1.82594e-09	6.31166e-07	Up
RAI14	123.9	209.5	133.9	183.3	410.5	201.6	284	950.1	1.49379	0.00323947	0.0307418	Up
RAB27B	0	1.9	0	0	11.8	17.5	2.7	26.7	4.1217	0.00270495	0.0270061	Up
TNC	145.4	44.9	9.2	48.4	2012.6	59	56.2	312.9	3.32716	0.00189321	0.020985	Up
CAPG	150.8	176.6	196.2	135	3016.6	1445.6	158.9	472	2.95015	4.45952e-05	0.00128697	Up
ADAM28	53.8	34.8	12.8	13.1	72.3	163	44.2	95.6	1.80045	0.00327603	0.0309838	Up
LCP2	64.6	57	36.7	38.3	217.6	161.6	85.2	159.8	1.70066	2.19301e-05	0.000749719	Up
ARAP2	16.2	27.9	9.2	20.1	105.3	133.2	23.5	46.1	2.02469	0.00227965	0.0238948	Up
CP	0	19	9.2	1	1311.6	1384.4	10.9	4	6.47265	0.000255208	0.00487686	Up
TSPAN17	269.2	296.3	238.4	290.1	1065.7	1028.5	353.3	490.8	1.4235	0.000410681	0.00695876	Up
ARHGEF5	193.9	241.2	379.6	289.1	1709.7	982.6	275.8	365.7	1.59113	0.00556806	0.044853	Up
NFE2L3	48.5	35.4	31.2	36.3	134.1	104.1	49.1	76.9	1.30709	0.00200781	0.0218555	Up
MCUR1	129.2	138.6	117.4	134	468.2	666.7	140.3	202.6	1.50726	0.00262757	0.026506	Up
LAMC3	75.4	22.2	69.7	35.3	59.4	308.6	62.8	615.1	2.39985	0.0020429	0.0221136	Up
COL23A1	0	8.2	0	4	231.1	679.8	8.2	7.4	6.01347	1.48398e-05	0.000544416	Up
HOMER3	280	456.4	311.7	326.4	1063.4	1222.8	401.4	730.8	1.30717	0.000743117	0.0108435	Up
RAD51	10.8	10.1	5.5	6	187	28.4	8.2	21.4	2.94895	0.00238507	0.0246674	Up
CYBA	414.6	532.4	308.1	370.7	4356.4	2254.2	643.8	1155.4	2.37025	1.60955e-05	0.000582246	Up
PRSS8	10.8	1.9	1.8	11.1	1458.6	700.9	20.8	651.9	6.89632	1.14534e-11	1.11349e-08	Up
KCNQ1	59.2	41.1	27.5	30.2	114.1	210.4	73.2	544.9	2.61197	4.94357e-05	0.00139813	Up
ENTPD2	16.2	3.2	5.5	14.1	146.4	110.6	6.6	40.8	3.06494	0.000922486	0.0127511	Up
PLEKHH1	32.3	26.6	22	12.1	135.9	167.4	16.4	189.2	2.4926	0.000416438	0.00703332	Up
RELT	21.5	28.5	22	16.1	377	108.5	86.8	143.1	3.01085	1.37994e-07	1.4406e-05	Up
LAMC2	5.4	53.2	25.7	27.2	2315.5	2189.4	50.8	160.5	5.35759	9.70978e-08	1.13174e-05	Up
RASGRF1	123.9	70.9	9.2	89.7	2.9	19.7	14.7	4	-2.8143	0.000770466	0.0111692	Down
UNKL	872.4	497.6	872.8	701.1	239.4	273.7	579.4	361.7	-1.01281	0.00502402	0.0417564	Down
TBXAS1	32.3	30.4	27.5	21.2	100	133.9	79.7	143.1	2.06687	1.63768e-08	2.99695e-06	Up
ALDH18A1	452.3	446.9	489.6	546	828.7	1587.5	564.1	1128.6	1.08476	0.00169572	0.0194952	Up
GNA15	16.2	24.7	18.3	16.1	304.1	60.4	62.8	99	2.77739	1.35147e-05	0.000510244	Up
COL11A1	5.4	30.4	9.2	18.1	1822.7	118.6	36.6	726.8	5.35207	6.91127e-08	8.74022e-06	Up
VMP1	355.4	592.5	344.7	429.1	879.3	1310.2	1006.4	873.9	1.22921	6.68027e-06	0.000289447	Up
RPL18	24754.5	27142.6	39434.4	32655.6	9291.6	7987	25559.9	12154.2	-1.17291	0.00406925	0.0361491	Down
ATP2C2	0	5.7	1.8	0	10.6	98.3	2.2	164.5	4.91369	0.000444748	0.00740691	Up
SLC12A2	113.1	190.5	111.9	91.7	387.6	234.4	133.2	473.4	1.26646	0.00626211	0.0487571	Up
EYA2	32.3	15.2	23.8	12.1	3233.6	4929.9	18.6	43.5	6.64581	2.92326e-06	0.000158436	Up
ABCA7	70	40.5	20.2	44.3	318.2	1720.7	41.5	90.9	3.65235	0.00011798	0.0026791	Up
BCAS1	0	0.6	0	1	8.8	14.6	1.6	128.4	5.77462	0.000171604	0.00360717	Up
NTN1	48.5	46.8	45.8	27.2	284.1	804.3	48.6	193.9	2.99305	2.93274e-05	0.000919733	Up
MCM10	0	3.8	0	0	111.2	15.3	5.5	5.3	4.65414	0.0022107	0.023361	Up
ERBB3	86.2	26.6	23.8	28.2	906.3	1334.9	21.8	1132	4.41555	5.41662e-07	4.36558e-05	Up
PDIA5	188.5	184.8	115.5	163.2	574	563.4	199.9	490.1	1.4911	0.000139176	0.00304484	Up
COL17A1	10.8	5.1	1.8	2	10	155.8	8.7	218.6	4.52104	4.95346e-05	0.00139838	Up
PDE4A	26.9	32.9	22	43.3	238.2	139.8	27.9	125	2.06152	0.000975823	0.0131991	Up
CTNNA2	0	0.6	1.8	1	15.3	77.2	0	54.8	5.11958	0.00072971	0.0107082	Up
NGEF	21.5	29.1	42.2	31.2	427.6	331.9	33.9	180.5	2.95277	1.37928e-05	0.000519357	Up
ASPM	0	1.9	0	2	119.4	31.3	1.6	16.7	4.96487	0.000238599	0.0046524	Up
CD84	43.1	23.4	27.5	30.2	166.4	81.5	74.8	143.1	1.98368	3.50325e-06	0.000182863	Up
SPI1	102.3	91.2	56.8	66.5	685.8	263.5	188.9	295.5	2.19547	2.66211e-06	0.00014842	Up
MPPED2	10.8	11.4	7.3	1	261.7	121.6	4.4	6.7	3.73328	0.00171996	0.019672	Up
PFKP	204.6	460.8	313.6	252.8	2480.2	508.1	453.3	1574.6	2.01994	0.00046165	0.00760696	Up
PKM	3537.9	3510.1	4694.1	4022.4	23142.4	24909.3	3426.2	5995.5	1.86614	0.00153057	0.0182092	Up
HYAL2	689.3	871.7	647.3	671.9	2112	2196	902.7	1220.2	1.15727	0.000715283	0.0105863	Up
FGFR3	10.8	13.3	7.3	6	290.5	37.8	16.4	128.4	3.66434	2.60625e-05	0.000842832	Up
BCL3	113.1	149.4	100.9	72.5	902.8	948.4	464.2	270.1	2.56741	3.36371e-08	5.49188e-06	Up
HES2	0	0.6	3.7	2	44.7	324.6	0	13.4	5.7668	0.000272959	0.00513408	Up
ATP1B3	253.1	214.6	245.7	245.8	381.1	1321.1	773.3	492.1	1.63182	7.26793e-05	0.00184629	Up
PTPN3	59.2	14.6	20.2	14.1	284.1	283.1	24	125.7	2.84233	0.000214549	0.00429513	Up
ST6GALNAC1	37.7	47.5	22	31.2	66.5	101.2	32.8	359.7	2.01364	0.00538738	0.0438518	Up
WIPI1	96.9	93.1	122.9	83.6	258.8	230.7	185.1	193.9	1.141	6.66826e-06	0.000289447	Up
ST6GALNAC2	10.8	19.6	7.3	11.1	283.5	168.9	19.7	7.4	3.26558	0.000961019	0.0130554	Up
CAMK2A	16.2	16.5	27.5	10.1	0.6	1.5	4.9	1.3	-3.04394	0.000359861	0.00626835	Down
MGAT4A	32.3	89.9	60.5	48.4	134.7	233.6	90.7	268.8	1.60653	0.000756408	0.0110065	Up
TRIP13	16.2	28.5	38.5	28.2	361.1	103.4	36.6	28.1	2.22319	0.00543081	0.0440275	Up
CDH19	59.2	1.3	11	2	0	1.5	0	0	-5.7271	0.00135707	0.0168947	Down
LNX1	5.4	7	5.5	12.1	64.1	96.8	5.5	70.2	2.91844	0.00057178	0.00897465	Up
TRHDE	236.9	78.5	150.4	78.6	8.2	4.4	59	14	-2.64684	0.000740783	0.0108196	Down
P4HA2	107.7	78.5	60.5	81.6	819.3	674	118.5	457.3	2.67139	1.04313e-06	7.21147e-05	Up
FCGR2B	43.1	42.4	44	57.4	462.9	155.8	160	286.8	2.50092	2.59703e-08	4.53896e-06	Up
TRNT1	59.2	55.1	60.5	58.4	133.5	165.2	72.6	94.3	1.00099	0.00541528	0.0439638	Up
STK10	247.7	200.7	122.9	185.4	578.1	368.3	186.8	527.5	1.14488	0.00565247	0.0453451	Up
LLGL2	215.4	223.5	199.9	225.6	1836.2	540.1	174.7	902	1.99772	0.000791249	0.0113856	Up
ST6GAL1	403.9	413.4	264	264.9	951	4114.7	362.6	414.5	2.11894	0.00324118	0.0307418	Up
CA12	5.4	8.2	7.3	28.2	288.8	894.6	12	16	4.57293	6.4283e-05	0.00168621	Up
MGLL	312.3	200	132	104.8	672.3	1243.2	168.7	1287.8	2.1839	0.00034077	0.0060235	Up
ENO1	3570.2	4059.5	4217.4	4727.5	23719.4	11154.7	4522.7	9355.3	1.55624	0.000777984	0.0112268	Up
TXK	0	0.6	0	0	12.9	21.1	0.5	9.4	4.5739	0.00455515	0.0389315	Up
GTSE1	0	8.2	0	7.1	177	34.2	6.6	21.4	3.74065	0.00173813	0.0197925	Up
CELSR1	96.9	63.9	60.5	81.6	2837.8	1230.8	57.9	100.3	3.80827	5.51622e-05	0.00150271	Up
ADD2	10.8	10.1	12.8	8.1	276.4	152.9	26.2	23.4	3.53354	2.66814e-05	0.000853971	Up
CACNG4	0	6.3	3.7	12.1	197.6	451.3	8.7	19.4	4.78424	2.59711e-05	0.000842315	Up
RGS11	0	8.2	0	2	49.4	74.2	0.5	101	4.18326	0.0019706	0.0215409	Up
TPD52	86.2	26	12.8	14.1	398.2	416.3	12.6	314.3	3.11388	0.000551422	0.00872571	Up
TRAF4	150.8	272.2	132	123.9	1092.2	898.2	621.5	512.2	2.18953	1.49162e-08	2.7775e-06	Up
CAMSAP3	86.2	34.2	14.7	38.3	615.8	574.3	15.8	184.5	3.04445	0.000562302	0.0088708	Up
RAP1GAP	26.9	41.8	77	38.3	645.8	734.4	43.7	156.5	3.0884	6.00502e-05	0.00159945	Up
STXBP2	64.6	46.8	29.3	61.4	1186.3	801.4	71	300.9	3.55528	7.78829e-07	5.71447e-05	Up
UBE2T	0	9.5	5.5	3	140.6	92.4	6	28.1	3.69087	0.000263584	0.00499396	Up
IL4R	323.1	310.8	139.4	183.3	908.7	517.5	392.1	782.3	1.45218	0.000305572	0.00562505	Up
APBB1IP	16.2	13.9	11	31.2	134.7	93.2	38.8	72.2	2.19546	9.87509e-05	0.00235594	Up
LAMP3	0	3.2	0	1	43.5	38.6	2.7	13.4	4.03576	0.0011798	0.0151854	Up
OSBPL6	43.1	25.3	31.2	22.2	11.8	10.2	10.4	10.7	-1.40285	0.00134209	0.0167681	Down
SLC1A3	177.7	69	183.4	95.7	487	2812.5	149.1	58.2	2.74399	0.00365337	0.033448	Up
CEACAM1	21.5	17.1	3.7	15.1	112.3	294.1	37.7	80.2	3.23187	9.98695e-06	0.000403499	Up
SMARCA2	2859.4	3161.3	3443.6	3644.6	1068.1	1216.3	2877.4	1339.2	-1.01212	0.00470362	0.039859	Down
NDC80	5.4	1.3	0	0	73.5	8	4.4	12	4.62904	0.00100653	0.013497	Up
PKP1	0	0	0	0	29.4	16.7	0	30.8	6.04354	0.00211496	0.0226728	Up
STK17B	37.7	33.5	11	24.2	164.1	201.6	69.4	113	2.39912	2.04267e-06	0.000120813	Up
ATP8B1	129.2	62.7	44	37.3	636.4	297	63.3	462	2.45884	0.000223488	0.00440603	Up
FYB1	43.1	24.1	5.5	20.1	62.3	90.3	40.4	80.2	1.66657	0.00268005	0.0268782	Up
SEMA5B	59.2	19.6	29.3	44.3	177	153.6	28.4	141.1	1.76716	0.00400973	0.0357225	Up
ITGB5	888.5	1111.6	1389.9	922.7	3738.9	1228.7	1220	7641.7	1.68048	0.00401815	0.035777	Up
GRHL2	5.4	2.5	7.3	1	522.9	561.9	4.4	62.2	6.27287	9.89501e-08	1.13174e-05	Up
RPS5	25923	26717.8	44889.5	33860.4	12167	9108.6	27459.7	13931.4	-1.06812	0.00647586	0.0499663	Down
GSTP1	2918.6	2970.1	3676.5	3303.1	9318.6	9834.3	3237.8	4539.9	1.0652	0.00623269	0.0486206	Up
CD82	490	322.2	311.7	273	1149.8	2280.4	367	811.7	1.72858	0.000891307	0.0124455	Up
MECOM	86.2	73.4	40.3	28.2	523.5	460	80.8	262.1	2.56824	2.35888e-05	0.000794206	Up
PILRA	37.7	23.4	34.8	26.2	84.7	62.6	49.1	78.2	1.24409	0.000836604	0.0119338	Up
IGSF9	10.8	62	25.7	59.4	626.4	398.1	59	176.5	2.94144	6.45393e-05	0.00168995	Up
WNT11	32.3	46.2	31.2	51.4	2132.6	605.6	128.3	32.8	4.15924	1.04962e-05	0.0004165	Up
TTC39A	0	3.2	5.5	2	34.7	258.4	8.7	54.2	4.9055	6.06728e-06	0.000269647	Up
MGST2	64.6	107.6	106.4	109.8	321.7	618.7	125.6	218.6	1.70635	0.000713092	0.010574	Up
RAD54L	0	3.8	5.5	1	235.3	35.7	9.8	12	4.67818	8.7398e-05	0.00213754	Up
SNX10	10.8	2.5	1.8	5	40.6	31.3	9.3	14	2.52964	0.00269366	0.0269626	Up
FAT2	16.2	7.6	3.7	3	417.6	537.9	3.8	10	5.11647	2.91715e-05	0.000916693	Up
LAT2	59.2	41.1	22	38.3	234.7	130.3	80.3	98.3	1.80745	0.000148229	0.00319793	Up
NOX4	0	9.5	7.3	6	88.8	11.6	10.4	75.6	2.84993	0.00224033	0.023578	Up
BAX	166.9	171.5	221.9	208.5	626.4	367.6	247.4	464	1.14359	0.00072802	0.0107036	Up
PTHLH	0	19.6	3.7	13.1	55.9	20.4	78.1	77.6	2.45212	0.0011447	0.0147889	Up
TFAP2C	5.4	5.1	1.8	11.1	110.6	807.2	14.2	6	5.29606	1.97607e-05	0.000693854	Up
AURKA	21.5	20.9	20.2	14.1	390.5	93.2	133.8	24.1	3.07952	4.20107e-05	0.00122145	Up
CASS4	26.9	27.2	16.5	18.1	38.2	60.4	45.9	72.2	1.30377	0.00196713	0.0215181	Up
SULT2B1	0	0	0	1	9.4	32.8	0	34.1	5.21745	0.00400704	0.0357208	Up
TPX2	10.8	7	22	1	617	139	12	60.8	4.38883	5.37778e-05	0.00147794	Up
SIGLEC1	129.2	103.2	34.8	61.4	465.8	245.3	237.6	289.5	1.94901	1.33342e-05	0.000505886	Up
SLC4A11	10.8	12.7	7.3	7.1	462.3	598.3	1.6	15.4	4.83703	6.24462e-05	0.00165477	Up
OAS1	177.7	181	132	141	655.2	788.3	161.6	290.9	1.5881	0.00150497	0.0180214	Up
FXYD5	118.5	109.5	113.7	152.1	356.4	387.2	163.3	279.5	1.25981	0.00025193	0.00483293	Up
FXYD3	0	5.7	14.7	5	60	1045.2	3.8	501.5	5.90667	1.07422e-06	7.34354e-05	Up
GMIP	75.4	91.2	69.7	107.8	478.2	168.1	124	205.3	1.49166	0.00174189	0.019817	Up
BIRC5	10.8	2.5	5.5	1	474.6	64.1	7.6	46.8	5.16674	6.87989e-06	0.000293197	Up
ARHGAP4	183.1	158.3	99	150.1	656.4	1318.2	251.7	299.5	2.10243	0.000115307	0.00263377	Up
RGS1	5.4	59.5	1.8	30.2	373.5	129.6	114.1	41.5	2.69226	0.00372734	0.0339057	Up
NDUFB2	463.1	454.5	460.2	496.6	1781.5	1155.1	511.7	681.3	1.13924	0.00486662	0.0408087	Up
ICAM1	188.5	216.5	144.9	224.6	1267.5	191.4	905.4	519.5	1.89444	0.000337074	0.00599221	Up
LYZ	161.5	130.4	25.7	70.5	561.1	126.7	161.6	5330.9	4.00064	0.000106295	0.00248596	Up
DNAJB11	123.9	170.9	128.4	189.4	489.3	604.9	181.8	301.5	1.35166	0.00126298	0.0159981	Up
CD209	26.9	25.3	12.8	26.2	50	29.1	116.9	76.2	1.58519	0.00418819	0.0368688	Up
KIF4A	0	5.7	3.7	5	280.5	45.9	2.7	16.7	4.40776	0.000297324	0.00552553	Up
CMTM6	253.1	282.3	232.9	199.5	1153.9	979	311.8	457.3	1.58501	0.000356231	0.00624006	Up
SEL1L3	166.9	171.5	144.9	174.3	1359.2	344.3	260.5	962.1	2.15329	4.47978e-05	0.00129043	Up
PITPNM3	2143.2	1354.7	4103.7	1840.4	652.3	790.5	1275.7	575.7	-1.51875	0.000328455	0.00589871	Down
TGM1	32.3	20.3	18.3	53.4	632.3	107	30	68.9	2.75289	0.00157627	0.0185041	Up
COL9A3	64.6	34.8	5.5	25.2	122.3	183.4	30	687.3	3.02197	0.000718308	0.0106109	Up
CLSPN	5.4	1.9	3.7	1	93.5	29.8	4.4	6	3.73702	0.00142442	0.01746	Up
CDC45	0	4.4	0	0	144.1	24.7	3.8	19.4	4.95094	0.000627641	0.00963433	Up
ADA2	145.4	146.9	49.5	126.9	384.1	347.9	151.8	379.8	1.43596	0.00142964	0.0174997	Up
GABRP	0	0	1.8	3	55.9	60.4	3.3	123	5.4325	1.44058e-05	0.000531	Up
CDC6	10.8	11.4	3.7	10.1	117.6	65.5	14.7	23.4	2.62011	0.000972644	0.013179	Up
HOOK2	183.1	289.9	264	354.6	1133.4	1201.7	303.6	468.7	1.50075	0.00191036	0.0210367	Up
PTGS1	70	58.9	80.7	95.7	2746.1	1818.2	104.8	196.6	3.99313	2.26068e-06	0.000132199	Up
TBC1D2	59.2	84.8	93.5	87.6	314.7	293.3	101	242	1.52478	0.000220762	0.00438564	Up
TREM2	21.5	22.2	40.3	39.3	448.2	199.4	74.8	70.2	2.66542	5.41451e-05	0.00148541	Up
CRISP3	53.8	47.5	36.7	19.1	1882.7	473.8	19.1	16.7	3.93897	0.000454533	0.0075214	Up
DSP	107.7	129.1	64.2	45.3	4830.5	3791.5	74.8	1045.7	4.81747	4.174e-08	6.36535e-06	Up
CDC7	16.2	11.4	0	5	41.2	25.5	25.1	31.4	2.05592	0.00349721	0.032419	Up
TSPAN15	80.8	36.1	71.5	49.4	510.5	449.1	65.5	542.9	2.75097	6.7455e-06	0.000290655	Up
HSD3B7	80.8	154.5	143	170.2	457	235.8	233.7	284.8	1.11013	0.00150221	0.0180023	Up
MISP	0	6.3	7.3	11.1	397	128.1	20.8	926.7	5.74695	5.8471e-09	1.42112e-06	Up
CEP170B	344.6	450.7	313.6	319.3	1451.5	668.2	376.3	841.8	1.2226	0.00351081	0.0325257	Up
IZUMO4	70	100	111.9	101.7	8.2	10.2	65	10.7	-2.02889	0.00430946	0.037596	Down
RASSF7	37.7	111.4	97.2	91.7	1448.6	666	62.3	405.2	2.91587	9.63436e-05	0.00232345	Up
SLC7A4	5.4	5.7	7.3	6	21.8	79.3	2.7	143.8	3.32928	0.0010216	0.013652	Up
OSM	0	13.9	0	12.1	355.2	36.4	49.7	12.7	3.96805	0.000952743	0.0129885	Up
GGT5	118.5	164.6	97.2	248.8	282.9	405.4	383.9	1570.6	2.06173	0.000571504	0.00897465	Up
SEC14L2	26.9	45.6	40.3	41.3	80	122.3	102.7	101	1.32287	1.64313e-05	0.000590298	Up
CYTH4	123.9	129.1	67.8	98.7	394.6	201.6	237	326.3	1.47406	1.92342e-05	0.000676897	Up
SOX10	107.7	13.3	20.2	8.1	0.6	1.5	7.6	6	-3.15881	0.00232142	0.0241374	Down
SLC5A1	0	2.5	3.7	0	158.2	85.2	1.1	1191.5	7.66643	3.1056e-05	0.000964223	Up
KDELR3	32.3	55.7	42.2	32.2	339.9	99	85.7	444	2.55484	2.28145e-05	0.000771479	Up
CYP2D6	16.2	1.3	3.7	4	12.4	33.5	10.9	94.9	2.9465	0.00332475	0.0313624	Up
POLDIP3	2622.5	2814.4	3087.9	3275.9	906.9	928	2181.1	1509.1	-1.09512	0.00104346	0.0138846	Down
BIK	5.4	1.3	1.8	0	98.2	21.1	7.6	24.1	4.74424	5.53017e-05	0.00150388	Up
ARSA	134.6	214.6	124.7	191.4	385.2	554.6	238.1	435.3	1.25822	0.000319856	0.00581914	Up
NCF4	21.5	39.2	22	35.3	165.9	74.2	80.8	179.9	2.02229	1.59822e-05	0.000579494	Up
CSF2RB	26.9	41.8	11	24.2	155.3	45.9	84.6	149.8	2.04092	0.000325076	0.00587971	Up
ST13	11712.2	10666.4	12859.4	9833.9	1455.7	2115.9	8635.9	3787.1	-1.49456	0.00409453	0.0362083	Down
GZMB	5.4	5.7	0	5	71.2	10.9	11.5	15.4	2.74257	0.00620961	0.0484892	Up
CDKN3	0	4.4	5.5	7.1	90.6	18.2	8.2	12	2.75187	0.00576286	0.0459228	Up
PLEK2	0	0.6	1.8	1	90.6	8.7	3.3	76.9	5.42827	3.40488e-05	0.00103443	Up
CCNB1IP1	883.1	1139.4	1309.2	992.3	251.7	313	802.8	429.3	-1.26799	0.00139341	0.0171973	Down
PCK2	26.9	56.3	40.3	32.2	448.8	404	56.2	699.4	3.33925	3.66273e-07	3.20077e-05	Up
REC8	26.9	58.9	22	70.5	511.1	309.3	39.3	151.1	2.47092	0.000677452	0.0101814	Up
GSS	280	227.9	253	321.3	766.9	774.5	307.5	581	1.16821	0.000722861	0.010668	Up
MMP9	32.3	10.1	0	3	783.4	6.6	11.5	72.2	4.38352	0.00161931	0.0188254	Up
MYBL2	10.8	8.9	1.8	4	988.7	101.2	7.6	32.1	5.53187	4.27703e-06	0.00021392	Up
RAB5IF	339.2	366.5	399.7	285.1	1371	1655.9	334.8	528.9	1.48414	0.00322307	0.0306261	Up
SALL4	0	0	1.8	0	352.3	483.3	9.8	5.3	8.7157	5.47489e-08	7.53645e-06	Up
DOK5	32.3	57.6	7.3	22.2	691.7	236.6	57.9	163.1	3.25284	3.87582e-05	0.00114399	Up
DNAJC5	543.9	689.4	698.6	645.7	2936	2348.1	752	1071.1	1.4614	0.0009753	0.0131991	Up
CTSZ	1303.2	1507.9	1276.2	1246.1	4988.1	3084	1812.5	4017.1	1.38166	2.86859e-05	0.000906083	Up
PRELID3B	145.4	166.5	133.9	114.8	331.1	539.4	151.3	232.7	1.16185	0.00621682	0.0485211	Up
SLCO4A1	16.2	12	9.2	10.1	135.3	142.7	74.8	52.8	3.16772	1.13215e-09	4.09547e-07	Up
SLC17A9	16.2	27.9	33	41.3	204.1	104.8	47	113.7	1.93215	0.000265994	0.00502738	Up
COL20A1	48.5	13.3	9.2	7.1	0	0	0.5	0.7	-5.83432	1.77585e-05	0.000634247	Down
PTK6	0	3.8	0	3	191.7	147.8	3.8	179.9	5.88089	3.90769e-07	3.37689e-05	Up
SLC52A3	10.8	18.4	22	11.1	104.1	144.8	39.9	161.1	2.81222	5.53183e-07	4.43107e-05	Up
HCK	48.5	53.8	36.7	45.3	334.1	125.2	155.1	294.2	2.29837	6.02703e-08	7.81254e-06	Up
E2F1	21.5	36.1	31.2	26.2	510.5	206.7	36	42.1	2.7711	0.000568862	0.00896519	Up
WFDC2	53.8	62.7	56.8	42.3	10564.9	14685.6	83	46.8	6.87865	1.71685e-06	0.00010514	Up
FAM83D	10.8	7.6	3.7	7.1	492.3	81.5	7.1	38.8	4.46436	2.55818e-05	0.000835976	Up
SYNDIG1	5.4	35.4	1.8	15.1	564	48	14.2	337.7	3.98456	0.000205779	0.00415161	Up
LIPG	0	1.9	1.8	1	152.3	10.2	12	107.6	5.58363	1.8901e-06	0.000113079	Up
RBBP8	32.3	58.9	18.3	29.2	147	315.2	60.6	90.3	2.11722	0.000611538	0.00947458	Up
MXRA5	75.4	64.6	117.4	262.9	2182	1409.9	788	1292.4	3.42998	2.90592e-11	1.96529e-08	Up
TLR8	0	5.1	1.8	2	18.8	8	16.9	25.4	2.58982	0.00296302	0.0289982	Up
ABCD1	102.3	212.7	139.4	143	418.8	436.7	208.1	292.9	1.15558	0.00125648	0.0159587	Up
CACNA1F	0	0	0	0	11.2	69.9	1.6	0.7	6.15838	0.00153384	0.0182181	Up
RENBP	64.6	26.6	22	19.1	280	86.6	51.9	101	2.06964	0.00113088	0.0146347	Up
SLC35A2	102.3	158.3	128.4	152.1	849.3	775.9	164.9	273.5	1.92073	0.000338706	0.0060043	Up
PCSK1N	26.9	43.7	11	63.5	180.6	51	48.1	535.6	2.46585	0.00305031	0.0295516	Up
PGK1	1534.7	1589.5	1765.8	1686.3	11761.2	5301.1	1702.2	3175.9	1.73806	0.00106037	0.0140247	Up
BRS3	21.5	7.6	5.5	2	0.6	0	0.5	0	-4.72051	0.00148253	0.0178627	Down
VGLL1	0	0	0	0	34.1	104.1	2.7	3.3	6.95045	5.32575e-05	0.00147144	Up
TIMP1	2428.6	2542.2	3740.6	2096.3	4508.7	5448.1	7189.3	24450.1	1.94434	0.000403067	0.00686532	Up
PCDH11X	64.6	79.1	16.5	30.2	0.6	0.7	12.6	4	-3.38922	0.000403401	0.00686532	Down
GLA	134.6	107.6	80.7	122.9	257	324.6	192.8	133.7	1.03997	0.0038257	0.0344978	Up
RUBCNL	5.4	9.5	18.3	14.1	60.6	34.2	27.3	49.5	1.78517	0.000645377	0.00983236	Up
NDFIP2	102.3	116.5	77	93.7	478.2	227.8	140.3	189.9	1.41052	0.00129688	0.0163212	Up
TNFSF13B	5.4	5.7	3.7	13.1	50	23.3	42.6	31.4	2.31411	0.000146149	0.00316621	Up
KLF5	70	36.7	78.8	68.5	1377.4	432.4	65	511.5	3.24033	7.56799e-06	0.000315603	Up
RGCC	32.3	8.9	11	6	288.2	115.7	27.9	100.3	3.38772	1.11071e-05	0.000434589	Up
MSLN	16.2	45.6	58.7	87.6	4485.2	10187.3	47.5	540.2	6.17988	7.45036e-09	1.67384e-06	Up
CORO1A	226.2	169.6	128.4	200.5	1559.2	584.5	203.7	442.6	1.95012	0.000676374	0.0101777	Up
ELMO3	16.2	24.7	25.7	20.1	386.4	1046.7	18.6	296.2	4.31458	4.51821e-07	3.77853e-05	Up
PLLP	70	38.6	45.8	49.4	221.7	707.5	48.6	246.1	2.60913	0.000128978	0.00287428	Up
MMP15	129.2	103.2	31.2	105.8	359.9	633.3	82.5	487.4	2.09143	0.0008735	0.0122851	Up
SLC7A6	59.2	82.9	77	61.4	148.8	326.8	86.3	167.2	1.36185	0.00265925	0.0267472	Up
ESRP2	5.4	8.2	12.8	7.1	389.4	1044.5	6	197.2	5.58203	5.74335e-08	7.70766e-06	Up
FA2H	0	0	0	0	10	15.3	2.2	55.5	6.15192	0.000150044	0.00322812	Up
COTL1	247.7	283	287.9	280	1100.4	516.1	393.2	1186.1	1.53734	0.000128624	0.00287051	Up
HAGHL	10.8	24.1	25.7	16.1	337	223.5	24.6	53.5	3.01846	0.000125906	0.00281793	Up
METRN	91.5	112.7	82.5	104.8	468.8	749.7	86.8	155.8	1.89516	0.00239886	0.0247442	Up
CPPED1	102.3	186.1	139.4	115.8	331.7	654.4	149.1	333	1.4189	0.00238279	0.0246602	Up
TMC5	0	3.2	1.8	0	41.8	30.6	2.7	297.5	5.88727	2.23193e-05	0.000757584	Up
AAGAB	91.5	123.4	117.4	132	301.7	373.4	126.7	238.7	1.14589	0.0026276	0.026506	Up
CEMIP	70	73.4	128.4	47.3	408.8	312.3	118	379.8	1.9346	6.62844e-05	0.00172129	Up
RHOV	0	2.5	7.3	2	52.9	86.6	4.4	4.7	3.54069	0.0026329	0.0265423	Up
MYEF2	43.1	41.8	14.7	12.1	277	230	42.6	70.9	2.51092	0.00043925	0.00734654	Up
CA2	21.5	4.4	0	11.1	281.1	32	2.7	188.6	3.89286	0.00126087	0.0159911	Up
LAPTM4B	1077	1261	1129.5	1721.6	10264.4	12360	1819	3125.1	2.40873	2.59695e-05	0.000842315	Up
ESRP1	0	3.8	9.2	5	1071.6	1405.5	4.4	143.8	7.08212	3.44447e-09	9.56763e-07	Up
CCN4	59.2	73.4	106.4	56.4	284.7	439.6	142.5	1190.8	2.79451	6.48312e-06	0.00028462	Up
TRPS1	156.2	147.5	117.4	157.1	852.8	1123.8	157.3	143.1	1.97847	0.00258064	0.0261851	Up
TSTA3	285.4	248.8	232.9	234.7	3666.5	1310.9	265.9	772.9	2.58823	7.60305e-05	0.00190751	Up
PYCR3	91.5	111.4	201.7	142	1696.8	850.2	103.2	141.7	2.34834	0.00276734	0.0275054	Up
ANXA13	0	3.8	5.5	9.1	4.1	57.5	1.6	373.8	4.45638	0.00111536	0.0144768	Up
SQLE	145.4	134.8	64.2	146.1	1168.1	396.7	93.9	234.7	1.95095	0.00448442	0.038473	Up
SH2D4A	355.4	322.2	537.3	467.4	192.9	133.2	341.9	171.8	-1.00322	0.00606588	0.0478865	Down
TNFRSF10A	26.9	13.3	1.8	9.1	212.3	103.4	9.8	30.8	2.90787	0.00243649	0.0250493	Up
MAN2B1	608.5	643.8	768.3	517.8	1761.5	2015.5	1123.9	1584.6	1.35318	1.37381e-07	1.4406e-05	Up
KCNN4	0	16.5	9.2	6	241.1	519.7	6	84.2	4.61627	1.4448e-05	0.000531299	Up
RELB	123.9	129.8	77	91.7	582.3	162.3	221.2	277.5	1.56401	0.000609137	0.00944679	Up
KLC3	0	0.6	0	2	274.7	53.9	0	7.4	6.47284	0.000212076	0.00426208	Up
CD37	48.5	70.9	44	89.7	213.5	144.1	100.5	163.8	1.25534	0.00100395	0.0134779	Up
SF3A2	990.8	1002.1	1289.1	1245.1	291.1	268.6	798.9	625.2	-1.19075	0.00306474	0.0295733	Down
IL4I1	32.3	6.3	7.3	14.1	857.5	156.5	15.3	51.5	4.27095	3.94328e-05	0.00115731	Up
TLE6	5.4	3.2	0	1	39.4	70.6	2.2	6	3.86394	0.00250292	0.0255465	Up
LILRB1	5.4	21.5	16.5	16.1	100	67.7	51.3	92.9	2.23057	9.64287e-07	6.7871e-05	Up
ASF1B	10.8	17.7	12.8	12.1	749.9	105.5	15.8	38.1	4.06661	5.44143e-05	0.00148755	Up
TNNT1	0	1.9	3.7	0	1195.1	583	0.5	2.7	8.12473	0.000149872	0.00322812	Up
RASAL3	26.9	38.6	20.2	30.2	107	70.6	35.5	89.6	1.35038	0.00459381	0.0391544	Up
CCNE1	5.4	11.4	7.3	7.1	320	45.9	12.6	25.4	3.64011	0.000234849	0.00459534	Up
GPI	1109.3	1286.9	1525.6	1320.6	5846.2	3419.6	1260.4	2260.6	1.28558	0.00408635	0.0362083	Up
PRX	414.6	415.9	656.4	497.6	152.3	96.1	361	209.3	-1.278	0.00289526	0.0285036	Down
EBI3	10.8	11.4	3.7	11.1	39.4	34.2	25.7	54.2	2.02343	0.000197388	0.00401882	Up
TJP3	5.4	5.7	11	2	248.2	548.1	2.2	472.7	5.74102	1.85855e-07	1.84139e-05	Up
APLP1	10.8	28.5	22	12.1	292.9	246	24	54.8	3.02783	0.000130861	0.00291207	Up
MYH14	59.2	31	102.7	18.1	2325.5	1934	20.8	1533.1	4.79515	4.40454e-07	3.70338e-05	Up
SIGLEC8	0	2.5	1.8	0	8.2	56.8	2.2	11.4	3.822	0.0053182	0.0434022	Up
CD79A	48.5	26	56.8	31.2	5.3	10.2	9.8	5.3	-2.36034	5.84527e-06	0.000263546	Down
CNFN	0	0.6	0	0	48.8	15.3	0.5	2.7	5.19602	0.00296437	0.0289982	Up
GRIN2D	5.4	5.1	3.7	8.1	20	18.9	19.7	81.6	2.62904	0.000881113	0.0123142	Up
CAPS	204.6	226	311.7	184.3	3301.3	2459.5	173.1	216	2.72989	0.000880769	0.0123142	Up
FAM83E	5.4	0	1.8	2	252.9	157.2	1.1	255.4	6.64572	5.55486e-07	4.43107e-05	Up
COMP	0	1.3	0	0	411.7	65.5	24	399.2	8.42018	1.16243e-10	5.47926e-08	Up
LSR	134.6	123.4	102.7	178.3	2544.3	2229.5	136	593.1	3.35075	3.86282e-06	0.000195721	Up
HPN	10.8	3.8	22	21.2	133.5	412.7	22.9	17.4	3.3401	0.000731493	0.0107141	Up
SIPA1L3	285.4	308.9	311.7	409	1475.7	866.2	341.9	581.7	1.30889	0.0034086	0.031921	Up
ETHE1	118.5	185.5	205.4	170.2	516.4	446.9	227.2	385.1	1.19341	0.000338912	0.0060043	Up
ITGB8	107.7	122.8	111.9	164.2	1265.7	2228	122.9	90.9	2.86863	0.000739199	0.0108168	Up
SP4	188.5	179.1	185.2	174.3	74.1	57.5	141.4	62.9	-1.10815	0.00203068	0.022012	Down
ADAP1	21.5	27.2	18.3	38.3	334.1	334.8	25.1	286.8	3.19292	6.47427e-06	0.00028462	Up
TFEC	5.4	2.5	5.5	2	32.3	29.1	10.9	19.4	2.78893	0.000315227	0.00577546	Up
MET	53.8	32.9	12.8	39.3	495.8	87.3	55.7	94.3	2.43108	0.00126655	0.0160303	Up
LFNG	64.6	48.7	27.5	59.4	257	84.4	45.9	249.4	1.68315	0.00567454	0.0454753	Up
TSPAN12	26.9	30.4	12.8	15.1	159.4	141.2	28.9	110.3	2.38066	9.79457e-05	0.00235115	Up
ABHD11	64.6	62	73.3	66.5	448.2	802.8	60.6	153.8	2.45873	0.000326868	0.00589158	Up
NPTX2	32.3	29.8	20.2	16.1	258.2	353.7	60.6	583	3.70429	7.59497e-09	1.67384e-06	Up
CYP3A5	16.2	12.7	16.5	10.1	18.2	113.5	25.7	457.3	3.49633	0.000181964	0.00377394	Up
AIMP2	96.9	76	62.3	67.5	223.5	327.5	75.9	193.9	1.45884	0.00163411	0.0189408	Up
PCOLCE	430.8	469.7	425.4	629.6	1759.2	592.5	1677	2950.6	1.83336	5.26124e-05	0.0014588	Up
MEST	199.2	137.4	154	304.2	1475.1	463.7	331.5	535.6	1.81933	0.000482453	0.00787085	Up
TSPAN13	32.3	31.7	23.8	52.4	78.8	628.9	51.9	152.4	2.69148	0.000420215	0.00708175	Up
AGR2	21.5	11.4	23.8	7.1	11.2	71.3	5.5	631.2	3.52686	0.0026117	0.0264313	Up
AHR	199.2	224.7	122.9	259.9	751.7	853.1	315.6	264.8	1.43383	0.00212257	0.0227074	Up
TRIM14	113.1	157	137.5	157.1	601.7	634.7	198.2	470	1.73981	1.29774e-05	0.000494763	Up
CORO2A	16.2	13.9	12.8	9.1	281.1	449.1	19.7	242	4.28833	3.66618e-08	5.76035e-06	Up
AKNA	1583.2	950.2	1364.2	1262.2	420.5	391.6	1005.4	546.3	-1.1234	0.00220446	0.0233268	Down
DNM1	37.7	52.5	27.5	51.4	368.8	81.5	77	131	1.94185	0.00106377	0.0140466	Up
DOCK8	134.6	76.6	60.5	75.6	274.1	209.6	110.3	225.3	1.28904	0.00104228	0.0138846	Up
CA9	5.4	2.5	3.7	8.1	322.9	5.1	10.9	250.1	4.92282	2.19088e-05	0.000749719	Up
PTGDS	91.5	164.6	56.8	70.5	1823.8	226.4	440.2	2205.8	3.6078	2.19685e-07	2.05856e-05	Up
ABCA2	452.3	372.8	412.6	579.2	1281	1802.9	510.1	833.1	1.2845	0.00171819	0.0196662	Up
SHB	107.7	172.8	132	129.9	394.1	294.1	187.9	368.4	1.17501	0.000299023	0.00554386	Up
PDLIM1	285.4	253.2	146.7	205.5	659.9	394.5	408.5	934.7	1.43758	0.000158659	0.00339003	Up
RASSF4	118.5	86.7	95.3	60.4	394.1	253.3	217.9	332.3	1.77443	5.12031e-08	7.30702e-06	Up
UNC5B	258.5	327.3	196.2	305.2	2438.5	1067.8	451.6	805	2.12848	2.40132e-05	0.000803182	Up
LHPP	156.2	158.3	185.2	124.9	529.9	339.2	214.6	262.1	1.1106	0.00168199	0.0193516	Up
UBE2S	263.9	288.7	201.7	200.5	1953.8	500.8	528.1	302.9	1.78433	0.0016456	0.0190456	Up
PPIF	344.6	364	324.6	410	2102.6	1034.3	373	456	1.45742	0.00644615	0.0498359	Up
KRT23	0	8.2	5.5	6	524	524.1	4.9	0.7	5.61734	7.35526e-05	0.00185732	Up
RAPGEFL1	64.6	25.3	23.8	29.2	43.5	168.1	34.9	315.6	2.0327	0.0059891	0.0474031	Up
RNF43	16.2	26.6	9.2	28.2	92.9	171.1	35.5	291.5	2.83581	3.6834e-05	0.00110396	Up
PFN1	2692.5	3280.9	2836.7	2667.5	9638.6	5499.8	2862.6	6293.1	1.08146	0.00304484	0.0295277	Up
SYNGR2	662.3	602	687.6	689	3927.1	3447.9	581.6	932.1	1.75099	0.00231567	0.0240938	Up
LGALS3BP	4200.2	4088	3878.2	3870.3	9096.3	9827	4076	10892.5	1.07969	0.000822915	0.0117902	Up
CCL2	70	63.9	12.8	37.3	311.7	113.5	311.8	377.1	2.62742	2.65205e-06	0.00014842	Up
CCL8	0	12.7	1.8	12.1	61.8	24.7	96.7	24.7	2.73045	0.000928291	0.0127897	Up
EZH1	1362.4	1143.2	1718.1	1450.6	416.4	647.8	960.6	615.1	-1.10356	0.000286922	0.0053514	Down
COL1A1	16741.7	23123.5	15246.8	23518.8	96729.8	32399.2	31074.3	195730	2.17839	0.000173816	0.00364874	Up
LRRC59	533.1	479.2	427.2	479.5	1632.1	1185.7	558.7	1100.6	1.22456	0.00033537	0.00597967	Up
ABCC3	32.3	44.3	29.3	38.3	309.4	144.1	67.7	1433.5	3.75025	4.16701e-06	0.00020909	Up
FAM20A	150.8	236.1	251.2	166.2	841.1	463.7	456	494.1	1.47285	4.51477e-06	0.000221537	Up
SLC9A3R1	183.1	174.7	216.4	221.6	2003.8	2533.7	175.3	1087.2	2.86452	7.05784e-06	0.000297391	Up
CDR2L	96.9	130.4	88	115.8	4062.3	606.3	125.1	387.8	3.58385	2.44495e-05	0.000810899	Up
NEIL3	0	0	0	0	34.7	5.1	0.5	4.7	5.27267	0.00554402	0.0447289	Up
NCAPG	0	0.6	5.5	1	168.8	32	3.3	19.4	4.90514	0.000135887	0.00300245	Up
CTSC	274.6	195.6	218.2	218.6	921.6	393.8	552.6	605.8	1.46186	3.68538e-06	0.000189195	Up
ZBTB16	1211.6	841.9	726.1	209.5	23.5	237.3	221.2	169.2	-2.19615	0.00142202	0.0174445	Down
MTCH2	150.8	257.6	176	173.3	452.3	476	187.9	448.6	1.03168	0.00558917	0.0449997	Up
SIAE	70	116.5	110	79.6	240.6	371.9	159.5	357	1.56085	2.63134e-05	0.000847423	Up
UNC93B1	242.3	217.8	205.4	134	1798	2473.3	249	601.1	2.68361	2.02116e-05	0.000708088	Up
MS4A6A	161.5	113.9	77	78.6	369.9	291.2	330.4	419.9	1.76605	5.71497e-09	1.41316e-06	Up
MS4A4A	32.3	35.4	36.7	41.3	161.2	93.9	160.6	199.2	2.05583	5.27546e-09	1.34524e-06	Up
CCND1	290.8	186.1	146.7	147.1	2282.6	3589.9	172.6	495.4	3.09184	5.17934e-05	0.00144123	Up
FOLR1	5.4	17.7	22	11.1	1995	6015.2	30	94.9	7.14048	7.65196e-10	2.97566e-07	Up
IL10RA	123.9	121.5	58.7	112.8	448.8	263.5	291.1	329	1.68321	3.76389e-07	3.2708e-05	Up
GALNT18	113.1	89.3	44	70.5	419.9	107	114.1	375.1	1.70032	0.00240084	0.0247482	Up
NECTIN1	107.7	156.4	56.8	101.7	211.7	345.7	161.6	377.1	1.36452	0.00140336	0.0172563	Up
SLC22A18	53.8	69	56.8	25.2	241.1	176.9	55.7	245.4	1.81435	0.000876812	0.0122983	Up
PITPNM1	166.9	185.5	111.9	173.3	2012.6	1287.6	162.2	640.5	2.68541	2.16763e-05	0.000747617	Up
NDUFS8	376.9	407	504.3	484.5	1840.3	1479	395.9	670	1.30476	0.00618071	0.048385	Up
EXPH5	21.5	8.2	9.2	11.1	50	65.5	19.7	19.4	1.77614	0.00616369	0.0483607	Up
SELPLG	123.9	56.3	47.7	74.5	308.8	189.2	133.8	202.6	1.52824	0.000177966	0.00371081	Up
KRT18	80.8	503.9	128.4	231.7	3551.8	4865.1	272.5	4467.7	3.7904	1.11997e-06	7.5416e-05	Up
SLC6A12	16.2	19	18.3	9.1	51.2	452	16.9	8.7	3.08273	0.00364029	0.0333479	Up
TRPV4	0	10.1	3.7	11.1	108.8	61.9	22.9	52.8	3.05001	2.766e-05	0.000879859	Up
FOXM1	10.8	16.5	23.8	19.1	634	200.9	18.6	72.2	3.69323	3.04422e-05	0.000948955	Up
SH2B3	290.8	248.1	181.5	222.6	662.8	437.5	375.7	570.3	1.13117	5.13887e-05	0.00143474	Up
SCNN1A	16.2	58.2	91.7	52.4	1346.9	6636.8	65	227.3	5.22884	6.7441e-07	5.22411e-05	Up
OAS3	350	291.2	320.9	384.8	2042	1082.4	365.9	437.9	1.54493	0.00406274	0.0361119	Up
OAS2	140	81.7	22	70.5	730.5	535	108.1	242.7	2.39072	0.000340409	0.0060235	Up
RASAL1	0	1.9	9.2	0	378.2	188.5	2.2	15.4	5.6739	7.31602e-05	0.00185042	Up
ARHGDIB	269.2	300.7	210.9	229.7	946.9	699.5	349	795	1.46584	2.71477e-05	0.000867111	Up
RERGL	683.9	106.3	67.8	52.4	2.4	12.4	65	2.7	-3.45115	0.00161658	0.0188077	Down
VDR	10.8	11.4	12.8	14.1	190	1021.9	71	272.8	4.96982	8.70564e-11	4.46449e-08	Up
FZD10	21.5	46.8	7.3	15.1	191.7	73.5	213.5	14.7	2.4149	0.00372394	0.0339057	Up
GAPDH	10360.6	11194.3	13600.2	10674	33738.5	34836.8	10908.2	22336	1.15162	0.00225568	0.0237075	Up
TPI1	2283.2	2470.7	2392.9	2484.2	8410.5	6076.3	2423	4949.1	1.18219	0.00133798	0.0167301	Up
ENO2	166.9	264	163.2	166.2	648.1	599.8	225.5	411.2	1.2999	0.000998953	0.0134418	Up
PTPN6	86.2	84.2	49.5	82.6	545.2	762.1	119.6	316.3	2.52986	3.57346e-06	0.000185843	Up
GCNT2	21.5	20.3	9.2	10.1	35.9	324.6	19.7	64.9	2.89572	0.000915753	0.0127183	Up
NEDD9	64.6	95.6	89.8	61.4	435.8	371.2	159.5	814.4	2.50334	4.37825e-07	3.70338e-05	Up
E2F3	48.5	54.4	11	23.2	363.5	224.2	32.2	97.6	2.40243	0.00148836	0.0179052	Up
COL9A1	0	0	0	0	21.8	11.6	1.1	4.7	5.07067	0.0034599	0.0322114	Up
CRYBG1	96.9	58.9	100.9	65.5	146.4	797	103.2	247.4	2.0187	0.00154903	0.0183094	Up
VNN2	0	16.5	5.5	13.1	18.8	40.8	34.4	66.9	1.96741	0.00508842	0.042191	Up
PERP	96.9	131	232.9	80.6	320	1968.9	205.9	379.8	2.40511	0.000759132	0.0110358	Up
ARFGEF3	16.2	14.6	9.2	16.1	91.8	310.8	18	80.9	3.16953	5.63227e-05	0.00152101	Up
EPM2A	150.8	94.3	84.3	89.7	26.5	24.7	53.5	66.9	-1.25739	0.00454076	0.0388668	Down
SLC39A7	1028.5	876.1	1015.8	958	3540.7	3954.5	892.9	2013.9	1.42391	0.00125679	0.0159587	Up
CCND3	560	596.9	564.8	407	1687.4	2756.5	528.1	718.1	1.41896	0.00562701	0.0452108	Up
GMDS	80.8	89.3	124.7	110.8	425.8	513.9	100.5	466.7	1.88514	0.000156948	0.00335809	Up
VEGFA	226.2	294.4	128.4	292.1	9484.5	1399	406.3	971.5	3.70227	6.70666e-06	0.000289783	Up
TTK	0	1.3	0	5	87.6	21.1	3.3	6	3.92008	0.00368764	0.0336372	Up
CLIC5	21.5	18.4	12.8	22.2	308.8	2838.7	15.8	167.2	5.48014	3.22715e-07	2.85218e-05	Up
LY86	5.4	10.1	20.2	9.1	40	48	28.9	30.1	1.66328	0.000992019	0.01336	Up
KIF20A	0	3.8	5.5	3	552.9	110.6	6	39.4	5.69337	1.18145e-06	7.79025e-05	Up
HBEGF	5.4	52.5	5.5	28.2	313.5	154.3	222.8	107	3.00644	1.38228e-05	0.000519357	Up
SPARC	8142	11919.1	8146.9	9178.1	31495.3	13633.8	11834.4	79973.1	1.87284	0.00127254	0.0160668	Up
CLINT1	414.6	376	394.2	380.8	853.4	1746.2	413.9	713.4	1.25234	0.00356341	0.032837	Up
THBS4	64.6	106.3	100.9	63.5	68.8	213.3	214.1	2409	3.11027	0.000591915	0.00922569	Up
CDH6	59.2	16.5	16.5	22.2	601.7	220.5	44.8	28.1	3.03729	0.000690973	0.0103149	Up
ST8SIA4	26.9	10.8	5.5	17.1	106.5	30.6	28.4	36.8	1.86089	0.00610081	0.0480576	Up
WWC1	21.5	32.3	18.3	33.2	1799.1	1193.7	33.3	592.4	5.08125	1.71173e-09	6.05137e-07	Up
H2AFY	608.5	691.3	680.3	697.1	2545.5	2747.7	681	1087.2	1.39812	0.00195155	0.0214167	Up
ERGIC1	1556.2	1692.7	1716.3	2013.7	4071.7	6927.2	1738.8	3833.9	1.24693	0.0017888	0.0201922	Up
STC2	16.2	34.2	14.7	2	575.8	163	17.5	138.4	3.72322	0.000118375	0.00268414	Up
UNC5A	10.8	19.6	3.7	6	122.9	348.7	13.7	86.9	3.80262	2.74382e-05	0.000874591	Up
HGD	0	0.6	1.8	0	3.5	54.6	0.5	72.9	5.4398	0.000621268	0.00958713	Up
CD86	21.5	23.4	7.3	9.1	92.9	63.3	51.9	72.9	2.22311	9.6729e-06	0.000391828	Up
PCCB	253.1	220.9	220	199.5	918.1	623.1	235.4	454	1.32491	0.00144307	0.0175922	Up
COL7A1	113.1	106.3	89.8	194.4	337	378.5	179.7	310.2	1.24662	0.000848984	0.0120602	Up
ECT2	21.5	22.2	16.5	6	226.4	80.1	16.9	56.2	2.55036	0.00132451	0.0166017	Up
CYB561D2	53.8	98.8	86.2	98.7	261.7	229.3	92.8	170.5	1.12443	0.00547904	0.0442965	Up
AADAC	0	0	0	1	11.8	64.8	0	14	5.46295	0.00310886	0.029814	Up
VIPR1	5.4	11.4	7.3	5	13.5	156.5	2.7	296.9	3.96727	0.000437431	0.00732426	Up
TNNC1	5.4	4.4	0	1	124.1	38.6	2.2	35.4	4.3416	0.00032878	0.00589871	Up
SLC4A3	1825.5	1904.8	2572.6	1754.8	218.2	580.1	1292.6	769.6	-1.4941	0.00204913	0.0221502	Down
CCL20	0	0	0	0	28.2	8.7	3.8	4.7	5.28693	0.000977855	0.0132151	Up
STEAP3	53.8	201.9	181.5	147.1	539.3	299.2	203.1	544.3	1.413	0.00304327	0.0295277	Up
TFCP2L1	5.4	3.2	3.7	2	72.3	71.3	6	30.8	3.8158	4.31938e-05	0.00125117	Up
TP53I3	59.2	132.3	86.2	104.8	601.1	200.9	174.7	526.9	1.94882	9.55133e-05	0.00231059	Up
ITGB6	0	0	1.8	0	67	35.7	2.7	44.1	6.2346	9.09677e-06	0.000370419	Up
GRB14	59.2	26.6	38.5	26.2	2.9	12.4	15.8	2.7	-2.10058	0.00310562	0.0298013	Down
LOXL3	48.5	106.3	58.7	70.5	200.6	208.2	95	158.5	1.1739	0.00296492	0.0289982	Up
TACR1	16.2	21.5	16.5	3	140	243.1	19.1	24.1	2.90854	0.00135286	0.0168755	Up
EVA1A	10.8	10.1	9.2	3	85.9	134.7	12.6	21.4	2.99537	0.000539854	0.00858633	Up
HSPE1	231.6	322.8	291.5	331.4	749.9	863.3	440.7	324.9	1.00585	0.00588758	0.0467968	Up
IL1R1	263.9	436.8	264	348.5	973.4	1366.2	1193.8	3795.1	2.47472	1.91437e-07	1.86986e-05	Up
IL1RL2	0	1.9	1.8	3	25.3	32.8	4.9	24.7	3.40965	0.000412257	0.00697785	Up
SLC9A2	0	0.6	0	0	37.6	41.5	0.5	20.7	5.76657	0.000235159	0.00459534	Up
PLEKHB2	446.9	443.1	364.9	353.6	1492.1	1399.7	493.7	863.9	1.40363	0.000202329	0.00410866	Up
QPCT	10.8	8.9	5.5	15.1	111.7	72.8	9.3	39.4	2.5278	0.00139749	0.0172114	Up
SDC1	75.4	63.3	53.2	71.5	907.5	1131.8	93.4	760.2	3.46325	2.97064e-08	4.96863e-06	Up
KYNU	0	4.4	3.7	1	24.7	22.6	5.5	16.7	2.66775	0.0044944	0.038504	Up
PNO1	91.5	63.9	53.2	72.5	294.7	240.9	89	107.6	1.4033	0.00297538	0.0290716	Up
PLEK	59.2	47.5	36.7	50.4	341.7	144.1	122.3	135.1	1.96136	1.00518e-05	0.000404021	Up
ARID3A	64.6	48.7	33	42.3	285.8	112.8	92.3	93.6	1.66562	0.000726385	0.0106896	Up
VAX2	16.2	12	7.3	3	32.3	98.3	13.7	28.8	2.27018	0.00459066	0.039149	Up
ATP6V1B1	10.8	17.1	12.8	6	2156.7	10115.3	11.5	32.8	8.03646	4.38936e-07	3.70338e-05	Up
SPR	193.9	167.7	247.5	183.3	1253.9	546.6	200.4	331.6	1.55867	0.00400725	0.0357208	Up
EPHA4	344.6	284.9	397.9	324.4	74.7	163.8	195.5	40.8	-1.50785	0.00199161	0.0217096	Down
DHCR24	269.2	305.1	408.9	390.9	8112.3	11814.1	403.6	1310.5	3.9759	7.75115e-07	5.71417e-05	Up
ICMT	484.6	525.4	540.9	438.2	1277.5	1227.9	504.6	1034.4	1.02317	0.0018267	0.0205602	Up
KIAA1324	16.2	16.5	22	10.1	40	330.5	9.8	682.7	4.04486	5.13666e-05	0.00143474	Up
FBXO2	26.9	46.8	170.5	70.5	324.1	1560.6	55.2	85.6	2.67689	0.00492395	0.0411564	Up
NCF2	26.9	54.4	18.3	32.2	212.9	59	65.5	121	1.75474	0.00210011	0.0225446	Up
AMPD1	10.8	3.2	12.8	10.1	0	0	0	0	-6.2786	5.1468e-05	0.00143474	Down
AGMAT	5.4	1.9	0	3	97.6	34.2	4.9	109	4.81048	1.01382e-05	0.000404359	Up
OLFML3	3047.9	3325.9	3733.3	3162.1	891.6	1005.2	2701	1260.4	-1.17959	0.00214861	0.0228983	Down
MYCL	16.2	3.2	12.8	3	365.2	77.9	3.8	62.9	3.99907	0.000222482	0.00439733	Up
ST6GALNAC5	86.2	124.7	119.2	96.7	1061	699.5	113	60.2	2.17533	0.00478199	0.0402946	Up
PADI2	0	4.4	1.8	2	99.4	626.7	4.4	28.8	6.26117	1.26002e-06	8.17439e-05	Up
RGS4	32.3	27.9	9.2	39.3	117.6	74.2	193.3	324.3	2.70981	5.31336e-06	0.00024598	Up
IGSF21	5.4	7.6	20.2	10.1	63.5	33.5	36	33.4	1.91525	0.000469174	0.00769831	Up
GALE	64.6	67.1	77	82.6	723.4	239.5	95.6	335	2.25227	6.88799e-05	0.00176803	Up
SLC2A1	274.6	309.5	315.4	259.9	10731.3	1840.1	257.2	268.1	3.49744	0.000243713	0.00472688	Up
CDC20	16.2	22.8	12.8	6	957.5	101.9	10.9	49.5	4.27787	7.6949e-05	0.00192744	Up
ATP6V0B	506.2	584.9	454.7	377.8	2335.5	2191.6	646	791.6	1.63296	0.000463091	0.00762263	Up
PIK3R3	150.8	132.3	82.5	76.6	266.4	1154.4	100.5	291.5	2.04434	0.00246974	0.0253076	Up
TSPAN1	16.2	8.9	16.5	10.1	140	1054	15.3	1228.3	5.60052	1.24421e-08	2.48125e-06	Up
FAAH	70	62.7	23.8	80.6	343.5	394.5	56.8	171.2	2.02884	0.00119947	0.0153598	Up
IRF6	37.7	23.4	49.5	7.1	392.3	410.5	54.6	182.5	3.18576	1.09081e-05	0.000428472	Up
PLPPR4	0	0.6	0	0	75.9	9.5	1.1	3.3	5.61125	0.00119054	0.0152796	Up
RCAN3	26.9	26.6	20.2	21.2	130	112.1	22.4	63.5	1.80052	0.00237552	0.0246177	Up
NEK2	0	3.2	1.8	0	94.7	36.4	1.6	14	4.53983	0.000830082	0.0118676	Up
RPS6KA1	64.6	72.8	62.3	70.5	936.3	401.8	96.1	390.5	2.75096	3.14109e-06	0.000167902	Up
CENPF	43.1	22.2	18.3	27.2	359.9	93.2	19.7	50.8	2.28086	0.00501584	0.0417226	Up
RCN2	333.9	380.4	322.7	329.4	796.9	2234.6	405.7	589.1	1.55805	0.00257781	0.0261735	Up
MUC5B	0	0.6	22	2	729.3	200.2	6	12.7	5.2373	0.000189637	0.00389157	Up
CTSD	2870.2	2927.1	3306.1	3077.5	11303	9506.8	3289.7	7672.4	1.38298	0.00020485	0.00414361	Up
TNNT2	5.4	1.3	0	3	12.9	21.8	1.6	171.2	4.69427	0.000534547	0.00852808	Up
MREG	16.2	5.1	20.2	10.1	97	220.5	11.5	12	2.78028	0.00411748	0.0363699	Up
ATP10B	5.4	0	0	0	50	53.9	0	398.5	7.86048	0.00305773	0.0295663	Up
MYB	10.8	1.3	0	0	38.8	26.9	2.7	54.2	4.24952	0.00145348	0.0176607	Up
ZNF430	156.2	99.4	82.5	99.7	35.9	26.9	62.8	40.1	-1.36166	0.000354745	0.00622104	Down
VAMP8	91.5	47.5	55	48.4	1008.1	1471	103.8	320.3	3.60825	2.73432e-07	2.48727e-05	Up
ELL2	70	68.4	60.5	68.5	97.6	100.4	250.7	146.4	1.15814	0.00382271	0.0344909	Up
PIGZ	5.4	10.1	7.3	10.1	70.6	53.9	20.8	65.5	2.57126	1.59187e-05	0.000578541	Up
NEK6	236.9	350.7	243.9	297.2	1837.4	514.6	507.9	694.7	1.64989	0.000434209	0.00729387	Up
BSPRY	0	1.3	1.8	2	437	147	2.2	89.6	6.77809	7.7762e-08	9.52432e-06	Up
SLC46A2	0	0.6	0	0	11.2	42.9	2.7	14	5.25845	0.000323494	0.00586475	Up
GALNT12	5.4	6.3	5.5	9.1	85.9	225.6	11.5	155.8	4.14181	8.55576e-07	6.19e-05	Up
CSF3R	32.3	32.3	12.8	34.3	151.7	122.3	78.1	83.6	1.95761	6.81433e-06	0.0002912	Up
ZC2HC1C	10.8	7.6	3.7	5	22.9	42.2	13.1	16	1.90114	0.00610182	0.0480576	Up
EPCAM	0	24.7	40.3	20.1	3463.6	4138.7	53.5	1473.6	6.6913	1.82291e-11	1.47555e-08	Up
PPP1R3C	274.6	132.3	280.5	197.4	17.6	82.2	67.2	72.2	-1.87891	0.000182818	0.00378155	Down
HOXB5	0	0.6	1.8	0	14.7	324.6	0	33.4	6.92511	7.87486e-05	0.00196303	Up
HOXB3	26.9	24.7	22	8.1	118.8	1273.1	11.5	70.2	4.19243	0.000100509	0.00237905	Up
PLEKHG1	86.2	154.5	66	160.2	330	505.1	252.8	377.8	1.62002	3.22842e-05	0.00099837	Up
CXorf21	5.4	2.5	1.8	4	24.7	10.9	12.6	10.7	2.24093	0.00475246	0.0400675	Up
CYSTM1	172.3	161.4	143	140	400.5	494.2	235.9	988.2	1.78497	5.72696e-05	0.00153591	Up
KCNJ5	37.7	39.2	22	37.3	66.5	83.7	85.7	113.7	1.35091	0.00013803	0.00303257	Up
DNAJC15	53.8	29.8	45.8	22.2	62.9	169.6	98.3	113.7	1.63032	0.00036839	0.00638685	Up
TGFBI	328.5	299.4	253	275	3434.2	853.8	582.7	2633	2.70055	7.28933e-07	5.49029e-05	Up
PLS1	10.8	5.1	1.8	2	80	96.8	6.6	252.7	4.69604	3.17927e-06	0.000169361	Up
DUSP4	10.8	15.2	9.2	13.1	246.4	61.1	47.5	69.5	3.0985	3.44129e-06	0.000180233	Up
TNFRSF8	5.4	5.1	7.3	12.1	95.3	14.6	24.6	101.6	2.93815	0.000250759	0.00482241	Up
LYPLA1	86.2	101.3	86.2	78.6	252.3	328.3	108.7	147.1	1.24293	0.00256035	0.0260303	Up
RDH10	53.8	55.7	60.5	63.5	90.6	395.2	148	177.2	1.78886	0.000243221	0.00472323	Up
NCAPH	21.5	3.8	0	5	204.1	29.1	7.6	18.7	3.33353	0.00486289	0.0407995	Up
MND1	0	1.9	0	0	27.1	8.7	3.8	8	3.82813	0.00619981	0.048437	Up
CCRL2	0	5.1	3.7	7.1	30	17.5	7.6	45.5	2.42597	0.00392681	0.0351649	Up
LIAS	156.2	144.3	223.7	152.1	35.3	59	110.3	86.9	-1.21289	0.00311228	0.0298268	Down
TMEM54	107.7	256.4	335.6	263.9	619.9	480.4	344	693.4	1.12976	0.00342984	0.0320704	Up
CSMD2	0	3.8	0	0	117	223.5	8.2	23.4	6.05258	7.03828e-06	0.000297391	Up
TMIGD3	0	0	0	0	35.9	2.2	5.5	6	5.41162	0.00159516	0.0186702	Up
CXCR4	48.5	128.5	44	89.7	1079.8	714.8	178.6	651.2	3.04885	1.0298e-07	1.15101e-05	Up
XPNPEP2	5.4	3.2	3.7	4	1.2	12.4	18	125.7	3.33727	0.00514784	0.0425251	Up
SASH3	32.3	81.7	29.3	70.5	342.3	131	63.3	175.8	1.69653	0.00413833	0.0364989	Up
PTGFR	183.1	43.7	91.7	66.5	8.2	7.3	21.3	28.1	-2.52535	5.6563e-05	0.00152221	Down
PLAU	26.9	41.1	18.3	30.2	1485.1	177.6	139.8	440	4.2476	8.65197e-09	1.77081e-06	Up
SRGN	236.9	163.3	93.5	120.9	669.3	228.6	417.2	288.2	1.40641	0.0015088	0.0180533	Up
ZWINT	5.4	33.5	22	22.2	307	109.2	19.7	77.6	2.55244	0.00133685	0.0167294	Up
BHLHE41	156.2	228.5	205.4	199.5	594.6	1555.5	241.9	226.7	1.7249	0.00445922	0.0383222	Up
ARHGAP9	16.2	40.5	14.7	34.3	136.5	69.9	59.5	86.9	1.64729	0.000837685	0.0119338	Up
NCKAP1L	134.6	73.4	56.8	76.6	445.2	291.2	142.5	246.1	1.7656	5.03151e-05	0.00141484	Up
ORMDL2	64.6	113.9	117.4	95.7	305.2	376.3	135.4	182.5	1.32541	0.00118028	0.0151854	Up
IKZF4	280	267.1	352.1	260.9	71.2	108.5	220.1	110.3	-1.1838	0.00217189	0.0230763	Down
HJURP	5.4	5.7	1.8	0	385.2	63.3	6.6	25.4	5.29908	2.89422e-05	0.000911327	Up
COL10A1	5.4	17.1	12.8	26.2	431.7	64.1	145.3	324.9	3.86833	7.10376e-09	1.64216e-06	Up
PLP1	226.2	86.7	71.5	34.3	5.3	7.3	6.6	16.7	-3.50931	1.28538e-07	1.36014e-05	Down
ACVR1C	32.3	13.3	49.5	13.1	1.2	10.9	4.4	4.7	-2.33172	0.00393962	0.035247	Down
SLC36A1	64.6	76	91.7	82.6	154.1	116.5	116.9	277.5	1.06325	0.00572868	0.0457491	Up
G0S2	543.9	676.7	661.9	389.8	221.7	73.5	344	198.6	-1.43873	0.00161245	0.0187877	Down
CKS2	21.5	40.5	20.2	25.2	369.4	119.4	55.7	74.9	2.494	0.000171422	0.00360717	Up
CTCFL	0	0	0	0	44.7	81.5	1.6	0.7	6.78416	0.000315921	0.00578135	Up
PI3	0	0.6	0	0	374.1	31.3	3.3	20.7	7.86585	1.16694e-06	7.75716e-05	Up
SLPI	26.9	27.9	42.2	57.4	5278.6	5605.4	65	167.8	6.161	3.98907e-09	1.0886e-06	Up
PREX1	226.2	222.2	196.2	166.2	674.6	762.8	295.4	441.3	1.42849	5.27152e-05	0.00145905	Up
KCNS1	0	1.3	0	1	39.4	17.5	2.2	8	4.22327	0.00172795	0.0197055	Up
SDC4	263.9	432.4	357.6	330.4	1422.1	1687.2	421	672.6	1.59678	0.000493499	0.00800456	Up
SNAI1	21.5	20.9	29.3	12.1	78.8	40.8	39.9	69.5	1.48163	0.00189261	0.020985	Up
KCNK15	21.5	63.3	86.2	54.4	1185.1	2778.3	139.8	270.8	4.25769	1.94167e-07	1.87595e-05	Up
PCK1	10.8	13.3	14.7	17.1	52.3	2127.6	29.5	546.3	5.60598	8.90996e-08	1.08277e-05	Up
PAIP2B	296.2	351.3	388.7	275	101.2	117.2	233.2	108.3	-1.2288	0.000454903	0.0075214	Down
POF1B	0	0.6	1.8	2	6.5	17.5	2.7	86.9	4.4112	0.000875203	0.0122868	Up
HIF3A	323.1	327.9	265.9	121.9	94.1	16.7	117.4	12.7	-2.10277	0.0032736	0.0309838	Down
F13A1	350	291.8	166.9	359.6	806.9	544.5	1366.3	2154.3	2.06283	1.22383e-05	0.000468883	Up
GRM4	0	0	3.7	8.1	41.8	195.8	2.7	2.7	4.25585	0.00508674	0.042191	Up
PACSIN1	5.4	5.1	18.3	12.1	50	299.2	3.8	12	3.1356	0.00563491	0.0452276	Up
UNC5CL	10.8	17.1	25.7	29.2	20	128.1	26.2	214	2.19014	0.00590796	0.0469348	Up
SPDEF	0	1.9	3.7	1	168.2	1835.7	5.5	37.4	8.10805	1.22893e-06	8.03193e-05	Up
TREM1	0	0	0	8.1	198.8	9.5	25.1	18.1	4.74391	0.00118146	0.0151881	Up
SLC35B3	64.6	82.9	45.8	64.5	182.9	163	85.7	112.3	1.06175	0.00462642	0.0393363	Up
RAB17	64.6	26	27.5	7.1	128.2	544.5	10.9	135.1	2.76817	0.00345628	0.0322114	Up
SH3TC1	102.3	110.8	73.3	74.5	325.2	141.2	116.9	327	1.3396	0.00245864	0.0252604	Up
MT1G	0	3.2	0	2	138.8	56	2.2	1600	8.09998	1.19623e-05	0.000459439	Up
MT2A	468.5	576	313.6	325.4	938.1	874.2	2051.7	1614.1	1.70305	6.91205e-06	0.000293762	Up
EFNB2	145.4	220.3	108.2	142	1951.5	138.3	552.6	315.6	2.26086	0.00139517	0.0171973	Up
SOX9	10.8	8.9	7.3	2	469.3	395.2	1.6	270.1	5.35948	9.50478e-07	6.72031e-05	Up
OPRL1	10.8	16.5	5.5	22.2	174.7	46.6	27.3	30.8	2.29336	0.00306342	0.0295733	Up
IL1B	0	10.8	1.8	10.1	200.6	70.6	38.8	37.4	3.68725	1.32482e-05	0.000503853	Up
PAX8	48.5	41.8	36.7	12.1	2554.9	1454.3	76.5	4	4.89127	3.32766e-05	0.00101893	Up
PSD4	129.2	59.5	64.2	91.7	965.2	412.7	101.6	387.8	2.46065	5.59123e-05	0.00151783	Up
C3	1917	3153.7	1083.7	2261.5	13320.4	8911.4	23729.9	8415.3	2.69095	2.10232e-09	6.70264e-07	Up
SH2D3A	0	8.9	7.3	8.1	577.6	430.9	14.2	141.7	5.42119	1.49991e-08	2.7775e-06	Up
TNFSF14	10.8	8.2	1.8	18.1	54.7	33.5	94.5	60.2	2.61325	4.73406e-05	0.00134376	Up
CD93	603.1	362.7	212.7	282.1	798.1	550.3	868.3	1705	1.43695	0.00158401	0.0185537	Up
OVOL2	0	3.8	0	1	316.4	176.1	0.5	34.8	6.34583	1.40691e-05	0.000524807	Up
BPIFB1	0	0	0	0	10	14.6	0	125.7	7.00986	0.00067336	0.010166	Up
MCF2L	140	98.1	77	91.7	317.6	170.3	103.8	334.3	1.2102	0.00631465	0.0490387	Up
IGFLR1	16.2	27.2	27.5	17.1	153.5	50.2	45.9	50.8	1.73641	0.00216034	0.022985	Up
HCST	10.8	19.6	16.5	13.1	77.6	47.3	28.9	87.6	1.94437	0.000246946	0.00477172	Up
FRMD8	317.7	355.1	328.2	377.8	1853.3	975.4	299.8	625.2	1.4432	0.00433019	0.0377244	Up
PRRG2	5.4	6.3	0	1	180	134.7	5.5	21.4	4.78634	5.4717e-05	0.0014932	Up
IFI6	608.5	698.9	493.3	623.6	6143.8	2582.5	923.4	1181.5	2.15927	0.000139639	0.00304639	Up
DLGAP5	0	0	1.8	0	113.5	6.6	2.2	12.7	6.05512	0.00023199	0.00455632	Up
HSPA2	118.5	151.3	69.7	89.7	311.7	295.5	89	488.8	1.46457	0.00485622	0.0407655	Up
EVI2A	10.8	12	0	10.1	35.9	22.6	31.7	45.5	2.01674	0.00258614	0.0262068	Up
FAM78A	59.2	72.8	29.3	44.3	180	96.8	63.9	175.8	1.32769	0.00571805	0.0457365	Up
EDN2	0	2.5	0	1	71.2	4.4	3.3	20.1	4.27321	0.00202272	0.0219717	Up
PLAAT1	0	1.3	0	0	18.8	29.8	2.7	20.1	4.7693	0.000482725	0.00787085	Up
ADGRE2	0	3.2	1.8	1	76.5	21.8	32.8	18.1	4.26734	4.62343e-06	0.000224742	Up
PKMYT1	0	3.2	5.5	0	265.8	67	4.4	26.1	5.25449	4.59386e-05	0.00131356	Up
TUBA4A	134.6	126	113.7	121.9	1663.3	942.6	334.2	223.3	2.67495	5.99036e-06	0.000267381	Up
PNKD	350	356.4	418.1	414	1349.8	1875	385.5	581.7	1.44483	0.00310218	0.0297866	Up
STEAP4	21.5	18.4	5.5	7.1	27.1	119.4	56.8	37.4	2.27125	0.000956179	0.0130069	Up
SRD5A3	43.1	48.1	64.2	53.4	381.7	460	65	143.1	2.32126	0.000103841	0.00244364	Up
ADM2	5.4	1.9	1.8	1	39.4	29.1	1.1	33.4	3.68326	0.00134404	0.0167789	Up
SDF2L1	59.2	112	190.7	162.2	734	676.2	137.1	283.5	1.78899	0.00197492	0.021573	Up
MGAT3	53.8	181.7	58.7	80.6	496.4	782.5	52.4	340.3	2.13826	0.0028344	0.0280465	Up
A4GALT	91.5	58.2	45.8	52.4	151.2	414.2	62.3	157.8	1.69232	0.00326284	0.0309095	Up
MCHR1	134.6	415.9	122.9	114.8	17.1	10.2	37.7	35.4	-2.98161	7.38572e-07	5.52331e-05	Down
LIF	5.4	39.9	9.2	26.2	681.1	149.9	175.3	96.3	3.67515	1.41283e-06	8.89737e-05	Up
APOBEC3F	242.3	231.1	253	201.5	37.6	88.8	156.2	84.9	-1.33281	0.0018365	0.0206407	Down
IRF5	53.8	22.8	14.7	36.3	170.6	214.7	25.7	86.3	2.01887	0.00305454	0.0295663	Up
WDFY4	21.5	70.9	14.7	29.2	162.9	101.9	65	107.6	1.61175	0.00437055	0.0378952	Up
MYO5C	102.3	54.4	33	50.4	311.7	313	43.7	171.2	1.84523	0.00301248	0.0293423	Up
ALDH1A2	732.3	274.7	430.9	274	142.3	18.2	159.5	58.2	-2.16994	0.000673053	0.010166	Down
CHAC1	0	11.4	3.7	4	143.5	79.3	5.5	26.7	3.52734	0.000652832	0.0099265	Up
LOXL1	172.3	310.2	251.2	173.3	1189.2	837.1	484.9	5072.2	3.05978	5.5379e-06	0.000251784	Up
PIMREG	0	6.3	5.5	4	137.6	24.7	9.3	24.7	3.43698	0.000509356	0.00819341	Up
CD68	312.3	269	185.2	261.9	2021.5	679.1	524.2	1295.8	2.14056	2.52779e-06	0.000143503	Up
SLC44A2	775.4	849.5	795.8	758.5	2674.3	1926.7	703.9	1674.2	1.13389	0.00357782	0.0329113	Up
AP1M2	10.8	8.9	20.2	1	1316.3	836.3	5.5	270.8	5.92682	1.60427e-07	1.64174e-05	Up
KLK8	0	1.3	1.8	4	849.9	1530	1.6	8	8.19738	5.9991e-06	0.000267381	Up
RIPK3	16.2	7.6	3.7	7.1	88.8	126.7	7.1	63.5	3.19091	0.000169513	0.00358258	Up
EGLN3	21.5	22.8	11	14.1	933.4	136.1	31.7	203.9	4.2444	8.37757e-07	6.08939e-05	Up
FOXJ1	16.2	39.2	36.7	11.1	681.1	305	10.4	14	3.27586	0.00247872	0.0253821	Up
RHBDF2	166.9	151.9	135.7	137	907.5	451.3	176.4	338.3	1.66796	0.000552071	0.0087271	Up
MAP7D3	350	229.2	284.2	148.1	67.6	59	125.1	103	-1.49323	0.000114041	0.00260917	Down
KLF16	123.9	177.9	93.5	99.7	323.5	216.9	408.5	270.8	1.29175	0.000142609	0.00310589	Up
TMEM8A	258.5	377.3	298.9	226.7	1640.3	1008.1	348.4	780.9	1.69843	0.000219567	0.00437307	Up
GDPD2	0	0	0	0	21.2	64.8	0	16.7	6.45974	0.00107591	0.0141582	Up
SAT1	613.9	743.8	403.4	592.3	3620.1	2870	1852.3	1418.1	2.05134	1.74533e-08	3.15682e-06	Up
THEM6	210	195.6	188.9	188.4	3373	3250	121.8	327	3.176	0.000138483	0.00303824	Up
NECTIN2	522.3	719.1	441.9	449.3	3336.6	1829.9	887.4	1823.3	1.88355	5.37993e-06	0.000246858	Up
PLVAP	37.7	131.7	51.3	46.3	692.3	155	54.6	215.3	2.04154	0.00585272	0.0465435	Up
ARPC1B	915.4	611.5	430.9	501.7	2662.5	2281.9	847	2303.4	1.72513	3.13318e-05	0.000970849	Up
GDF15	32.3	43	36.7	40.3	155.3	32	172	500.8	2.4844	0.000362806	0.00631258	Up
TRPM4	107.7	86.7	42.2	43.3	512.3	810.1	92.3	590.4	2.86429	3.93513e-06	0.000198094	Up
CRB3	10.8	2.5	0	5	547	282.4	5.5	76.9	5.86541	4.94317e-07	4.04689e-05	Up
HELZ2	403.9	446.3	286	388.8	2036.8	958.6	499.1	631.2	1.43571	0.00190364	0.0210306	Up
SAMD10	5.4	10.1	1.8	15.1	554	367.6	6.6	53.5	4.85052	7.72559e-06	0.000321314	Up
LSP1	91.5	72.8	53.2	138	727	147	74.3	347.7	1.86472	0.00539238	0.0438695	Up
CEP85	53.8	56.3	25.7	72.5	258.8	253.3	97.2	80.2	1.71752	0.00131607	0.0165226	Up
RBBP8NL	0	0	1.8	1	86.5	171.8	0	19.4	6.35197	0.000134389	0.00297781	Up
LAMA5	1346.2	739.4	507.9	555.1	6593.7	7045.1	626.9	1151.4	2.29433	0.00147984	0.0178442	Up
ASS1	651.6	704.5	689.5	887.5	5992.6	6937.4	918.5	2907.8	2.51331	3.77566e-06	0.000192559	Up
FIBCD1	0	0.6	0	0	64.1	141.9	11.5	89.6	7.36919	7.94734e-09	1.69344e-06	Up
ARHGEF16	21.5	53.8	29.3	23.2	422.3	309.3	19.7	456.7	3.21006	3.45499e-05	0.00104557	Up
SMPDL3B	0	2.5	11	4	437	164.5	6.6	119	5.28376	6.28525e-07	4.93773e-05	Up
THEMIS2	53.8	65.8	14.7	38.3	1006.3	334.1	159.5	137.7	3.24904	4.74904e-06	0.000227998	Up
HIP1R	140	258.3	150.4	162.2	456.4	376.3	198.8	466.7	1.05823	0.00434993	0.0377796	Up
PNCK	10.8	0.6	1.8	9.1	31.2	87.3	3.8	139.1	3.70989	0.000871223	0.0122641	Up
CASZ1	48.5	65.2	33	52.4	294.1	329	30	230	2.13997	0.000965939	0.0130996	Up
EPS8L1	0	10.8	20.2	25.2	2200.8	1805.1	25.1	104.3	6.13942	5.54206e-08	7.56199e-06	Up
LILRB2	16.2	20.9	9.2	19.1	99.4	43.7	53.5	103.6	2.15669	2.04344e-05	0.000713448	Up
F12	0	0.6	0	0	32.9	16	2.7	27.4	5.4173	0.000109542	0.00253561	Up
PRR7	0	19.6	16.5	7.1	460.5	164.5	24.6	42.8	3.8938	5.04567e-05	0.00141484	Up
TOP2A	5.4	8.2	11	2	420.5	146.3	21.3	101	4.68686	1.50736e-07	1.55278e-05	Up
PPP1R1B	150.8	43	69.7	75.6	12.9	6100.3	29.5	940.7	4.39159	0.00334165	0.0314075	Up
ZNF132	134.6	76	199.9	129.9	54.1	72.8	63.9	71.5	-1.03098	0.00430586	0.0375856	Down
RHPN2	16.2	44.9	64.2	49.4	1255.7	228.6	69.4	160.5	3.26893	6.87456e-05	0.0017675	Up
PODNL1	10.8	43.7	34.8	40.3	259.4	177.6	46.4	366.4	2.64786	3.34577e-05	0.00102247	Up
ZSWIM4	107.7	130.4	104.5	96.7	494	345.7	160	223.3	1.47309	0.000259393	0.00493863	Up
FBXW9	64.6	81	78.8	96.7	548.2	275.1	69.9	143.8	1.68042	0.00459991	0.0391849	Up
MATN3	5.4	7.6	5.5	4	40.6	39.3	13.7	135.7	3.32012	5.69808e-05	0.0015308	Up
NUP210	64.6	105.7	42.2	89.7	1983.2	1340	87.4	157.1	3.55382	2.46988e-05	0.000815689	Up
PTPRE	43.1	81.7	14.7	56.4	206.4	128.1	84.6	201.9	1.63262	0.00268944	0.0269377	Up
CARD6	48.5	54.4	47.7	46.3	70.6	139	75.9	143.8	1.11569	0.00327665	0.0309838	Up
JCHAIN	414.6	158.9	218.2	475.5	27.1	11.6	157.8	6	-2.64087	0.0027004	0.0270061	Down
ITGB4	210	231.1	133.9	176.3	3396	5756.8	160	1554.5	3.8552	4.61477e-07	3.83644e-05	Up
TRIM47	274.6	196.9	185.2	160.2	605.2	696.6	199.9	375.8	1.21393	0.00429255	0.0375116	Up
RAB25	0	7	7.3	2	1379.8	629.6	4.4	303.6	7.00577	2.11141e-09	6.70264e-07	Up
HAPLN2	32.3	6.3	5.5	5	0	2.2	1.1	1.3	-3.25012	0.00412059	0.0363767	Down
ACY3	10.8	2.5	0	4	12.9	44.4	1.1	109.7	3.52074	0.00548226	0.0442995	Up
ALDH3B2	0	0.6	1.8	3	811.6	1340	2.7	4.7	8.38882	4.70567e-06	0.000227404	Up
TESMIN	16.2	10.1	23.8	14.1	242.9	93.2	25.7	16	2.57608	0.00230892	0.0240595	Up
VSTM2L	5.4	6.3	7.3	2	106.5	59	2.2	181.9	4.07105	9.82619e-05	0.00235511	Up
ALOX5AP	96.9	48.1	84.3	42.3	381.1	188.5	77.5	259.4	1.77744	0.000834898	0.0119255	Up
CHI3L1	10.8	16.5	14.7	23.2	1803.8	10944.3	66.1	25.4	7.60959	3.08362e-07	2.75665e-05	Up
LGR6	113.1	29.8	36.7	25.2	418.8	1535.1	15.3	20.1	3.31005	0.00333728	0.0314075	Up
SLC39A11	59.2	50	23.8	54.4	275.3	253.3	64.4	154.5	2.00885	0.000144822	0.00314184	Up
SFTPD	0	0	0	0	25.9	10.2	6	1.3	5.22021	0.00209082	0.0224867	Up
TTC9	5.4	12	9.2	2	178.2	251.1	6	75.6	4.11659	2.62194e-05	0.000846146	Up
ADAMDEC1	0	0	0	0	41.2	4.4	0.5	10.7	5.60722	0.00250841	0.0255858	Up
CD180	5.4	11.4	9.2	5	58.8	36.4	13.7	34.1	2.12769	0.0014978	0.0179775	Up
SORT1	366.2	159.5	106.4	109.8	853.4	1468.9	140.3	572.3	2.04998	0.00209227	0.0224867	Up
VTCN1	16.2	7.6	7.3	11.1	206.4	1316	8.2	27.4	5.25608	5.35882e-06	0.000246617	Up
GRHL1	0	1.9	11	0	92.3	95.4	1.6	9.4	3.90243	0.00546874	0.0442362	Up
LDHA	1163.1	1107.1	836.1	926.8	4386.4	4087	2035.3	4343.4	1.88252	5.38878e-10	2.20586e-07	Up
FST	5.4	12	3.7	11.1	29.4	56	49.7	220.6	3.36265	2.07833e-05	0.000721617	Up
IL2RA	5.4	5.1	0	0	42.9	24.7	26.2	24.1	3.60821	6.28555e-05	0.00165929	Up
CABLES1	80.8	118.4	97.2	124.9	306.4	175.4	206.4	347	1.26783	0.000107797	0.00249893	Up
DOCK2	140	58.9	60.5	50.4	294.1	192.2	107.6	187.2	1.40641	0.0019084	0.0210367	Up
EMP1	463.1	377.3	220	327.4	2225	1234.5	1146.2	756.2	1.95728	7.70967e-07	5.71066e-05	Up
CDCA8	5.4	6.3	9.2	6	435.2	65.5	4.4	30.8	4.30137	9.1113e-05	0.00221794	Up
HOOK1	0	9.5	3.7	3	82.3	114.3	6	28.8	3.60149	0.000333699	0.00597317	Up
DSC2	26.9	13.9	3.7	15.1	695.8	71.3	37.1	172.5	4.10604	4.85434e-06	0.000231623	Up
DSC3	0	1.3	0	5	57.1	6.6	8.2	44.1	3.86898	0.00108858	0.0142533	Up
DAGLA	26.9	51.9	22	58.4	127.6	357.4	57.3	91.6	1.95474	0.0023372	0.0242692	Up
TMEM165	210	199.4	168.7	203.5	891.6	814.5	276.9	522.2	1.68239	1.77777e-05	0.000634247	Up
SLC37A2	21.5	30.4	22	21.2	170	117.9	39.3	142.4	2.27809	1.53033e-05	0.000557478	Up
CEMIP2	96.9	55.1	58.7	58.4	374.7	160.1	142.5	421.9	2.07221	7.14013e-06	0.000299366	Up
HAVCR2	48.5	27.9	20.2	27.2	227.6	107	67.2	99	2.09469	2.99118e-05	0.000934292	Up
OASL	16.2	13.9	25.7	15.1	238.2	166.7	19.1	30.8	2.68721	0.00084021	0.0119574	Up
TES	113.1	135.5	36.7	89.7	868.1	559	80.3	208.6	2.19586	0.00160774	0.0187609	Up
EHF	0	15.8	16.5	3	881	831.2	4.4	102.3	5.59989	2.59113e-06	0.000146564	Up
PRRG4	10.8	7.6	3.7	3	38.8	80.8	6	31.4	2.76561	0.0016091	0.0187627	Up
TESPA1	113.1	93.7	177.9	129.9	15.9	13.8	51.9	14	-2.42103	7.03838e-06	0.000297391	Down
RDH5	26.9	11.4	14.7	12.1	47.1	220.5	11.5	88.3	2.57917	0.00157516	0.0185041	Up
TROAP	5.4	1.3	5.5	7.1	145.3	32.8	5.5	16	3.43384	0.00136415	0.0169349	Up
ESPL1	10.8	10.1	7.3	13.1	270	136.1	7.6	85.6	3.58976	3.62367e-05	0.00109025	Up
KRT7	5.4	22.2	22	31.2	4906.9	5071.8	77.5	252.7	6.95009	1.91954e-11	1.47555e-08	Up
MAP7	16.2	29.8	16.5	21.2	195.3	380	33.3	124.4	3.0918	7.4199e-06	0.000310259	Up
NHSL1	26.9	29.8	29.3	21.2	50.6	37.1	69.9	237.4	1.8831	0.00381288	0.0344421	Up
EGR4	0	3.8	0	0	16.5	13.1	78.6	6	4.35822	0.00155473	0.018361	Up
CAPN9	0	1.3	0	0	2.9	76.4	1.1	24.1	5.35165	0.00147251	0.017811	Up
NPL	32.3	23.4	18.3	29.2	95.3	57.5	59.5	86.3	1.57287	3.88751e-05	0.00114527	Up
SLC19A3	10.8	19	14.7	21.2	128.8	197.3	19.1	64.2	2.58711	0.000252288	0.00483293	Up
WNT10A	0	4.4	9.2	9.1	531.7	508.8	2.7	6	5.43887	3.92639e-05	0.00115454	Up
EDAR	0	1.9	0	4	117.6	14.6	0	46.1	4.60388	0.00343315	0.0320704	Up
LMO7	269.2	173.4	225.5	166.2	807.5	1103.5	183.5	538.9	1.66714	0.00105485	0.0139764	Up
LCP1	242.3	207.6	86.2	252.8	995.7	371.9	316.7	538.2	1.49797	0.0018987	0.0210208	Up
IL6	0	3.2	0	0	40	4.4	50.8	16.7	4.51132	0.000570736	0.00897465	Up
ABHD17C	16.2	31.7	22	7.1	182.3	266.4	33.3	107	2.91144	3.74986e-05	0.0011161	Up
MYCBPAP	37.7	36.1	55	44.3	4.1	8	27.9	8	-1.84519	0.00473396	0.0399548	Down
GALNT5	0	2.5	0	2	94.1	20.4	15.3	85.6	5.0595	1.46257e-06	9.17352e-05	Up
SKIL	86.2	100	75.2	84.6	142.3	201.6	309.6	152.4	1.2141	0.000477643	0.00781255	Up
IL10	0	7.6	1.8	0	41.2	8.7	60.6	16	3.43868	0.00270488	0.0270061	Up
IL1RN	10.8	8.9	0	4	264.1	21.8	34.4	42.8	4.02315	7.54442e-05	0.00189586	Up
HS6ST1	1147	1537.6	1602.6	1357.9	6063.2	5379.7	2095.9	1837.4	1.44458	0.000895348	0.0124907	Up
SLC31A1	96.9	181.7	135.7	150.1	398.2	358.1	186.2	255.4	1.05681	0.00210856	0.0226198	Up
CTSV	0	3.2	1.8	9.1	210.6	39.3	1.1	36.1	4.17157	0.000880769	0.0123142	Up
POLR1E	700	496.3	841.6	713.2	215.3	165.2	565.2	288.8	-1.15422	0.00614323	0.0483278	Down
CD72	16.2	12.7	9.2	9.1	68.2	29.8	27.3	33.4	1.82577	0.000931057	0.0128051	Up
ARHGEF39	5.4	7	3.7	3	123.5	19.7	2.7	17.4	3.09894	0.00454508	0.0388668	Up
TMEM63B	236.9	260.2	238.4	230.7	690.5	604.9	307.5	365.7	1.02486	0.0015774	0.0185041	Up
TUBB2A	107.7	215.9	161.4	165.2	396.4	184.2	530.8	329	1.12671	0.00384591	0.03466	Up
HMGA1	59.2	98.8	108.2	74.5	5742.7	3189.5	86.8	518.2	4.80096	1.05891e-07	1.16818e-05	Up
IER3	113.1	360.8	62.3	226.7	1086.3	222.7	1074.7	332.3	1.82067	0.00630701	0.0490387	Up
TPMT	43.1	58.9	47.7	63.5	177.6	164.5	67.2	111.7	1.25776	0.00197802	0.0215916	Up
RNF144B	53.8	27.9	29.3	24.2	531.1	252.6	47	90.9	2.81749	8.3677e-05	0.00205299	Up
FGFBP1	0	0	0	1	39.4	112.8	2.7	2.7	6.28118	0.000117906	0.0026791	Up
FHDC1	21.5	32.9	23.8	22.2	111.2	222.7	20.8	88.9	2.11966	0.00149972	0.0179862	Up
TLR2	21.5	26.6	22	31.2	150	77.9	69.4	113	1.97522	1.62013e-06	9.99743e-05	Up
SLCO2B1	619.3	355.1	330.1	422.1	1047.5	769.4	895	1564.6	1.32209	5.60971e-05	0.00151837	Up
RAB30	236.9	178.5	284.2	226.7	44.7	53.9	99.4	106.3	-1.60097	1.86787e-05	0.00066335	Down
LRRC32	527.7	269	194.4	195.4	1555.1	2794.3	526.4	925.4	2.30217	3.29078e-05	0.00101162	Up
SORL1	985.4	891.3	722.5	855.2	2396.7	12255.2	679.3	841.8	2.22736	0.00495479	0.0413697	Up
TMPRSS4	0	3.8	0	2	661.1	813.8	7.1	671.3	8.11349	2.0409e-11	1.47555e-08	Up
MMP7	0	5.7	11	8.1	3341.3	1010.3	39.9	97.6	7.39812	7.76187e-11	4.16331e-08	Up
TRIM29	10.8	4.4	0	4	734.6	1169	12	19.4	6.81623	9.65479e-08	1.13174e-05	Up
FDX1	80.8	82.9	93.5	70.5	176.4	248.2	119.6	149.1	1.08265	0.000820361	0.0117719	Up
TMPRSS13	0	1.9	1.8	2	24.1	91.7	6	1.3	4.14818	0.0017123	0.0196532	Up
SQOR	129.2	93.1	82.5	85.6	407	337.7	108.1	441.3	1.74934	0.000136376	0.00300898	Up
KIF23	10.8	19	14.7	5	253.5	40.8	11.5	38.1	2.78018	0.00276951	0.0275094	Up
ITGA11	59.2	341.8	36.7	171.3	1615.1	382.9	181.8	6296.4	3.78952	0.000116216	0.00265064	Up
PLCB2	64.6	65.2	58.7	55.4	209.4	187.1	108.7	183.9	1.50403	1.73146e-06	0.000105498	Up
PAK6	26.9	30.4	14.7	22.2	174.1	345	21.3	14.7	2.56137	0.00457136	0.039046	Up
STRA6	10.8	12	12.8	78.6	77.6	613.6	44.8	96.3	2.82724	0.00277316	0.0275162	Up
SELENOI	113.1	95	60.5	93.7	293.5	382.9	109.8	131	1.35148	0.00479316	0.0403669	Up
MYOF	506.2	525.4	353.9	525.8	1357.4	3664.1	648.2	1583.3	1.92388	9.74433e-05	0.00234271	Up
KIF11	10.8	6.3	9.2	12.1	119.4	45.9	9.8	32.1	2.4628	0.00207108	0.0223254	Up
CEP55	0	3.2	1.8	2	93.5	26.9	3.3	12	3.98691	0.000695399	0.0103511	Up
ADAMTS14	5.4	1.9	1.8	0	664.6	84.4	23.5	14	6.84508	1.8383e-07	1.833e-05	Up
RPS24	16590.9	17011.7	21367.5	18555.6	4624	5587.9	15449.5	8857.2	-1.09088	0.00616275	0.0483607	Down
SPPL2A	172.3	177.2	143	134	366.4	524.8	221.7	329	1.20715	0.000204503	0.00414198	Up
NAAA	80.8	83.6	73.3	59.4	278.8	602.7	89	124.4	1.88506	0.00153596	0.0182181	Up
FRAS1	10.8	29.1	18.3	45.3	168.2	59.7	43.7	137.1	1.89975	0.00175854	0.0199519	Up
SHROOM3	37.7	44.3	34.8	39.3	1172.8	658.7	34.9	953.5	4.17026	5.28299e-08	7.40333e-06	Up
ANXA3	43.1	13.9	11	19.1	598.7	61.1	19.1	276.8	3.53048	0.000100449	0.00237905	Up
LEF1	10.8	40.5	25.7	48.4	150.6	90.3	69.4	76.2	1.51678	0.00149606	0.0179775	Up
FBN2	10.8	31	5.5	11.1	103.5	48	36.6	148.4	2.44065	0.000496405	0.00804332	Up
RGS3	220.8	157	121	137	712.8	361.8	214.1	698.7	1.66053	0.00019324	0.00394986	Up
PARVG	64.6	29.1	23.8	37.3	164.1	240.9	57.3	115	1.97249	0.000205527	0.00415161	Up
B4GALNT3	43.1	34.2	29.3	37.3	194.1	425.8	19.1	157.1	2.47946	0.000730746	0.0107132	Up
ERP27	10.8	2.5	5.5	1	78.2	50.2	3.3	46.1	3.48182	0.000661384	0.0100369	Up
ETV6	107.7	109.5	71.5	75.6	238.2	419.3	105.4	215.3	1.43266	0.00153118	0.0182092	Up
TMEM19	86.2	95.6	64.2	88.6	172.9	294.1	105.9	163.1	1.1316	0.0033311	0.0314032	Up
LGR5	5.4	6.3	25.7	28.2	65.9	224.2	65	22.7	2.474	0.0022781	0.0238947	Up
DUSP6	274.6	341.8	75.2	89.7	628.7	737.3	427	596.4	1.61898	0.00176177	0.019974	Up
SDSL	26.9	110.1	88	66.5	291.1	303.5	94.5	193.9	1.55199	0.00214528	0.0228874	Up
SLC46A3	43.1	53.2	62.3	32.2	81.2	214.7	82.5	232.7	1.67369	0.000740127	0.0108196	Up
SLC7A1	193.9	212.1	157.7	159.2	1970.3	347.2	228.8	465.4	2.05972	0.00125306	0.0159373	Up
ACVRL1	172.3	136.7	49.5	95.7	283.5	215.5	161.1	448	1.3082	0.00568304	0.0455199	Up
ITGB7	21.5	28.5	9.2	19.1	175.3	207.4	10.4	50.8	2.49418	0.00270162	0.0270061	Up
GALNT6	37.7	23.4	18.3	23.2	129.4	69.1	32.8	250.7	2.28167	0.000409448	0.00694543	Up
VPS37B	226.2	242.4	198	197.4	594	202.3	696.3	371.8	1.1108	0.00599887	0.047439	Up
DIAPH3	5.4	0	0	0	108.2	8	2.7	29.4	6.19058	0.000179887	0.00374084	Up
SLAIN1	59.2	65.2	71.5	45.3	802.8	185.6	77.5	42.1	2.19999	0.00606777	0.0478865	Up
RTN1	16.2	23.4	16.5	18.1	71.2	66.2	32.8	74.9	1.67271	0.000214196	0.00429513	Up
RAB15	53.8	62.7	27.5	35.3	153.5	140.5	86.8	352.4	2.03776	0.000106018	0.0024836	Up
STON2	43.1	46.8	69.7	52.4	334.1	235.1	85.7	72.9	1.77093	0.00140689	0.0172861	Up
GPR65	5.4	9.5	1.8	5	28.8	22.6	14.2	30.1	2.0186	0.00276419	0.0274917	Up
SLC27A2	0	3.8	0	1	40	3.6	4.4	52.2	3.9185	0.00319195	0.0304233	Up
PIF1	0	4.4	1.8	2	245.8	19.7	1.6	26.1	4.89522	0.000220044	0.00437697	Up
SCAMP2	473.9	477.9	484.1	522.8	1217.5	1232.3	505.1	1004.3	1.01408	0.00145486	0.0176607	Up
FURIN	974.7	833.1	1074.5	792.8	2530.8	3105.1	1246.7	1470.3	1.18593	0.00058194	0.00907932	Up
PMM2	129.2	150	128.4	122.9	409.4	292.6	150.7	355.7	1.18341	0.000918373	0.012732	Up
ITGAX	16.2	46.8	23.8	37.3	252.9	96.1	31.1	101.6	1.90063	0.00372687	0.0339057	Up
MARVELD3	37.7	7	9.2	2	175.9	161.6	4.4	126.4	3.24986	0.00145323	0.0176607	Up
ADAMTS18	0	3.2	1.8	0	15.9	26.2	1.6	262.8	5.61502	0.000147914	0.00319555	Up
IRF8	64.6	66.5	40.3	28.2	175.3	137.6	75.9	372.4	1.94954	0.000444419	0.00740691	Up
TOM1L1	16.2	34.2	25.7	47.3	183.5	176.9	46.4	232.7	2.30996	4.14939e-05	0.00120869	Up
SKAP1	5.4	12	5.5	10.1	39.4	268.6	2.7	17.4	3.25709	0.00367036	0.0335246	Up
MEP1B	0	0	0	0	55.3	0	1.1	68.2	6.73993	0.00170242	0.0195578	Up
ZMYND15	10.8	14.6	14.7	16.1	38.2	29.8	28.4	62.2	1.44495	0.00308446	0.0297082	Up
PIK3R5	26.9	32.9	25.7	27.2	180.6	80.1	49.1	131	1.95255	8.1601e-05	0.00201797	Up
TMC6	166.9	119	69.7	83.6	1628	1150.8	111.4	306.9	2.87579	6.54271e-05	0.00170187	Up
SLC16A3	96.9	125.3	86.2	86.6	3117.2	623.8	302	702.1	3.58373	5.09328e-08	7.30702e-06	Up
CARD14	0	9.5	7.3	10.1	53.5	168.1	13.1	18.1	3.06905	0.00109401	0.0143002	Up
TTYH2	716.2	644.4	737.1	662.8	77.6	96.1	470.2	263.4	-1.6042	0.00355364	0.0327663	Down
SECTM1	107.7	106.3	56.8	99.7	518.2	395.2	124	149.8	1.68299	0.00138235	0.0171197	Up
ZNF750	0	3.2	1.8	1	25.3	172.5	2.2	4	4.79669	0.000628663	0.00963433	Up
TNFRSF11A	37.7	25.3	20.2	27.2	87.6	54.6	25.1	231.3	1.88497	0.00562604	0.0452108	Up
GRB7	16.2	10.1	16.5	17.1	389.4	1710.5	20.2	137.7	5.24888	9.15821e-08	1.10431e-05	Up
TXNL4A	253.1	247.5	269.5	299.2	1156.9	520.4	270.9	524.2	1.20786	0.00560883	0.0451113	Up
MISP3	10.8	2.5	0	6	102.3	143.4	4.4	44.1	4.14188	0.000120959	0.00272683	Up
PLPP2	5.4	47.5	53.2	79.6	371.1	686.4	133.8	209.3	2.85894	1.61948e-05	0.000584478	Up
VAV1	43.1	28.5	22	31.2	266.4	238.7	72.6	118.3	2.52652	6.93008e-07	5.31022e-05	Up
IFITM3	3667.1	3412	4299.9	3145	11617.7	6010.8	4773.9	8020.1	1.06693	0.000772512	0.0111814	Up
PGGHG	32.3	103.2	44	42.3	155.9	148.5	80.8	355	1.69641	0.0028632	0.0282775	Up
HUNK	16.2	36.7	5.5	16.1	302.3	396.7	30.6	220	3.62576	3.12723e-06	0.000167738	Up
TRPM2	53.8	36.7	25.7	27.2	351.1	478.9	75.4	121	2.88198	3.40175e-06	0.000178764	Up
DOP1B	96.9	71.5	93.5	96.7	192.9	346.5	99.9	249.4	1.31788	0.00164521	0.0190456	Up
LMTK3	0	7	1.8	12.1	115.3	85.2	7.1	26.7	3.2838	0.00100294	0.0134779	Up
CBLC	5.4	1.3	1.8	0	614.6	431.6	4.9	187.2	7.74965	7.85623e-10	2.98058e-07	Up
RNPEPL1	344.6	334.9	326.4	313.3	1011	1597.7	315.1	742.8	1.47554	0.00117513	0.0151443	Up
MYO1F	107.7	76	40.3	70.5	421.1	192.2	143.6	286.8	1.85859	3.4404e-05	0.00104318	Up
SIGLEC10	5.4	1.9	5.5	5	52.3	47.3	16.4	26.7	3.14304	2.07129e-05	0.000720781	Up
RPS11	35465.1	37555.1	60833.1	46245.9	14757.8	14821.7	35885.4	20149.6	-1.07289	0.00337524	0.031704	Down
SLC2A5	43.1	40.5	38.5	72.5	298.8	83.7	114.1	164.5	1.74912	0.000397165	0.0067889	Up
MMEL1	10.8	1.9	0	0	50	86.6	2.7	8	4.19555	0.00301837	0.0293626	Up
EPHA2	129.2	244.3	121	123.9	2276.7	740.2	197.1	598.4	2.61774	6.07762e-05	0.00161602	Up
EFHD2	366.2	659	447.4	553	1710.3	986.3	1073.1	2334.8	1.58377	1.13701e-05	0.000442157	Up
MYOM3	0	3.2	3.7	7.1	77	12.4	7.6	14.7	2.81362	0.00574907	0.0458599	Up
SH3BGRL3	269.2	389.9	341.1	361.6	1632.7	666	432.5	986.2	1.44302	0.000620637	0.00958691	Up
CNKSR1	26.9	51.3	44	50.4	298.8	315.2	26.2	84.2	2.0442	0.00416643	0.0366981	Up
MAP3K6	188.5	133.6	124.7	93.7	337	414.2	180.8	430.6	1.36304	0.000234997	0.00459534	Up
FCN3	0	3.8	5.5	4	47.6	23.3	14.7	46.1	3.09576	3.4006e-05	0.00103443	Up
SYTL1	10.8	28.5	7.3	22.2	257	515.3	15.3	55.5	3.56557	0.000125704	0.00281747	Up
KIF2C	21.5	13.3	12.8	4	631.1	64.1	11.5	44.8	3.92692	0.000198632	0.00403885	Up
CYP4B1	21.5	22.8	9.2	9.1	1300.4	5496.9	8.7	8	6.7764	2.65236e-05	0.000850668	Up
TMEM61	0	0.6	0	0	24.1	83.7	0.5	8.7	5.99019	0.000335547	0.00597967	Up
SLC44A3	10.8	11.4	14.7	18.1	31.2	136.8	27.9	266.8	3.0483	0.000100457	0.00237905	Up
IGSF3	32.3	73.4	29.3	46.3	192.9	267.9	67.2	137.1	1.82829	0.000491075	0.00799024	Up
C1orf162	10.8	22.2	16.5	22.2	82.9	71.3	40.4	52.8	1.68275	0.000136848	0.00301086	Up
CD53	140	103.2	56.8	92.7	614.6	310.1	188.4	309.6	1.88131	2.40619e-05	0.000803182	Up
PROK1	3403.3	2014.9	1923.5	3379.7	51.2	57.5	1473.9	278.1	-2.52612	0.00471167	0.0398871	Down
CELSR2	107.7	116.5	135.7	119.9	1382.1	1121.7	108.7	84.2	2.48932	0.001803	0.0203229	Up
RXRG	59.2	6.3	18.3	13.1	1.8	1.5	6.6	4.7	-2.60124	0.00357377	0.0328935	Down
ILDR2	0	3.8	1.8	9.1	68.2	61.1	10.9	18.7	3.18536	0.000533634	0.00852226	Up
DPT	791.6	48.1	115.5	170.2	41.8	15.3	27.3	67.5	-2.87327	0.000367316	0.00637678	Down
NECTIN4	5.4	3.2	0	2	444.6	881.5	5.5	35.4	7.1834	2.91787e-08	4.93342e-06	Up
FCGR2A	75.4	105.7	86.2	74.5	704	350.1	444.5	478.7	2.51206	1.06574e-15	8.28879e-12	Up
CRABP2	37.7	66.5	42.2	85.6	9165.1	27141.7	81.4	209.9	7.29603	2.50955e-07	2.30982e-05	Up
XPR1	118.5	231.7	190.7	197.4	1683.3	724.2	293.3	252.1	1.99117	0.000949939	0.0129777	Up
RGS16	75.4	76.6	23.8	61.4	302.9	74.2	270.3	107.6	1.67873	0.00345534	0.0322114	Up
HMCN1	86.2	269.7	166.9	201.5	230.6	385	496.9	1513.1	1.84456	0.00231365	0.0240889	Up
RORC	21.5	5.1	7.3	9.1	72.9	269.3	6.6	212	3.84885	3.95669e-05	0.00115906	Up
CGN	48.5	80.4	119.2	96.7	429.9	1096.9	111.9	425.2	2.56576	3.28689e-05	0.00101162	Up
RFX5	226.2	198.1	205.4	222.6	735.8	1152.2	220.6	425.2	1.57351	0.00108633	0.0142478	Up
DTL	0	5.7	3.7	4	95.9	45.9	4.4	15.4	3.37091	0.00118488	0.0152195	Up
DUSP10	16.2	32.9	9.2	20.1	183.5	488.4	30.6	39.4	3.20864	0.000216978	0.00433817	Up
S100A8	0	3.2	1.8	6	35.9	104.8	20.2	8	3.6784	0.000257958	0.00491732	Up
TPM3	872.4	955.9	775.6	888.5	3177.8	3064.4	1165.4	1523.1	1.35409	0.000256458	0.00489472	Up
MAP3K21	16.2	26.6	18.3	13.1	220.6	165.2	23.5	76.2	2.685	0.000107305	0.00249124	Up
PPFIA4	32.3	20.3	14.7	11.1	321.1	96.1	15.8	46.8	2.67462	0.00151471	0.0180962	Up
EML4	274.6	355.1	269.5	321.3	803.4	913.5	309.6	737.5	1.17357	0.00127938	0.0161401	Up
SFXN5	118.5	121.5	115.5	140	738.7	310.8	139.8	195.2	1.47994	0.00471568	0.0398871	Up
MALL	96.9	62.7	23.8	33.2	442.9	462.2	96.7	446.6	2.79032	2.65512e-06	0.00014842	Up
THSD7B	32.3	8.9	9.2	2	41.2	152.9	38.2	353	3.68079	5.04813e-05	0.00141484	Up
SUMF1	258.5	402.6	319.1	322.4	839.9	1445.6	397	734.1	1.38429	0.00063396	0.00968688	Up
HES6	37.7	25.3	12.8	39.3	577	297.7	37.7	106.3	3.16142	3.84287e-05	0.00113642	Up
GRIP2	215.4	145	214.5	162.2	54.7	42.2	131.1	44.8	-1.42128	0.00144628	0.017617	Down
OSBPL10	48.5	83.6	71.5	163.2	604.6	385	98.3	240.7	1.83383	0.00190054	0.0210263	Up
ACKR2	0	3.8	0	9.1	197	89.5	5.5	9.4	4.33727	0.000680934	0.0102223	Up
ITGA9	306.9	315.9	256.7	280	487	2098.5	391	1010.3	1.78192	0.000637489	0.0097217	Up
COL8A1	134.6	228.5	95.3	143	736.9	457.8	481.1	2615	2.82818	3.25784e-06	0.000172366	Up
ADPRH	64.6	83.6	49.5	41.3	146.4	143.4	67.2	180.5	1.16712	0.0061975	0.048437	Up
NCEH1	43.1	37.3	29.3	24.2	160	99	47.5	78.2	1.55864	0.00111156	0.0144689	Up
MANF	253.1	239.9	236.5	216.6	739.3	1238.8	241.9	377.8	1.45878	0.00304268	0.0295277	Up
ILDR1	0	1.3	0	1	87	318.8	2.2	29.4	6.93805	1.26124e-06	8.17439e-05	Up
MUC4	0	2.5	16.5	2	155.9	18.9	6	80.9	3.58443	0.00147729	0.0178442	Up
OCIAD2	118.5	140.5	102.7	123.9	907.5	477.5	130.5	295.5	1.89599	0.000492964	0.00800456	Up
USP53	123.9	96.9	115.5	108.8	1258.6	696.6	120.7	109.7	2.29963	0.00146449	0.0177355	Up
NKD2	0	1.3	0	7.1	237.6	25.5	87.9	77.6	5.37909	1.00598e-07	1.13391e-05	Up
ADAMTS16	872.4	381.1	744.5	382.8	27.1	69.9	272.5	211.3	-2.03158	0.00203373	0.0220297	Down
OSMR	339.2	307	249.4	200.5	828.7	492.8	886.9	1220.9	1.6555	1.08198e-06	7.34354e-05	Up
HAPLN1	0	1.3	0	1	52.3	31.3	1.6	0.7	4.60642	0.00396418	0.0354181	Up
CRHBP	37.7	17.1	14.7	29.2	4.1	5.1	9.8	4.7	-1.97249	0.00112162	0.014539	Down
LIX1	5.4	0.6	0	1	89.4	260.6	1.1	0.7	6.30974	0.000119714	0.00271055	Up
ARHGAP26	113.1	62.7	64.2	64.5	280.5	560.5	62.3	236.7	1.93059	0.00119975	0.0153598	Up
CXCL14	64.6	90.5	55	17.1	95.9	1027	10.4	353	2.71103	0.00631399	0.0490387	Up
N4BP3	129.2	84.2	71.5	90.7	354.7	468.8	68.3	295.5	1.67787	0.00207899	0.0223797	Up
DCDC2	0	4.4	5.5	2	67	166	5.5	53.5	4.4292	1.42942e-05	0.000529395	Up
TNFRSF21	166.9	169.6	130.2	208.5	989.9	2477	346.2	333.6	2.61687	3.08876e-05	0.000960915	Up
DOK3	37.7	27.2	22	17.1	149.4	82.2	45.3	109.7	1.96505	7.12729e-05	0.00181746	Up
FGD2	43.1	45.6	33	29.2	197	141.9	52.4	121.7	1.77663	0.00018836	0.00387807	Up
TPBG	91.5	211.4	124.7	147.1	574	358.8	294.3	258.1	1.34061	0.000446021	0.00742016	Up
ABRACL	32.3	14.6	3.7	6	91.2	112.1	20.8	88.9	2.65107	0.00035936	0.00626665	Up
CDCA5	21.5	11.4	3.7	16.1	629.9	113.5	15.3	38.8	3.96788	9.5478e-05	0.00231059	Up
POMZP3	188.5	84.8	139.4	172.3	28.8	71.3	89.6	46.8	-1.28931	0.00424011	0.0371786	Down
EPHA1	5.4	4.4	7.3	4	986.9	235.8	5.5	122.4	6.02112	3.82882e-08	5.95573e-06	Up
DENND2A	867	703.9	775.6	780.7	118.8	113.5	599.6	255.4	-1.52252	0.00437397	0.0379037	Down
FRMPD3	210	160.2	313.6	135	3.5	7.3	100.5	43.5	-2.39957	0.00516612	0.042563	Down
GINS4	26.9	15.8	12.8	16.1	212.3	77.9	14.7	39.4	2.31815	0.0030511	0.0295516	Up
SYBU	53.8	75.3	86.2	44.3	265.3	720.6	54.1	164.5	2.20733	0.00137594	0.017054	Up
MAL2	5.4	14.6	20.2	10.1	4273.5	2363.4	19.1	169.8	7.04991	2.87482e-10	1.24216e-07	Up
FAM83A	5.4	0.6	0	0	365.2	259.1	0.5	8	7.69765	4.34877e-06	0.000216811	Up
ARHGAP39	150.8	162.1	100.9	155.1	1443.3	617.2	139.8	165.1	2.0559	0.00295459	0.0289594	Up
SLC39A4	96.9	181	155.9	131	1909.7	334.8	125.6	250.7	2.20809	0.00333842	0.0314075	Up
CDKN2B	10.8	12	29.3	26.2	362.9	72.1	38.8	324.3	3.31794	1.1699e-05	0.00045268	Up
PTGES	26.9	34.8	62.3	35.3	624.6	145.6	86.8	13.4	2.44068	0.00600585	0.04747	Up
LCN2	0	3.2	9.2	2	761.1	1449.2	12.6	391.8	7.41223	1.46054e-11	1.3364e-08	Up
PROSER2	32.3	44.9	33	44.3	181.7	109.9	46.4	75.6	1.39168	0.00504727	0.0419169	Up
CDHR1	5.4	17.7	29.3	14.1	65.3	1184.3	122.9	2386.3	5.77682	2.18769e-09	6.80591e-07	Up
PLEKHS1	0	2.5	7.3	0	72.3	121.6	0.5	121	4.91831	0.000290808	0.00541739	Up
MKI67	21.5	13.3	9.2	3	1407.4	200.9	15.3	103.6	5.27894	9.13257e-07	6.54641e-05	Up
RGS10	75.4	143.7	137.5	125.9	214.1	223.5	172.6	451.3	1.11047	0.00516317	0.042563	Up
PTPRJ	140	74.7	75.2	94.7	313.5	215.5	127.8	285.5	1.33494	0.000508921	0.00819341	Up
KLHL35	0	11.4	7.3	10.1	48.8	147.8	6.6	57.5	3.01065	0.00105841	0.0140116	Up
C11orf52	5.4	19	12.8	14.1	64.7	206.7	21.8	43.5	2.62087	0.000600832	0.0093366	Up
P4HA3	16.2	20.3	3.7	16.1	61.2	18.9	31.1	417.2	3.22523	0.000925031	0.0127561	Up
ST14	32.3	29.1	31.2	34.3	4134.7	1396.1	67.7	1404.1	5.78823	3.20892e-12	3.56534e-09	Up
MPZL2	26.9	22.8	5.5	5	232.3	556.1	32.8	78.9	3.96573	7.98717e-06	0.000330427	Up
NUDT22	166.9	222.8	251.2	222.6	809.3	728.6	220.6	385.8	1.30464	0.00276134	0.0274809	Up
FERMT3	113.1	76.6	53.2	105.8	545.8	208.9	135.4	334.3	1.82791	0.0001956	0.00398763	Up
FCGR1A	32.3	31.7	12.8	19.1	245.8	105.5	117.4	108.3	2.61863	5.36895e-08	7.45661e-06	Up
LYPD6B	5.4	7	5.5	2	196.4	450.6	6.6	21.4	5.0951	5.27232e-06	0.00024598	Up
IL18	0	12	3.7	8.1	21.8	48.8	9.8	67.5	2.40382	0.00498029	0.0415157	Up
FOXO1	1750.1	1851.6	1553.1	1516.1	201.7	133.2	1242.4	484.8	-1.69341	0.00644321	0.0498359	Down
NOCT	5.4	3.8	9.2	14.1	96.5	40	19.1	20.1	2.39763	0.00218539	0.0231565	Up
KCTD14	5.4	8.2	11	11.1	90.6	508.8	6.6	36.8	4.12991	8.25499e-05	0.00202854	Up
THRSP	0	0	0	2	110	486.2	0.5	0.7	7.59417	0.00177958	0.0201026	Up
PTPRO	10.8	7.6	9.2	10.1	63.5	34.2	25.1	32.8	2.09932	0.00014367	0.0031212	Up
GFRA1	791.6	118.4	157.7	272	40.6	23.3	54.6	68.9	-2.82089	8.0958e-06	0.000334032	Down
ARL11	21.5	5.1	7.3	3	44.1	40	15.8	26.7	2.13076	0.002966	0.0289982	Up
KCNK13	0	3.8	1.8	2	35.9	13.1	5.5	40.8	3.31428	0.000991894	0.01336	Up
IGSF10	1217	502	867.3	799.8	36.5	54.6	489.3	96.3	-2.3207	0.001905	0.0210308	Down
MARVELD2	10.8	3.2	3.7	2	63.5	75	7.6	48.1	3.64371	3.81934e-05	0.00113162	Up
FAM49B	102.3	131	91.7	115.8	730.5	624.5	165.5	169.8	1.93299	0.000400582	0.0068323	Up
CMTM7	26.9	70.9	51.3	49.4	1128.1	477.5	59.5	141.1	3.16203	5.42748e-05	0.00148635	Up
CEBPG	113.1	81.7	75.2	66.5	469.3	216.2	104.8	214.6	1.60307	0.000850905	0.0120661	Up
THY1	107.7	431.7	144.9	142	3800.6	2261.5	429.2	3803.8	3.62833	5.98766e-08	7.81254e-06	Up
UBASH3B	10.8	14.6	11	15.1	65.9	180.5	21.8	14.7	2.42857	0.00308128	0.029696	Up
NRGN	199.2	128.5	40.3	102.8	31.8	16.7	67.2	28.1	-1.6864	0.00422217	0.037045	Down
GAL3ST2	0	0	0	0	59.4	96.1	1.1	0	7.06929	0.000987242	0.0133188	Up
TNIK	26.9	19.6	38.5	28.2	85.9	74.2	47.5	95.6	1.44451	0.000436303	0.00731325	Up
FAM167A	0	3.2	0	2	25.9	22.6	2.7	17.4	3.26257	0.00425969	0.0373083	Up
CXADR	0	5.1	18.3	7.1	160	107	10.4	88.9	3.49771	7.16018e-05	0.00182286	Up
CHODL	5.4	7	7.3	3	70	114.3	6.6	13.4	3.16703	0.00104793	0.0139203	Up
PDE1C	113.1	48.7	58.7	72.5	5.9	6.6	26.8	18.1	-2.31639	0.000100637	0.00237905	Down
ADAMTS5	791.6	399.4	700.5	1453.6	135.9	72.8	423.2	123	-2.14698	0.0003356	0.00597967	Down
SLFN13	10.8	34.2	25.7	15.1	161.7	408.3	33.9	117	3.01553	3.59849e-05	0.00108478	Up
USP43	0	4.4	3.7	3	59.4	67.7	2.2	34.1	3.65477	0.000504134	0.00812622	Up
RAB6B	118.5	88	45.8	73.5	278.8	499.3	71.5	323.6	1.86772	0.00102321	0.0136618	Up
PROM2	32.3	20.3	25.7	14.1	299.4	1979.1	20.8	169.2	4.76876	1.47199e-06	9.1955e-05	Up
HEATR3	59.2	64.6	40.3	49.4	166.4	224.2	60.1	105	1.38148	0.00346173	0.0322114	Up
SLC7A7	16.2	24.1	16.5	25.2	205.9	76.4	58.4	317.6	2.9659	1.73626e-06	0.000105498	Up
VSIG4	96.9	72.2	64.2	60.4	577	285.3	362.1	466.7	2.57041	2.17071e-15	8.44133e-12	Up
PDIA4	1098.5	1098.9	1232.2	1272.3	4365.2	3756.6	1241.3	1859.4	1.25462	0.00228821	0.0239523	Up
FZD7	1620.9	2465.6	1498.1	1995.6	454.1	569.2	1011.9	385.1	-1.6481	6.22746e-06	0.000275193	Down
SLA	37.7	26.6	33	35.3	216.4	95.4	49.7	105.6	1.8405	0.00031879	0.00580653	Up
FAM161B	263.9	262.1	344.7	359.6	44.7	62.6	200.4	151.8	-1.42217	0.00407166	0.0361499	Down
KCNMA1	425.4	418.4	247.5	314.3	142.3	136.1	238.6	133.1	-1.10548	0.000518269	0.008311	Down
BATF	10.8	13.3	3.7	6	44.1	56	7.1	40.8	2.13057	0.00645002	0.049841	Up
FGF18	0	0.6	1.8	0	184.7	18.9	1.6	6	6.12612	0.000106598	0.00248596	Up
PCDH1	220.8	67.7	60.5	49.4	1046.9	1825.5	72.6	573	3.17177	7.77507e-05	0.00194127	Up
SH3RF2	59.2	7.6	14.7	18.1	87	291.9	12.6	201.3	2.6812	0.00242678	0.024966	Up
HKDC1	0	3.2	0	2	209.4	170.3	2.7	149.8	6.24207	2.86395e-07	2.57507e-05	Up
HK1	533.1	595	507.9	586.3	1052.8	2259.3	548.3	1345.9	1.2269	0.00310208	0.0297866	Up
AIFM1	156.2	196.9	183.4	198.5	816.3	1559.1	167.1	254.1	1.92466	0.00250208	0.0255465	Up
MAPK13	123.9	83.6	53.2	74.5	916.3	2057	109.8	419.2	3.3996	2.73893e-06	0.000150544	Up
TBC1D31	21.5	33.5	29.3	24.2	294.1	75.7	38.2	42.1	2.03135	0.00443582	0.0381888	Up
BUB1B	5.4	3.8	9.2	2	372.3	34.2	8.7	25.4	4.49293	6.74442e-05	0.00174268	Up
SST	0	2.5	1.8	3	23.5	12.4	3.3	54.8	3.39112	0.00193352	0.0212551	Up
NMNAT2	21.5	15.2	9.2	24.2	214.7	1214.8	10.4	34.1	4.40382	5.77172e-05	0.00154238	Up
ATP2B2	5.4	5.7	0	1	180.6	175.4	3.3	0.7	4.95791	0.000806061	0.0115881	Up
LRP8	43.1	33.5	27.5	35.3	285.3	300.6	32.2	65.5	2.30945	0.000944258	0.0129339	Up
CACNA1D	0	12.7	11	26.2	31.8	90.3	41.5	92.3	2.18893	0.00101966	0.0136379	Up
CCNB2	5.4	7.6	3.7	6	449.3	48	8.2	36.1	4.54528	2.64397e-05	0.000849731	Up
TSC22D3	1604.7	3020.8	2515.8	1447.6	587	917.9	1394.2	1248.3	-1.05162	0.00511062	0.042282	Down
CREB3L1	91.5	127.9	44	92.7	369.9	344.3	170.4	1640.1	2.82138	3.67705e-05	0.00110396	Up
SLC34A2	5.4	38	62.3	18.1	8174.7	6044.3	26.2	156.5	6.84646	2.68873e-06	0.000148837	Up
GAREM2	75.4	145	174.2	177.3	50.6	45.9	93.4	84.9	-1.08355	0.00602657	0.0476096	Down
KRTCAP3	16.2	9.5	1.8	22.2	681.7	473.8	10.9	124.4	4.71338	3.01489e-06	0.000162836	Up
SLC30A2	0	0	0	0	7.1	8.7	0	108.3	6.73399	0.00153063	0.0182092	Up
GRHL3	0	0	0	0	105.3	242.4	1.1	2	8.23299	9.56122e-06	0.000388315	Up
GALNT14	0	3.2	0	12.1	143.5	31.3	13.7	48.8	3.73181	0.000485631	0.00790994	Up
RHPN1	10.8	19.6	18.3	22.2	1034	1560.6	32.8	68.2	5.21754	1.03595e-07	1.15101e-05	Up
XDH	0	1.3	0	0	85.3	42.2	1.1	206.6	7.02116	4.48151e-06	0.000220601	Up
RHBDL2	0	1.3	3.7	4	58.2	45.1	1.6	16	3.59354	0.00187042	0.0209011	Up
CDC25C	0	0	0	1	83.5	11.6	1.1	8	5.68511	0.000579134	0.0090537	Up
TSPAN33	37.7	74.7	42.2	54.4	288.2	944.1	117.4	212	2.87726	6.59098e-06	0.000287985	Up
B4GALT5	662.3	677.3	513.4	522.8	2066.8	2892.6	1066.5	1223.6	1.61077	1.06333e-05	0.000420867	Up
NCF1	37.7	46.8	22	34.3	262.9	134.7	68.3	215.3	2.26482	7.79115e-06	0.000323177	Up
GDPD5	123.9	172.8	95.3	137	419.9	277.3	129.4	417.9	1.22484	0.00444498	0.0382209	Up
TAGLN2	1922.4	1654.1	1861.2	1674.2	4726.4	8075	1998.2	2263.3	1.26294	0.00545775	0.0442155	Up
SLAMF8	32.3	35.4	14.7	43.3	272.3	56.8	59.5	98.3	1.94182	0.00218831	0.0231717	Up
F11R	253.1	244.3	207.2	206.5	1169.2	1455.8	296.5	581	1.94502	4.99757e-05	0.00140828	Up
SPATA2L	80.8	122.2	88	77.6	252.3	171.1	399.7	177.2	1.4248	0.000190364	0.00390132	Up
DMTN	118.5	103.2	45.8	66.5	504.6	301.3	71	203.3	1.70898	0.00367456	0.0335433	Up
FCER1G	86.2	67.1	51.3	53.4	451.7	175.4	181.3	304.9	2.14301	2.07591e-07	1.98103e-05	Up
LAD1	0	2.5	1.8	2	598.7	607	6.6	353	7.64605	1.98089e-11	1.47555e-08	Up
STC1	26.9	34.8	9.2	13.1	275.3	72.8	92.3	137.7	2.78862	5.04633e-06	0.000237866	Up
TNNI1	0	1.9	1.8	2	30	34.9	0.5	22.7	3.65969	0.00300583	0.0293139	Up
C1QC	371.6	370.9	278.7	278	2811.9	1388.8	1363	1717	2.49117	1.92807e-15	8.44133e-12	Up
RUNX1	123.9	265.9	220	240.8	744	930.2	750.9	976.9	1.96235	2.9584e-13	4.60179e-10	Up
ARHGAP27	172.3	160.2	93.5	128.9	1245.1	572.8	198.2	637.2	2.2639	1.39212e-05	0.000521792	Up
M1AP	0	4.4	3.7	0	69.4	155.8	3.8	4	4.64458	0.000860872	0.0121641	Up
ACE	150.8	157	102.7	138	507.6	1583.9	196	859.2	2.52129	8.59788e-06	0.000353809	Up
PTGIR	21.5	15.8	11	17.1	44.1	49.5	22.4	59.5	1.46845	0.00311403	0.0298268	Up
NR2F6	425.4	540	575.8	454.3	3707.7	1555.5	463.6	742.2	1.69566	0.00389568	0.0349466	Up
CILP2	10.8	161.4	49.5	72.5	171.2	119.4	241.9	787	2.12983	0.00574287	0.045834	Up
ABCG1	166.9	115.2	128.4	162.2	272.3	442.5	339.7	292.9	1.25401	3.60089e-06	0.000186086	Up
TMPRSS3	16.2	10.1	11	6	657.5	1369.9	2.7	399.2	5.86402	4.60782e-08	6.82616e-06	Up
SLC37A1	123.9	117.7	102.7	117.9	264.7	422.9	118.5	470	1.46757	0.00092106	0.0127511	Up
AGPAT3	597.7	583.6	577.6	527.9	1692.7	1872.1	586.5	826.4	1.12281	0.00488588	0.0409041	Up
ICOSLG	16.2	36.1	16.5	26.2	462.9	223.5	28.4	145.8	3.13608	2.23543e-05	0.000757584	Up
ITGB2	258.5	237.4	141.2	187.4	2297.9	1479	577.2	839.1	2.66134	7.87326e-09	1.69344e-06	Up
SLC2A6	10.8	6.3	3.7	11.1	283.5	88.8	14.7	38.8	3.78091	2.86763e-05	0.000906083	Up
ZNF714	215.4	134.2	124.7	189.4	43.5	38.6	110.9	35.4	-1.52383	0.00103244	0.0137732	Down
ZDHHC12	113.1	77.9	75.2	74.5	559.9	217.6	95.6	301.5	1.80558	0.000543964	0.00863404	Up
MPZL3	5.4	11.4	0	4	52.9	81.5	14.2	18.7	2.91191	0.00180276	0.0203229	Up
TLCD1	5.4	13.3	11	10.1	151.7	164.5	6	24.7	3.06342	0.00107948	0.0141819	Up
PCSK7	296.2	277.9	251.2	306.2	842.8	626.7	332.6	694	1.14253	0.000388559	0.00667112	Up
S100A1	5.4	7	23.8	3	1742.1	2080.3	4.9	4	6.60433	7.52708e-05	0.00189456	Up
FDPS	360.8	439.9	480.4	468.4	1775.6	1324.7	483.8	615.1	1.26016	0.00403205	0.0358712	Up
NBEAL2	306.9	310.2	284.2	359.6	994.6	1183.5	304.7	674	1.32242	0.00147867	0.0178442	Up
AZGP1	5.4	11.4	3.7	3	0.6	363.2	2.2	261.4	4.70854	0.000704762	0.0104605	Up
NACC1	166.9	320.9	286	329.4	2075	1574.4	300.9	569.7	2.02753	0.000459796	0.00758443	Up
HK3	5.4	16.5	1.8	8.1	206.4	17.5	36.6	44.1	3.16041	0.000622881	0.00960249	Up
LY6E	2127	2975.2	2466.3	2024.8	18857.8	20622.9	2429	3853.3	2.25386	0.000394665	0.00675358	Up
TONSL	75.4	133.6	86.2	89.7	2346.7	436	111.9	110.3	2.95936	0.000631507	0.0096617	Up
RECQL4	53.8	54.4	78.8	44.3	2459	414.9	60.1	62.9	3.69493	0.000155558	0.00334213	Up
PPP1R16A	506.2	643.8	672.9	562.1	4194.7	2549.7	490.4	714.1	1.7358	0.00493597	0.0412347	Up
CELF5	150.8	182.9	251.2	244.8	25.3	9.5	134.3	47.5	-1.9387	0.00510647	0.042282	Down
MFSD12	140	198.8	192.5	195.4	657.5	506.6	190.6	302.9	1.17884	0.00470467	0.039859	Up
SHANK1	10.8	10.1	11	19.1	74.1	75.7	48.6	64.2	2.32007	9.34611e-08	1.10976e-05	Up
AQP5	0	0.6	3.7	3	98.8	567.7	3.8	14.7	6.40212	2.62559e-06	0.000147975	Up
SPC24	0	4.4	0	0	558.7	54.6	4.9	12.7	6.69477	2.33998e-05	0.000789553	Up
CXCL16	204.6	252.6	267.7	248.8	779.3	563.4	513.9	859.8	1.46797	8.32728e-09	1.72708e-06	Up
SCIMP	5.4	12.7	22	7.1	32.9	42.9	31.7	48.1	1.66175	0.0012354	0.0157514	Up
BICDL2	0	3.2	1.8	2	376.4	987	2.2	144.4	7.47831	4.73586e-09	1.27011e-06	Up
PAQR4	5.4	15.2	11	16.1	463.5	371.9	28.9	105	4.26056	1.17131e-07	1.26526e-05	Up
SHANK2	0	4.4	9.2	7.1	90	157.2	6	32.8	3.65735	0.000181762	0.00377394	Up
ASRGL1	16.2	32.3	34.8	17.1	2454.3	375.6	21.8	48.1	4.83754	1.07569e-05	0.000423605	Up
LBHD1	5.4	12.7	7.3	13.1	41.8	68.4	14.7	37.4	1.95623	0.00251333	0.0256023	Up
PDZK1IP1	10.8	4.4	11	6	322.3	139	10.4	508.8	5.01281	7.0313e-08	8.80597e-06	Up
AK4	161.5	81	58.7	68.5	524	351.6	77	244	1.72765	0.00309529	0.0297757	Up
LAPTM5	414.6	310.2	174.2	332.4	3016.6	992.8	684.3	986.9	2.21084	1.6432e-05	0.000590298	Up
SDC3	409.3	619.7	256.7	494.6	1629.8	1272.3	643.8	1688.9	1.55158	0.000111924	0.00257896	Up
UBXN10	32.3	48.7	44	33.2	137.6	128.1	74.3	111	1.47224	2.80975e-05	0.000891951	Up
ALPL	16.2	62	42.2	40.3	447	968.8	89.6	410.5	3.52697	9.98379e-08	1.13356e-05	Up
ARPC5	587	727.3	463.9	506.7	1539.8	1888.1	658	1003.6	1.15455	0.00188859	0.020985	Up
CADM3	10.8	19.6	16.5	11.1	471.7	164.5	14.7	1.3	3.47346	0.00293308	0.0287784	Up
NLRP3	10.8	20.9	11	18.1	73.5	51.7	66.1	56.2	1.90132	2.86573e-06	0.000155862	Up
TRIM58	0	0.6	0	1	118.2	45.1	3.8	2	5.91684	0.000104841	0.00246345	Up
OLFML2B	53.8	63.3	23.8	27.2	623.4	72.1	201	386.5	2.94147	6.80968e-06	0.0002912	Up
ATF3	48.5	239.9	12.8	85.6	658.1	182	1812.5	62.9	2.79802	0.00435487	0.0378014	Up
DENND2D	10.8	43.7	31.2	40.3	409.9	296.2	51.3	108.3	2.72011	6.47515e-05	0.00168995	Up
IER5	145.4	113.9	93.5	98.7	422.3	299.2	148	217.3	1.28754	0.000861901	0.0121659	Up
KIF26B	21.5	22.2	16.5	46.3	379.9	35.7	52.4	75.6	2.3307	0.0032474	0.0307821	Up
CAPN13	0	0	0	0	37.1	42.2	2.7	49.5	6.81653	3.67874e-06	0.000189195	Up
KCNF1	0	3.8	0	2	19.4	43.7	2.7	22.1	3.48392	0.00297779	0.0290769	Up
FBXO41	134.6	209.5	113.7	189.4	727	761.4	225.5	237.4	1.58219	0.0015171	0.0181109	Up
SGPP2	32.3	17.1	1.8	12.1	375.2	671.8	17.5	199.9	4.40386	2.71477e-06	0.000149746	Up
INHBB	26.9	27.2	20.2	13.1	198.2	130.3	50.2	474.1	3.30884	9.41497e-07	6.68721e-05	Up
CTSS	129.2	127.2	77	117.9	669.3	317.4	248.5	636.5	2.05645	6.10371e-07	4.84404e-05	Up
BOLA3	43.1	26.6	38.5	34.3	174.7	174	34.9	64.9	1.68286	0.00379418	0.0343131	Up
S100A11	301.6	415.3	502.4	459.4	2849	2809.6	619.3	1320.5	2.17447	6.80788e-06	0.0002912	Up
S100A9	0	20.3	5.5	26.2	327.6	2066.4	137.6	72.9	5.54507	1.13347e-07	1.23295e-05	Up
TGFA	5.4	11.4	3.7	2	190	168.9	11.5	46.1	4.15205	1.11197e-05	0.000434589	Up
DAPL1	0	6.3	3.7	5	35.3	286.1	9.3	8	4.30991	0.000302228	0.00558333	Up
CLDN1	32.3	59.5	33	88.6	516.4	190.7	206.4	874.6	3.03066	3.15002e-07	2.79992e-05	Up
INAVA	16.2	20.3	7.3	7.1	1296.9	769.4	19.1	652.6	5.76299	2.55958e-10	1.13755e-07	Up
ELF3	5.4	20.3	12.8	5	3413.6	4854.9	40.4	1227.6	7.71361	1.2565e-14	3.90898e-11	Up
TRIM46	16.2	8.2	5.5	4	88.8	94.6	9.3	12	2.73582	0.0028891	0.028479	Up
ADORA1	0	7	7.3	6	230	293.3	12.6	18.1	4.61451	1.00874e-05	0.000404348	Up
NUAK2	37.7	32.3	25.7	51.4	512.9	612.1	43.7	298.2	3.31601	1.31841e-06	8.47429e-05	Up
MNDA	32.3	8.9	3.7	7.1	31.2	42.9	25.1	50.1	1.83332	0.00501389	0.0417226	Up
CADPS	0	20.9	23.8	18.1	14.1	197.3	107.6	219.3	3.00037	0.000318683	0.00580653	Up
RBM47	102.3	34.2	36.7	33.2	1362.2	934.6	70.4	376.4	3.78187	7.30207e-07	5.49029e-05	Up
IL17RE	43.1	26.6	20.2	33.2	200.6	370.5	25.1	293.5	2.88413	3.7188e-05	0.00111242	Up
CXCL3	0	3.2	0	2	104.7	2.2	28.9	14	4.43563	0.000696181	0.0103529	Up
CXCL5	0	0.6	0	0	332.9	0.7	1.1	44.8	7.69329	3.75261e-05	0.0011161	Up
CXCL1	0	2.5	0	4	217	1.5	27.9	4.7	4.95865	0.000918063	0.012732	Up
PLB1	0	40.5	16.5	23.2	68.2	291.2	49.1	83.6	2.50612	0.00145577	0.0176607	Up
CDCP1	0	7	1.8	19.1	637	596.1	24.6	179.2	5.51864	3.5932e-08	5.76035e-06	Up
CCR1	32.3	26	18.3	27.2	166.4	61.1	65.5	96.3	1.93759	4.06482e-05	0.00118627	Up
ZC3H12A	102.3	160.8	95.3	103.8	349.4	232.2	404.1	131	1.25978	0.00261908	0.0264888	Up
KLF15	651.6	702.7	1061.7	348.5	59.4	75	387.7	244.7	-1.84924	0.00298101	0.0290901	Down
RPL39L	21.5	36.1	25.7	9.1	187	112.8	20.2	70.9	2.0696	0.00386752	0.0348144	Up
SFMBT1	5.4	37.3	38.5	27.2	184.7	140.5	41	68.2	1.9186	0.00204748	0.0221478	Up
MELTF	10.8	16.5	12.8	42.3	342.3	281	24	70.2	3.07292	0.000186191	0.00384621	Up
ABLIM2	32.3	12	9.2	15.1	71.2	68.4	28.9	34.8	1.73577	0.00201091	0.021874	Up
SGMS2	0	13.9	14.7	23.2	170	54.6	26.8	115.7	2.68682	0.000253906	0.00485794	Up
SPRY1	150.8	177.9	126.5	153.1	569.9	227.1	329.3	282.8	1.20775	0.000635174	0.0096959	Up
MST1R	5.4	13.3	14.7	12.1	180.6	157.2	22.4	271.5	3.71852	2.62899e-07	2.40552e-05	Up
POC1A	5.4	18.4	16.5	20.1	388.2	176.1	14.7	48.1	3.31029	0.000188415	0.00387807	Up
HPGD	0	1.3	0	9.1	167	357.4	2.2	103	5.7111	1.18466e-05	0.000456124	Up
GASK1B	3338.7	2761.2	2706.5	3035.2	374.1	472.4	2076.8	1413.5	-1.44884	0.00633092	0.0491405	Down
F2RL1	0	11.4	5.5	10.1	171.7	49.5	67.2	397.8	4.45814	3.64236e-08	5.76035e-06	Up
ESM1	10.8	8.9	7.3	7.1	161.7	119.4	12.6	133.1	3.69236	1.39464e-06	8.81855e-05	Up
FOXQ1	0	3.8	3.7	0	1728	1543.8	3.3	120.4	8.65358	1.16328e-06	7.75716e-05	Up
SHROOM1	129.2	152.6	111.9	113.8	290	1165.3	145.8	259.4	1.87305	0.0023253	0.0241617	Up
UQCRQ	263.9	358.9	496.9	443.2	1301.6	1388.8	405.7	613.1	1.2414	0.00541048	0.0439478	Up
CITED2	3080.2	4500.1	3087.9	3721.2	587.6	943.3	1911.9	1726.4	-1.4775	0.000222432	0.00439733	Down
DCBLD1	32.3	58.2	58.7	48.4	144.7	163	68.8	220.6	1.55405	0.000352399	0.00619386	Up
GPR85	0	1.9	0	1	8.2	16.7	25.1	43.5	4.36236	6.64791e-05	0.00172347	Up
PTTG1	10.8	3.8	14.7	12.1	198.8	87.3	8.7	31.4	3.01529	0.000956596	0.0130069	Up
FABP5	26.9	88.6	23.8	77.6	195.3	197.3	83	232	1.64737	0.00230705	0.0240595	Up
SHH	0	0	0	0	1.2	18.9	0.5	50.1	5.92307	0.00238689	0.0246698	Up
COL1A2	14275.4	22121.5	11486	15888.1	67137.7	24513.4	27517.6	139928	2.02246	0.000281718	0.00527331	Up
CHMP4C	26.9	4.4	1.8	5	164.1	96.8	4.4	55.5	3.32343	0.0012614	0.0159911	Up
CTSB	4453.3	4552.7	5004	5186.9	39043.6	20141.8	7532.8	9237	1.98419	8.23938e-05	0.00202854	Up
SOX17	296.2	122.2	69.7	126.9	6117.3	2851.1	154	103.6	3.91581	0.000111147	0.00256893	Up
TNFRSF11B	5.4	5.1	3.7	5	581.7	51.7	13.1	84.2	5.26234	4.63678e-07	3.83644e-05	Up
SBSPON	48.5	70.3	16.5	70.5	181.1	86.6	67.7	762.9	2.40553	0.0025274	0.0257289	Up
DEFB1	5.4	2.5	3.7	2	443.5	586.7	1.1	16	6.39303	1.35919e-06	8.66484e-05	Up
TMEM184A	16.2	8.9	16.5	2	148.2	566.3	9.3	149.1	4.40529	9.08666e-06	0.000370419	Up
NOS3	150.8	126.6	84.3	149.1	459.3	257.7	182.4	199.9	1.11353	0.00471374	0.0398871	Up
MICALL2	86.2	47.5	25.7	20.1	280.5	542.3	60.6	308.2	2.79142	3.32334e-05	0.00101893	Up
CDK5	37.7	53.8	29.3	45.3	229.4	257.7	43.1	102.3	1.9096	0.00112483	0.0145685	Up
YWHAZ	2159.4	2794.1	2315.9	2172.9	9723.3	10142.9	2982.8	2227.8	1.40885	0.00538565	0.0438518	Up
FZD6	107.7	121.5	115.5	107.8	582.9	463.7	140.3	127.7	1.53596	0.00408959	0.0362083	Up
CTHRC1	43.1	48.7	25.7	60.4	1148.7	81.5	229.9	303.6	3.30113	5.13212e-06	0.000240452	Up
MYORG	59.2	47.5	14.7	41.3	321.7	587.4	27.3	319.6	2.96712	9.67355e-05	0.00232929	Up
DIRAS2	0	0.6	0	1	50.6	7.3	1.1	12.7	4.67794	0.00172553	0.0197055	Up
SYK	80.8	47.5	58.7	36.3	868.7	312.3	146.9	461.3	3.0432	3.3894e-08	5.49188e-06	Up
TRPV6	0	0	0	4	55.9	67.7	4.4	119.7	5.57045	2.2355e-05	0.000757584	Up
FBP1	21.5	6.3	7.3	5	111.2	232.2	24.6	649.2	4.84715	6.74041e-08	8.59403e-06	Up
CYBB	102.3	105.7	133.9	117.9	561.7	347.2	242.5	420.6	1.76717	5.83945e-08	7.76347e-06	Up
RNF183	10.8	1.9	0	1	104.1	10.2	1.6	16.7	3.76743	0.00594442	0.0471338	Up
VEGFD	75.4	13.3	34.8	23.2	2.4	6.6	12	1.3	-2.63858	0.00152429	0.0181688	Down
STRBP	64.6	75.3	45.8	44.3	278.8	183.4	62.8	104.3	1.45486	0.0048789	0.0408677	Up
CLDN3	0	22.8	27.5	12.1	6060.9	4316.3	65	465.4	7.38722	1.09214e-11	1.11349e-08	Up
AQP3	59.2	74.7	108.2	74.5	132.3	116.5	461.4	175.2	1.47312	0.00408914	0.0362083	Up
PGM2L1	0	36.7	18.3	23.2	185.3	238	33.3	84.9	2.67618	0.000423504	0.00712944	Up
GJB2	0	3.2	1.8	2	416.4	20.4	21.8	84.2	5.98159	1.73933e-07	1.7475e-05	Up
RPL36AL	2175.5	1902.2	2088.5	1476.8	571.7	465.8	1506.7	908	-1.14555	0.00409968	0.0362332	Down
EML5	479.3	653.3	414.4	708.2	14.7	54.6	359.3	53.5	-2.22573	0.00495839	0.0413776	Down
ARF6	500.8	547.6	504.3	529.9	4627	1154.4	596.9	732.8	1.7714	0.00421211	0.0369957	Up
TMEM63C	5.4	16.5	5.5	2	58.8	98.3	7.1	31.4	2.65142	0.0044802	0.03846	Up
FAAH2	0	3.2	1.8	4	102.9	154.3	4.4	22.7	4.72201	2.43925e-05	0.000810737	Up
COMTD1	75.4	93.7	119.2	74.5	424.6	483.3	99.4	109.7	1.61684	0.00515917	0.042563	Up
STK32C	53.8	60.1	84.3	60.4	286.4	220.5	63.3	133.1	1.43453	0.00381252	0.0344421	Up
NDRG2	7215.8	5861.1	6980.7	4996.5	257.6	1265	3827	1541.8	-1.86198	0.00316979	0.0302677	Down
BTNL9	32.3	22.8	23.8	16.1	157	160.9	55.7	57.5	2.24354	2.59924e-05	0.000842315	Up
VWA2	16.2	9.5	5.5	15.1	44.7	88.8	7.6	141.7	2.65327	0.00146513	0.0177355	Up
SALL2	608.5	651.4	715.1	791.8	181.7	188.5	487.1	375.8	-1.16711	0.0020127	0.0218781	Down
TC2N	21.5	65.2	40.3	67.5	180.6	223.5	97.2	105	1.56475	0.000624438	0.00961623	Up
IFI27	446.9	495.7	124.7	189.4	6507.9	2370	286.2	703.4	2.97499	0.000328032	0.00589871	Up
GPT2	80.8	138	80.7	110.8	584	1241.8	93.9	175.2	2.34345	0.000961847	0.0130554	Up
SPINT1	37.7	71.5	75.2	53.4	3882.4	3009.8	92.3	714.1	5.00472	2.00326e-09	6.62994e-07	Up
C2	113.1	143.1	22	94.7	1268.6	2548.3	244.6	593.7	3.64239	5.16744e-07	4.18644e-05	Up
MOGAT2	0	0	0	1	11.2	87.3	0	237.4	7.35552	6.25615e-05	0.00165501	Up
TUB	775.4	583	865.5	779.7	132.3	137.6	487.1	272.1	-1.54371	0.000684665	0.0102502	Down
PLD4	37.7	7	22	25.2	59.4	213.3	28.9	82.2	2.14461	0.00312116	0.0298767	Up
TMEM130	26.9	43.7	7.3	23.2	26.5	248.2	59.5	599.8	3.19534	0.000353471	0.00620569	Up
PRTG	107.7	131.7	78.8	98.7	14.7	13.8	73.7	33.4	-1.61712	0.00593373	0.0470914	Down
CENPN	26.9	10.8	16.5	8.1	68.2	33.5	30	36.1	1.62025	0.00355272	0.0327663	Up
NNMT	107.7	131	40.3	56.4	2227.9	1664.7	459.8	385.1	3.82507	2.37246e-09	7.23599e-07	Up
CIAO2A	70	98.8	88	63.5	258.2	231.5	103.8	158.5	1.21666	0.00148484	0.0178767	Up
PCLAF	0	1.3	0	0	108.2	26.9	1.1	13.4	5.86321	0.000218927	0.00436592	Up
MESP1	21.5	17.7	14.7	20.1	302.3	966.6	13.7	52.2	4.18044	2.20336e-05	0.000751607	Up
ANPEP	21.5	17.1	5.5	16.1	1096.9	3594.2	30.6	7447.1	7.68114	1.30031e-13	2.24737e-10	Up
PLK1	32.3	27.9	34.8	35.3	649.9	88.1	18	62.2	2.65246	0.00337735	0.0317047	Up
TAC3	0	0.6	0	2	0	42.2	1.6	108.3	5.33163	0.00304047	0.0295277	Up
C15orf48	0	3.8	1.8	1	122.9	5.8	3.8	39.4	4.39802	0.000556985	0.00879584	Up
SCG5	5.4	29.8	20.2	18.1	40	68.4	54.1	280.2	2.50434	0.000750475	0.0109304	Up
GREM1	0	0.6	0	3	497	0	3.3	39.4	6.8242	0.00365936	0.0334831	Up
MS4A7	37.7	41.8	14.7	23.2	158.8	80.8	136	96.3	2.02177	5.55203e-06	0.000251784	Up
PRR15L	0	3.8	1.8	8.1	101.2	623.1	3.8	489.4	6.27379	9.83386e-08	1.13174e-05	Up
NOD2	21.5	22.8	27.5	13.1	85.9	151.4	22.9	50.1	1.87918	0.00334127	0.0314075	Up
SNX20	21.5	15.8	12.8	29.2	93.5	49.5	26.2	54.8	1.49888	0.00644184	0.0498359	Up
MYO5B	16.2	26.6	18.3	23.2	735.2	350.8	19.1	262.8	3.99374	8.99843e-07	6.48012e-05	Up
ZNF668	91.5	155.7	104.5	109.8	398.8	265.7	150.7	328.3	1.28643	0.000631691	0.0096617	Up
TPM4	4114.1	5059.7	3317.1	3711.1	10495.5	7781	5531.9	8835.8	1.01042	0.000155789	0.00334247	Up
CDT1	16.2	15.2	5.5	10.1	257.6	101.9	12.6	23.4	3.10143	0.000686031	0.0102529	Up
TUBA1C	603.1	613.4	850.8	514.8	4666.4	1699.6	588.7	1540.5	1.71812	0.00202534	0.0219847	Up
GPD1	0	1.9	3.7	3	1.2	59.7	3.8	151.1	4.48929	0.000922553	0.0127511	Up
CYP2S1	16.2	5.7	3.7	15.1	177.6	305.7	12.6	672	4.91293	1.92335e-07	1.86986e-05	Up
TMC4	10.8	21.5	23.8	16.1	969.9	1575.8	19.1	388.5	5.32236	5.05747e-09	1.31115e-06	Up
LAIR1	80.8	63.9	60.5	55.4	407.6	161.6	192.8	241.4	1.97499	2.1035e-07	1.99316e-05	Up
SPINT2	1631.6	1280.6	2207.7	1758.9	15213.6	8498.7	1678.7	2353.5	2.01203	0.00153662	0.0182181	Up
C19orf33	21.5	2.5	7.3	6	1001.6	320.3	13.7	306.9	5.66283	1.38911e-08	2.70095e-06	Up
SEMA6B	86.2	66.5	53.2	59.4	287	123	148	649.9	2.20487	8.03982e-05	0.00199457	Up
MFSD3	43.1	78.5	82.5	136	3217.8	1609.3	73.7	173.8	3.88879	2.55206e-05	0.000835733	Up
GPT	21.5	17.1	12.8	19.1	195.3	767.9	11.5	40.1	3.85775	0.000106478	0.00248596	Up
KIFC2	199.2	189.3	139.4	176.3	3111.3	1744	122.9	250.7	2.89369	0.000369127	0.00638685	Up
SLC43A2	140	136.1	172.4	210.5	389.4	388.7	312.9	438.6	1.20007	1.08583e-06	7.34354e-05	Up
RILP	37.7	59.5	44	56.4	169.4	147	87.9	207.3	1.58289	2.41637e-05	0.000804853	Up
GGT6	0	10.1	18.3	31.2	339.4	596.1	16.9	376.4	4.39043	2.15583e-06	0.000127023	Up
KLK5	0	0.6	1.8	2	339.9	2053.3	2.7	10	8.80229	1.84138e-06	0.00011145	Up
KLK6	10.8	12.7	18.3	1	1913.8	5174.5	5.5	110.3	7.40389	2.202e-06	0.000129253	Up
KLK11	0	4.4	11	20.1	274.7	1978.4	3.8	36.8	5.95826	0.000260959	0.00496237	Up
KLK13	0	0	0	2	14.7	37.1	4.9	14	4.55602	0.000572347	0.00897465	Up
KRT80	5.4	4.4	11	8.1	669.9	454.9	4.4	54.8	5.34877	1.07992e-06	7.34354e-05	Up
ANGPTL4	48.5	20.9	31.2	13.1	779.3	73.5	49.1	165.8	3.28824	9.91186e-05	0.00236109	Up
CDK2AP2	210	226.6	247.5	237.7	1153.9	1383	261.6	413.9	1.79896	0.000541824	0.00860886	Up
NUDT8	16.2	15.8	25.7	24.2	107	187.8	18	42.8	2.10463	0.00349004	0.0323827	Up
CD300C	0	1.9	3.7	0	55.9	19.7	10.9	11.4	3.96763	0.00031759	0.00579942	Up
CD300A	26.9	22.8	18.3	16.1	331.7	88.8	53	88.3	2.77196	1.6631e-05	0.000596072	Up
HID1	102.3	91.8	34.8	69.5	2300.8	986.3	55.2	534.9	3.70696	5.97187e-06	0.000267381	Up
EVPL	21.5	8.2	11	21.2	1509.2	813	21.8	263.4	5.43458	4.95594e-09	1.3066e-06	Up
TK1	5.4	22.2	12.8	8.1	1462.7	231.5	24	84.9	5.15728	6.25679e-07	4.93773e-05	Up
CCDC88B	43.1	71.5	64.2	69.5	228.8	299.2	81.9	138.4	1.55983	0.000724303	0.0106792	Up
PBK	0	1.9	0	0	93.5	16.7	1.6	16	5.27691	0.000580048	0.00905888	Up
KIF5C	37.7	82.9	73.3	63.5	96.5	254.8	187.3	648.6	2.17869	0.000207573	0.00418239	Up
CX3CR1	48.5	46.2	58.7	49.4	83.5	364.7	49.7	157.1	1.69088	0.00560695	0.0451113	Up
HR	21.5	15.2	3.7	3	102.9	98.3	11.5	397.8	3.91397	5.65237e-05	0.00152221	Up
REEP4	70	126	119.2	113.8	784	278	115.8	259.4	1.72948	0.00212222	0.0227074	Up
FEN1	48.5	63.3	62.3	80.6	866.3	290.4	83	96.3	2.38016	0.0008667	0.0122226	Up
SERINC2	10.8	22.2	23.8	9.1	480.5	531.3	2.7	595.1	4.58909	5.33476e-06	0.000246238	Up
COL3A1	6149.6	9498.4	5075.5	7923.9	63442.9	10958.9	13789.9	68929.5	2.45526	4.69031e-05	0.00133868	Up
LRATD2	140	147.5	154	163.2	1995	935.3	110.9	386.5	2.50142	0.000336897	0.00599221	Up
LRP1B	0	9.5	7.3	4	181.1	22.6	23.5	3.3	3.32123	0.00354872	0.0327599	Up
PLA2G4F	0	0	0	0	1.2	31.3	0	62.2	6.34274	0.00386991	0.0348158	Up
INPP5D	145.4	134.8	88	106.8	245.8	832.7	116.9	280.8	1.64144	0.00419657	0.0369009	Up
LGALS9	253.1	417.2	187	325.4	723.4	947	424.3	817.7	1.28991	0.000391193	0.00670155	Up
PXDC1	247.7	343.7	333.7	217.6	742.2	302.1	510.1	914	1.10698	0.00442125	0.0381434	Up
KLK7	0	8.9	16.5	3	2285	6805.6	3.8	33.4	8.28472	4.3646e-06	0.000216905	Up
RGS14	70	86.1	44	64.5	339.4	342.8	75.9	78.9	1.65841	0.00553593	0.0446867	Up
SLC50A1	80.8	115.2	144.9	133	829.9	850.2	137.6	199.2	2.08023	0.000625503	0.00961623	Up
EFNA1	188.5	174.7	157.7	200.5	634	724.2	316.7	490.8	1.58727	4.76283e-07	3.91989e-05	Up
SH3TC2	0	1.3	1.8	2	5.9	45.1	6	20.1	3.63784	0.00124676	0.0158831	Up
GPRIN1	5.4	3.2	0	3	64.1	26.2	6	32.8	3.60941	0.000247997	0.0047861	Up
PTAFR	53.8	38	38.5	49.4	345.2	589.6	123.4	192.6	2.81852	5.74791e-08	7.70766e-06	Up
RNASE6	26.9	22.8	12.8	23.2	68.8	88.8	47	70.9	1.70685	2.49531e-05	0.000822342	Up
SCN9A	5.4	5.7	11	4	52.3	96.1	20.2	20.1	2.86976	0.000171003	0.00360717	Up
GJB1	0	9.5	16.5	1	253.5	777.4	3.3	246.7	5.48622	4.55661e-06	0.000222189	Up
CLIC3	0	4.4	0	15.1	319.4	97.5	10.9	78.9	4.50996	6.31758e-05	0.00166277	Up
BOLA2B	43.1	51.9	77	34.3	394.6	326.1	54.6	119	2.11232	0.000772741	0.0111814	Up
BUB1	5.4	7	7.3	3	286.4	34.9	5.5	37.4	4.00374	0.00016876	0.0035715	Up
RAC3	32.3	74.7	14.7	30.2	505.8	72.8	24	169.2	2.32558	0.00646767	0.0499279	Up
LIMS1	323.1	332.3	243.9	240.8	978.7	390.9	447.8	638.5	1.11101	0.00171649	0.0196612	Up
PCDH7	16.2	126.6	47.7	23.2	607	1967.4	47.5	242	3.71845	9.05446e-05	0.00220756	Up
P2RY1	328.5	217.8	212.7	200.5	44.7	36.4	145.8	80.2	-1.63073	0.000684509	0.0102502	Down
MUC3A	0	0.6	0	0	0.6	179.8	1.6	667.3	8.86199	0.000166947	0.00353796	Up
ITGAM	48.5	77.2	60.5	49.4	336.4	146.3	119	241.4	1.81572	2.18197e-05	0.000749719	Up
TM4SF1	565.4	456.4	300.7	379.8	1558.6	1815.3	584.3	811.7	1.49195	0.000370797	0.0064086	Up
NIPA1	48.5	60.8	53.2	29.2	181.7	141.9	61.7	126.4	1.41715	0.00149783	0.0179775	Up
GLB1	350	473.5	573.9	430.1	1376.9	1396.8	457.6	1006.9	1.20911	0.00180873	0.0203727	Up
CMTM8	0	7.6	0	8.1	110	186.3	7.6	38.8	4.20814	0.000131263	0.00291686	Up
B3GNT2	113.1	102.5	88	72.5	320	410.5	171.5	289.5	1.68268	1.20344e-06	7.89853e-05	Up
CST1	0	0.6	0	0	5.9	14.6	1.1	56.2	5.39783	0.000951112	0.0129777	Up
KRT8	70	310.2	170.5	236.7	11912.9	8405.5	341.9	10699.3	5.30653	3.63759e-11	2.32828e-08	Up
METTL7B	0	0.6	3.7	1	177.6	307.2	2.2	101.6	6.67813	1.20759e-07	1.29545e-05	Up
CD14	463.1	448.2	304.4	380.8	2212.6	834.9	1278.9	1952.4	1.97879	2.75993e-08	4.71766e-06	Up
NPAS2	21.5	89.3	40.3	70.5	325.8	186.3	81.9	240	1.85317	0.000676553	0.0101777	Up
SERPINB9	37.7	49.4	45.8	40.3	118.8	222.7	62.8	122.4	1.58477	0.000434863	0.00729697	Up
EMB	53.8	20.9	7.3	12.1	80	252.6	43.7	109	2.50012	0.000512109	0.00822069	Up
KCNS3	43.1	26	16.5	15.1	131.7	321.7	14.7	48.8	2.4124	0.00387594	0.0348498	Up
GPR37	0	3.8	1.8	2	68.2	52.4	4.9	3.3	3.7952	0.0016805	0.0193488	Up
CEL	86.2	410.2	58.7	122.9	9.4	42.9	70.4	28.8	-2.17333	0.0035183	0.0325672	Down
PPM1D	430.8	321.6	375.9	303.2	132.9	133.9	220.6	178.5	-1.08945	4.50268e-05	0.00129224	Down
HS6ST2	366.2	234.8	427.2	171.3	28.2	42.9	136.5	86.9	-2.01822	0.000203108	0.00411909	Down
LRRC8E	0	1.3	1.8	3	234.1	174	5.5	20.7	5.89776	9.77215e-07	6.84711e-05	Up
FPR1	10.8	21.5	9.2	8.1	251.1	66.2	154.5	76.9	3.40633	4.40132e-08	6.58293e-06	Up
ALK	0	8.2	3.7	1	240	141.2	1.1	1.3	4.72991	0.00135766	0.0168947	Up
FUT3	0	0	1.8	0	52.3	53.1	0.5	238	7.40745	4.72204e-06	0.000227404	Up
ATP6V0E2	145.4	126.6	176	147.1	1081.6	1602.1	163.8	294.9	2.40119	0.000191473	0.00391889	Up
C9orf16	285.4	322.8	300.7	248.8	814.6	775.9	325.5	443.3	1.02604	0.0036618	0.0334857	Up
ZNF672	226.2	376	315.4	347.5	1319.8	973.9	377.3	411.9	1.27787	0.0052464	0.0429967	Up
FAM241B	26.9	12.7	5.5	12.1	78.2	100.4	20.8	41.5	2.20998	0.000924981	0.0127561	Up
UGT2B7	0	0.6	1.8	1	60	81.5	0	24.7	5.29738	0.000376771	0.00649022	Up
LRG1	10.8	8.2	0	9.1	165.9	96.8	38.8	45.5	3.66639	1.59766e-06	9.90102e-05	Up
SHCBP1	5.4	10.8	1.8	5	106.5	51	28.4	20.7	3.06407	0.000107011	0.00249045	Up
GAA	500.8	791.9	410.7	470.4	1472.7	1350.9	867.2	2297.4	1.45821	7.99849e-05	0.00198749	Up
CHD7	107.7	77.2	64.2	42.3	592.9	345	65.5	125	1.97461	0.00278224	0.027583	Up
KRT19	2110.9	1349	2513.9	1342.8	8769.3	19780.7	1050.7	3629.9	2.18369	0.00214403	0.0228874	Up
APLN	70	39.9	88	62.5	204.1	551.7	91.7	1128	2.93245	2.39416e-05	0.000802612	Up
HOPX	26.9	70.9	49.5	110.8	282.9	299.9	378.4	643.2	2.57665	2.68551e-08	4.64146e-06	Up
PTGER4	26.9	39.9	12.8	12.1	150	66.2	64.4	149.1	2.22009	9.84584e-05	0.00235594	Up
BCL2L1	522.3	516.5	419.9	387.8	2317.9	2638.5	468.5	1091.2	1.82047	0.000301802	0.00558208	Up
CXXC5	183.1	100.6	56.8	74.5	4458.7	3169.9	130	275.5	4.28723	2.30018e-06	0.000133505	Up
SLC25A33	59.2	58.2	40.3	49.4	222.9	315.9	116.9	66.2	1.80773	0.000497766	0.00805697	Up
ENC1	376.9	633.7	361.2	710.2	1236.9	1462.3	1007.5	4618.2	1.99554	0.000175087	0.00367046	Up
P2RY6	5.4	16.5	11	17.1	331.7	428.7	15.3	49.5	3.97399	1.49244e-05	0.000546231	Up
RGS19	37.7	42.4	31.2	44.3	710.5	304.3	84.6	141.1	2.98762	3.19303e-06	0.000169514	Up
COL8A2	102.3	93.7	126.5	92.7	282.3	240.2	180.2	678.7	1.73681	0.000159106	0.00339491	Up
ANGPTL7	32.3	5.1	7.3	2	1.2	0	0	0.7	-4.47637	0.00199465	0.0217275	Down
NINJ2	0	5.7	3.7	0	15.3	40.8	8.7	38.8	3.20502	0.00227195	0.0238463	Up
RRM2	16.2	11.4	3.7	2	599.9	100.4	6	60.2	4.62638	3.50838e-05	0.00105967	Up
C3AR1	86.2	68.4	36.7	39.3	247	179.8	164.9	236.7	1.90534	9.27577e-08	1.10976e-05	Up
CYP4F11	5.4	1.3	3.7	0	148.2	481.9	4.4	4.7	6.29536	1.12629e-05	0.000439084	Up
SCG2	5.4	21.5	3.7	9.1	27.1	13.1	68.8	209.3	2.90698	0.00188222	0.020985	Up
ZNF556	86.2	67.7	80.7	107.8	28.2	37.8	36	36.1	-1.30684	1.88888e-05	0.000667761	Down
GAP43	0	0	0	2	14.1	4.4	3.8	54.8	4.66569	0.00212176	0.0227074	Up
EPHX4	0	1.3	0	0	68.8	51.7	2.2	12.7	5.70653	0.000105388	0.00247257	Up
CYCS	258.5	272.8	168.7	181.3	381.7	643.4	634	308.2	1.16401	0.000812673	0.0116723	Up
CCL11	0	2.5	0	1	75.9	1.5	2.2	16	4.2492	0.00546802	0.0442362	Up
ID4	441.6	995.1	199.9	418.1	2166.1	2613.8	837.2	1336.6	1.75516	0.00104988	0.0139342	Up
CLEC7A	5.4	9.5	5.5	14.1	46.5	51.7	19.7	28.1	1.95743	0.00119766	0.0153583	Up
ABCG4	0	3.8	1.8	1	19.4	49.5	3.8	8.7	3.29023	0.00409315	0.0362083	Up
C2CD2L	96.9	148.1	99	126.9	214.7	677.7	162.7	198.6	1.40029	0.00616748	0.0483607	Up
MAB21L4	0	0	0	0	112.9	210.4	0	24.7	8.2219	0.00442111	0.0381434	Up
PPP1CA	549.3	549.5	476.7	503.7	3340.1	2130.5	571.8	939.4	1.74799	0.000674954	0.0101734	Up
COL6A5	0	3.2	0	0	87	13.8	37.1	9.4	4.90194	0.000136742	0.00301086	Up
CFL1	2703.2	3307.5	2893.5	3290	12618.1	7652.2	3380.3	6319.8	1.29687	0.000860839	0.0121641	Up
OVOL1	5.4	0	0	2	139.4	69.1	3.3	112.3	6.13969	2.76168e-06	0.00015126	Up
CES3	0	10.1	18.3	4	103.5	344.3	4.9	88.3	3.96918	0.000176683	0.00369894	Up
MYD88	398.5	453.2	418.1	358.6	1257.5	925.1	472.9	694.7	1.03981	0.00189411	0.020985	Up
HSPA6	70	74.7	89.8	72.5	547	238.7	203.7	357	2.12787	3.86752e-08	5.95636e-06	Up
ESRRA	118.5	241.2	133.9	118.9	1235.1	1379.3	172	668	2.48704	2.55114e-05	0.000835733	Up
GLRX	53.8	63.9	66	62.5	161.2	274.4	87.9	185.2	1.50977	0.000177259	0.00370599	Up
SYT12	10.8	1.9	1.8	5	370.5	561.9	3.8	28.1	5.83299	1.31315e-06	8.47429e-05	Up
SNCG	479.3	223.5	361.2	367.7	799.9	5623.6	490.9	251.4	2.32588	0.00483921	0.0406666	Up
TRIB1	70	126.6	47.7	79.6	507.6	451.3	417.8	214.6	2.26907	4.66265e-08	6.84221e-06	Up
C1QB	312.3	310.8	207.2	261.9	2158.5	1318.9	1266.4	1265	2.4649	2.35324e-18	3.66047e-14	Up
C1QA	533.1	470.3	357.6	416	2361.4	1292	1420.4	1781.9	1.95491	7.15796e-13	1.0122e-09	Up
OLR1	0	0.6	0	1	30	16	2.7	15.4	4.51399	0.000475564	0.00778674	Up
PPP1R14B	166.9	315.2	225.5	324.4	1856.8	846.5	236.5	431.9	1.70106	0.00428623	0.0374985	Up
LRFN4	145.4	180.4	154	124.9	1615.6	522.6	155.6	179.9	2.03124	0.00333831	0.0314075	Up
ADGRG2	5.4	12.7	18.3	1	307	984.8	0.5	4.7	5.10307	0.00312367	0.0298823	Up
C11orf80	26.9	48.7	45.8	55.4	193.5	225.6	65.5	69.5	1.60648	0.00239283	0.0247073	Up
JUP	1577.8	1526.2	1413.7	1164.5	3461.3	6685.5	1840.9	2415.1	1.34243	0.00123087	0.0157065	Up
GPR160	0	1.9	5.5	6	40.6	21.8	3.3	122.4	3.66279	0.000860988	0.0121641	Up
SPTBN2	86.2	178.5	77	101.7	3622.4	3209.2	80.3	199.9	3.99798	2.10579e-05	0.000729524	Up
ZDHHC24	123.9	167.1	157.7	206.5	623.4	536.4	199.9	297.5	1.32551	0.0014006	0.0172361	Up
SLC26A9	0	1.9	0	6	39.4	198.7	2.2	1.3	4.69033	0.00234186	0.0243013	Up
GOLT1A	0	0	0	0	10	86.6	0.5	42.8	6.90644	8.19436e-05	0.00202323	Up
UGT8	5.4	6.3	3.7	2	88.8	48.8	5.5	106.3	3.86187	3.74093e-05	0.0011161	Up
SLC29A2	21.5	14.6	18.3	16.1	482.3	274.4	20.8	55.5	3.58808	2.16628e-05	0.000747617	Up
RESF1	1077	1464.8	1003	1394.2	414.6	453.5	719.2	850.5	-1.02096	0.00110925	0.0144509	Down
SEZ6L2	118.5	248.1	34.8	162.2	482.9	453.5	226.6	1497.7	2.22987	0.00108358	0.0142236	Up
ASPHD1	0	24.1	18.3	29.2	444.1	94.6	35.5	139.7	3.21865	0.000112078	0.00257896	Up
FUT1	10.8	18.4	14.7	16.1	81.2	67	13.7	53.5	1.78878	0.00449522	0.038504	Up
GRAMD2A	10.8	0.6	3.7	2	31.8	206.7	4.9	25.4	4.35402	0.000250339	0.00482241	Up
SCUBE2	10.8	11.4	31.2	9.1	95.9	32.8	24.6	555	3.50002	0.000276188	0.00518228	Up
LRRC25	16.2	28.5	23.8	19.1	180	50.2	101.6	144.4	2.39214	1.96057e-06	0.000116399	Up
CABP4	5.4	3.8	0	1	50	99	1.1	2.7	4.07577	0.00409279	0.0362083	Up
UCP2	91.5	84.2	71.5	72.5	1583.9	1832.8	146.9	342.3	3.6151	1.96275e-07	1.8846e-05	Up
P2RY2	10.8	9.5	20.2	15.1	228.2	153.6	9.3	20.7	2.8818	0.00177954	0.0201026	Up
KDF1	10.8	5.1	3.7	14.1	541.1	228.6	6.6	73.5	4.6864	4.88446e-06	0.000232348	Up
SFN	0	3.8	1.8	1	449.3	461.5	4.4	109.7	6.96071	8.10546e-09	1.70379e-06	Up
ETV4	5.4	1.3	1.8	1	1039.3	1206.1	4.9	72.9	8.32635	1.7956e-10	8.21485e-08	Up
ARL4D	333.9	408.3	300.7	289.1	1053.4	1376.4	267	960.8	1.45631	0.00174283	0.019817	Up
DOK7	0	8.9	16.5	13.1	843.4	1329.1	5.5	40.1	5.77784	2.29972e-06	0.000133505	Up
CRYBG2	0	0.6	0	0	81.2	67.7	1.1	34.8	6.64489	1.0112e-05	0.000404348	Up
EID2B	53.8	55.7	78.8	109.8	34.7	26.9	44.2	30.1	-1.15674	0.00246401	0.0252839	Down
SLCO3A1	210	141.2	126.5	148.1	826.9	700.9	273	401.8	1.83336	6.49567e-06	0.00028462	Up
SGF29	339.2	419.7	643.6	417	124.7	123	332	163.8	-1.29348	0.00165666	0.0191168	Down
RNF152	91.5	62.7	40.3	26.2	243.5	489.1	84.1	116.3	2.11878	0.000774835	0.0112013	Up
CDK5R1	129.2	109.5	121	115.8	30.6	42.9	91.2	24.7	-1.31867	0.0044654	0.0383541	Down
NCKAP5	91.5	103.8	104.5	86.6	22.3	15.3	54.1	16.7	-1.82896	0.00015993	0.00340783	Down
IRX5	5.4	5.7	3.7	3	150.6	946.2	2.2	10	5.982	6.16303e-06	0.000273122	Up
TYMS	53.8	30.4	71.5	35.3	552.9	95.4	56.2	123	2.13169	0.00310091	0.0297866	Up
FUT2	37.7	25.3	36.7	43.3	135.3	711.1	18.6	316.9	3.0519	0.000218059	0.00435418	Up
MUC20	199.2	119	152.2	252.8	479.9	898.9	117.4	607.1	1.54252	0.00598794	0.0474031	Up
DPP7	463.1	688.1	806.8	427.1	2500.2	1005.9	708.3	1906.9	1.35753	0.00240251	0.0247491	Up
FZD8	113.1	130.4	34.8	75.6	785.8	333.4	151.8	252.7	2.11133	0.000341553	0.00602365	Up
ZBED2	5.4	3.2	7.3	4	482.9	100.4	4.9	3.3	4.93195	9.87195e-05	0.00235594	Up
IRX3	10.8	11.4	11	9.1	529.3	2834.3	12	22.7	6.3321	1.74132e-07	1.7475e-05	Up
CD163	306.9	186.7	130.2	173.3	1351	479.7	727.9	766.9	2.08295	2.84595e-07	2.57376e-05	Up
AGTRAP	188.5	220.9	254.9	214.6	1139.2	610	284.5	371.8	1.44892	0.00136964	0.0169895	Up
CD163L1	21.5	19	9.2	2	54.1	19.7	36.6	163.8	2.47859	0.00376218	0.0341428	Up
CRACR2B	32.3	33.5	40.3	38.3	250	182	23.5	184.5	2.14028	0.000778044	0.0112268	Up
GRAMD1C	5.4	8.2	7.3	4	16.5	52.4	16.4	29.4	2.15673	0.00194508	0.021367	Up
HTR1A	16.2	1.9	31.2	7.1	0	0	2.2	0	-4.57925	0.00288311	0.028438	Down
DNAJC22	0	8.9	1.8	8.1	56.5	37.1	7.1	82.2	3.03487	0.00100902	0.0135188	Up
CTXN1	37.7	143.7	55	125.9	784	551	132.2	402.5	2.33525	0.000102372	0.00241272	Up
SLC25A20	91.5	95	71.5	71.5	175.3	266.4	92.8	248.7	1.25405	0.00166122	0.0191551	Up
COX5A	236.9	248.8	225.5	210.5	970.4	991.4	219.5	423.9	1.49921	0.00176377	0.0199821	Up
ERFE	0	0.6	1.8	1	52.9	16.7	3.8	3.3	4.20308	0.00157574	0.0185041	Up
CPNE7	5.4	2.5	1.8	2	32.9	29.1	2.7	42.1	3.39497	0.000747861	0.0109025	Up
OPLAH	113.1	145	71.5	137	828.7	746.1	131.1	226	2.04483	0.000618145	0.0095579	Up
TMEM139	10.8	5.7	5.5	7.1	425.8	928.8	8.7	165.8	5.79322	7.07504e-09	1.64216e-06	Up
EXOSC4	145.4	208.3	157.7	173.3	1552.7	719.1	208.6	232	1.98186	0.00141068	0.017319	Up
AURKB	5.4	2.5	1.8	3	259.4	38.6	3.3	27.4	4.82197	4.03912e-05	0.00118099	Up
KLHDC7A	5.4	0	0	0	4.7	120.8	0	43.5	6.33669	0.00160322	0.0187504	Up
TMEM125	16.2	41.8	33	7.1	405.2	331.2	9.8	217.3	3.27376	0.000265932	0.00502738	Up
CALR	4081.8	3777.9	5315.7	5118.4	11772.4	14155.7	4849.8	7084	1.04922	0.0044135	0.03814	Up
VWA1	452.3	681.1	584.9	641.7	5957.4	5219.6	761.3	2125.5	2.57292	5.30505e-06	0.00024598	Up
FJX1	53.8	226	55	145.1	554	657.3	824.1	1258.3	2.74526	1.26063e-07	1.34309e-05	Up
CIITA	183.1	246.2	139.4	207.5	1168.7	4186.7	273.6	458	2.96907	5.61275e-05	0.00151837	Up
ZBTB42	86.2	81.7	62.3	47.3	829.9	156.5	80.3	139.7	2.12919	0.00262413	0.0265054	Up
APOBEC3B	5.4	3.8	1.8	6	138.2	25.5	14.7	26.7	3.61065	9.43767e-05	0.00229022	Up
PIPOX	32.3	19.6	9.2	15.1	193.5	882.9	14.7	30.1	3.92016	0.000156448	0.00335199	Up
MROH1	253.1	305.7	297.1	309.3	2213.2	1538.7	297.1	506.8	1.96502	0.000693378	0.0103309	Up
CITED4	134.6	71.5	108.2	122.9	565.8	1419.4	101	128.4	2.34691	0.00186831	0.0208925	Up
ABCA13	5.4	1.3	0	2	23.5	28.4	3.8	13.4	3.41555	0.00154888	0.0183094	Up
PDXDC1	737.7	848.2	784.8	692.1	1580.4	3091.3	764.5	1387.4	1.15499	0.00522804	0.0428914	Up
B3GNT3	5.4	4.4	0	4	435.8	177.6	6.6	258.1	6.02511	2.0005e-08	3.53612e-06	Up
NRXN1	64.6	8.9	20.2	0	0.6	1.5	1.1	0	-4.82976	0.000880368	0.0123142	Down
PUF60	1071.6	1270.5	1393.6	1234	10663.1	5183.9	1232.5	1385.4	1.8932	0.00292818	0.0287731	Up
C3orf80	5.4	5.1	0	2	102.3	3.6	8.7	12.7	3.41809	0.00626468	0.0487571	Up
ZNRF2	59.2	50	42.2	40.3	162.9	139	71.5	111	1.37012	0.000221861	0.00439623	Up
HCLS1	150.8	115.2	77	101.7	451.7	329	241.4	395.8	1.70499	7.13309e-08	8.80597e-06	Up
ARHGAP45	204.6	200.7	135.7	212.6	569.9	450.6	265.9	450.7	1.2059	0.000123207	0.00276949	Up
HOXC9	10.8	63.3	58.7	67.5	8.8	3.6	3.3	22.1	-2.44745	0.00155579	0.018361	Down
PPA1	382.3	374.7	432.7	423.1	1126.3	2724.4	450.5	484.8	1.56861	0.0053588	0.0437106	Up
CUEDC1	306.9	286.1	218.2	245.8	1100.4	1883.7	266.5	560.3	1.85233	0.000667342	0.0101107	Up
FAM83H	16.2	43	22	42.3	6754.9	2382.3	43.1	336.3	6.24252	1.91572e-09	6.47806e-07	Up
MRPL14	113.1	145.6	121	138	889.3	593.2	150.2	238.7	1.84782	0.000673814	0.010166	Up
NQO1	91.5	69.6	53.2	66.5	164.1	1732.3	61.2	548.3	3.16561	0.000117348	0.00267255	Up
MAPK15	10.8	10.8	3.7	2	452.3	101.9	3.3	10	4.4317	0.000313073	0.00574275	Up
F2R	123.9	116.5	38.5	60.4	278.2	168.9	201.5	854.5	2.16183	0.000441879	0.00737493	Up
MUC16	26.9	22.2	22	29.2	10662.5	8715.6	32.2	16	7.59912	9.88736e-07	6.89676e-05	Up
NPM1	10586.8	8814.8	11808.7	9729.1	3142.5	3982.2	8110.6	4914.4	-1.02258	0.00186178	0.0208495	Down
PENK	274.6	224.7	441.9	49.4	0.6	5.1	16.4	6	-5.12997	5.59576e-10	2.23185e-07	Down
C4orf50	0	3.8	1.8	5	8.2	37.8	2.7	147.8	3.98231	0.00122696	0.0156694	Up
FRAT2	75.4	79.1	58.7	69.5	265.3	226.4	92.3	159.1	1.39473	0.000450098	0.00747201	Up
TMEM102	21.5	36.1	5.5	11.1	153.5	112.1	15.3	90.9	2.3103	0.00314184	0.0300192	Up
TMEM132E	26.9	12	9.2	9.1	15.3	34.9	86.3	431.9	3.40328	0.000326242	0.00589158	Up
SYNE4	0	0.6	1.8	4	303.5	142.7	7.1	3.3	5.91627	1.41604e-05	0.00052695	Up
AATK	91.5	49.4	45.8	64.5	214.7	135.4	116.9	371.8	1.78122	0.000133283	0.00295751	Up
SLX1B	80.8	222.8	66	167.2	727.5	446.2	268.7	545.6	1.86219	0.000113914	0.00260917	Up
P2RY13	5.4	8.9	3.7	4	11.2	27.7	18.6	34.1	1.98153	0.00482505	0.0406134	Up
TNFSF15	0	1.9	1.8	5	31.2	24	10.9	64.2	3.62286	7.04036e-05	0.0018012	Up
PHLDA2	48.5	21.5	5.5	14.1	149.4	449.8	25.1	37.4	2.96312	0.00136148	0.0169287	Up
ATG9B	0	1.9	5.5	6	37.6	142.7	2.7	12	3.72274	0.0016503	0.0190858	Up
CLDN7	10.8	10.1	14.7	8.1	1560.4	1574.4	38.2	735.5	6.49826	4.08484e-14	1.05899e-10	Up
MRPS11	107.7	166.5	139.4	129.9	465.2	385	142	275.5	1.20728	0.00293369	0.0287784	Up
IDH2	387.7	382.3	320.9	245.8	2843.1	5748	342.9	844.5	2.87218	5.36391e-05	0.00147674	Up
TMEM30B	70	44.3	95.3	55.4	598.7	286.8	38.8	272.8	2.18398	0.00129098	0.0162732	Up
KCNIP1	0	7	1.8	7.1	8.8	56.8	19.1	107.6	3.34951	0.00060317	0.00936358	Up
ZNF708	140	103.2	113.7	134	34.1	34.2	73.2	44.1	-1.38578	0.0001116	0.00257556	Down
EXT1	398.5	507	418.1	327.4	1089.8	821.8	403	1272.4	1.11793	0.00340361	0.0318999	Up
BACE2	220.8	255.7	212.7	198.5	1361	1035.8	253.9	742.8	1.93371	4.38203e-05	0.00126696	Up
FBXL6	43.1	56.3	47.7	51.4	614	484	50.2	107.6	2.6528	0.000193527	0.00395054	Up
CAPN12	0	4.4	12.8	4	168.8	163	0.5	7.4	3.92035	0.00320873	0.0305457	Up
KPNA2	75.4	76	45.8	43.3	1275.1	698	93.9	206.6	3.24951	5.43833e-06	0.000248074	Up
LIMK2	463.1	584.9	594.1	490.6	1950.3	1062	598.5	1135.3	1.15153	0.00188239	0.020985	Up
CSF1R	436.2	407.7	275	328.4	1362.7	796.3	966.6	1506.4	1.6851	1.26226e-08	2.48538e-06	Up
TRAK1	328.5	300.1	232.9	257.9	895.2	820.3	338.6	650.6	1.27853	0.000230167	0.00453197	Up
ANXA2	2848.6	2895.4	2730.3	2875	19364.8	8034.3	2694.4	6982.4	1.70786	0.000930654	0.0128051	Up
PAQR7	1082.4	1483.8	1366.1	1616.8	250.6	413.4	1004.3	553.6	-1.32169	0.00188183	0.020985	Down
C1orf116	0	2.5	3.7	4	234.1	625.2	2.7	504.8	6.88261	3.41322e-09	9.56763e-07	Up
ADGRG3	5.4	2.5	3.7	1	9.4	30.6	13.7	35.4	3.09104	0.000467086	0.00767214	Up
ZNF662	150.8	201.9	232.9	200.5	117.6	51.7	96.7	128.4	-1.00586	0.00388493	0.0349105	Down
CADM1	193.9	229.8	168.7	167.2	567	725	233.7	292.9	1.25808	0.00230369	0.0240595	Up
PYCR1	118.5	198.8	55	119.9	1535.1	790.5	175.8	976.2	2.81422	5.42485e-06	0.000248074	Up
SPNS2	123.9	65.2	22	69.5	150	211.1	109.8	372.4	1.62912	0.00377061	0.0341905	Up
SLC25A10	86.2	79.1	84.3	96.7	1169.8	572.1	65.5	205.9	2.53929	0.000391148	0.00670155	Up
GJD3	48.5	60.1	16.5	28.2	83.5	208.2	45.9	176.5	1.75041	0.00403335	0.0358712	Up
RABIF	43.1	43	45.8	53.4	174.1	164.5	74.8	88.9	1.42805	0.000399919	0.00682847	Up
TMEM119	16.2	13.3	11	20.1	160	85.2	8.2	101	2.54886	0.00107323	0.0141476	Up
SMDT1	565.4	802	1004.8	1091	167	350.1	539	412.5	-1.24111	0.00188651	0.020985	Down
CHST6	0	3.8	0	1	66.5	176.1	3.8	18.7	5.31749	4.70184e-05	0.00133951	Up
EPHA10	0	0	3.7	0	3.5	96.8	0	95.6	5.57575	0.00374519	0.0340283	Up
RIPK4	0	5.7	14.7	5	419.3	578.7	8.2	126.4	5.38482	2.27863e-07	2.1224e-05	Up
GPR132	5.4	15.2	14.7	16.1	130	48	24	35.4	2.11493	0.00174765	0.0198574	Up
MX2	102.3	134.8	97.2	82.6	434.6	785.4	117.4	248.1	1.92371	0.000501562	0.00810156	Up
OPCML	53.8	20.9	1.8	9.1	0.6	0.7	6	1.3	-3.19828	0.00521133	0.0427769	Down
ASCL2	10.8	5.1	0	5	54.1	34.2	6	184.5	3.89234	0.000266718	0.00503495	Up
MACC1	0	0.6	1.8	2	270	585.2	0.5	113	7.50137	7.08572e-08	8.80597e-06	Up
EMILIN3	587	477.3	744.5	372.7	30	92.4	339.7	125	-1.89156	0.00272294	0.0271509	Down
GPR39	0	0.6	0	1	87	26.2	4.4	57.5	5.96429	3.58424e-06	0.000185843	Up
FAM3B	0	4.4	3.7	0	62.9	335.6	1.1	460	6.52829	2.68198e-06	0.000148837	Up
IQGAP3	10.8	3.2	0	0	604.6	83.7	8.2	68.2	6.21169	3.72443e-06	0.000190571	Up
PRKX	188.5	122.2	141.2	82.6	692.8	4686.1	144.2	169.8	3.41894	0.000239855	0.0046679	Up
TMPRSS2	5.4	0	7.3	0	16.5	277.3	2.2	445.3	6.0089	0.00160613	0.0187568	Up
ADAP2	70	41.1	42.2	43.3	271.1	133.2	93.9	120.4	1.70922	9.98816e-05	0.00237562	Up
KCNQ3	5.4	6.3	5.5	5	266.4	34.9	14.2	36.8	3.97405	3.25412e-05	0.00100432	Up
PGP	80.8	57.6	44	63.5	428.2	301.3	80.8	179.2	2.03013	0.000107111	0.00249045	Up
IRAK1	667.7	679.9	680.3	632.6	3731.8	4405.1	782	1630.8	1.98744	7.06876e-05	0.00180549	Up
TACSTD2	10.8	45.6	36.7	26.2	3277.7	6374.7	93.9	452.7	6.38576	3.76039e-11	2.32828e-08	Up
PKP3	5.4	6.3	18.3	1	1460.4	827.6	7.6	406.5	6.45118	7.64014e-09	1.67384e-06	Up
NCMAP	0	0.6	1.8	0	24.7	16	0.5	42.8	4.81039	0.000982035	0.01326	Up
TMEM255B	37.7	40.5	45.8	25.2	90	65.5	71.5	171.8	1.42696	0.00171452	0.0196532	Up
DUSP8	32.3	23.4	7.3	15.1	136.5	34.9	47.5	92.3	2.06663	0.000848832	0.0120602	Up
SOCS3	350	857.1	104.5	341.5	4124.1	723.5	12276.7	1159.4	3.46519	4.53617e-05	0.00129945	Up
LPAR5	16.2	31	36.7	25.2	137	122.3	50.2	130.4	1.95409	1.91145e-05	0.000674208	Up
CDCA2	0	1.3	1.8	0	90.6	10.2	0.5	8.7	4.80602	0.00218048	0.0231467	Up
LRRC26	0	1.3	0	0	38.2	294.8	0	71.5	7.34315	0.00225544	0.0237075	Up
APOBR	16.2	8.9	14.7	12.1	212.9	69.1	13.1	52.2	2.79491	0.000454736	0.0075214	Up
FAM110C	113.1	189.3	110	80.6	266.4	373.4	203.7	391.8	1.31177	0.000510378	0.00820137	Up
TMED9	1060.8	1173	1219.4	1295.5	4716.4	3363.5	1452.1	2170.3	1.30022	0.00053874	0.00857738	Up
RBM43	193.9	207.6	231	257.9	36.5	61.9	138.2	121	-1.31969	0.00309329	0.0297749	Down
JAG2	166.9	151.9	75.2	92.7	783.4	327.5	140.9	263.4	1.6497	0.00266423	0.0267541	Up
FMNL1	75.4	59.5	42.2	59.4	533.5	324.6	124	192.6	2.33175	2.46482e-06	0.000140441	Up
MUC6	5.4	7.6	5.5	2	7.6	157.9	2.2	29.4	3.26423	0.00592947	0.0470816	Up
USP18	59.2	50.6	31.2	37.3	268.2	221.3	55.2	76.2	1.82186	0.00165398	0.019111	Up
BRI3BP	43.1	66.5	56.8	92.7	208.2	278.8	71	155.1	1.42754	0.00293427	0.0287784	Up
DGAT1	166.9	204.5	168.7	231.7	1928.5	1292.7	208.6	703.4	2.41695	2.87174e-05	0.000906083	Up
CA13	10.8	5.7	7.3	16.1	37.1	54.6	15.8	36.1	1.86115	0.00340429	0.0318999	Up
ANO9	5.4	1.9	0	6	257	80.1	3.3	120.4	5.19529	5.99666e-06	0.000267381	Up
MFSD6L	0	0	1.8	1	44.7	84.4	0.5	18.1	5.47825	0.000238677	0.0046524	Up
PRSS57	5.4	1.3	16.5	5	0	0	0.5	0	-5.18845	0.00209326	0.0224867	Down
TNFAIP2	339.2	380.4	110	374.7	8375.8	3891.2	536.3	1205.5	3.53971	2.31878e-06	0.000134084	Up
UBALD2	150.8	111.4	111.9	115.8	565.8	323.2	157.8	204.6	1.36677	0.00190346	0.0210306	Up
NOTUM	0	0	0	1	12.4	18.9	10.4	4	4.5328	0.000714649	0.0105863	Up
KLHL33	53.8	50.6	82.5	62.5	5.9	8.7	33.3	24.1	-1.79122	0.0030156	0.029354	Down
IL3RA	21.5	10.1	14.7	8.1	43.5	40	26.2	69.5	1.88572	0.00052634	0.00843173	Up
MUC1	16.2	38.6	34.8	21.2	3928.2	15535.8	50.2	1169.4	7.52603	1.29262e-12	1.67555e-09	Up
AHNAK2	107.7	86.7	73.3	140	2161.4	818.1	115.8	89.6	2.96569	0.000503343	0.00812189	Up
OLFML2A	1007	1283.1	839.8	807.9	364.1	171.1	645.5	133.1	-1.58332	0.00165493	0.019111	Down
NTF3	96.9	129.1	132	159.2	14.7	11.6	84.1	24.7	-1.93848	0.00241967	0.0249093	Down
SLC52A2	226.2	327.3	251.2	233.7	3348.3	1637.7	297.1	514.8	2.47902	0.000177884	0.00371081	Up
NAT8L	32.3	148.1	33	61.4	832.2	511	77.5	427.9	2.71835	0.000146683	0.00317337	Up
EVI2B	26.9	18.4	12.8	18.1	49.4	40.8	36	72.2	1.45386	0.00105099	0.0139371	Up
KRT5	0	1.3	0	2	75.9	825.4	10.9	0.7	7.67177	0.000113299	0.0026032	Up
KIF18B	0	1.3	3.7	2	368.2	41.5	3.8	31.4	5.84193	4.83907e-06	0.000231605	Up
SAPCD2	0	6.3	1.8	3	1756.8	533.5	3.8	60.2	7.49819	1.42476e-08	2.7027e-06	Up
SOWAHB	0	1.3	0	1	82.9	99.7	2.7	84.9	6.22453	1.06595e-06	7.33667e-05	Up
ZNF555	172.3	107	133.9	127.9	55.9	34.9	81.9	74.2	-1.10362	0.00191095	0.0210367	Down
ARHGAP30	75.4	101.3	55	125.9	465.8	247.5	149.1	259.4	1.62925	0.000231914	0.00455632	Up
CYP4F3	0	0.6	0	1	20.6	93.2	1.6	86.3	6.16756	1.16941e-05	0.00045268	Up
KATNA1	210	221.6	297.1	202.5	66.5	89.5	168.2	110.3	-1.10002	0.00189218	0.020985	Down
HYAL3	21.5	22.8	40.3	32.2	140	279.5	35.5	44.1	2.07921	0.00284017	0.0280857	Up
LILRB4	37.7	17.7	7.3	13.1	334.1	170.3	54.6	101.6	3.25061	1.36751e-06	8.68231e-05	Up
TNFRSF4	0	8.2	3.7	17.1	98.8	40	21.8	123.7	3.08995	0.000139439	0.00304631	Up
KRT14	0	0	0	1	298.2	149.2	0.5	1.3	7.77644	2.04563e-05	0.000713448	Up
TNFRSF18	0	1.9	3.7	2	55.3	235.1	1.6	5.3	5.12371	0.000178432	0.00371554	Up
EMID1	172.3	136.7	141.2	155.1	281.1	380.7	276.3	388.5	1.15038	9.20765e-07	6.56996e-05	Up
ESPN	5.4	7.6	7.3	5	687.5	3523.6	4.4	96.3	7.39318	2.99975e-09	8.80458e-07	Up
PTRH1	140	106.3	143	123.9	499.3	644.9	130.5	158.5	1.4864	0.00608699	0.0479894	Up
GPR141	0	0.6	0	0	37.6	9.5	1.6	4	4.84152	0.00275811	0.0274663	Up
MITF	387.7	209.5	374.1	236.7	67	119.4	218.4	82.2	-1.29988	0.00361201	0.0331474	Down
MT1X	26.9	47.5	29.3	28.2	84.7	64.8	77	140.4	1.42512	0.000673319	0.010166	Up
GCNT1	21.5	19	5.5	20.1	94.1	42.9	26.8	431.9	3.18275	0.000291783	0.00542905	Up
BCAM	2084	1070.4	836.1	1211.9	18781.9	24873.7	1047.4	1157.4	3.14089	0.000350016	0.00615894	Up
FPR3	86.2	40.5	23.8	36.3	325.2	92.4	75.4	137.7	1.823	0.00206455	0.022286	Up
COL4A1	1357	1204	634.4	903.6	5280.4	2199.6	1462.4	9220.3	2.14879	0.000139035	0.00304484	Up
PLEKHN1	0	1.9	0	1	62.9	35.7	4.4	9.4	4.66613	0.000240072	0.0046679	Up
ISG15	177.7	195.6	89.8	123.9	3944.7	963	235.4	320.9	3.22023	4.49744e-05	0.00129224	Up
SPRY4	75.4	34.8	40.3	17.1	683.4	430.2	104.3	364.4	3.3131	6.6028e-08	8.48815e-06	Up
C2orf88	10.8	19	20.2	13.1	379.4	305.7	7.1	116.3	3.65332	4.30361e-05	0.00124893	Up
KBTBD12	5.4	3.2	5.5	1	56.5	8	2.2	56.2	3.16236	0.00518346	0.0426335	Up
THSD4	215.4	165.9	218.2	131	10793.7	10211.4	178	616.5	4.90166	2.30218e-07	2.13157e-05	Up
GABRD	0	1.3	0	0	38.2	13.8	3.3	22.1	4.88827	0.000372995	0.00643944	Up
CARD9	5.4	13.3	7.3	14.1	335.8	223.5	26.2	58.2	3.91418	1.4821e-06	9.22163e-05	Up
PALM3	5.4	5.1	3.7	1	221.1	141.9	1.6	30.1	4.77771	4.81851e-05	0.00136524	Up
S100A3	5.4	0.6	0	3	44.7	123	4.9	10	4.71083	0.0001715	0.00360717	Up
ARL4C	48.5	91.8	33	67.5	1419.2	505.9	202.1	168.5	3.23599	2.83988e-06	0.000154998	Up
WNT7B	5.4	2.5	0	0	37.6	48.8	1.6	12.7	4.09172	0.00220878	0.0233566	Up
MESP2	0	0	1.8	0	9.4	66.2	0.5	0.7	5.20981	0.00616043	0.0483607	Up
C6orf132	0	12.7	0	8.1	1069.3	937.5	37.7	160.5	6.52006	2.99995e-09	8.80458e-07	Up
TMEM215	16.2	11.4	11	13.1	45.9	18.2	35.5	262.8	2.84096	0.000782644	0.0112827	Up
AGRN	705.4	778.6	513.4	599.4	9810.3	5633	843.2	1931.6	2.81072	1.17729e-05	0.00045441	Up
HES4	21.5	39.2	9.2	20.1	221.7	37.1	38.8	101	2.11604	0.00343486	0.0320704	Up
SERPINA5	333.9	360.8	319.1	463.4	424.1	597.6	767.3	2227.2	1.44099	0.00539664	0.0438812	Up
FAM83G	37.7	51.9	82.5	68.5	244.1	126.7	78.1	240	1.4911	0.00151989	0.0181303	Up
CCDC9B	86.2	69	60.5	43.3	633.4	772.3	97.2	163.8	2.70292	2.97967e-05	0.00093257	Up
ZNF177	80.8	73.4	73.3	96.7	28.2	31.3	55.2	38.8	-1.07764	0.00184911	0.0207525	Down
S100A16	673.1	920.4	715.1	783.7	3891.8	3046.9	1033.8	1408.1	1.59919	0.000262108	0.00497812	Up
ZDHHC9	199.2	274.7	317.2	325.4	591.7	1191.5	341.9	466.7	1.20667	0.0045768	0.0390522	Up
BCL2L15	5.4	3.2	1.8	1	11.2	37.8	2.2	90.3	3.82726	0.00111589	0.0144768	Up
SPRED3	0	6.3	3.7	2	31.2	12.4	18.6	17.4	2.41773	0.0022178	0.0234133	Up
ENTPD8	0	1.9	3.7	3	73.5	19.7	3.8	67.5	4.07922	0.000135751	0.00300245	Up
KLRG2	0	0.6	0	0	573.4	86.6	0	0	9.58612	0.0046105	0.0392321	Up
GJB3	0	0	0	0	288.2	141.9	1.6	12.7	8.57496	5.0676e-07	4.12704e-05	Up
CLDN4	26.9	28.5	58.7	30.2	4198.2	8090.3	111.4	1511.8	6.58582	9.82595e-14	1.91053e-10	Up
S100A14	5.4	5.1	7.3	4	527.6	2538.8	6	222.7	7.25324	3.9063e-10	1.64223e-07	Up
CXCL17	0	2.5	3.7	0	167	730.1	2.7	7.4	6.99867	3.88723e-06	0.000196318	Up
IL1RAP	64.6	32.3	36.7	22.2	474	125.2	60.6	99	2.33857	0.000625627	0.00961623	Up
HLA-DRB1	1238.5	333.6	645.4	831.1	7785.3	14133.9	2056.6	3705.5	3.18636	1.73856e-07	1.7475e-05	Up
GREB1	12579.2	6164.3	7851.7	5553.6	938.1	531.3	4403.1	3054.9	-1.84807	0.00304332	0.0295277	Down
SIRPB2	10.8	4.4	0	5	51.2	12.4	16.4	16	2.45728	0.00536653	0.0437278	Up
NTNG2	0	1.9	3.7	2	30.6	30.6	8.2	8	3.16781	0.00104344	0.0138846	Up
ZNF774	10.8	28.5	29.3	19.1	204.1	139	22.4	30.8	2.12905	0.00513054	0.0424046	Up
C20orf204	5.4	8.2	1.8	14.1	1012.8	138.3	6	22.1	5.26767	1.88006e-05	0.000666159	Up
SULT1A1	80.8	120.3	95.3	94.7	152.3	379.2	111.9	322.3	1.28886	0.00435962	0.0378215	Up
MME	16.2	20.3	5.5	29.2	221.7	117.9	78.1	364.4	3.41412	9.75454e-08	1.13174e-05	Up
MYO6	129.2	131	99	129.9	272.9	699.5	158.4	377.1	1.62367	0.000456683	0.00754109	Up
MMP1	0	0	1.8	0	358.2	7.3	1.6	270.8	8.29079	7.6603e-07	5.70125e-05	Up
TLR7	16.2	15.2	9.2	10.1	32.3	46.6	30.6	57.5	1.7535	0.000304357	0.00561599	Up
HSH2D	16.2	6.3	7.3	5	164.7	175.4	4.4	52.2	3.64776	0.000124446	0.00279331	Up
ZNF431	484.6	354.5	319.1	507.7	87	93.2	314	97.6	-1.48952	0.0021716	0.0230763	Down
HLA-DQA1	118.5	31.7	78.8	174.3	1509.8	267.9	322.7	1022.3	2.9598	1.03571e-05	0.000412032	Up
TLE1	403.9	436.8	434.6	627.6	1809.7	622.3	898.3	709.4	1.08292	0.00608218	0.0479758	Up
ADA	37.7	26	18.3	20.1	122.3	152.9	29.5	115	2.09758	0.000214335	0.00429513	Up
KIAA1211L	10.8	24.7	14.7	18.1	180	198	28.4	148.4	2.95076	3.83134e-06	0.00019476	Up
LAMB3	5.4	43	45.8	49.4	489.9	141.2	53.5	504.8	2.99615	6.8998e-05	0.00176814	Up
SERTAD1	236.9	256.4	223.7	142	658.7	282.4	878.1	265.4	1.28264	0.00536193	0.0437132	Up
ZNF420	166.9	124.1	66	121.9	72.9	46.6	56.8	46.8	-1.07336	0.00277373	0.0275162	Down
ARRDC1	113.1	161.4	126.5	152.1	1181.6	561.2	166.6	325.6	2.00695	0.000326668	0.00589158	Up
SLC6A17	5.4	1.9	0	0	18.2	12.4	5.5	20.1	3.51499	0.00185343	0.0207859	Up
NOL4L	166.9	236.1	121	88.6	682.3	959.3	132.7	416.6	1.83785	0.00160617	0.0187568	Up
CYSRT1	0	1.3	0	1	53.5	14.6	1.1	6.7	4.41492	0.0026608	0.0267472	Up
SERPINA1	64.6	43	12.8	54.4	1301.6	1931.8	107	602.4	4.51366	3.20005e-09	9.21793e-07	Up
PELI1	145.4	82.3	58.7	83.6	408.2	434.5	107.6	212.6	1.68367	0.000874844	0.0122868	Up
C5AR1	26.9	67.1	18.3	29.2	258.8	61.9	232.6	100.3	2.16373	0.00040642	0.00690914	Up
OGDHL	43.1	69.6	95.3	35.3	428.2	360.3	84.1	64.9	1.93585	0.00398895	0.0356189	Up
GSTK1	662.3	667.8	643.6	597.4	2189.7	3125.5	716.5	1134.6	1.47905	0.000950299	0.0129777	Up
HNRNPAB	748.5	833.1	698.6	750.5	2376.7	3012.7	1036.5	1182.8	1.32739	0.000528524	0.00845801	Up
PDGFA	150.8	57	51.3	35.3	138.8	159.4	143.1	332.3	1.46894	0.00531115	0.0433674	Up
SLC28A3	0	1.3	3.7	4	90	153.6	7.6	3.3	4.67115	0.000163029	0.00346437	Up
MFAP5	10.8	3.2	3.7	2	202.9	13.1	2.7	131	4.38951	0.000160344	0.00341197	Up
MPEG1	166.9	162.7	71.5	90.7	272.3	223.5	196	495.4	1.28591	0.00321608	0.030597	Up
SERPINB2	0	0	0	0	20.6	26.9	1.1	1.3	5.41975	0.00351947	0.0325672	Up
KLHL14	16.2	19	7.3	6	575.2	792.7	10.4	3.3	4.84542	7.28174e-05	0.00184629	Up
TAF13	10.8	31	12.8	19.1	86.5	84.4	44.8	58.2	1.76729	0.000272497	0.00513159	Up
OCLN	26.9	20.9	22	24.2	174.1	131	43.1	155.8	2.44797	1.62607e-06	9.99743e-05	Up
ADAMTSL2	26.9	13.3	18.3	26.2	123.5	192.2	262.7	676.6	3.93305	5.68262e-11	3.1569e-08	Up
TEAD4	48.5	43	20.2	26.2	221.1	144.1	85.7	148.4	2.16256	1.00938e-06	7.00935e-05	Up
HRNR	156.2	91.8	7.3	16.1	2.9	10.2	15.8	10	-2.76609	0.00246431	0.0252839	Down
S100A6	893.9	1036.3	1041.5	1144.4	6186.7	13486.8	1059.4	2794.8	2.51451	7.92373e-05	0.00197206	Up
FCGR1B	0	8.2	9.2	4	31.8	18.9	33.3	17.4	2.02842	0.00191496	0.0210659	Up
CD2AP	80.8	57	45.8	52.4	156.4	353	47	141.1	1.5862	0.00616983	0.0483607	Up
CHSY3	10.8	11.4	1.8	8.1	58.2	19.7	34.4	58.8	2.41415	0.000252004	0.00483293	Up
TMEM229B	53.8	43.7	20.2	45.3	105.3	171.8	31.7	200.6	1.6605	0.0057001	0.0456331	Up
CSF2RA	10.8	19.6	14.7	14.1	85.9	68.4	31.1	64.2	1.99951	5.35993e-05	0.00147674	Up
GFPT1	290.8	338	308.1	344.5	565.8	1425.2	436.9	594.4	1.23444	0.00230549	0.0240595	Up
MT1F	0	3.8	1.8	7.1	87.6	61.9	13.7	348.4	5.09146	6.53074e-07	5.10481e-05	Up
SH3BGRL2	53.8	61.4	40.3	58.4	94.1	488.4	60.6	225.3	2.01563	0.0015738	0.0185041	Up
ANKRD35	323.1	234.2	247.5	217.6	30	51	139.8	151.1	-1.4527	0.00572859	0.0457491	Down
HLA-DRB5	737.7	13.9	484.1	533.9	3703.6	8792	1134.8	1812	3.12886	0.000492992	0.00800456	Up
FAM3D	0	0	0	0	5.3	26.2	0	128.4	7.0993	0.000616248	0.00953805	Up
ABCA4	5.4	5.1	1.8	6	20.6	21.8	8.2	30.8	2.12502	0.00448666	0.038473	Up
MT-CO2	21609.7	21196.6	29631.7	24339.8	53274.4	102096	31445.1	48050.4	1.27906	0.000686165	0.0102529	Up
PLXNB3	26.9	26.6	9.2	10.1	110.6	723.5	15.3	53.5	3.65803	0.000234885	0.00459534	Up
ALPK2	0	0.6	3.7	1	100	5.1	4.4	24.7	4.53821	0.000545131	0.00864374	Up
PNP	53.8	60.1	25.7	32.2	715.2	270.8	115.2	399.2	3.13629	5.9174e-08	7.80044e-06	Up
ARHGAP11A	10.8	10.1	12.8	8.1	204.1	53.1	12.6	28.1	2.84836	0.000938733	0.0128879	Up
TOP1	306.9	352.6	253	325.4	734.6	925.1	420.5	433.9	1.01921	0.00229042	0.0239593	Up
PRC1	21.5	46.2	86.2	52.4	751.1	191.4	68.3	99.6	2.40729	0.00153857	0.0182194	Up
L1CAM	86.2	12.7	31.2	6	248.8	1029.9	11.5	16.7	3.31716	0.00526157	0.0430983	Up
CCDC167	26.9	51.3	42.2	36.3	328.2	214.7	38.8	88.3	2.06927	0.00131815	0.0165354	Up
IQANK1	5.4	5.7	5.5	5	572.3	476.8	0	10	5.61351	7.75726e-05	0.00193994	Up
CAPN8	0	0.6	0	5	1.2	155.8	0.5	260.8	5.91793	0.000412705	0.00697785	Up
FCGR3A	91.5	48.1	34.8	108.8	915.7	730.8	355.5	414.5	3.11063	9.67175e-11	4.70138e-08	Up
CENPW	5.4	6.3	5.5	3	126.5	17.5	5.5	14.7	3.02933	0.00363162	0.0332881	Up
HIST2H2BF	53.8	53.2	73.3	106.8	23.5	36.4	41	12.7	-1.35462	0.00540482	0.0439248	Down
SOX18	199.2	124.1	86.2	128.9	662.3	595.4	114.7	436.6	1.76478	0.000923028	0.0127511	Up
GPRIN2	0	1.3	0	4	18.2	10.2	1.6	98.3	4.25212	0.00222594	0.0234743	Up
HLA-DOA	113.1	154.5	60.5	112.8	1334.5	3757.3	147.4	205.3	3.62436	2.54075e-05	0.000835546	Up
HLA-DMA	269.2	168.4	150.4	134	776.4	2841.6	273.6	444.6	2.59529	0.000121355	0.0027318	Up
COL5A2	1087.8	1115.4	665.6	884.5	4938.7	793.4	1242.4	4407.5	1.60103	0.00511249	0.042282	Up
TAP2	398.5	239.9	311.7	365.7	2061.5	2511.2	233.2	323.6	1.96504	0.00516355	0.042563	Up
HLA-DRA	2121.7	2201	1358.7	1893.8	12048.8	33788.7	4149.8	6586.6	2.90089	1.13117e-06	7.58418e-05	Up
SLC44A4	32.3	57.6	58.7	57.4	587	1808	67.2	751.5	3.94519	1.12504e-07	1.2324e-05	Up
NEU1	500.8	484.3	484.1	415	1634.5	1034.3	536.8	790.3	1.08625	0.00268345	0.026895	Up
LY6G6C	0	1.9	0	2	52.3	123.7	0.5	0.7	5.07128	0.00215991	0.022985	Up
AIF1	86.2	53.2	29.3	43.3	155.9	104.8	121.2	152.4	1.42025	8.99396e-05	0.00219625	Up
LST1	16.2	20.9	12.8	5	100	30.6	23.5	63.5	1.99959	0.00353297	0.0326339	Up
MICB	0	8.2	9.2	3	81.8	26.9	8.7	23.4	2.61987	0.00373485	0.0339542	Up
HLA-C	3117.9	2388.4	4032.2	2906.2	11773.5	15733.8	5918.5	3128.5	1.55468	0.00129265	0.0162811	Up
C6orf15	0	1.9	0	2	317.6	2297.2	1.6	2.7	8.99481	2.45751e-05	0.000813331	Up
LILRB3	0	8.9	3.7	8.1	70	7.3	22.9	38.1	2.51952	0.00426898	0.0373685	Up
DDR1	1335.5	1639.5	1384.4	1333.7	7148.4	10225.2	1480.5	1635.4	1.84731	0.00212598	0.0227283	Up
TRIM15	0	0	0	1	12.9	52.4	0	93.6	6.27917	0.000465079	0.00764725	Up
RNF39	48.5	32.9	47.7	24.2	91.2	956.4	23.5	78.2	2.92116	0.00202738	0.0219915	Up
HLA-G	0	0	0	3	81.2	71.3	0.5	5.3	5.27296	0.00158226	0.0185471	Up
MROH6	48.5	37.3	38.5	28.2	1045.7	346.5	26.2	58.8	3.28895	0.000310748	0.00570682	Up
PKHD1L1	59.2	35.4	45.8	32.2	644	1755.6	24.6	17.4	3.83333	0.000382321	0.00657855	Up
TMEM88B	0	0	0	0	72.9	24	1.1	0.7	6.4044	0.00094458	0.0129339	Up
PSENEN	107.7	131.7	163.2	148.1	595.2	342.1	195	206.6	1.27178	0.00270811	0.0270203	Up
ADGRG1	107.7	69	45.8	41.3	1514.5	5290.2	78.6	442	4.811	1.91238e-07	1.86986e-05	Up
KRT6A	0	0	0	1	701.7	315.9	6	0.7	8.94141	6.29366e-05	0.00165929	Up
RGL3	32.3	19.6	16.5	19.1	398.8	163	19.1	28.8	2.83629	0.00115402	0.014897	Up
DENND1C	16.2	8.9	5.5	22.2	109.4	68.4	17.5	55.5	2.26974	0.00121334	0.0155082	Up
GMNC	0	3.2	3.7	1	68.8	353	0.5	1.3	5.58154	0.000346088	0.00609671	Up
SERPINB5	0	0.6	0	0	27.6	7.3	0.5	84.9	6.03197	0.000328093	0.00589871	Up
IGKC	3376.3	1751.6	2499.3	2784.3	351.7	155.8	675.5	37.4	-3.09178	6.65656e-06	0.000289447	Down
IGKV4-1	188.5	38	40.3	166.2	5.3	9.5	31.7	0.7	-3.18269	0.000691995	0.0103202	Down
IGLV2-11	53.8	50.6	89.8	22.2	3.5	4.4	10.9	2.7	-3.30637	6.87136e-07	5.29129e-05	Down
IGHG1	12180.7	6442.9	7184.2	7879.6	1156.3	625.2	2446.5	77.6	-2.96764	6.79519e-05	0.00175289	Down
IGHG3	963.9	294.4	795.8	253.9	287	32.8	102.1	48.1	-2.2905	0.00136259	0.016929	Down
RNF208	21.5	36.7	14.7	25.2	309.4	120.8	21.8	40.8	2.30552	0.00377184	0.0341905	Up
ARHGEF35	32.3	41.1	67.8	38.3	240	227.8	68.3	80.2	1.7637	0.00107422	0.0141486	Up
GSTM2	1486.2	1130.6	1853.8	1401.2	197.6	228.6	1127.7	423.2	-1.56978	0.00434953	0.0377796	Down
SRA1	80.8	164.6	126.5	147.1	254.1	369	261	197.2	1.01839	0.00138417	0.0171287	Up
VDAC1	581.6	688.1	561.1	529.9	1790.3	3138.6	799.5	1221.6	1.55711	0.000223034	0.00440266	Up
SULT1A4	91.5	110.1	86.2	108.8	237	226.4	96.1	312.2	1.12498	0.00483524	0.0406666	Up
GPSM3	53.8	50	14.7	47.3	389.4	320.3	90.1	163.1	2.54891	8.90831e-06	0.000364655	Up
UBD	5.4	8.2	0	12.1	307	99.7	0	20.7	4.01612	0.00624862	0.0487205	Up
CLDN9	0	1.3	0	0	37.6	122.3	1.1	4.7	6.01582	0.000298042	0.00553228	Up
ITGA1	183.1	108.9	53.2	93.7	252.9	264.9	297.6	942.8	2.02766	0.000276067	0.00518228	Up
MEF2B	43.1	46.8	23.8	30.2	6.5	8.7	19.1	14	-1.5593	0.00329897	0.031157	Down
ALG3	156.2	160.8	166.9	191.4	608.7	604.1	160.6	300.9	1.30662	0.00347487	0.0322889	Up
NPIPA8	0	4.4	0	0	52.9	2.9	4.9	159.8	5.17335	0.000906539	0.0126129	Up
ATAD3C	5.4	20.3	23.8	28.2	120	1032.9	21.8	42.1	3.9251	0.000166566	0.00353469	Up
IFI30	123.9	98.8	73.3	116.9	2769	522.6	251.2	706.1	3.36851	4.23465e-07	3.61923e-05	Up
LINGO3	0	1.3	3.7	3	21.8	8	8.7	14.7	2.58628	0.0044269	0.0381498	Up
ZBED8	129.2	94.3	113.7	111.8	27.6	68.4	63.9	50.1	-1.08085	0.00291395	0.0286513	Down
SLC12A8	5.4	8.9	3.7	9.1	192.9	151.4	53	135.1	4.18384	2.2412e-12	2.68168e-09	Up
CKMT1A	0	1.9	1.8	0	42.3	49.5	0	163.1	5.75204	0.000268889	0.00506977	Up
HLA-DPB1	721.6	752.7	544.6	662.8	2440.2	6608.4	1155.5	1585.3	2.13647	5.19321e-05	0.00144251	Up
C1QTNF5	140	207	78.8	107.8	533.5	238.7	387.2	1271.7	2.18439	8.25346e-05	0.00202854	Up
C4B	1491.6	1480.6	1001.2	1548.3	1348.6	3929.8	9531	5862.5	1.90458	0.000245839	0.00475656	Up
NPIPA3	70	6.3	69.7	53.4	2.4	2.9	13.1	0	-3.40913	0.00139525	0.0171973	Down
MKRN2OS	0	3.2	5.5	1	38.8	32.8	3.8	20.7	3.16002	0.00183033	0.0205863	Up
SLC26A6	64.6	82.9	64.2	75.6	164.7	230.7	70.4	228.7	1.25823	0.00346239	0.0322114	Up
ELFN1	10.8	15.2	1.8	13.1	77	31.3	32.8	35.4	2.05038	0.00162218	0.0188446	Up
FTCDNL1	5.4	7.6	11	5	36.5	47.3	13.1	26.7	2.06667	0.00155694	0.018361	Up
PROB1	26.9	39.9	20.2	47.3	159.4	330.5	34.4	86.9	2.15817	0.00145581	0.0176607	Up
HLA-DPA1	640.8	1023.6	553.8	1030.5	2802.5	7342.1	1844.2	1858.8	2.08933	3.39251e-05	0.00103443	Up
TAPBP	910.1	784.9	823.3	958	2376.1	2688	1032.1	1218.9	1.0739	0.00279934	0.0277348	Up
HLA-DQB2	0	1.3	1.8	3	57.1	387.2	1.1	2	5.95752	9.41834e-05	0.0022891	Up
TNF	0	3.2	3.7	4	60	25.5	3.8	10	2.9892	0.00444224	0.0382185	Up
GPX1	1287	1490.1	1839.1	1645	6097.9	5274.2	1730.6	2413.1	1.30838	0.00214925	0.0228983	Up
TMEM238	0	0	1.8	1	50	15.3	0.5	12.7	4.5643	0.00249084	0.0254734	Up
HLA-B	5734.9	4359	3408.7	3635.6	23861.2	32439.9	3849.4	5813.7	1.94475	0.0018858	0.020985	Up
APOC2	0	0.6	0	0	49.4	12.4	4.9	4.7	5.2745	0.000448698	0.00745673	Up
NFAM1	32.3	24.7	14.7	18.1	148.2	112.1	50.2	92.3	2.22895	3.04371e-06	0.000163823	Up
B3GALT4	48.5	67.7	62.3	56.4	270	171.1	94.5	105.6	1.4275	0.000837786	0.0119338	Up
CKMT1B	0	1.3	0	4	58.8	141.2	2.7	139.1	5.64457	4.47135e-06	0.000220601	Up
ZNF737	247.7	299.4	161.4	363.7	72.3	91	184.6	99.6	-1.26504	0.00186792	0.0208925	Down
KIFC1	21.5	32.3	44	32.2	953.4	136.1	43.7	42.8	3.16288	0.000575509	0.0090122	Up
AMY1A	0	0	0	0	2322.6	473.1	0	2.7	25.2158	9.14418e-14	1.91053e-10	Up
NME1	360.8	292.5	245.7	335.5	1844.4	899.7	281.2	524.2	1.52622	0.00434435	0.0377735	Up
IGKV3-20	64.6	161.4	62.3	56.4	9.4	17.5	15.8	1.3	-2.9825	2.19234e-05	0.000749719	Down
TNFRSF13B	16.2	6.3	5.5	3	0.6	0	0.5	0	-4.48007	0.0018901	0.020985	Down
HLA-DOB	0	2.5	0	3	30	51.7	2.2	5.3	3.62269	0.0054605	0.0442155	Up
IGKV2-24	16.2	19	3.7	3	0	0	1.6	0	-4.5515	0.00306281	0.0295733	Down
ARHGAP8	5.4	5.1	5.5	8.1	164.1	240.2	2.2	60.8	4.26527	3.76681e-05	0.00111818	Up
MTFP1	21.5	32.9	40.3	39.3	404.1	147	44.8	99.6	2.34721	0.000358989	0.00626665	Up
HLA-DMB	129.2	174.1	91.7	159.2	1255.7	2868.6	409	485.4	3.17406	2.11425e-07	1.99316e-05	Up
PCDHAC2	0	2.5	5.5	2	60.6	37.8	3.8	32.1	3.5999	0.000334138	0.00597416	Up
C4orf48	43.1	46.8	34.8	67.5	405.8	200.9	104.8	319.6	2.40445	7.30627e-07	5.49029e-05	Up
IGKV1-5	53.8	93.1	174.2	14.1	11.8	8	26.2	0.7	-2.84226	0.00246581	0.0252839	Down
CFB	86.2	115.2	64.2	191.4	4862.8	5436.5	329.8	636.5	4.61658	7.17883e-09	1.64216e-06	Up
ACY1	102.3	118.4	113.7	102.8	641.1	757.7	162.2	437.3	2.1884	2.40369e-06	0.000137968	Up
SPRR2F	210	733	284.2	297.2	1.8	36.4	91.2	93.6	-2.77664	0.00106121	0.0140247	Down
IGKV2-28	86.2	88.6	102.7	123.9	8.8	6.6	25.7	0.7	-3.2586	1.39999e-05	0.000523482	Down
ETV5	70	35.4	49.5	45.3	232.9	190	96.7	282.2	2.06178	1.18193e-06	7.79025e-05	Up
IGKV3-15	48.5	117.7	102.7	24.2	8.8	7.3	12	0	-3.38394	9.5795e-05	0.00231381	Down
CCDC13	5.4	1.9	7.3	2	19.4	16.7	13.7	13.4	2.18217	0.00389565	0.0349466	Up
FCGR2C	16.2	3.2	3.7	6	38.2	44.4	30.6	37.4	2.78268	4.38188e-06	0.000217071	Up
C4A	2035.5	1785.7	942.5	1500	1859.1	5600.3	7417.6	3207.4	1.53071	0.000856157	0.0121289	Up
CEBPA	70	41.8	49.5	59.4	278.8	174	57.9	300.2	1.90155	0.000307313	0.00565041	Up
PRR5-ARHGAP8	0	0	0	0	13.5	8.7	4.4	2.7	4.65236	0.00386142	0.0347796	Up
FMN1	21.5	7	12.8	10.1	62.9	191.4	16.9	47.5	2.7519	0.000417392	0.00704179	Up
AC068580	26.9	74.1	16.5	41.3	140.6	590.3	44.2	133.7	2.48486	0.0014299	0.0174997	Up
PCDHA12	0	2.5	0	1	107.6	3.6	3.3	24.1	4.77081	0.000915174	0.0127183	Up
PCDHGB6	312.3	275.4	346.6	407	112.3	133.2	279.6	95.6	-1.11149	0.00517271	0.0425948	Down
C1orf210	0	0	0	0	199.4	248.9	1.1	99	8.87779	3.20153e-08	5.29784e-06	Up
TRNP1	21.5	62	1.8	14.1	214.1	302.8	18	245.4	2.93939	0.00172594	0.0197055	Up
LYN	96.9	84.2	64.2	66.5	341.7	155.8	127.8	260.8	1.52721	0.000142765	0.00310589	Up
MPV17L2	102.3	105.1	95.3	75.6	301.1	195.1	115.8	177.9	1.06935	0.00323321	0.0307036	Up
DPP3	91.5	132.9	121	137	1422.7	1088.9	142	279.5	2.59633	7.28784e-05	0.00184629	Up
HTD2	145.4	73.4	124.7	112.8	45.9	68.4	55.2	50.8	-1.01217	0.00161608	0.0188077	Down
HMBS	37.7	71.5	44	61.4	360.5	235.1	60.6	94.9	1.77961	0.00264805	0.0266605	Up
ZNF225	96.9	105.1	122.9	65.5	39.4	45.1	51.9	56.2	-1.01287	0.00147874	0.0178442	Down
HP	10.8	10.8	64.2	76.6	9369.2	2979.9	68.3	15.4	6.25079	6.3534e-05	0.00166938	Up
CLEC5A	0	1.3	5.5	7.1	105.9	12.4	5.5	23.4	3.27786	0.00347079	0.0322702	Up
TUBB3	16.2	94.3	14.7	60.4	1325.7	286.8	197.7	327	3.47863	4.98308e-06	0.000235598	Up
NDUFC2-KCTD14	0	8.2	0	8.1	45.3	69.1	12	12.7	2.83098	0.00563372	0.0452276	Up
HOXB7	0	7.6	5.5	2	26.5	203.1	3.3	13.4	3.8603	0.00163017	0.0189093	Up
SCX	5.4	3.8	1.8	4	246.4	106.3	5.5	36.8	4.77348	5.10916e-06	0.000240099	Up
AC245033	16.2	4.4	16.5	5	0	0	1.6	2	-3.42766	0.00510078	0.042271	Down
EPPK1	21.5	24.7	25.7	31.2	14692.5	2962.5	26.8	411.2	7.4478	8.89741e-11	4.46449e-08	Up
BOP1	280	267.8	264	285.1	3399.5	1342.9	262.1	446.6	2.31334	0.000726118	0.0106896	Up
TPBGL	5.4	0.6	0	0	15.3	10.9	4.9	10	3.80848	0.00262309	0.0265054	Up
BOLA2-SMG1P6	107.7	151.9	148.5	124.9	379.4	395.2	192.8	217.3	1.13578	0.000826083	0.0118213	Up
CORO7	91.5	143.7	161.4	140	380.5	322.4	150.7	337.7	1.1286	0.00190804	0.0210367	Up
SPON1	517	1058.4	1080	1815.3	8184.7	3236.1	1107.5	1896.2	1.68793	0.00646723	0.0499279	Up
IKBKE	32.3	53.2	51.3	53.4	334.1	316.6	55.7	118.3	2.09005	0.000369107	0.00638685	Up
RHEX	0	1.3	0	1	91.8	71.3	0	2	5.56134	0.00171335	0.0196532	Up
UPK3BL1	96.9	65.8	75.2	64.5	811.1	235.8	90.7	152.4	2.10694	0.00113957	0.0147348	Up
AC011498	177.7	75.3	188.9	95.7	10.6	8.7	73.7	12.7	-2.33079	0.00167534	0.0193036	Down
ZNF285	123.9	131	115.5	119.9	54.7	33.5	61.7	89.6	-1.03354	0.0036009	0.0330844	Down
SMIM22	0	1.9	3.7	2	235.8	271.5	0.5	79.6	6.10327	1.91361e-06	0.000114047	Up
AC007192	0	6.3	0	19.1	115.9	67	57.3	62.2	3.33459	4.71335e-05	0.00134033	Up
FBXO17	893.9	869.1	1037.8	888.5	418.8	206	634.6	544.9	-1.03151	0.00394051	0.035247	Down
MAGIX	10.8	7	11	17.1	73.5	83.7	9.8	31.4	2.1102	0.00520557	0.0427522	Up
SPIB	0	0.6	0	0	2.9	6.6	1.1	44.8	4.9114	0.00438139	0.0379468	Up
AL591806	96.9	118.4	172.4	109.8	835.8	553.2	111.4	195.2	1.76439	0.00345094	0.0322012	Up
MILR1	10.8	7	5.5	7.1	80.6	46.6	39.3	45.5	2.91049	4.85673e-08	7.06042e-06	Up
CD24	48.5	44.3	22	58.4	3393	12883.4	60.6	390.5	6.5941	1.00138e-09	3.70868e-07	Up
CFAP206	0	0	1.8	1	10	29.1	3.8	5.3	3.90105	0.00381858	0.0344736	Up
AL359736	0	0	0	0	28.2	2.9	1.6	4.7	5.00812	0.00599129	0.0474031	Up
PRAG1	113.1	168.4	121	149.1	317.6	275.1	342.9	908.7	1.72931	0.000114062	0.00260917	Up
FCGBP	204.6	490	225.5	685	2860.2	1739.6	2116.1	5179.8	2.88048	1.14773e-08	2.31857e-06	Up
PRSS2	5.4	0.6	1.8	5	61.2	7.3	2.2	682.7	5.99242	2.5827e-05	0.000842221	Up
UHRF1	10.8	12	7.3	5	938.1	243.8	17.5	53.5	5.17273	3.55694e-07	3.12588e-05	Up
CCL4L2	21.5	9.5	20.2	11.1	99.4	74.2	108.1	133.7	2.90545	5.10869e-11	2.94317e-08	Up
CCL3L1	0	0.6	0	0	68.8	37.1	78.6	96.3	7.23287	3.8917e-11	2.32828e-08	Up
SRCIN1	10.8	17.7	14.7	7.1	45.3	108.5	19.1	30.1	1.98501	0.0044197	0.0381434	Up
CCL3	10.8	32.9	3.7	7.1	202.9	63.3	238.6	87.6	3.35981	5.76616e-06	0.000260734	Up
PSMB3	409.3	410.8	454.7	491.6	1130.4	1187.2	549.9	697.4	1.01064	0.00111577	0.0144768	Up
DHRS11	59.2	43.7	75.2	67.5	201.1	406.2	56.8	446	2.17869	0.000263019	0.00498933	Up
AC009133	457.7	437.4	546.4	479.5	105.3	95.4	380.6	170.5	-1.35265	0.00368917	0.0336372	Down
BLACAT1	0	4.4	9.2	15.1	115.9	466.6	13.7	5.3	4.291	0.000366067	0.00636221	Up
ADORA3	26.9	7	18.3	15.1	68.8	93.2	18	54.2	1.92109	0.00317241	0.0302741	Up
AC019117	16.2	2.5	0	4	234.7	730.8	6	3.3	5.65093	6.15162e-05	0.00163291	Up
SLURP2	0	0	0	0	387.6	62.6	0	0	22.6708	2.08692e-11	1.47555e-08	Up
SCO2	59.2	72.2	58.7	45.3	260	174.7	45.9	154.5	1.4295	0.00635793	0.0493255	Up
EEF1AKMT4	10.8	15.8	14.7	11.1	283.5	144.1	18	42.8	3.19842	8.06602e-05	0.00199788	Up
CCDC39	32.3	17.7	18.3	17.1	1.2	6.6	9.3	2	-2.10334	0.00580807	0.046212	Down
AC008012	5.4	11.4	1.8	10.1	37.6	55.3	12.6	30.8	2.11993	0.00390098	0.0349739	Up
